# Supplementary material
Source: PubMed Central journal article supplement (PMC7262786)

**Electronic Structures and Reactivity Profiles of Aryl Nitrenoid–Bridged Dicopper  
Complexes**

Kurtis M. Carsch,<sup>†</sup> James T. Lukens,<sup>‡</sup> Ida M. DiMucci,<sup>‡</sup> Diana A. Iovan,<sup>†</sup> Shao-Liang Zheng,<sup>†</sup>  
Kyle M. Lancaster,<sup>‡\*</sup> and Theodore A. Betley<sup>†\*</sup>

*<sup>†</sup>Department of Chemistry and Chemical Biology  
Harvard University  
12 Oxford Street, Cambridge, MA 02138*

*<sup>‡</sup>Department of Chemistry and Chemical Biology  
Baker Laboratory  
Cornell University  
Ithaca, New York 14853*

| Section                                                                                                       | Page        |
|---------------------------------------------------------------------------------------------------------------|-------------|
| <b>Materials and Methods.</b>                                                                                 | <b>S-5</b>  |
| General Consideration                                                                                         | S-5         |
| Characterization and Physical Measurements                                                                    | S-6         |
| XAS Measurements                                                                                              | S-7         |
| <b>Ligand Syntheses.</b>                                                                                      | <b>S-9</b>  |
| $(^{Mes}dmx)H_2$ Synthesis                                                                                    | S-9         |
| Figure S-1. $^1H$ NMR spectrum of $(^{Mes}dmx)H_2$                                                            | S-10        |
| Figure S-2. $^{13}C\{^1H\}$ NMR spectrum of $(^{Mes}dmx)H_2$                                                  | S-10        |
| $(^{tBu}dmx)H_2$ Synthesis                                                                                    | S-11        |
| Figure S-3. $^1H$ NMR spectrum of $(^{tBu}dmx)H_2$                                                            | S-12        |
| Figure S-4. $^{13}C\{^1H\}$ NMR spectrum of $(^{tBu}dmx)H_2$                                                  | S-12        |
| <b>Metal Complex Syntheses.</b>                                                                               | <b>S-13</b> |
| $(^{Mes}dmx)Cu_2(NCMe)_2$ Synthesis (1)                                                                       | S-13        |
| Figure S-5. $^1H$ NMR spectrum of $(^{Mes}dmx)Cu_2(NCMe)_2$ (1)                                               | S-14        |
| Figure S-6. $^{13}C\{^1H\}$ NMR spectrum of $(^{Mes}dmx)Cu_2(NCMe)_2$ (1)                                     | S-14        |
| $(^{Mes}dmx)Cu_2(\mu^2-N(C_6H_4OMe))$ Synthesis (2)                                                           | S-15        |
| Figure S-7. $^1H$ NMR spectrum of $(^{Mes}dmx)Cu_2(\mu^2-N(C_6H_4OMe))$ (2)                                   | S-16        |
| Figure S-8. $^{13}C\{^1H\}$ NMR spectrum of $(^{Mes}dmx)Cu_2(\mu^2-N(C_6H_4OMe))$ (2)                         | S-16        |
| $(^{Mes}dmx)Cu_2(\mu^2-N(3,5-(F_3C)_2C_6H_3))$ Synthesis (3)                                                  | S-17        |
| Figure S-9. $^1H$ NMR spectrum of $(^{Mes}dmx)Cu_2(\mu^2-N(3,5-(F_3C)_2C_6H_3))$ (3)                          | S-18        |
| Figure S-10. $^{19}F$ NMR spectrum of $(^{Mes}dmx)Cu_2(\mu^2-N(3,5-(F_3C)_2C_6H_3))$ (3)                      | S-18        |
| $(^{tBu}dmx)K_2$ Synthesis (4)                                                                                | S-19        |
| $(^{tBu}dmx)Cu_2(\mu^2-N(C_6H_4OMe))$ Synthesis (5)                                                           | S-20        |
| Figure S-11. $^1H$ NMR spectrum of $(^{tBu}dmx)Cu_2(\mu^2-N(C_6H_4OMe))$ (5)                                  | S-21        |
| Figure S-12. $^{13}C\{^1H\}$ NMR spectrum of $(^{tBu}dmx)Cu_2(\mu^2-N(C_6H_4OMe))$ (5)                        | S-21        |
| $(^{tBu}dmx)Cu_2(\mu^2-N(3,5-(F_3C)_2C_6H_3))$ Synthesis (6)                                                  | S-22        |
| Figure S-13. $^1H$ NMR spectrum of $(^{tBu}dmx)Cu_2(\mu^2-N(3,5-(F_3C)_2C_6H_3))$ (6)                         | S-23        |
| Figure S-14. $^{19}F$ NMR spectrum of $(^{tBu}dmx)Cu_2(\mu^2-N(3,5-(F_3C)_2C_6H_3))$ (6)                      | S-23        |
| Figure S-15. $^{13}C\{^1H\}$ NMR spectrum of $(^{tBu}dmx)Cu_2(\mu^2-N(3,5-(F_3C)_2C_6H_3))$ (6)               | S-23        |
| $[K(C_{222})][(^{Mes}dmx)Cu_2(\mu^2-N(C_6H_4OMe))]$ Synthesis (7)                                             | S-24        |
| Figure S-16. $^1H$ NMR spectrum of $[K(C_{222})][(^{Mes}dmx)Cu_2(\mu^2-N(C_6H_4OMe))]$ (7)                    | S-25        |
| Figure S-17. Solution phase EPR spectrum of $[K(C_{222})][(^{Mes}dmx)Cu_2(\mu^2-N(C_6H_4OMe))]$ (7)           | S-26        |
| Figure S-18. Low Temperature EPR spectrum of $[K(C_{222})][(^{Mes}dmx)Cu_2(\mu^2-N(C_6H_4OMe))]$ (7)          | S-27        |
| Figure S-19. SOMO Population Plot of $[K(C_{222})][(^{Mes}dmx)Cu_2(\mu^2-N(C_6H_4OMe))]$ (7)                  | S-28        |
| $[K(C_{222})][(^{tBu}dmx)Cu_2(\mu^2-N(C_6H_4OMe))]$ Synthesis (8)                                             | S-29        |
| Figure S-20. $^1H$ NMR spectrum of $[K(C_{222})][(^{tBu}dmx)Cu_2(\mu^2-N(C_6H_4OMe))]$ (8)                    | S-30        |
| Figure S-21. Solution phase EPR spectrum of $[K(C_{222})][(^{tBu}dmx)Cu_2(\mu^2-N(C_6H_4OMe))]$ (8)           | S-31        |
| Figure S-22. Low temperature (4 K) EPR spectrum of $[K(C_{222})][(^{tBu}dmx)Cu_2(\mu^2-N(C_6H_4OMe))]$ (8)    | S-32        |
| $[K(C_{222})][(^{tBu}dmx)Cu_2(\mu^2-N(3,5-(F_3C)_2C_6H_3))]$ Synthesis (9)                                    | S-33        |
| Figure S-23. $^1H$ NMR spectrum of $[K(C_{222})][(^{tBu}dmx)Cu_2(\mu^2-N(3,5-(F_3C)_2C_6H_3))]$ (9)           | S-34        |
| Figure S-24. Solution phase EPR spectrum of $[K(C_{222})][(^{tBu}dmx)Cu_2(\mu^2-N(3,5-(F_3C)_2C_6H_3))]$ (9)  | S-35        |
| Figure S-25. Low temperature EPR spectrum of $[K(C_{222})][(^{tBu}dmx)Cu_2(\mu^2-N(3,5-(F_3C)_2C_6H_3))]$ (9) | S-36        |
| $(^{tBu}L)Cu(NCMe)$ Synthesis (10)                                                                            | S-37        |
| Figure S-26. $^1H$ NMR spectrum of $(^{tBu}L)Cu(NCMe)$ (10)                                                   | S-38        |
| Figure S-27. $^{13}C\{^1H\}$ NMR spectrum of $(^{tBu}L)Cu(NCMe)$ (10)                                         | S-38        |
| $[(^{tBu}L)CuCl]_2$ Synthesis (11)                                                                            | S-39        |
| Figure S-28. Low temperature (77 K) EPR spectrum of 11                                                        | S-40        |

|                                                                                                                        |             |
|------------------------------------------------------------------------------------------------------------------------|-------------|
| ( <sup>Mes</sup> dmx)Cu <sub>2</sub> (PMe <sub>3</sub> ) <sub>2</sub> Synthesis ( <b>12</b> )                          | S-41        |
| Figure S-29. <sup>1</sup> H NMR spectrum of <b>12</b>                                                                  | S-42        |
| Figure S-30. <sup>31</sup> P NMR spectrum of <b>12</b>                                                                 | S-42        |
| Figure S-31. <sup>13</sup> C{ <sup>1</sup> H} NMR spectrum of <b>12</b>                                                | S-42        |
| ( <sup><i>t</i>Bu</sup> dmx)Cu <sub>2</sub> (PPh <sub>3</sub> ) <sub>2</sub> Synthesis ( <b>13</b> )                   | S-43        |
| Figure S-32. <sup>1</sup> H NMR spectrum of <b>13</b>                                                                  | S-44        |
| Figure S-33. <sup>31</sup> P NMR spectrum of <b>13</b>                                                                 | S-44        |
| Figure S-34. <sup>13</sup> C{ <sup>1</sup> H} NMR spectrum of <b>13</b>                                                | S-44        |
| ( <sup>Mes</sup> dmx)Cu <sub>2</sub> (CN <sup><i>t</i>Bu</sup> ) <sub>2</sub> Synthesis ( <b>14</b> )                  | S-45        |
| Figure S-35. <sup>1</sup> H NMR spectrum of <b>14</b>                                                                  | S-46        |
| Figure S-36. <sup>13</sup> C{ <sup>1</sup> H} NMR spectrum of <b>14</b>                                                | S-46        |
| ( <sup><i>t</i>Bu</sup> dmx)Cu <sub>2</sub> (CN <sup><i>t</i>Bu</sup> ) <sub>2</sub> Synthesis ( <b>15</b> )           | S-47        |
| Figure S-37. <sup>1</sup> H NMR spectrum of <b>15</b>                                                                  | S-48        |
| Figure S-38. <sup>13</sup> C{ <sup>1</sup> H} NMR spectrum of <b>15</b>                                                | S-48        |
| ( <sup>Mes</sup> dmx)Cu <sub>2</sub> (dmap) <sub>2</sub> Synthesis ( <b>16</b> )                                       | S-49        |
| Figure S-39. <sup>1</sup> H NMR spectrum of <b>16</b>                                                                  | S-50        |
| Figure S-40. <sup>13</sup> C{ <sup>1</sup> H} NMR spectrum of <b>16</b>                                                | S-50        |
| Figure S-41. Solid-state structure of thermal degradation of <b>7</b> ( <b>17</b> )                                    | S-51        |
| Figure S-42. <sup>1</sup> H NMR spectrum of thermal degradation of <b>7</b> ( <b>17</b> )                              | S-52        |
| [( <sup><i>t</i>Bu</sup> L)Cu] <sub>2</sub> Synthesis ( <b>18</b> )                                                    | S-53        |
| Figure S-43. <sup>1</sup> H NMR spectrum of <b>18</b>                                                                  | S-54        |
| Figure S-44. <sup>13</sup> C{ <sup>1</sup> H} NMR spectrum of <b>18</b>                                                | S-54        |
| <b>Stoichiometric Reactions.</b>                                                                                       | <b>S-55</b> |
| Figure S-45. <sup>1</sup> H NMR spectra of PMe <sub>3</sub> reactivity with <b>2</b> and <b>3</b>                      | S-56        |
| Figure S-46 to S-52. Iminophosphine independent syntheses and characterization                                         | S-57        |
| Figure S-53. <sup>1</sup> H NMR spectra of CN <sup><i>t</i>Bu</sup> reactivity with <b>2</b> and <b>3</b>              | S-62        |
| Figure S-54. <sup>1</sup> H NMR spectra of DMAP reactivity with <b>2</b> and <b>3</b>                                  | S-63        |
| Figure S-55. <sup>1</sup> H NMR spectra of DMAP reactivity in the presence of weak C-H bonds for <b>2</b> and <b>3</b> | S-64        |
| Figure S-56. <sup>1</sup> H NMR spectra of PPh <sub>3</sub> reactivity with <b>5</b> and <b>6</b>                      | S-65        |
| Figure S-57. <sup>1</sup> H NMR spectra of CN <sup><i>t</i>Bu</sup> reactivity with <b>5</b> and <b>6</b>              | S-66        |
| <b>Further Spectroscopic Characterization.</b>                                                                         | <b>S-67</b> |
| Figure S-58. UV-vis spectrum of <b>5</b> , <b>6</b> , <b>8</b> , and <b>9</b>                                          | S-67        |
| Figure S-59. Variable temperature UV-vis spectrum of <b>8</b>                                                          | S-68        |
| Figure S-60. Near-IR spectrum of <b>5</b> , <b>6</b> , <b>8</b> , and <b>9</b>                                         | S-68        |
| Figure S-61. Cyclic voltammetry of <b>2</b> , <b>3</b> , <b>5</b> , and <b>6</b>                                       | S-70        |
| <b>X-Ray Absorption Spectroscopy (XAS) and TDDFT Plots.</b>                                                            | <b>S-71</b> |
| Figure S-62. Correlation of experimental Cu K-edge spectra and TDDFT of <b>10</b> and <b>11</b>                        | S-71        |
| Figure S-63. Comparison of experimental Cu K-edge spectra and TDDFT of <b>5</b> , <b>6</b> , <b>8</b> , and <b>9</b>   | S-72        |
| Figure S-64. Correlation of experimental N K-edge spectra and TDDFT of <b>10</b> and <b>11</b>                         | S-73        |
| Figure S-65. Comparison of experimental N K-edge spectra and TDDFT of <b>5</b> , <b>6</b> , <b>8</b> , and <b>9</b>    | S-74        |
| Figure S-66. Frontier molecular orbital diagram of <b>10</b>                                                           | S-75        |
| Figure S-67. Frontier molecular orbital diagram of <b>11</b>                                                           | S-76        |
| Figure S-68. Frontier molecular orbital diagram of <b>5</b> and <b>8</b>                                               | S-77        |
| Figure S-69. Frontier molecular orbital diagram of <b>6</b> and <b>9</b>                                               | S-79        |
| Figure S-70. TDDFT analysis of UV-vis/NIR spectra                                                                      | S-81        |
| Figure S-71. TDDFT transitions of orbitals most resembling IVCT                                                        | S-82        |
| Figure S-72. TDDFT orbital parentage                                                                                   | S-83        |
| Table S-1. TDDFT acceptor orbital parentage assignment and analysis                                                    | S-84        |

|                                                                                             |              |
|---------------------------------------------------------------------------------------------|--------------|
| <b>X-Ray Diffraction Details.</b>                                                           | <b>S-87</b>  |
| Table S-2. X-ray diffraction experimental details                                           | S-87         |
| X-ray diffraction techniques and refinement details                                         | S-90         |
| Figure S-73. Solid-state molecular structure for <b>1</b>                                   | S-95         |
| Figure S-74. Solid-state molecular structure for <b>2</b>                                   | S-96         |
| Figure S-75. Solid-state molecular structure for <b>3</b>                                   | S-97         |
| Figure S-76. Solid-state molecular structure for <b>5</b>                                   | S-98         |
| Figure S-77. Solid-state molecular structure for <b>6</b>                                   | S-99         |
| Figure S-78. Solid-state molecular structure for <b>7</b>                                   | S-100        |
| Figure S-79. Solid-state molecular structure for <b>8</b>                                   | S-101        |
| Figure S-80. Solid-state molecular structure for <b>9</b>                                   | S-102        |
| Figure S-81. Solid-state molecular structure for <b>10</b>                                  | S-103        |
| Figure S-82. Solid-state molecular structure for <b>11</b>                                  | S-104        |
| Figure S-83. Solid-state molecular structure for <b>12</b>                                  | S-105        |
| Figure S-84. Solid-state molecular structure for <b>13</b>                                  | S-106        |
| Figure S-85. Solid-state molecular structure for <b>14</b>                                  | S-107        |
| Figure S-86. Solid-state molecular structure for <b>15</b>                                  | S-108        |
| Figure S-87. Solid-state molecular structure for <b>16</b>                                  | S-109        |
| Figure S-88. Solid-state molecular structure for <b>18</b>                                  | S-110        |
| Table S-3. Pertinent bondmetrics for <b>1</b>                                               | S-111        |
| Table S-4. Pertinent bondmetrics for <b>2</b>                                               | S-111        |
| Table S-5. Pertinent bondmetrics for <b>3</b>                                               | S-111        |
| Table S-6. Pertinent bondmetrics for <b>5</b>                                               | S-111        |
| Table S-7. Pertinent bondmetrics for <b>6</b>                                               | S-112        |
| Table S-8. Pertinent bondmetrics for <b>7</b>                                               | S-112        |
| Table S-9. Pertinent bondmetrics for <b>8</b>                                               | S-112        |
| Table S-10. Pertinent bondmetrics for <b>9</b>                                              | S-112        |
| Table S-11. Pertinent bondmetrics for <b>10</b>                                             | S-113        |
| Table S-12. Pertinent bondmetrics for <b>11</b>                                             | S-113        |
| Table S-13. Pertinent bondmetrics for <b>12</b>                                             | S-113        |
| Table S-14. Pertinent bondmetrics for <b>13</b>                                             | S-113        |
| Table S-15. Pertinent bondmetrics for <b>14</b>                                             | S-113        |
| Table S-16. Pertinent bondmetrics for <b>15</b>                                             | S-114        |
| Table S-17. Pertinent bondmetrics for <b>16</b>                                             | S-114        |
| Table S-18. Pertinent bondmetrics for <b>18</b>                                             | S-114        |
| <b>Computational Protocol (DFT Calculations), Sample Input File, and Input Coordinates.</b> | <b>S-115</b> |
| Sample ORCA input file                                                                      | S-116        |
| ORCA Input Coordinates                                                                      | S-118        |
| <b>Respective Contributions.</b>                                                            | <b>S-135</b> |
| <b>References.</b>                                                                          | <b>S-136</b> |
| <b>CheckCIF Reports.</b>                                                                    | <b>S-139</b> |

## Materials and Methods.

**General Considerations.** All manipulations were carried out in the absence of water and dioxygen using standard Schlenk techniques or in an MBraun inert atmosphere drybox under a dinitrogen atmosphere, unless specified otherwise. All glassware was oven dried at 150 °C for a minimum of 12 h and cooled in an evacuated antechamber for a minimum of 15 minutes prior to use in the drybox. Benzene, diethyl ether, dichloromethane (DCM), acetonitrile (MeCN), hexanes, pentane, toluene, and tetrahydrofuran (THF) were dried over 4 Å molecular sieves (Strem) prior to use. When applicable, solvents were tested with a deep violet solution of sodium benzophenone ketyl in tetrahydrofuran (prepared by stirring 10 mg benzophenone in 10 mL THF with excess metallic sodium for 12 h) to confirm effective oxygen and moisture removal. Chloroform-*d*<sub>1</sub> was purchased from Cambridge Isotope Labs and stored over anhydrous potassium carbonate with exclusion of light. Benzene-*d*<sub>6</sub> and tetrahydrofuran-*d*<sub>8</sub> were purchased from Cambridge Isotope Labs, degassed, and stored over 4 Å molecular sieves prior to use. Reagents 2-Mesityl-1*H*-pyrrole,<sup>1</sup> 4,5-diformyl-9,9-dimethylxanthene,<sup>2</sup> 3,5-bis(trifluoromethyl) phenyl azide,<sup>3</sup> 4-methoxyphenyl azide,<sup>4</sup> Gomberg's dimer,<sup>5</sup> potassium graphite (KC<sub>8</sub>),<sup>6</sup> 2-azaadamantane-*N*-oxyl (AZADO)<sup>7</sup>, iodobenzene dichloride,<sup>8</sup> and (<sup>t</sup>BuL)H<sup>9</sup> were synthesized according to literature protocols. Mesitylcopper was prepared according to a literature protocol and recrystallized three times from slow cooling of a warm toluene solution, followed by a cold diethyl ether wash.<sup>10</sup> Reagents silver trifluoromethanesulfonate, copper bromide dimethyl sulfide complex, anhydrous cuprous chloride, *N,N*-dimethylaminopyridine (DMAP), 1,2-diphenylhydrazine, cryptand 222c (C<sub>222</sub>), and 2-hydroxy-2-azaadamantane (AZADOL) were purchased from Aldrich and used as received. Potassium bis(trimethylsilyl)amide was purchased from Aldrich and recrystallized from slow cooling of a warm toluene solution prior to use. Reagents styrene, 1,4-cyclohexadiene, *tert*-butyl isocyanide, trimethylphosphine, and pyridine were purchased from Aldrich and dried over molecular sieves prior to use. Celite® 545 (J. T. Baker) was dried in a Schlenk flask for 24 h under dynamic vacuum while heating to at least 150 °C prior to use in a drybox. Activated alumina was dried in a Schlenk flask for 48 h under dynamic vacuum at 200 °C prior to use in a drybox. Silica gel 32-63 μ (AIC, Framingham, MA) was used as received. Reactions involving heating solvents above their reported boiling point in a sealed Schlenk tube were conducted behind a blast shield. **Caution!** Organic azides are known to be potentially explosive compounds.<sup>11,12</sup> While we did not encounter any issues during their

synthesis, proper precautions were taken. All reactions involving organic azides at elevated temperatures were conducted behind a blast shield. All organic azides were stored under nitrogen in a  $-35\text{ }^{\circ}\text{C}$  freezer and filtered through silica prior to use.

**Characterization and Physical Measurements.**  $^1\text{H}$ ,  $^{13}\text{C}\{^1\text{H}\}$ ,  $^{31}\text{P}$ , and  $^{19}\text{F}$  NMR spectra were recorded on Varian Unity/Inova 400, 500, or 600 MHz spectrometers.  $^1\text{H}$  and  $^{13}\text{C}\{^1\text{H}\}$  NMR chemical shifts are reported relative to  $\text{SiMe}_4$  using the chemical shift of residual solvent peaks as reference.  $^{19}\text{F}$  NMR chemical shifts are reported relative to an external standard of neat  $\text{BF}_3(\text{OEt}_2)$  ( $\delta -153.00$  ppm).  $^{31}\text{P}$  NMR chemical shifts are referenced to an external standard of 85 %  $\text{H}_3\text{PO}_4$  ( $\delta 0.00$  ppm). Multiplicity assignments are abbreviated as follows: s = singlet, d = doublet, t = triplet, q = quartet, m = multiplet, br = broad, v. br = very broad.

UV/Visible/NIR spectra were recorded on a Varian Cary 50 UV/Vis spectrometer using air-free quartz cuvettes (0.10 mm path length) and a scan rate of 600 nm/min. Samples were prepared in the drybox using serial dilution with volumetric glassware to obtain accurate concentrations. Extinction coefficients were determined from a minimum of three concentrations per sample and were calculated by a linear regression fit of the absorbance vs. concentration data.

EPR spectra were obtained on a Bruker EleXsys E-500 CW-EPR spectrometer. Spectra containing *ca.* 5–10 mg sample were measured as frozen toluene glasses, frozen 2-methyltetrahydrofuran glasses, and/or in solution at a microwave power of 0.6325–2 mW. Effective *g*-values (*g*), *g*-strain ( $\sigma$ ), and hyperfine coupling constants (*A*) were obtained from spectral simulations of  $S = 1/2$  systems using the program SpinCount.

Cyclic voltammetry and differential pulse voltammetry measurements were performed with a CHI660d potentiostat using a three-electrode cell with a glassy carbon working electrode, a platinum wire as the counter electrode, and a  $\text{Ag}/\text{AgNO}_3$  reference electrode. All of the potentials are referenced to the  $[\text{Cp}_2\text{Fe}]^{+/0}$  couple. Saturated tetrabutylammonium hexafluorophosphate ( $\text{TBAPF}_6$ ) solutions of 0.2 M in tetrahydrofuran were prepared before each experiment. All measurements were conducted under a dinitrogen atmosphere. No background reaction upon addition of excess  $\text{TBAPF}_6$  in tetrahydrofuran was observed for all complexes.

Elemental analysis (%CHN) was conducted at Harvard University on a PerkinElmer 2400 Series II CHNS/O Analyzer using bulk recrystallized compounds. In several cases, satisfactory elemental analyses were obtained by considering the presence of solvent molecules

intercalated within the unit cell as ascertained by single-crystal X-ray diffraction and  $^1\text{H}$  NMR spectroscopy.

**XAS Data Collection.** All data were measured at the Stanford Synchrotron Radiation Lightsource (SSRL) under ring conditions of 3.0 GeV and 500 mA. All samples were prepared in an inert-atmosphere glovebox and were measured as solids. For Cu K-edge measurements, samples were ground with BN to a final concentration of 10 weight % Cu, pressed into 1 mm aluminum spacers and sealed with 37  $\mu\text{m}$  Kapton tape. For Cu L-edge and N K-edge measurements, samples were ground to a fine powder and spread in a thin layer on carbon tape affixed to an Al sample rod. Cu K-edge measurements were collected using beam line 7-3. Samples were maintained at 10 K in a liquid He cryostat during data collection. Spectra were collected in transmission mode, with X-rays detected by ionization chambers immediately downstream and upstream of the sample. A Cu foil and a third ionization chamber upstream of the sample were used for internal energy calibration, setting the first inflection point of the Cu foil scan to 8980.3 eV. Data were collected from 8660.0 to 9380.0 eV. Three scans of each sample were collected and averaged. Spectra were processed using Sixpack and Igor Pro. The region below 8960 eV was used to fit a linear background, while the region above 9010 eV was flattened with a piecewise spline and set to an average intensity of unity. Cu  $L_{2,3}$ -edge XAS measurements were collected on the 31-pole wiggler beam line 10-1 with a 1000 lines/mm spherical grating monochromator and 29  $\mu\text{m}$  entrance and exit slits. Data were measured by monitoring the change in sample current through detection of the total electron yield (TEY). The drain current was normalized to incident photon flux with a gold-grid reference monitor. Incident beam energy was calibrated to the  $L_3$  edge position at 930.65 eV of a  $(\text{nmph})_2[\text{CuCl}_4]$  (nmph = *N*-methylphenethylammonium) standard spectra collected before and after each sample.<sup>13</sup> Samples were maintained at room temperature under an ultra-high vacuum ( $10^{-9}$  Torr) during collection. Data were collected from 910.0 to 990.0 eV. Four scans were measured and averaged for each compound. Processing was done using PyMCA . Background subtraction was achieved by fitting a line to the pre-edge region below 925.0 eV and subtracting from the entire spectrum. The post edge region from 975.0 eV to 990.0 eV was fit to a line and normalized to 1.0. The edge jumps at  $L_3$  and  $L_2$  were subtracted using a statistics-sensitive non-linear iterative peak-clipping algorithm (SNIP)<sup>14</sup> as implemented in PyMCA. Data were processed with Igor 6.37. N K-edge XAS measurements were collected on the 31-pole wiggler beam line 10-1 with a 600

lines/mm spherical grating monochromator and 20  $\mu\text{m}$  entrance and exit slits. Data were measured by monitoring the change in sample current through detection of the total electron yield (TEY). The drain current was normalized to incident photon flux with a gold-grid reference monitor. Incident beam energy was calibrated by comparison of the Ni L<sub>3</sub> second order transition at 426.35 eV in a reference sample placed upstream of the sample chamber. Samples were maintained at room temperature under an ultra-high vacuum ( $10^{-9}$  Torr) during collection. Data were collected from 380.0 to 450.0 eV. Seven scans were measured and averaged for each compound. Processing was done using PyMCA. Background subtraction was achieved by fitting a line to the pre-edge region below 395.0 eV and subtracting from the entire spectrum. The post edge region above 410.0 eV was fit to a flattened polynomial and normalized to 1.0.



## Ligand Syntheses.

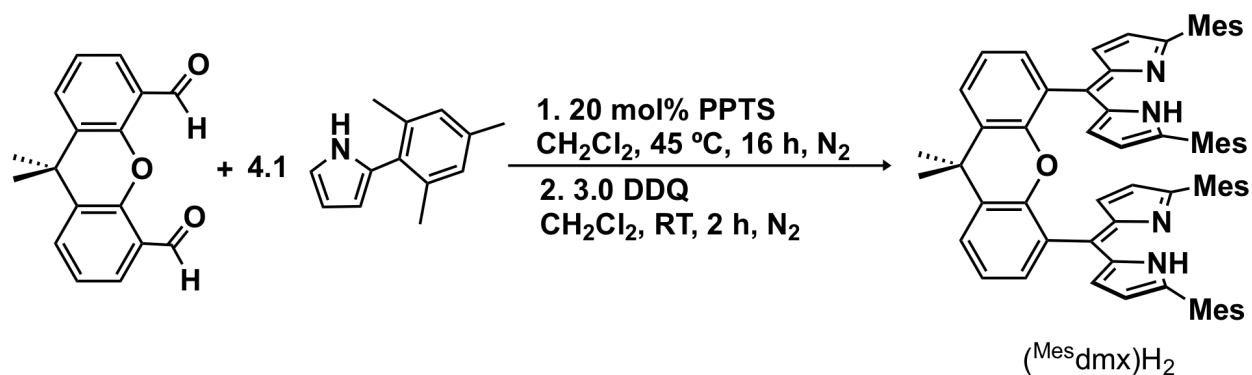

$(^{\text{Mes}}\text{dmx})\text{H}_2$ . In the drybox, 2-mesityl-1H-pyrrole<sup>1</sup> (8.6 g, 0.046 mol, 4.1 equiv.) and 4,5-diformyl-9,9-dimethylxanthene<sup>2</sup> (3.0 g, 0.011 mol, 1.0 equiv.) were dissolved in dichloromethane (60 mL), followed by addition of pyridinium *p*-toluenesulfonate (PPTS; 0.57 g, 2.3 mmol, 0.2 equiv.). The mixture was loaded into a pressure vessel, removed from the drybox, and heated to 45 °C for 16 h during which a gradual color change from off-yellow to deep red-orange was noted. The mixture was cooled to room temperature, exposed to air, and filtered through a plug of silica on top of a coarse porosity frit, followed by extensive rinsing with dichloromethane (500 mL) until the eluant became colorless. Solvent was removed *in vacuo* to afford a flocculent peach solid, which was subsequently dissolved in anhydrous dichloromethane (300 mL). Under an atmosphere of nitrogen, 2,3-dichloro-5,6-dicyano-1,4-benzoquinone (DDQ; 7.70 g, 0.034 mol, 3.0 equiv.) was added as a solid, resulting in an immediate color change to purple-red. After 2 h, the solution was concentrated *in vacuo* and filtered through a plug of basic alumina with dichloromethane/triethylamine (99:1) as the eluant, collecting the rapidly eluting red-orange fraction. Removal of solvent *in vacuo* followed by trituration of the solid in methanol and isolation by filtration with cold methanol afforded  $(^{\text{Mes}}\text{dmx})\text{H}_2$  (8.6 g, 79 %) as a red-orange powder. <sup>1</sup>H NMR (400 MHz,  $\text{CDCl}_3$ ):  $\delta$  12.44 (br, 2H, dipyrin N-H), 7.56 (dd,  $J = 7.8, 1.6$  Hz, 2H, xanthene C-H), 7.25 – 7.30 (m, 2H, xanthene C-H), 7.15 (t,  $J = 7.6$  Hz, 2H, xanthene C-H), 6.69 (s, 8H, mesityl aryl C-H), 6.30 (dd,  $J = 4.1, 1.0$  Hz, 4H, dipyrin C-H), 6.01 (dd,  $J = 4.1, 1.0$  Hz, 4H, dipyrin C-H), 2.26 (s, 12H, mesityl para-methyl C-H), 1.95 (s, 24H, mesityl ortho-methyl C-H), 1.82 (s, 6 H, xanthene methyl C-H). <sup>13</sup>C NMR (125 MHz,  $\text{C}_6\text{D}_6$ ):  $\delta$  153.98, 148.96, 141.20, 136.72, 136.64, 135.10, 131.47, 131.02, 120.18, 128.54, 126.98, 125.94, 125.69, 122.02, 119.48, 34.45, 31.61, 20.85, 20.73. HRMS (ESI<sup>+</sup>)  $m/z$  Calc. 966.5237 [ $\text{C}_{69}\text{H}_{65}\text{N}_4\text{O} + \text{H}^+$ ], Found 966.5377 [ $\text{M} + \text{H}$ ]<sup>+</sup>.

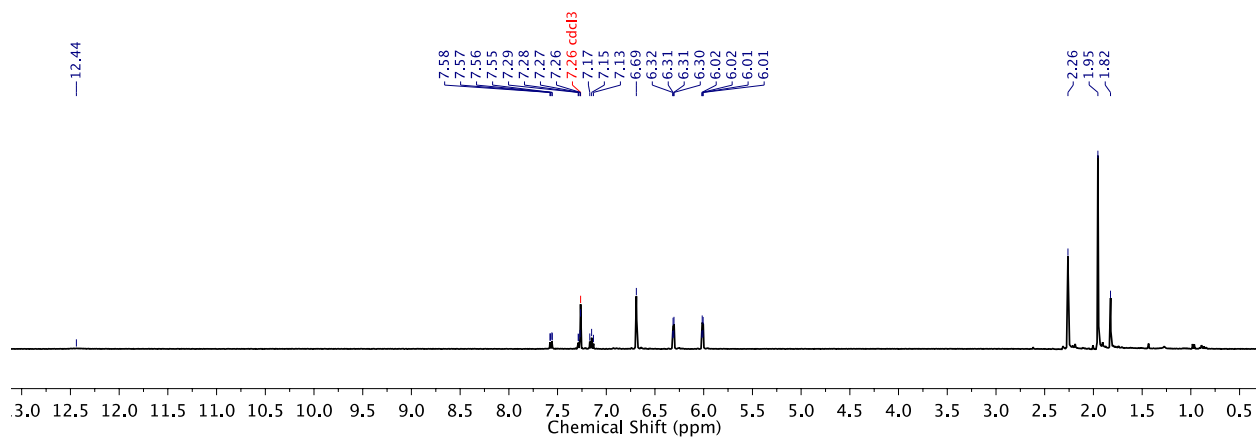

Figure S-1.  $^1\text{H}$  NMR spectrum of  $(^{\text{Mes}}\text{dmx})\text{H}_2$  (600 MHz,  $\text{CDCl}_3$ ).

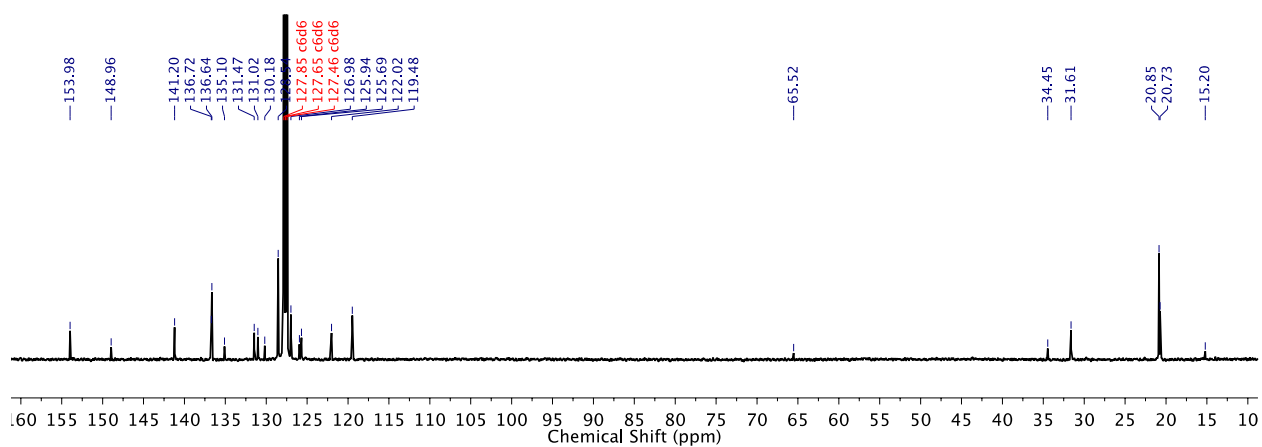

Figure S-2.  $^{13}\text{C}$  NMR spectrum of  $(^{\text{Mes}}\text{dmx})\text{H}_2$  (125 MHz,  $\text{C}_6\text{D}_6$ ).

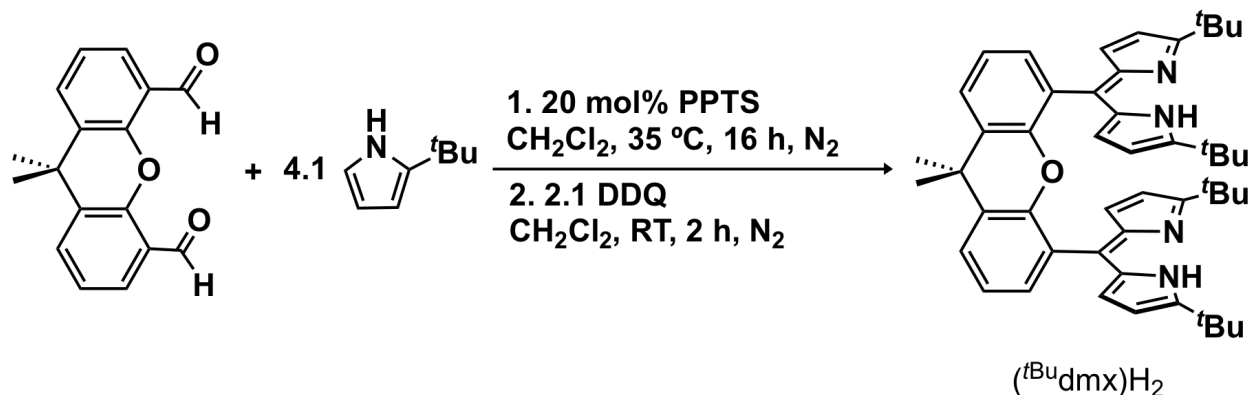

$({}^t\text{Bu}dmx)H_2$ . Adapting from a literature procedure,<sup>15</sup> in the drybox, crystalline 2-(*tert*-butyl)-1*H*-pyrrole<sup>16</sup> (5.25 g, 0.041 mol, 4.1 equiv.) and 4,5-diformyl-9,9-dimethylxanthene<sup>2</sup> (2.77 g, 0.010 mol, 1.0 equiv.) were dissolved in dichloromethane (70 mL), followed by addition of pyridinium *p*-toluenesulfonate (PPTS; 0.53 g, 2.11 mmol, 0.2 equiv.). The mixture was loaded into a pressure vessel, removed from the drybox, and heated to 35 °C with exclusion of light for 16 h during which a gradual color change from faint orange to deep red-orange was noted. The mixture was cooled to room temperature, exposed to air, and filtered through a plug of silica on top of a coarse porosity frit, followed by extensive rinsing with dichloromethane (500 mL) until the eluant became colorless. Solvent was removed *in vacuo* to afford a flocculent light yellow solid, which was subsequently dissolved in anhydrous dichloromethane (300 mL). Under an atmosphere of nitrogen, 2,3-dichloro-5,6-dicyano-1,4-benzoquinone (DDQ; 4.95 g, 0.021 mol, 2.1 equiv.) was added as a solid, resulting in an immediate color change from red-orange to purple-red with visible precipitant. After 2 h, the solution was quenched with 1.0 M NaOH (100 mL), following by extraction and dessication of the organic phase with brine and magnesium sulfate. After filtration, the solution was concentrated *in vacuo* and filtered through a plug of basic alumina, eluting slowly with dichloromethane/triethylamine (99:1). The first (*bright orange*) and second (*dark red*) fractions were together collected and triturated three times in methanol to remove residual triethylamine. The resulting bright orange solid was suspended in minimal methanol and held at -20 °C for two hours, following by collection of the orange solid by filtration. After rinsing with thawing methanol (2 x 50 mL), the bright orange solid was suspended in boiling methanol (*ca.* 250 mL), to which dichloromethane (*ca.* 40 mL) was added until the solution became homogeneous. The mixture was allowed to cool to room temperature and held at -20 °C for 48 h. Subsequent isolation by filtration afforded  $({}^t\text{Bu}dmx)H_2$  (8.40 g, 51 %) as a thin orange needles. <sup>1</sup>H NMR (500 MHz, C<sub>6</sub>D<sub>6</sub>): δ 13.25 (br, 2*H*, dipyrin N-*H*), 7.17 (dd, *J*

= 7.9, 1.6 Hz, 2H, xanthene C–H), 7.09 (dd,  $J = 7.5, 1.6$  Hz, 2H, xanthene C–H), 6.79 (t,  $J = 15.3$  Hz, 2H, xanthene C–H), 6.54 (dd,  $J = 4.1, 0.8$  Hz, 4H, dipyrin C–H), 6.07 (dd,  $J = 4.1, 1.2$  Hz, 4H, dipyrin C–H), 1.50 (s, 9H, xanthene methyl C–H), 1.40 (s, 36H, *tert*-butyl C–H).  $^{13}\text{C}$  NMR (125 MHz,  $\text{C}_6\text{D}_6$ ):  $\delta$  165.05, 148.87, 140.28, 135.09, 132.40, 130.43, 128.59, 128.35, 126.51, 126.21, 122.40, 113.61, 34.69, 33.48, 32.29, 30.21. HRMS (ESI+)  $m/z$  Calc. 719.4689 [ $\text{C}_{49}\text{H}_{58}\text{N}_4\text{O} + \text{H}^+$ ], Found 719.4718 [ $\text{M} + \text{H}^+$ ].

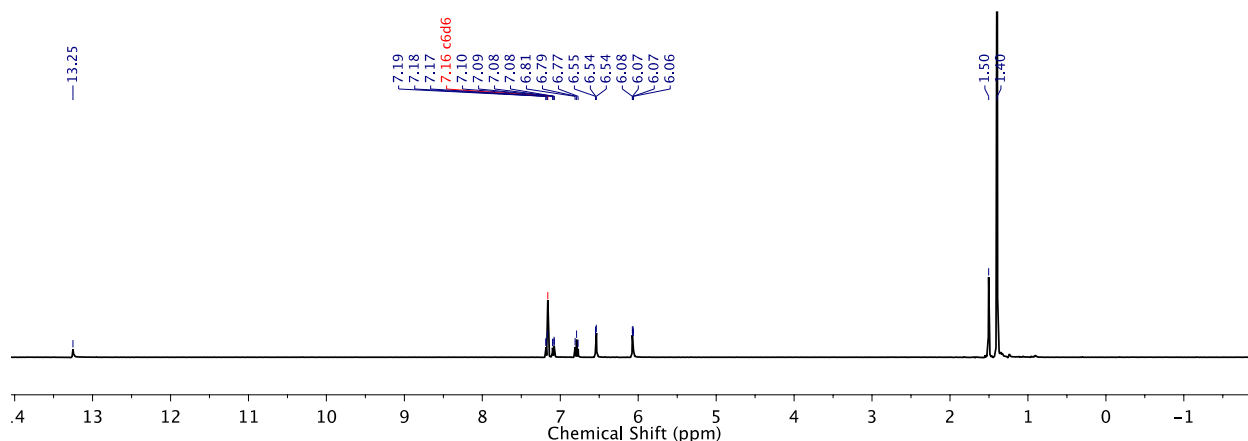

**Figure S–3.**  $^1\text{H}$  NMR spectrum of ( $t\text{Bu dmx}$ ) $\text{H}_2$  (600 MHz,  $\text{C}_6\text{D}_6$ ).

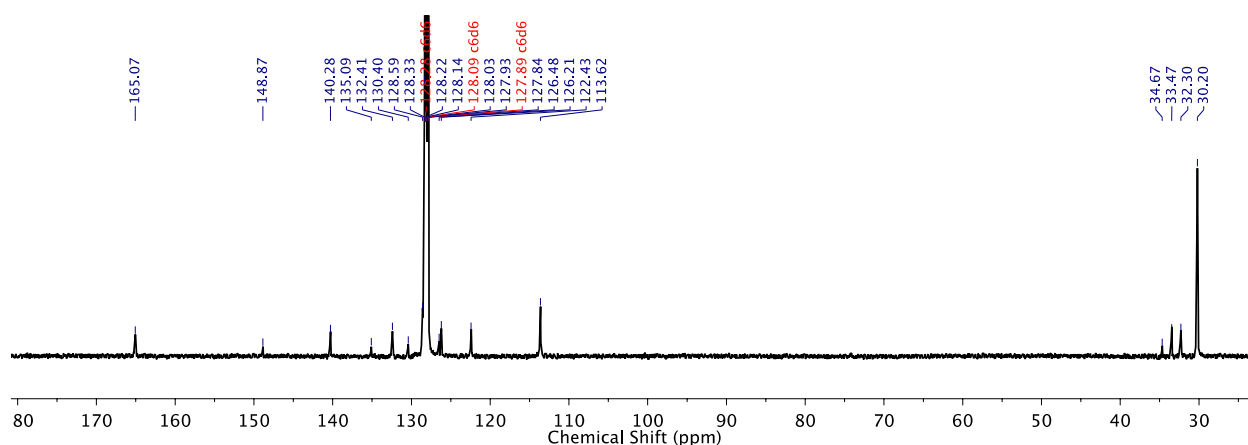

**Figure S–4.**  $^{13}\text{C}$  NMR spectrum of ( $t\text{Bu dmx}$ ) $\text{H}_2$  (125 MHz,  $\text{C}_6\text{D}_6$ ).

## Metal Complex Syntheses.

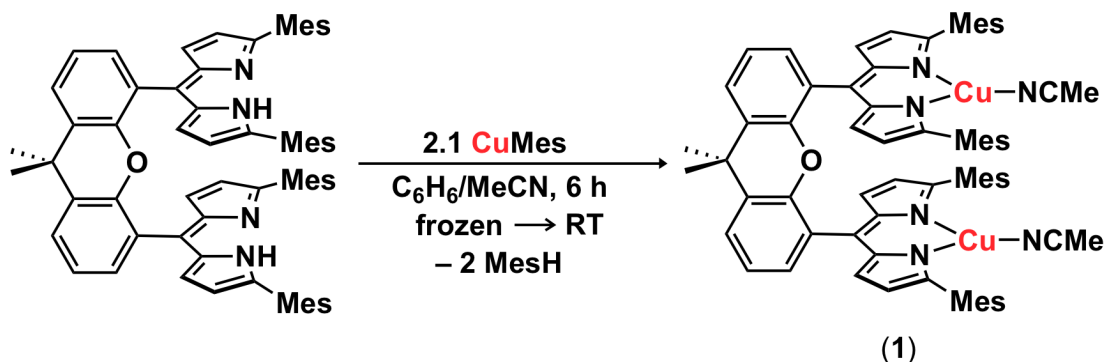

$(^{\text{Mes}}\text{dmx})\text{Cu}_2(\text{NCMe})_2$  (**1**). In the drybox, to a thawing benzene solution (20 mL) of  $(^{\text{Mes}}\text{dmx})\text{H}_2$  (0.710 g, 0.734 mmol, 1.0 equiv.) in benzene (5 mL) was added a thawed solution of mesitylcopper<sup>10</sup> ( $\text{CuMes}$ ; 0.282 g, 1.54 mmol, 2.1 equiv.) in a benzene/acetonitrile mixture (5 mL  $\text{C}_6\text{H}_6$ , 0.25 mL  $\text{CH}_3\text{CN}$ ). Over the course of 6 h, the reaction gradually thickened and changed color from red-orange to red-pink. The reaction was lyophilized, followed by an additional lyophilization to remove residual mesitylene. The red-pink powder was suspended in acetonitrile (5 mL) and stirred rapidly for 2 h. The slurry was placed in a  $-35^\circ\text{C}$  freezer for 1 h and subsequently filtered over a pad of Celite on top of a coarse porosity frit. The red solid was rinsed with cold acetonitrile (3 x 5 mL) and cold pentane (10 mL). The remaining solid was eluted with warm benzene and lyophilized to afford  $(^{\text{Mes}}\text{dmx})\text{Cu}_2(\text{NCMe})_2$  (**1**) as a red solid (0.710 g, 82 %). Single crystals of **1** suitable for X-ray diffraction were obtained by layering acetonitrile with a diethyl ether solution of **1** at  $-35^\circ\text{C}$  overnight.  $^1\text{H}$  NMR (600 MHz,  $\text{C}_6\text{D}_6$ ):  $\delta$  7.35 (d,  $J = 7.4$  Hz, 2H, dipyrroin C–H),  $\delta$  7.26 (d,  $J = 7.4$  Hz, 2H, dipyrroin C–H), 6.83 – 6.84 (m, 6H, xanthene C–H), 6.74 – 6.77 (d,  $J = 17.4$  Hz, 8H, mesityl aryl C–H), 6.31 (d,  $J = 4.0$  Hz, 4H, dipyrroin C–H), 2.37 (d,  $J = 11.5$  Hz, 24H, mesityl ortho-methyl C–H), 2.10 (s, 12H mesityl para-methyl C–H), 1.61 (s, 6H, xanthene methyl C–H), 0.40 (s, 6 H, acetonitrile C–H).  $^{13}\text{C}$  NMR (125 MHz,  $\text{C}_6\text{D}_6$ ):  $\delta$  143.15, 141.22, 138.23, 137.44, 136.19, 135.02, 132.72, 131.27, 130.37, 129.42, 128.10, 127.85, 127.29, 124.50, 121.23, 117.78, 114.143, 34.49, 31.17, 21.91, 21.33, 20.83. Calculated for  $\text{C}_{73}\text{H}_{70}\text{Cu}_2\text{N}_6\text{O}$ : C 74.65 H 6.01 N 7.16; Found: C 74.26 H 5.76 N 7.16.

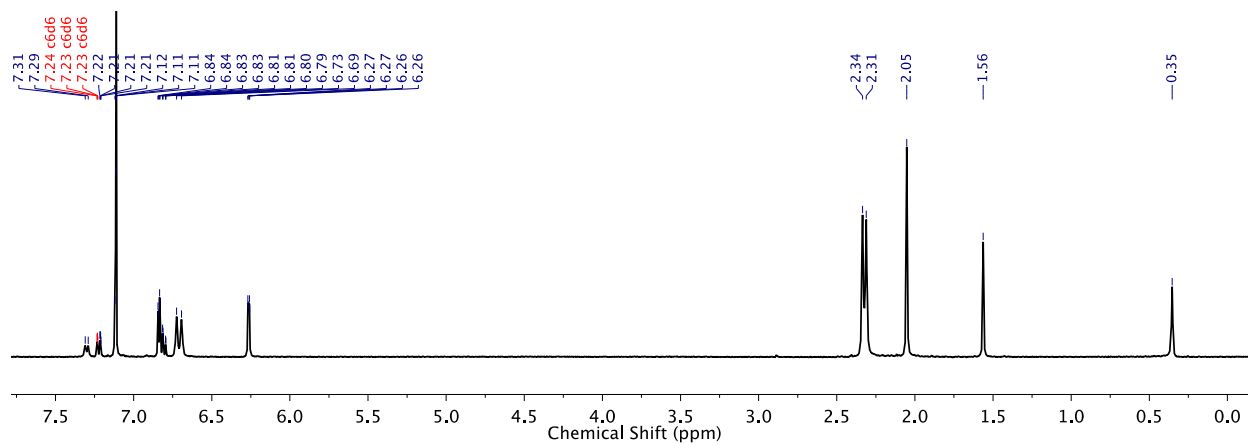

**Figure S-5.**  $^1\text{H}$  NMR spectrum of  $(^{\text{Mes}}\text{dmx})\text{Cu}_2(\text{NCMe})_2$  (**1**), (600 MHz,  $\text{C}_6\text{D}_6$ ).

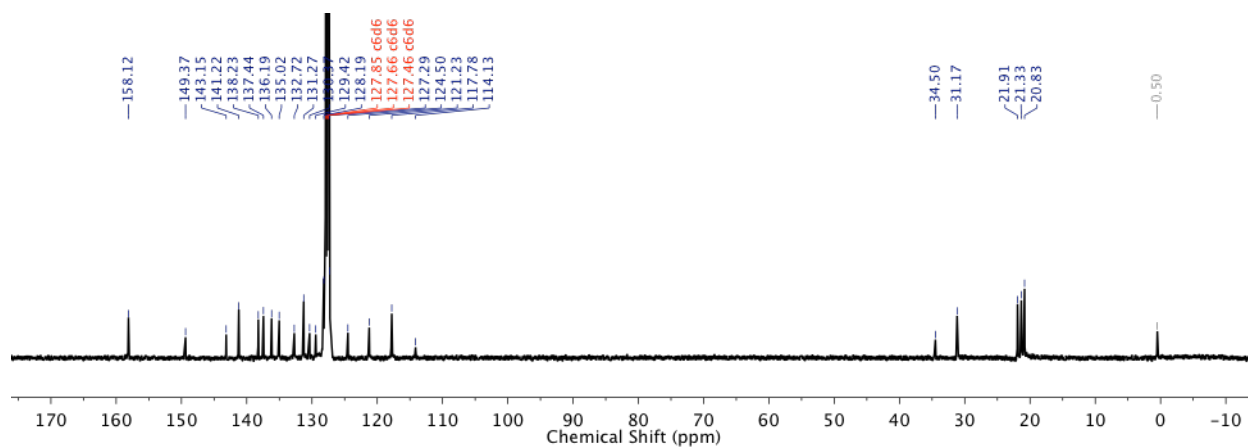

**Figure S-6.**  $^{13}\text{C}$  NMR spectrum of  $(^{\text{Mes}}\text{dmx})\text{Cu}_2(\text{NCMe})_2$  (**1**), (125 MHz,  $\text{C}_6\text{D}_6$ ).

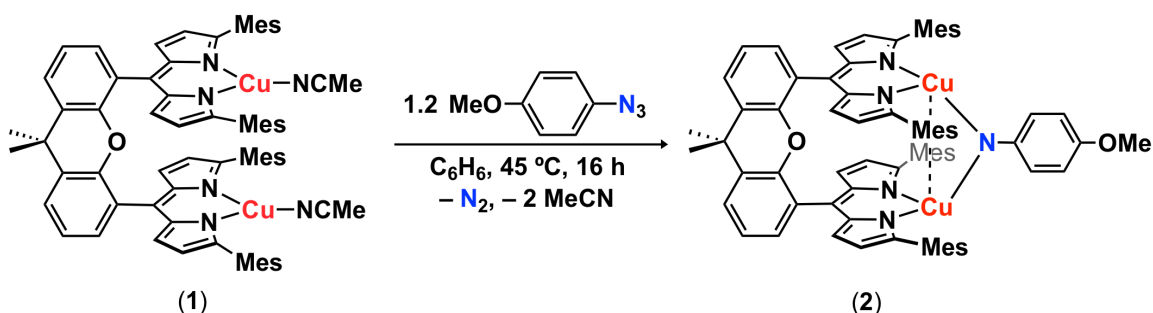

(<sup>Mes</sup>dmx)Cu<sub>2</sub>(μ<sup>2</sup>-N(C<sub>6</sub>H<sub>4</sub>OMe)) (**2**). In the drybox, to a Schlenk tube charged with a benzene solution (5 mL) of **1** (0.25 g, 0.22 mmol, 1.0 equiv.) was added a benzene solution (5 mL) of 4-methoxyphenyl azide<sup>4</sup> (0.04 g, 0.26 mmol, 1.2 equiv.). The Schlenk tube was sealed, removed from the drybox, and heated to 45 °C for 16 h, during which a color change from red-pink to deep violet was noted, and precipitate formed. The reaction was returned into the drybox and lyophilized. The residual powder was slurried in diethyl ether for 1 h and filtered over a pad of Celite on top of a coarse porosity frit. The residual powder was rinsed with a copious volume of diethyl ether (*ca.* 10 mL) and acetonitrile (*ca.* 5 mL) until the washings were faint purple. The product was eluted with boiling tetrahydrofuran (*ca.* 3 mL) to afford (<sup>Mes</sup>dmx)Cu<sub>2</sub>(μ<sup>2</sup>-N(C<sub>6</sub>H<sub>4</sub>OMe)) (**2**) as a deep violet solid (0.24 g, 92 %). Single crystals of **2** suitable for X-ray diffraction were obtained by allowing diethyl ether to diffuse into a dichloromethane solution of **2** at -35 °C over several days. <sup>1</sup>H NMR (600 MHz, C<sub>6</sub>D<sub>6</sub>): δ 7.74 (dd, *J* = 10.2, 2.1 Hz, 2*H*, aryl imide C-H), 7.30 (dd, *J* = 7.4, 1.5 Hz, 2*H*, dipyrin C-H), 7.21 (dd, *J* = 7.9, 1.6 Hz, 2*H*, dipyrin C-H), 6.99 (br, 4*H*, mesityl aryl C-H), 6.83 – 6.89 (m, 6*H*, xanthene C-H), 6.31 (d, *J* = 4.0 Hz, 4*H*, dipyrin C-H), δ 6.27 (br, 4*H*, mesityl aryl C-H), 6.06 (dd, *J* = 10.3, 2.1 Hz, 2*H*, aryl imide C-H), 3.06 (s, 3*H*, imide methoxy C-H), 2.73 (br, 24 *H*, mesityl ortho-methyl C-H), 2.06 (s, 12*H* mesityl para-methyl C-H), 1.55 (s, 6*H*, xanthene methyl C-H). <sup>13</sup>C NMR (125 MHz, C<sub>6</sub>D<sub>6</sub>): δ 161.50, 159.14, 149.25, 143.05, 140.86, 137.24, 137.09, 136.12, 135.21, 133.64, 130.75, 129.84, 128.94, 127.46, 126.74, 121.58, 115.73, 54.79, 34.24, 33.35, 20.77. Calculated for C<sub>76</sub>H<sub>71</sub>Cu<sub>2</sub>N<sub>5</sub>O<sub>2</sub>•CH<sub>3</sub>CH<sub>2</sub>OCH<sub>2</sub>CH<sub>3</sub>: C 74.62 H 6.34 N 5.44; Found: C 74.64 H 6.22 N 5.46 (one molecule of diethyl ether is present from bulk recrystallization).

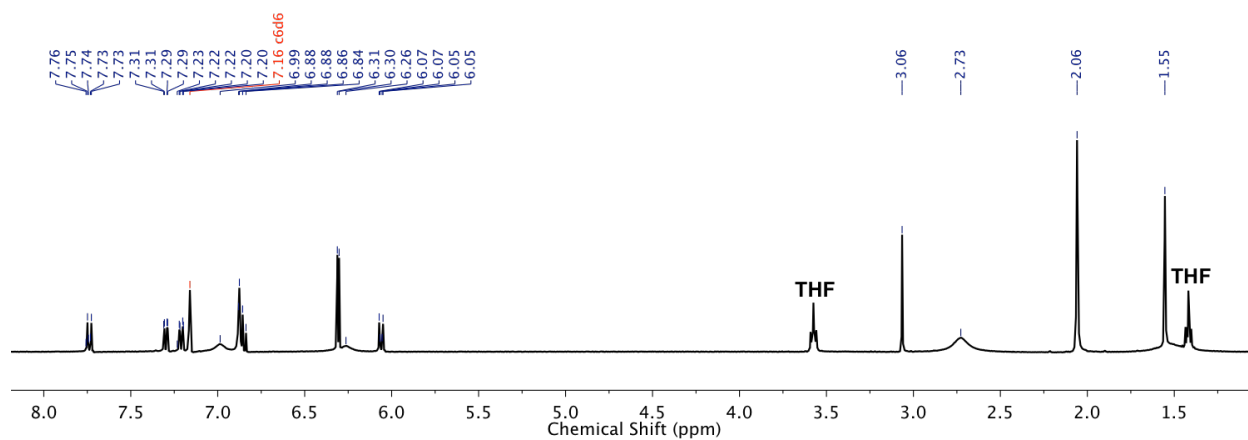

**Figure S-7.**  $^1\text{H}$  NMR spectrum of  $(^{\text{Mes}}\text{dmx})\text{Cu}_2(\mu^2\text{-N}(\text{C}_6\text{H}_4\text{OMe}))$  (**2**), (600 MHz,  $\text{C}_6\text{D}_6$ ).

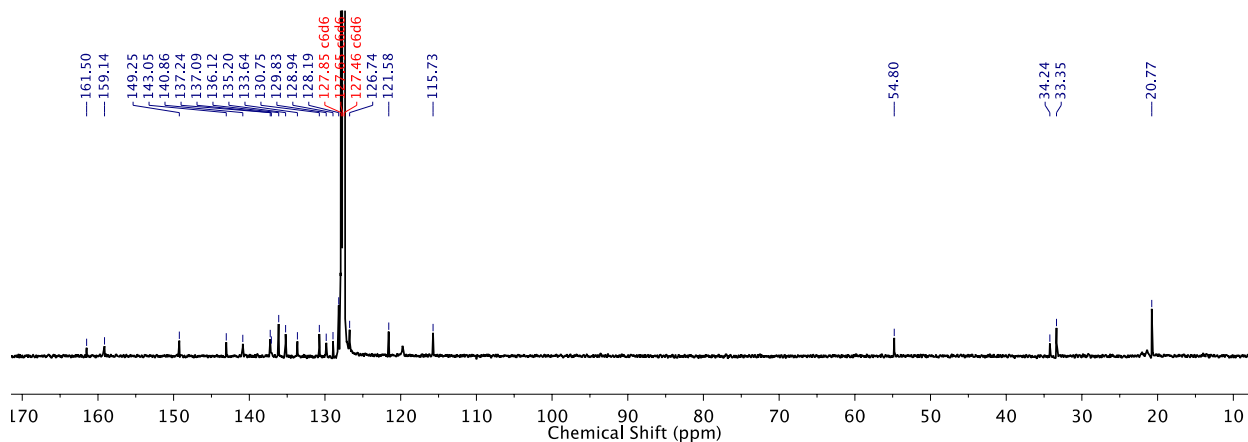

**Figure S-8.**  $^{13}\text{C}$  NMR spectrum of  $(^{\text{Mes}}\text{dmx})\text{Cu}_2(\mu^2\text{-N}(\text{C}_6\text{H}_4\text{OMe}))$  (**2**), (125 MHz,  $\text{C}_6\text{D}_6$ ).



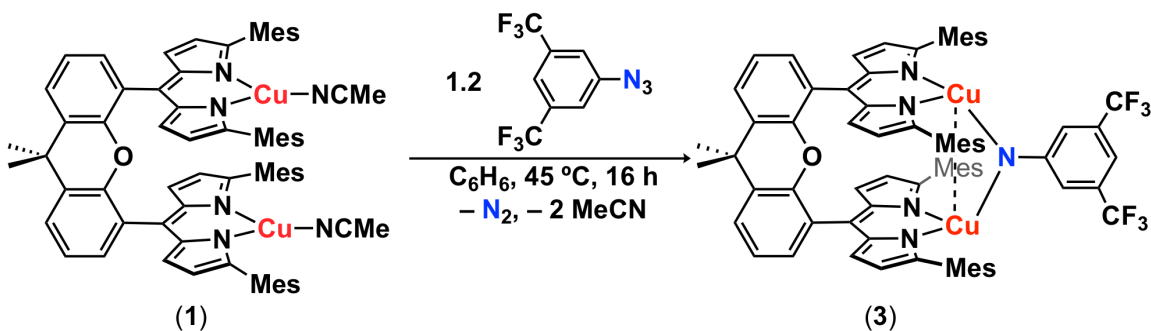

(<sup>Mes</sup>dmx)Cu<sub>2</sub>(μ<sup>2</sup>-N(3,5-(F<sub>3</sub>C)<sub>2</sub>C<sub>6</sub>H<sub>3</sub>)) (**3**). In the drybox, to a Schlenk tube charged with a benzene solution (10 mL) of **1** (0.20 g, 0.17 mmol, 1.0 equiv) was added a benzene solution (5 mL) of 3,5-bis(trifluoromethyl)phenyl azide<sup>3</sup> (0.05 g, 0.21 mmol, 1.2 equiv). The Schlenk tube was sealed, removed from the drybox, and heated to 45 °C for 16 h, during which a color change from magenta to pink-purple was noted. The reaction was returned into the drybox and lyophilized. The residual powder was slurried in minimal acetonitrile for 2 h and placed in a -35 °C freezer for 2 h, then filtered over a pad of Celite on top of a coarse porosity frit. The residual powder was rinsed with a copious volume of thawing acetonitrile (*ca.* 10 mL) until the washings were faint pink. The product was eluted with benzene and lyophilized to afford (<sup>Mes</sup>dmx)Cu<sub>2</sub>(μ<sup>2</sup>-N(3,5-(F<sub>3</sub>C)<sub>2</sub>C<sub>6</sub>H<sub>3</sub>)) (**3**) as a dark purple solid (0.16 g, 79 %). Single crystals of **3** suitable for X-ray diffraction were obtained by layering acetonitrile with a diethyl solution of **1** at -35 °C overnight. <sup>1</sup>H NMR (600 MHz, C<sub>6</sub>D<sub>6</sub>): δ 8.26 (s, 2 H, aryl imide C-H), 8.01 (s, 1H, aryl imide C-H), 7.18 – 7.21 (m, 4H, dipyrin C-H), 7.00 (br, 8H, mesityl aryl C-H), 6.85 (t, *J* = 7.6 Hz, 6H, xanthene C-H), 6.20 (d, *J* = 4.0 Hz, 4H, dipyrin C-H), 2.76 (br, 24H, mesityl ortho-methyl C-H), 2.08 (s, 12 H, mesityl para-methyl C-H), 1.55 (s, 6H, xanthene methyl C-H), <sup>19</sup>F NMR (470 MHz, C<sub>6</sub>D<sub>6</sub>): δ -62.8 (s, aryl imide CF<sub>3</sub>). <sup>13</sup>C NMR (125 MHz, CD<sub>2</sub>Cl<sub>2</sub>): δ 148.95, 142.74, 139.63, 137.20, 132.33, 130.93, 130.50, 129.34, 128.22, 127.22, 126.40, 121.82, 119.87, 118.45, 67.70, 34.58, 33.60, 31.56, 25.54, 22.62, 20.37, 13.84. Calculated for C<sub>77</sub>H<sub>67</sub>Cu<sub>2</sub>F<sub>6</sub>N<sub>5</sub>O: C 70.09 H 5.12 N 5.31; Found: C 69.73 H 5.14 N 5.65.

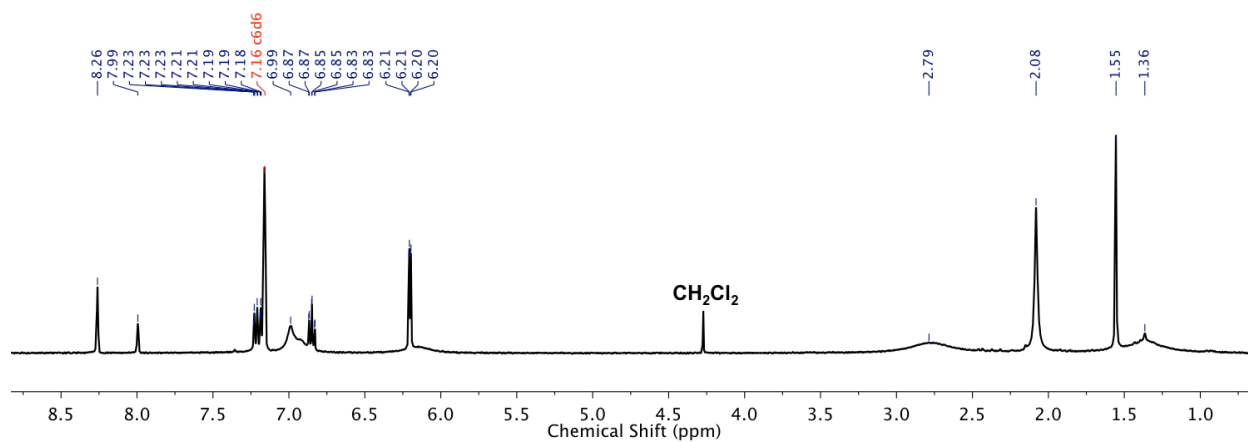

**Figure S-9.**  $^1\text{H}$  NMR spectrum of  $(^{\text{Mes}}\text{dmx})\text{Cu}_2(\mu^2\text{-N}(3,5\text{-(F}_3\text{C)}_2\text{C}_6\text{H}_3))$  (**3**), (600 MHz,  $\text{C}_6\text{D}_6$ ).

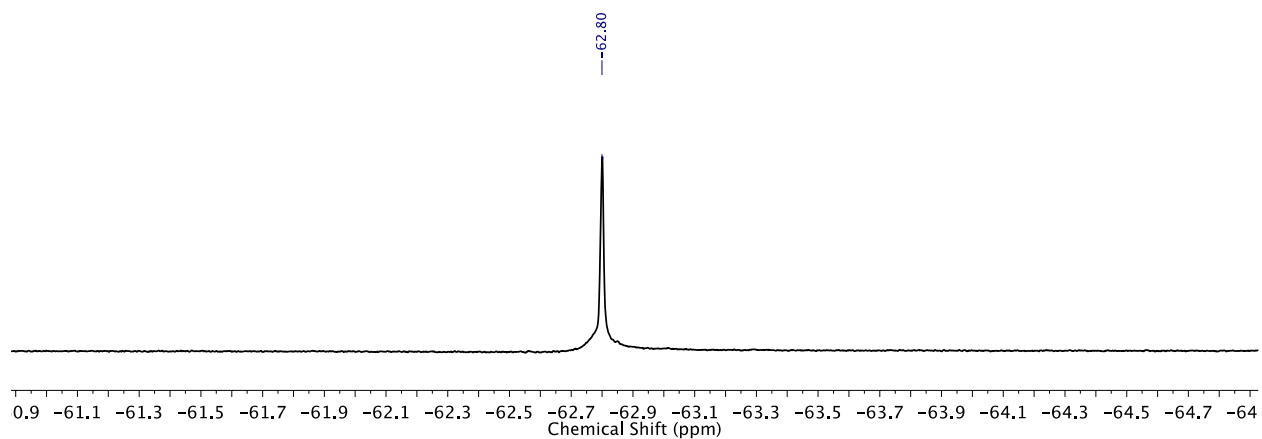

**Figure S-10.**  $^{19}\text{F}$  NMR spectrum of  $(^{\text{Mes}}\text{dmx})\text{Cu}_2(\mu^2\text{-N}(3,5\text{-(F}_3\text{C)}_2\text{C}_6\text{H}_3))$  (**3**), (375 MHz,  $\text{C}_6\text{D}_6$ ).

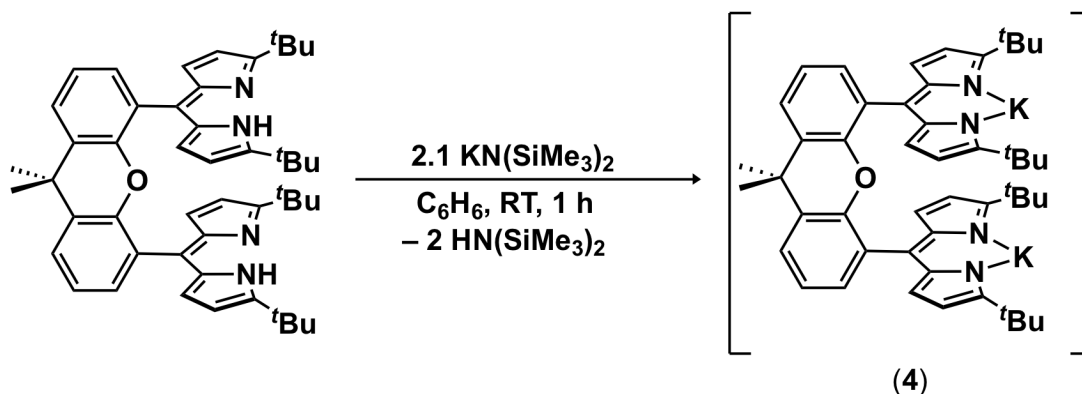

**(<sup>t</sup>Bu<sub>2</sub>dmx)K<sub>2</sub> (4)**. In the drybox, to a rapidly stirring solution of (<sup>t</sup>Bu<sub>2</sub>dmx)H<sub>2</sub> (1.01 g, 1.40 mmol, 1.0 equiv.) in benzene (20 mL) was added dropwise potassium bis(trimethylsilyl)amide (0.590 g, 2.95 mmol, 2.1 equiv.) as a solution in benzene (10 mL). Within seconds, formation of a thick orange slurry was observed. The reaction was stirred for an additional 45 minutes, followed by addition of hexanes (50 mL) and removal of solvent *in vacuo*. The resulting powder was suspended in hexanes, loaded onto a medium porosity glass frit, and rinsed with boiling toluene (3 x 5 mL) and ample hexanes (3 x 5 mL). The remaining solid – putatively assigned as (<sup>t</sup>Bu<sub>2</sub>dmx)K<sub>2</sub> (**4**) – was collected as a deep orange powder (1.04 g, 93 %) and employed without further purification. Due to the insolubility of **9** in anhydrous non-polar (*e.g.*, hexanes, toluene) and polar aprotic organic solvents (*e.g.*, dichloromethane, tetrahydrofuran), further characterization by <sup>1</sup>H NMR, <sup>13</sup>C NMR, or elemental analysis was not conducted.

*Note:* An alternative formulation of **4** is a coordination polymer in which bridging potassium ions between different (<sup>t</sup>Bu<sub>2</sub>dmx) units engender low solubility.

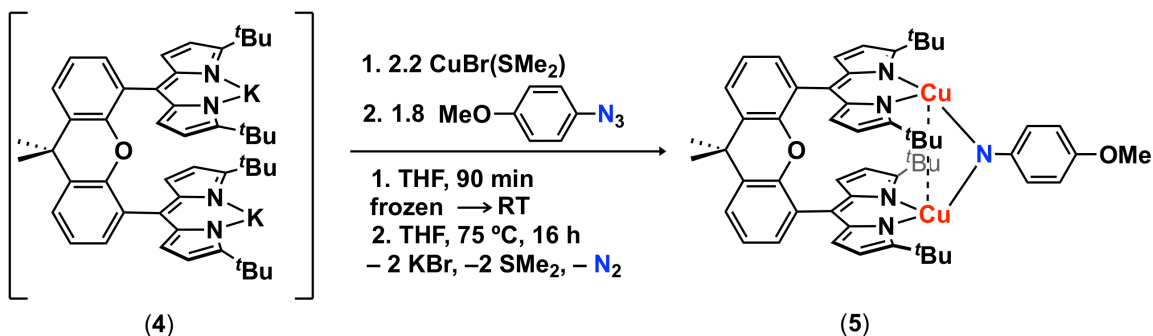

$(^t\text{Bu}_2\text{dmx})\text{Cu}_2(\mu^2\text{-N}(\text{C}_6\text{H}_4\text{OMe}))$  (**5**). In the drybox, to a thawing suspension of **4** (0.300 g, 0.373 mmol, 1.0 equiv.) in tetrahydrofuran (20 mL) was added copper bromide dimethylsulfide complex (0.170 g, 0.828 mmol, 2.2 equiv.) as a solid. Over 90 minutes, the reaction became a homogeneous red-orange solution. The reaction was subsequently filtered through a plug of Celite, followed by the addition of 4-methoxyphenyl azide<sup>4</sup> (0.100 g, 0.679 mmol, 1.8 equiv.) in tetrahydrofuran (10 mL) to the filtrate. The mixture was transferred to a Schlenk tube, sealed, removed from the drybox, and heated to 75 °C for 16 h. The deep purple solution was returned into the drybox and dried *in vacuo*. The resulting solid was dissolved in minimal benzene, filtered through a plug of Celite, and lyophilized. The resulting dark purple powder was dissolved in minimal acetonitrile and stirred rapidly for 2 h, accompanied by formation of a thick purple slurry. The mixture was placed in a -35 °C freezer for 1 h. The mixture was filtered through a pad of Celite on top of a coarse porosity frit, followed by rinsing of the residual solids with thawing acetonitrile (2 x 3 mL). The filtrate was discarded, and the residual purple powder was eluted with benzene and lyophilized to afford  $(^t\text{Bu}_2\text{dmx})\text{Cu}_2(\mu^2\text{-N}(\text{C}_6\text{H}_4\text{OMe}))$  (**5**) as a dark purple solid (0.235 g, 65 %). Single crystals suitable for X-ray diffraction were obtained by layering acetonitrile with a concentrated solution of **5** in diethyl ether. <sup>1</sup>H NMR (600 MHz, C<sub>6</sub>D<sub>6</sub>): δ 9.33 (dd, *J* = 6.7, 2.3 Hz, 2H, aryl imide C-H), 7.20 (dd, *J* = 7.9, 1.6 Hz, 2H, dipyrin C-H), 6.97 (dd, *J* = 7.3, 1.6 Hz, 2H, dipyrin C-H), 6.78 (m, 6 H, xanthene C-H), 6.68 (dd, *J* = 5.6, 1.9 Hz, 4H, aryl imide C-H), 6.62 (d, *J* = 4.4 Hz, 4H, dipyrin C-H), 3.08 (s, 3H, imide methoxy C-H), δ 1.58 (s, 6H, xanthene methyl C-H), δ 1.37 (s, 36H, *tert*-butyl C-H). <sup>13</sup>C NMR (150 MHz, C<sub>6</sub>D<sub>6</sub>): 173.19, 164.89, 161.38, 151.83, 144.85, 142.41, 141.69, 134.52, 133.82, 131.93, 128.38, 124.21, 119.55, 117.43, 57.77, 37.03, 36.32, 34.94, 33.58. NIR/UV-vis (THF), λ<sub>max</sub>/nm (ε/M<sup>-1</sup> cm<sup>-1</sup>): 1330 (430), 780 (8,200), 600 (32,000), 480 (101,000), 350 (18,200), 300 (22,100). Calculated for C<sub>56</sub>H<sub>63</sub>Cu<sub>2</sub>N<sub>5</sub>O: C 69.68 H 6.58 N 7.26; Found: C 69.69 H 6.60 N 7.34.

Note: The putative intermediate species (*t*Bu<sub>2</sub>dmx)Cu<sub>2</sub>(SMe<sub>2</sub>)<sub>2</sub> was noted to be unstable upon workup or isolation attempts.

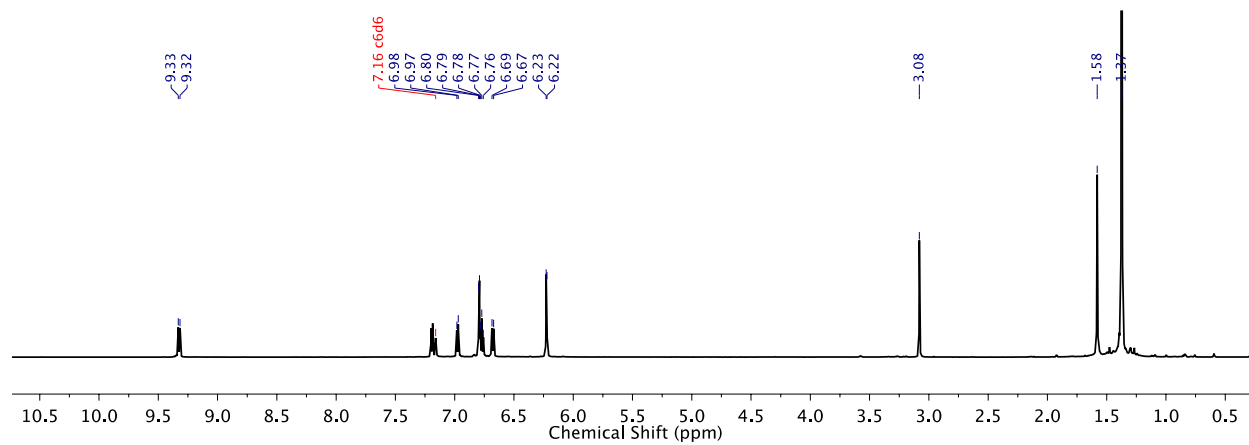

Figure S–11. <sup>1</sup>H NMR spectrum of (*t*Bu<sub>2</sub>dmx)Cu<sub>2</sub>(μ<sup>2</sup>-N(C<sub>6</sub>H<sub>4</sub>OMe)) (**5**), (600 MHz, C<sub>6</sub>D<sub>6</sub>).

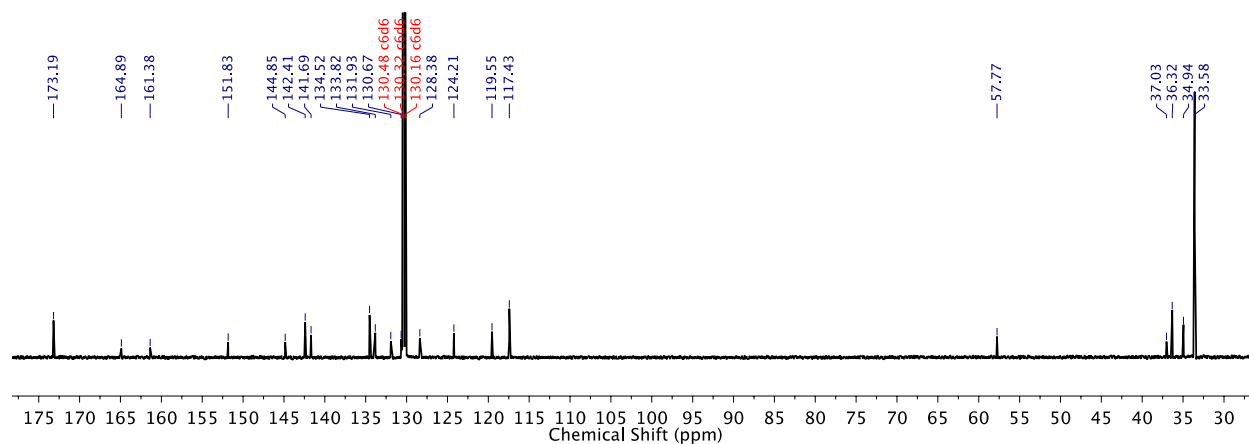

Figure S–12. <sup>13</sup>C NMR spectrum of (*t*Bu<sub>2</sub>dmx)Cu<sub>2</sub>(μ<sup>2</sup>-N(C<sub>6</sub>H<sub>4</sub>OMe)) (**5**), (125 MHz, C<sub>6</sub>D<sub>6</sub>).

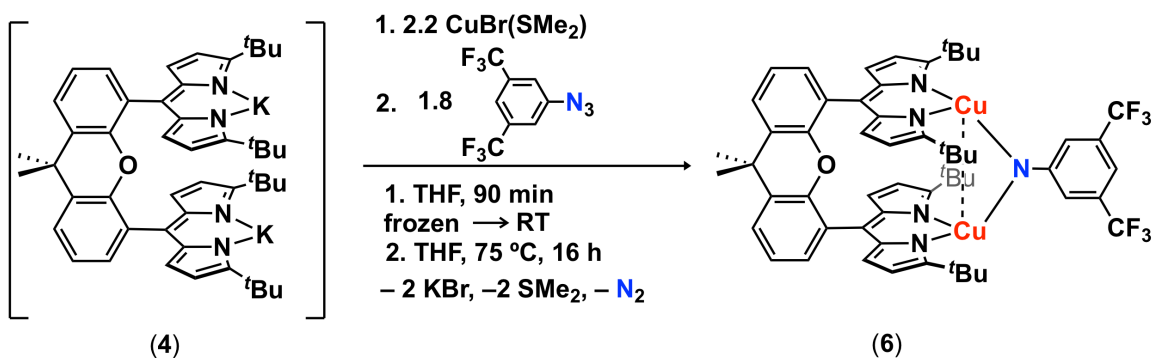

(<sup>t</sup>Bu<sub>2</sub>dmx)Cu<sub>2</sub>(μ<sup>2</sup>-N(3,5-(F<sub>3</sub>C)<sub>2</sub>C<sub>6</sub>H<sub>3</sub>)) (6). In the drybox, to a thawing suspension of **4** (0.070 g, 0.096 mmol, 1.0 equiv.) in tetrahydrofuran (5 mL) was added copper bromide dimethylsulfide complex (0.040 g, 0.21 mmol, 2.2 equiv.) as a solid. Over 90 minutes, the reaction became a homogeneous red-orange solution. The reaction was subsequently filtered through a plug of Celite, followed by the addition of 3,5-bis(trifluoromethyl)phenyl azide<sup>3</sup> (0.040 g, 0.17 mmol, 1.8 equiv.) in tetrahydrofuran (5 mL) to the filtrate. The mixture was transferred to a Schlenk tube, sealed, exported from the drybox, and heated to 70 °C for 16 h. The subsequent dark purple solution was returned to drybox and dried *in vacuo*. The resulting solid was dissolved in minimal benzene, filtered through a plug of Celite, and lyophilized. The resulting dark purple powder was dissolved in minimal acetonitrile and stirred rapidly for 2 h to form a thick slurry. The vial was transferred to the freezer for 2 h. The mixture was filtered through a pad of Celite on top of a coarse porosity frit, followed by rinsing of the residual solids on top of the frit with minimal thawing acetonitrile (2 x 10 mL) until the filtrate became faint pink. The filtrate was discarded, and the remaining deep purple solids were eluted with benzene and lyophilized to afford (<sup>t</sup>Bu<sub>2</sub>dmx)Cu<sub>2</sub>(μ<sup>2</sup>-N(3,5-(F<sub>3</sub>C)<sub>2</sub>C<sub>6</sub>H<sub>3</sub>)) (**6**) as a dark purple solid (0.050 g, 49 %). Single crystals suitable for X-ray diffraction were obtained by layering acetonitrile with a concentrated solution of **11** in diethyl ether at -35 °C overnight. <sup>1</sup>H NMR (600 MHz, C<sub>6</sub>D<sub>6</sub>): δ 9.48 (s, 2H, aryl imide C-H), 8.08 (s, 1H, aryl imide C-H), 7.19 (d, *J* = 8.0 Hz, 2H, dipyrin C-H), 6.77 (m, 6H, xanthene C-H), 6.09 (d, *J* = 4.0 Hz, 4H, dipyrin C-H), 1.57 (s, 6H, xanthene methyl C-H), 1.33 (s, 36H, *tert*-butyl C-H). <sup>19</sup>F NMR (470 MHz, C<sub>6</sub>D<sub>6</sub>): δ -62.50 (s, aryl imide CF<sub>3</sub>). <sup>13</sup>C NMR (125 MHz, C<sub>6</sub>D<sub>6</sub>): δ 171.84, 163.37, 149.00, 142.39, 138.97, 134.14, 133.88, 133.62, 133.36, 132.93, 131.53, 131.07, 129.40, 127.06, 126.22, 124.38, 122.20, 121.79, 118.17, 115.51, 34.36, 33.31, 32.44, 30.53. NIR/UV-vis (THF), λ<sub>max</sub>/nm (ε/M<sup>-1</sup> cm<sup>-1</sup>): 1430 (600), 1120 (300), 760

(13,500), 670 (13,000), 480 (140,000), 360 (23,500), 310 (33,300). Calculated for  $C_{57}H_{59}Cu_2F_6N_5O$ : C 63.91 H 5.55 N 6.54; Found: C 63.90 H 5.51 N 6.47.

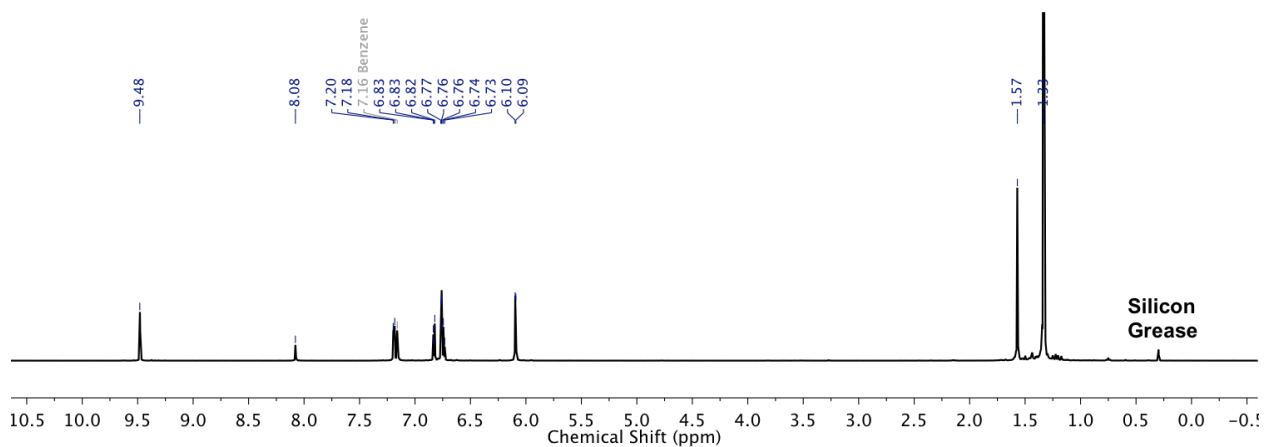

**Figure S-13.**  $^1H$  NMR spectrum of  $(tBu dmx)Cu_2(\mu^2-N(3,5-(F_3C)_2C_6H_3))$  (**6**), (600 MHz,  $C_6D_6$ ).

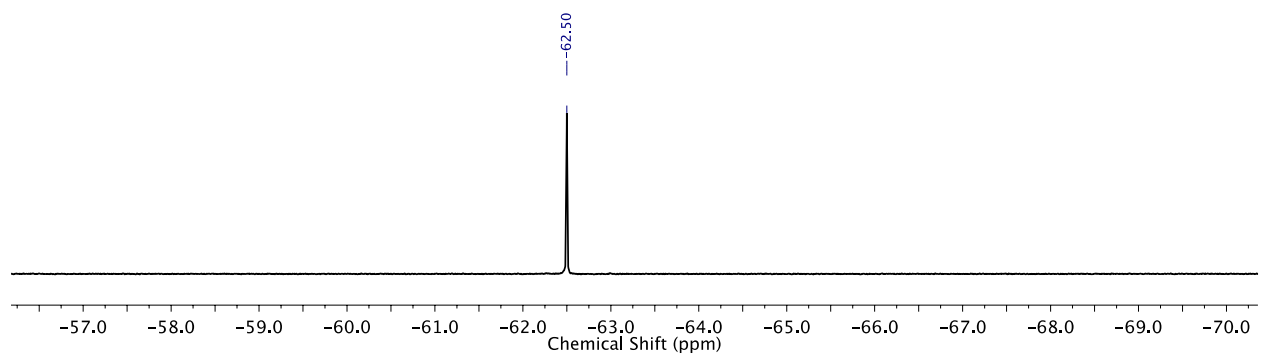

**Figure S-14.**  $^{19}F$  NMR spectrum of  $(tBu dmx)Cu_2(\mu^2-N(3,5-(F_3C)_2C_6H_3))$  (**6**), (375 MHz,  $C_6D_6$ ).

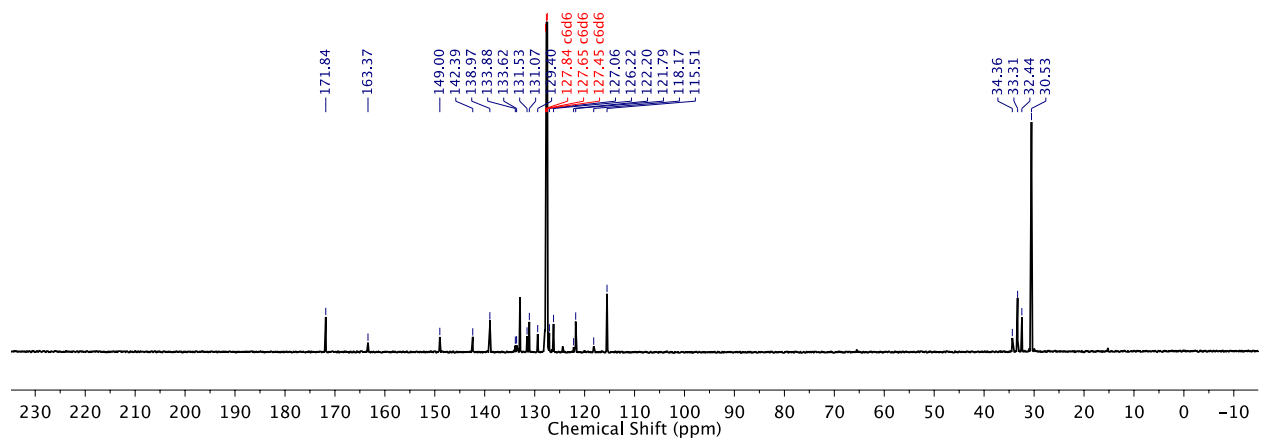

**Figure S-15.**  $^{13}C$  NMR spectrum of  $(tBu dmx)Cu_2(\mu^2-N(3,5-(F_3C)_2C_6H_3))$  (**6**), (125 MHz,  $C_6D_6$ ).

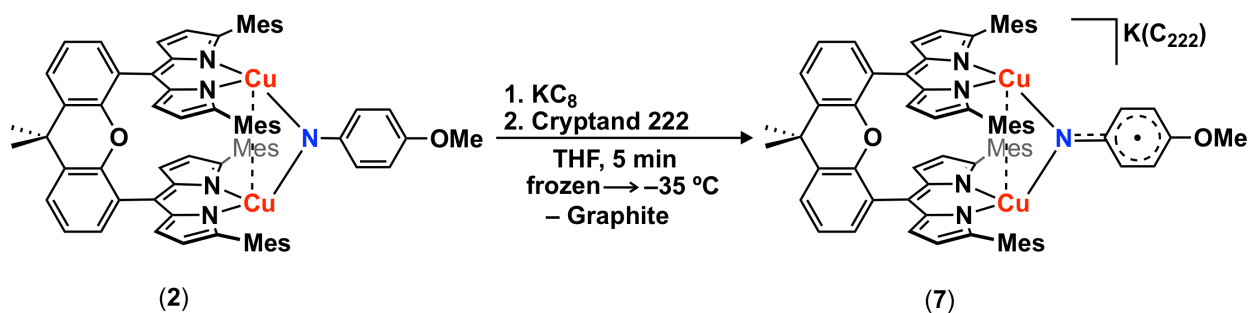

$[\text{K}(\text{C}_{222})][(\text{Mes})_2\text{dmx})\text{Cu}_2(\mu^2\text{-N}(\text{C}_6\text{H}_4\text{OMe}))]$  (7). Due to the thermal instability of 7, all manipulations were performed at  $-35\text{ }^\circ\text{C}$  or below  $-35\text{ }^\circ\text{C}$ . Allowing 7 to stand at room temperature in solution or the solid state affords a marked color change to deep red, accompanied by complete consumption of 7 as ascertained by  $^1\text{H}$  NMR spectroscopy. In the drybox, a thawing suspension of  $\text{KC}_8$  (0.003 g, 0.021 mmol, 1.05 equiv.) in tetrahydrofuran (0.5 mL) was added to solid 2 (0.025 g, 0.020 mmol, 1.0 equiv.), resulting in a rapid color change from violet to pink upon thawing. The mixture was physically agitated for ten seconds and placed into a liquid-nitrogen chilled cold well to solidify the mixture. The solid suspension was layered with a thawing solution of Cryptand 222 (222c; 0.008 g, 0.021 mmol, 1.05 equiv.) in tetrahydrofuran (0.3 mL) and allowed to thaw. The thawed solution was physically agitated for ten seconds – resulting in a darkening of the solution – and filtered through a pad of cold Celite within a pre-chilled pipette to afford  $[\text{K}(\text{C}_{222})][(\text{Mes})_2\text{dmx})\text{Cu}_2(\mu^2\text{-N}(\text{C}_6\text{H}_4\text{OMe}))]$  (7) accompanied by quantitative consumption of 2 by  $^1\text{H}$  NMR spectroscopy. The resulting brown-pink solution was layered with a thawing 1:3 benzene/hexane mixture (2 mL) and placed in a  $-35\text{ }^\circ\text{C}$  freezer over two days to afford crystals suitable for X-ray diffraction.  $^1\text{H}$  NMR (500 MHz,  $\text{CD}_2\text{Cl}_2$ ):  $\delta$  7.56 (br),  $\delta$  7.25 (br),  $\delta$  7.16 (br),  $\delta$  6.46 (br), 2.56 (br). *Note:* Although an isolated yield of 7 could not be obtained, treatment of 7 generated in situ with stoichiometric silver trifluoromethanesulfonate re-afforded 2 quantitatively, suggesting the formation of 7 to proceed in quantitative yield. Due to the thermal instability of the complex in the solid-state, a satisfactory elemental analysis could not be obtained.



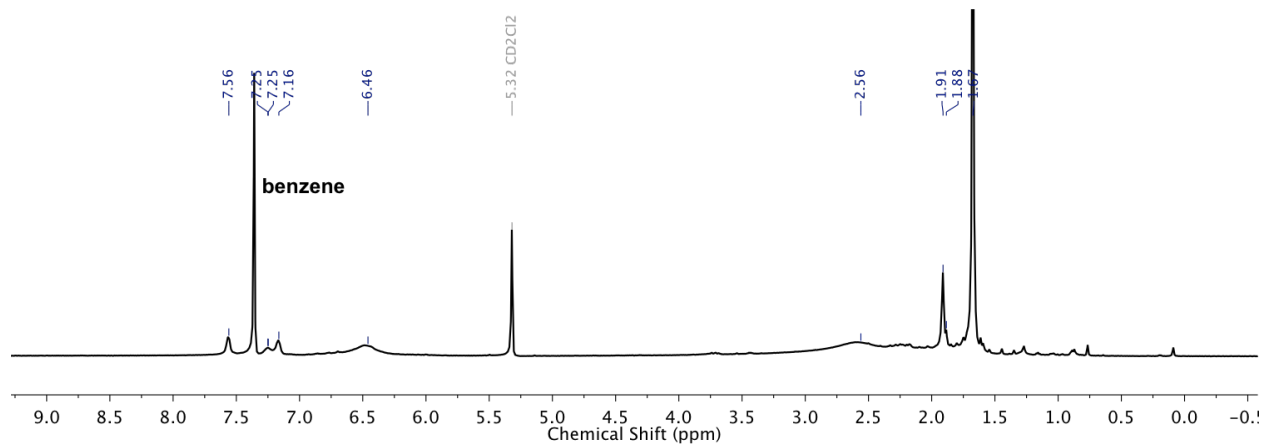

**Figure S-16.** <sup>1</sup>H NMR spectrum of *in situ* generated [K(C<sub>222</sub>)][(<sup>Mes</sup>dmx)Cu<sub>2</sub>(μ<sup>2</sup>-N(C<sub>6</sub>H<sub>4</sub>OMe))] (7), (600 MHz, CD<sub>2</sub>Cl<sub>2</sub>) on a just-thawed sample prior to thermal decomposition.

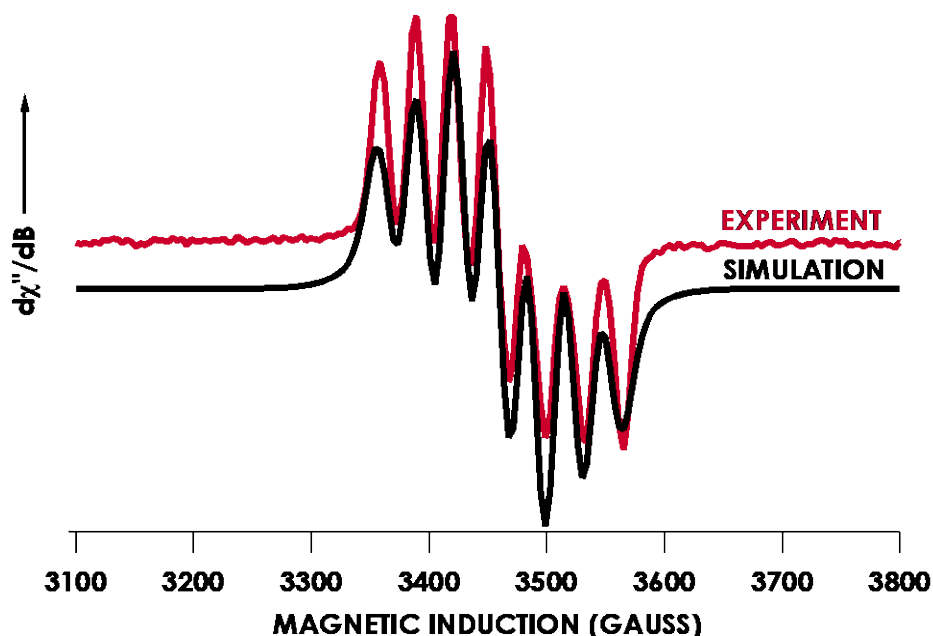

**Figure S-17.** Solution 2-methyltetrahydrofuran EPR spectrum of  $[\text{K}(\text{C}_{222})][(\text{Mesdmx})\text{Cu}_2(\mu^2\text{-N}(\text{C}_6\text{H}_4\text{OMe}))]$  (**7**) obtained from a just-thawed solution with microwave frequency of 9.843 GHz and 0.6325 mW microwave power, expanded to show an isotropic  $S = 1/2$  signal (red) simulated using SpinCount (black) with the following parameters:  $g_{\text{iso}} = 2.033$ ,  $\sigma_{g_x} = 0.0277$ ,  $\sigma_{g_y} = 0.0039$ ,  $\sigma_{g_z} = 0.0051$ ;  $^{63}\text{Cu}_2 A_{\text{iso}} = 87.4$  MHz;  $^{14}\text{N} A_{\text{iso}} = 17.8$  MHz. *Note:* EPR resonances for **7** disappear when the reaction mixture is left to stand at room temperature over 1 h due to thermal decomposition to diamagnetic species.

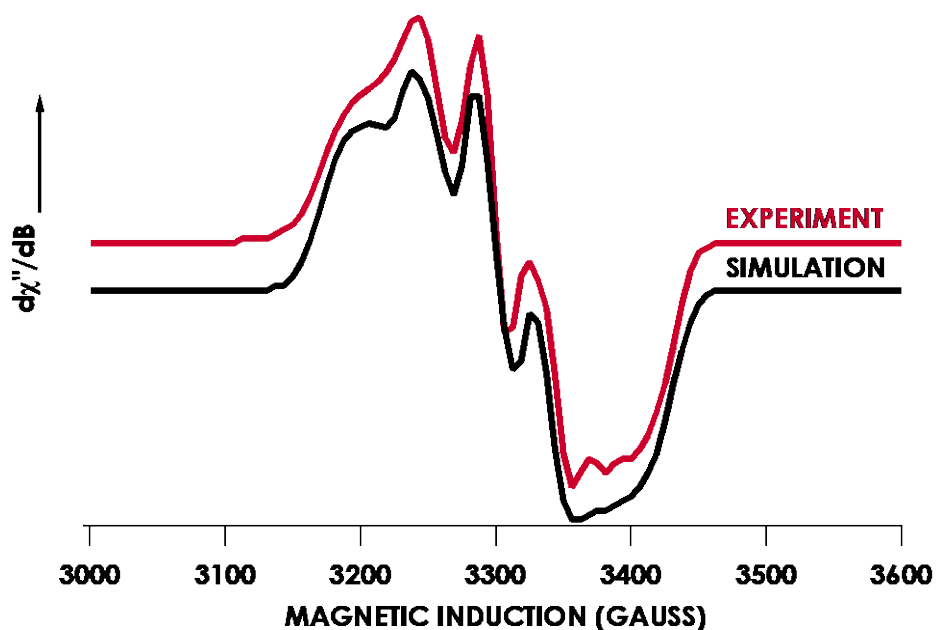

**Figure S-18.** Frozen 2-methyltetrahydrofuran EPR spectrum of  $[K(C_{222})][(\text{Mes}^{\text{dmx}}\text{Cu}_2(\mu^2\text{-N}(\text{C}_6\text{H}_4\text{OMe})))]$  (7) obtained at 4 K with microwave frequency of 9.378 GHz and 0.6325 mW microwave power expanded to show an anisotropic  $S = 1/2$  signal (red) simulated using SpinCount (black) with the following parameters:  $g_x = 1.979$ ,  $g_y = 2.032$ ,  $g_z = 2.074$ ;  $\sigma_{g_x} = 0.0080$ ,  $\sigma_{g_y} = 0.0014$ ,  $\sigma_{g_z} = 0.0098$ ;  $^{63}\text{Cu}_2$   $A_x = 9.3$  MHz,  $A_y = 43.9$  MHz,  $A_z = 9.7$  MHz;  $^{14}\text{N}$   $A_x = 86.6$  MHz,  $A_y = 125.6$  MHz,  $A_z = 130.3$  MHz.

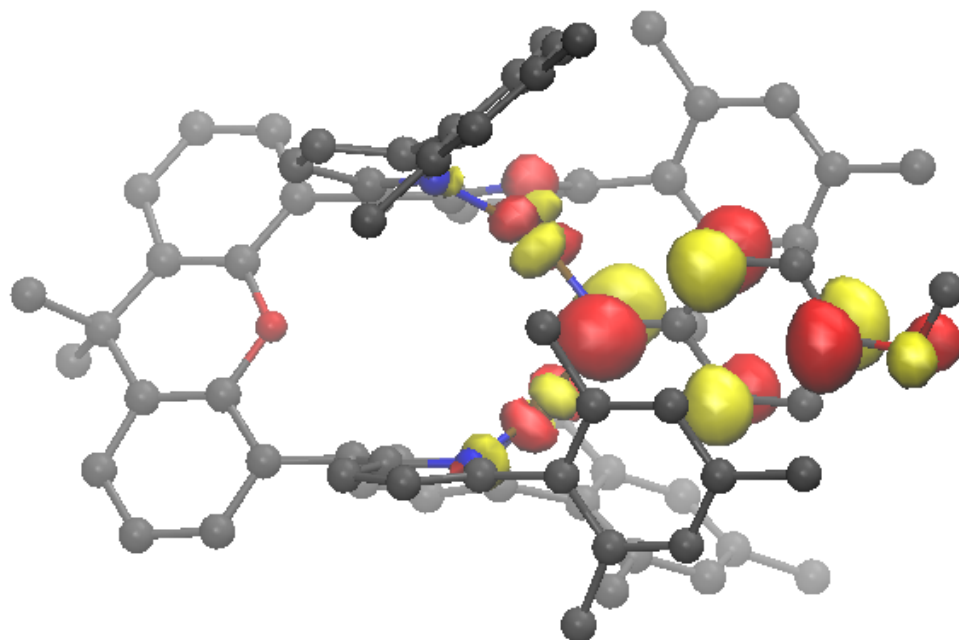

**Figure S-19.** Singly occupied molecular orbital (SOMO) of  $[\text{K}(\text{C}_{222})][(\text{Mes}^{\text{dmx}}\text{Cu}_2(\mu^2\text{-N}(\text{C}_6\text{H}_4\text{OMe})))]$  (**7**), displaying pronounced radical character delocalized across both copper centers and the bridging nitrene motif. Calculated orbital coefficient values exceeding 0.05:  $\text{Cu}_1$  (0.11),  $\text{Cu}_2$  (0.09),  $\text{N}_{\text{imide}}$  (0.43),  $\text{C}_{\text{ipso}}$  (-0.16),  $\text{C}_{\text{ortho}}$  (0.28, 0.23),  $\text{C}_{\text{meta}}$  (-0.13, -0.11)  $\text{C}_{\text{ipso}}$  (0.21). Orbital resolution plotted at an isovalue of 0.03 au. See computational section for calculation details.

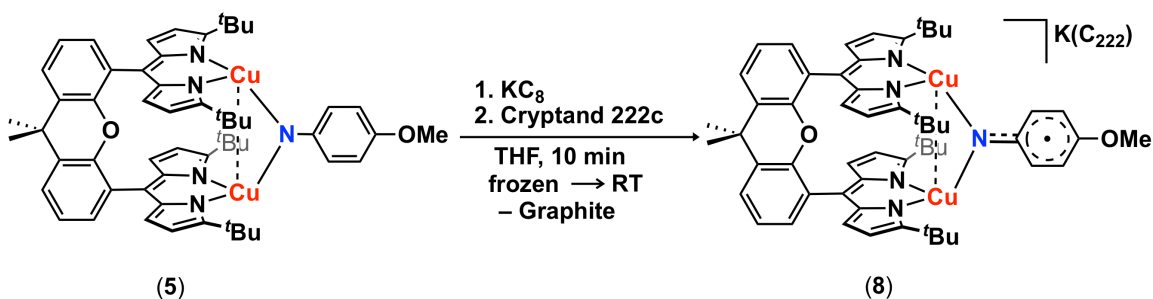

**[K(C<sub>222</sub>)][(<sup>t</sup>Bu<sub>2</sub>dmx)Cu<sub>2</sub>(μ<sup>2</sup>-N(C<sub>6</sub>H<sub>4</sub>OMe))]** (**8**). In the drybox, to a thawing solution of **5** (0.041 g, 0.042 mmol, 1.0 equiv.) in tetrahydrofuran (2 mL) was added KC<sub>8</sub> (0.006 g, 0.043 mmol, 1.03 equiv.), accompanied by a rapid color change from purple to yellow-brown. The reaction was stirred at room temperature for ten minutes, followed by addition of Cryptand 222 (222c; 0.015 g, 0.054 mmol, 1.3 equiv.). A rapid color change to pink-brown was noted. The solution was filtered through a pad of Celite, followed by removal of solvent *in vacuo*. The resulting powder was suspended in diethyl ether and filtered through a pad of Celite. The residual powder was eluted with minimal tetrahydrofuran, layered with diethyl ether, and placed in a -35 °C freezer overnight to afford large pink-brown crystals of [K(C<sub>222</sub>)][(<sup>t</sup>Bu<sub>2</sub>dmx)Cu<sub>2</sub>(μ<sup>2</sup>-N(C<sub>6</sub>H<sub>4</sub>OMe))] (**8**), (0.045 g, 78 %). Single crystals suitable for X-ray diffraction were grown by layering a solution of **8** in tetrahydrofuran with diethyl ether at -35 °C overnight. <sup>1</sup>H NMR (600 MHz, d<sub>8</sub>-THF): δ 9.36 (v. br) 7.45 (br), 6.98 (br), 3.44 (br), 3.40 (br), 2.57 (v. br), 2.42 (br), 1.77 (br). NIR/UV-vis (THF), λ<sub>max</sub>/nm (ε/M<sup>-1</sup> cm<sup>-1</sup>): 1300 (200), 770 (3,500), 600 (12,000), 490 (140,000), 390 (24,000), 290 (44,400). Calculated for C<sub>74</sub>H<sub>99</sub>Cu<sub>2</sub>KN<sub>7</sub>O<sub>8</sub>: C 64.37 H 7.23 N 7.10; Found: C 64.17 H 7.30 N 6.89.

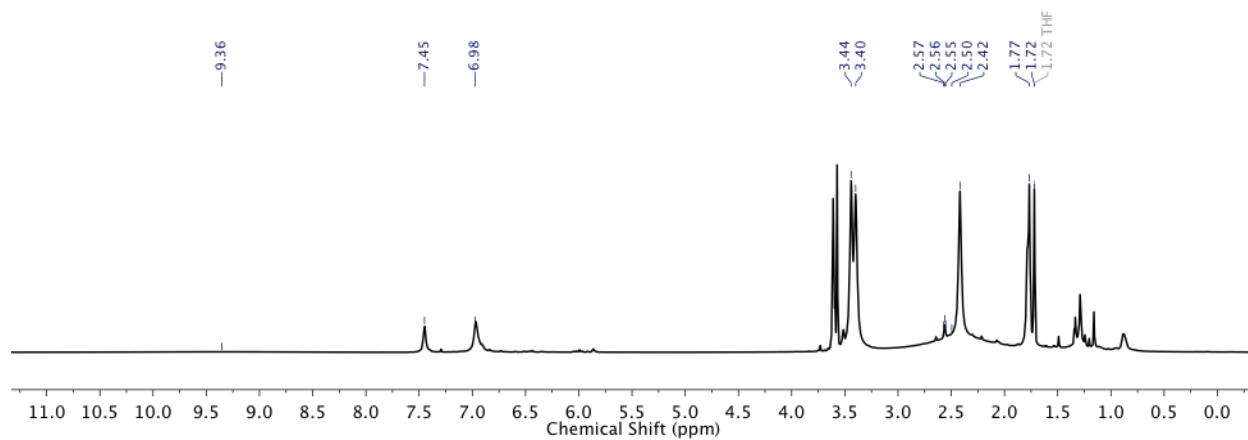

**Figure S-20.**  $^1\text{H}$  NMR spectrum of  $[\text{K}(\text{C}_{222})][(\text{}^t\text{Bu})\text{dmx})\text{Cu}_2(\mu^2\text{-N}(\text{C}_6\text{H}_4\text{OMe}))]$  (**8**), (600 MHz,  $\text{d}_8\text{-THF}$ ).

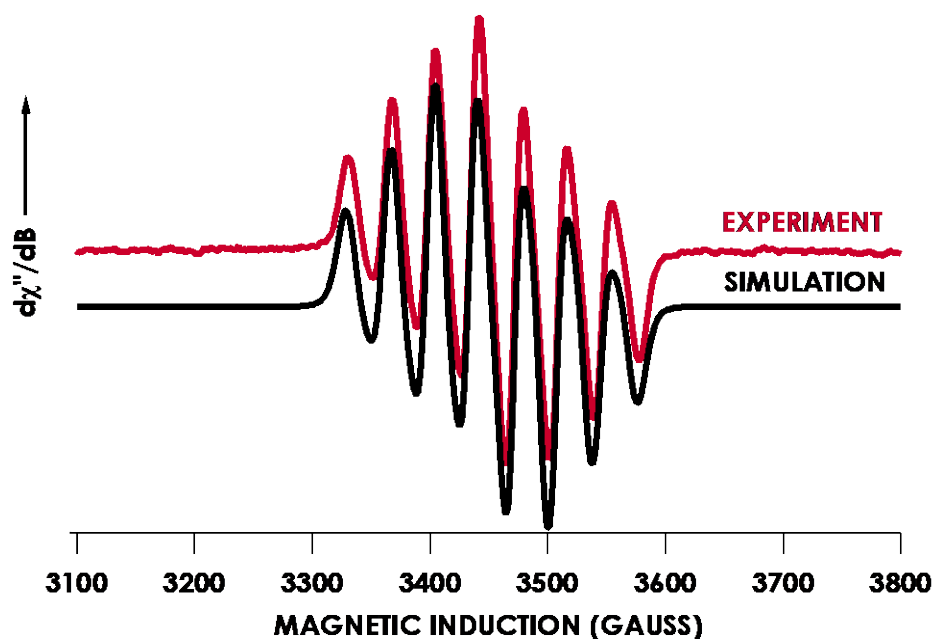

**Figure S–21.** Solution 2-methyltetrahydrofuran EPR spectrum of  $[\text{K}(\text{C}_{222})][(\text{}^t\text{Bu}^{\text{dmx}})\text{Cu}_2(\mu^2\text{-N}(\text{C}_6\text{H}_4\text{OMe}))]$  (**8**) obtained at 298 K with microwave frequency of 9.849 GHz and 0.6325 mW microwave power, expanded to show an isotropic  $S = 1/2$  signal (red) simulated using SpinCount (black) with the following parameters:  $g_{\text{iso}} = 2.038$ ,  $\sigma_{g_x} = 0.0106$ ,  $\sigma_{g_y} = 0.0020$ ,  $\sigma_{g_z} = 0.0042$ ;  ${}^{63}\text{Cu}_2 A_{\text{iso}} = 105.5$  MHz;  ${}^{14}\text{N} A_{\text{iso}} = 29.3$  MHz.

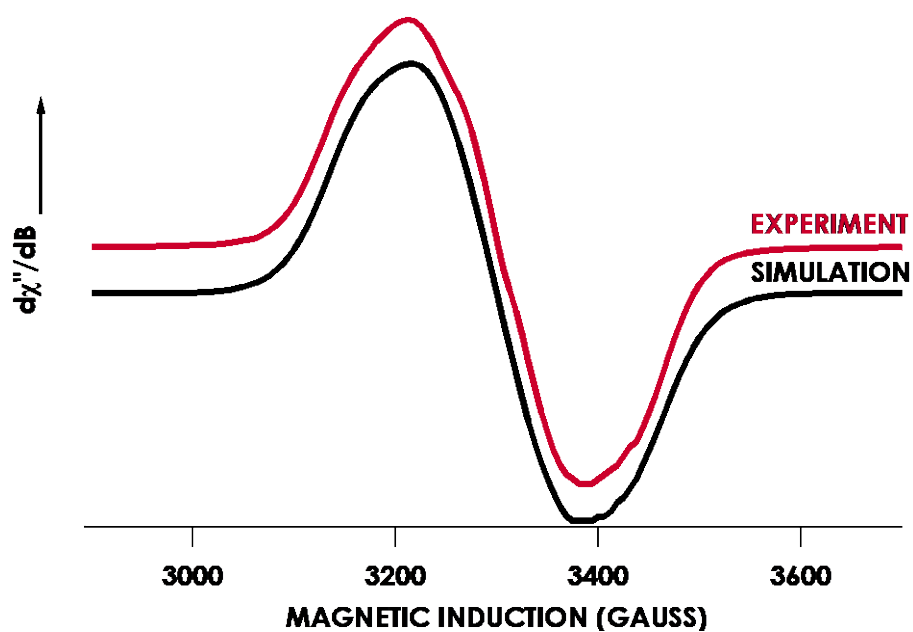

**Figure S–22.** Frozen 2-methyltetrahydrofuran EPR spectrum of  $[\text{K}(\text{C}_{222})][(\text{}^t\text{Bu}^{\text{dmx}})\text{Cu}_2(\mu^2\text{-N}(\text{C}_6\text{H}_4\text{OMe}))]$  (**8**) obtained at 4 K with microwave frequency of 9.381 GHz and 0.6325 mW microwave power expanded to show an isotropic  $S = 1/2$  signal (red) simulated using SpinCount (black) with the following parameters:  $g_{\text{iso}} = 2.029$ ;  $\sigma_{g_x} = 0.0465$ ,  $\sigma_{g_y} = 0.0370$ ,  $\sigma_{g_z} = 0.0190$ ;  ${}^{63}\text{Cu}_2 A_{\text{iso}} = 115.9$  MHz;  ${}^{14}\text{N} A_{\text{iso}} = 29.3$  MHz.



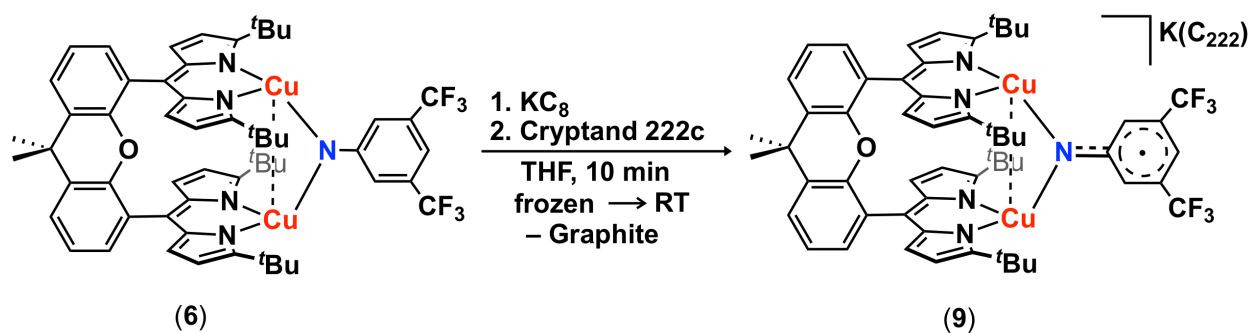

**[K(C<sub>222</sub>)][(<sup>t</sup>Bu<sub>2</sub>dmx)<sub>2</sub>Cu<sub>2</sub>(μ<sup>2</sup>-N(3,5-(CF<sub>3</sub>)<sub>2</sub>C<sub>6</sub>H<sub>3</sub>))]** (**9**). In the drybox, to a thawing solution of **6** (0.047 g, 0.044 mmol, 1.0 equiv) in tetrahydrofuran (2 mL) was added KC<sub>8</sub> (0.006 g, 0.044 mmol, 1.0 equiv.), accompanied by a rapid color change from purple to yellow-brown. The reaction was stirred at room temperature for ten minutes, followed by addition of Cryptand 222 (0.017 g, 0.052 mmol, 1.2 equiv). A rapid color change to red-brown was noted. After stirring for 30 minutes, the solution was filtered through a pad of Celite, followed by removal of solvent *in vacuo*. The resulting powder was suspended in diethyl ether and filtered through a pad of Celite. The residual powder was eluted with minimal tetrahydrofuran, layered with diethyl ether, and placed in a -35 °C freezer overnight to afford large brown crystals of [K(C<sub>222</sub>)][(<sup>t</sup>Bu<sub>2</sub>dmx)<sub>2</sub>Cu<sub>2</sub>(μ<sup>2</sup>-N(3,5-(CF<sub>3</sub>)<sub>2</sub>C<sub>6</sub>H<sub>3</sub>))] (**9**) (0.040 g, 63 %). Single crystals suitable for X-ray diffraction were grown by layering a solution of **15** in tetrahydrofuran with diethyl ether at -35 °C overnight. <sup>1</sup>H NMR (600 MHz, d<sub>8</sub>-THF): δ 9.42 (br) 7.44 (br), 6.96 (br), 3.49 (br), 3.45 (br), 2.46 (br), 1.78 (br). <sup>19</sup>F NMR (470 MHz, d<sub>8</sub>-THF): no resonances. UV/vis (THF) λ<sub>max</sub>/nm (ε/M<sup>-1</sup> cm<sup>-1</sup>): 490 (130,000), 420 (23,000), 300 (28,000). Calculated for C<sub>75</sub>H<sub>95</sub>Cu<sub>2</sub>F<sub>6</sub>KN<sub>7</sub>O<sub>7</sub>: C 60.59 H 6.44 N 6.59; Found: C 60.39 H 6.49 N 6.81.

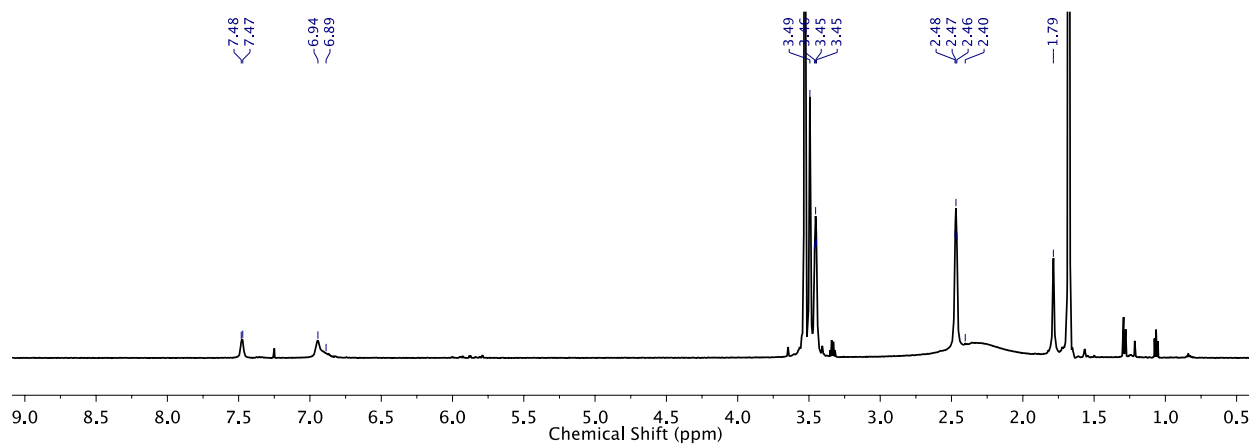

**Figure S-23.**  $^1\text{H}$  NMR spectrum of  $[\text{K}(\text{C}_{222})][(\textit{t}\text{Bu dmx})\text{Cu}_2(\mu^2\text{-N}(3,5\text{-}(\text{CF}_3)_2\text{C}_6\text{H}_3))]$  (**9**), (600 MHz,  $d_8$ -THF).

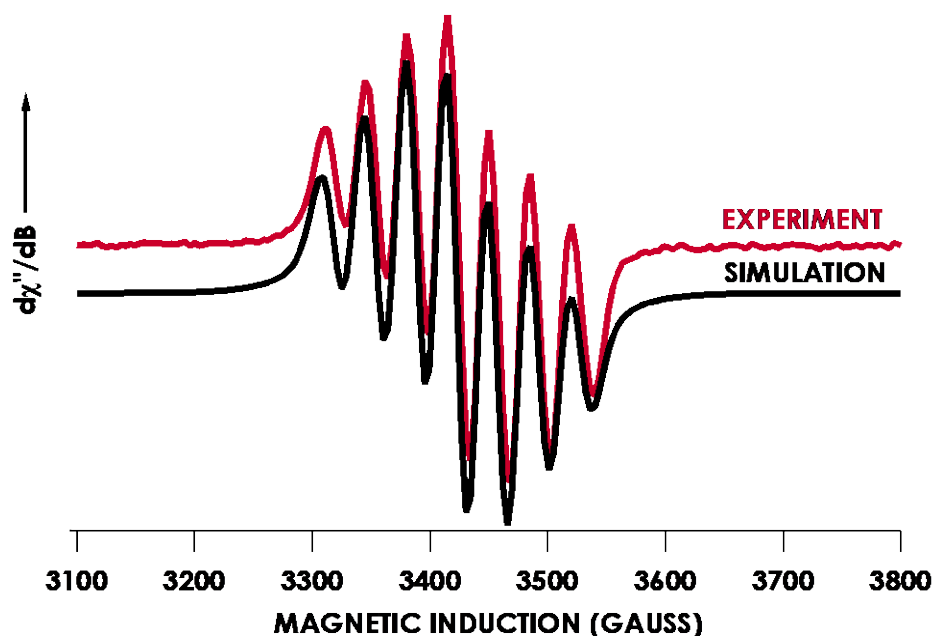

**Figure S–24.** Solution 2-methyltetrahydrofuran EPR spectrum of  $[\text{K}(\text{C}_{222})][(\text{}^t\text{Bu}^{\text{dmx}})\text{Cu}_2(\mu^2\text{-N}(3,5\text{-}(\text{CF}_3)_2\text{C}_6\text{H}_3))]$  (**9**) obtained at 298 K with microwave frequency of 9.847 GHz and 0.6325 mW microwave power, expanded to show an isotropic  $S = 1/2$  signal (red) simulated using SpinCount (black) with the following parameters:  $g_{\text{iso}} = 2.055$ ,  $\sigma_{g_x} = 0.0065$ ,  $\sigma_{g_y} = 0.0089$ ,  $\sigma_{g_z} = 0.0422$ ;  ${}^{63}\text{Cu}_2 A_{\text{iso}} = 99.4$  MHz;  ${}^{14}\text{N} A_{\text{iso}} = 5.7$  MHz.

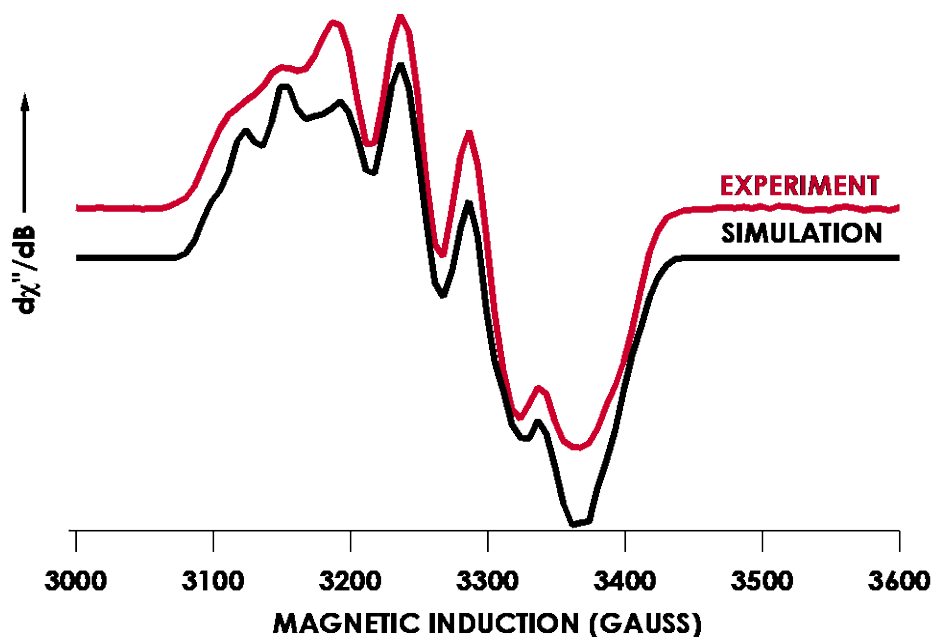

**Figure S–25.** Frozen 2-methyltetrahydrofuran EPR spectrum of  $[\text{K}(\text{C}_{222})][(\text{}^t\text{Bu}^{\text{dmx}})\text{Cu}_2(\mu^2\text{-N}(3,5\text{-}(\text{CF}_3)_2\text{C}_6\text{H}_3))]$  (**9**) obtained at 4 K with microwave frequency of 9.377 GHz and 0.6325 mW microwave power expanded to show an anisotropic  $S = 1/2$  signal (red) simulated using SpinCount (black) with the following parameters:  $g_x = 1.987$ ,  $g_y = 2.043$ ,  $g_z = 2.128$ ;  $\sigma_{g_x} = 0.0019$ ,  $\sigma_{g_y} = 0.0038$ ,  $\sigma_{g_z} = 0.0038$ ;  ${}^{63}\text{Cu}_2$   $A_x = 35.7$  MHz,  $A_y = 41.0$  MHz,  $A_z = 25.0$  MHz;  ${}^{14}\text{N}$   $A_x = 26.3$  MHz,  $A_y = 70.9$  MHz,  $A_z = 96.2$  MHz.

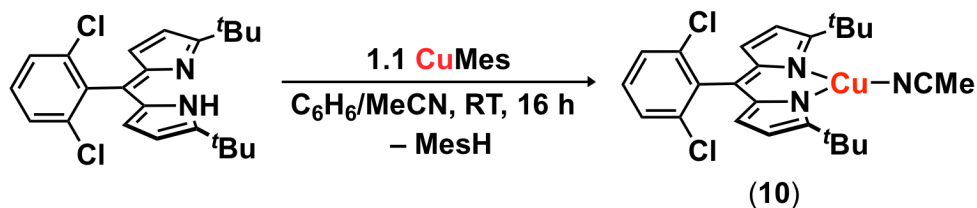

**(<sup>t</sup>BuL)Cu(NCMe) (10)**. In the drybox, to a solution of (<sup>t</sup>BuL)H (0.133 g, 0.331 mmol, 1.0 equiv.) in a benzene/acetonitrile mixture (3.0 mL C<sub>6</sub>H<sub>6</sub>, 0.5 mL MeCN) was added mesitylcopper<sup>10</sup> (0.067 mg, 0.365 mmol, 1.1 equiv.). The reaction was stirred for 16 h, during which a gradual color change from deep orange to red-pink was observed. Following removal of solvent *in vacuo*, the resulting red-pink powder was dissolved in minimal acetonitrile, filtered through a pad of Celite, and allowed to stand at -35 °C overnight to furnish large red crystals suitable for single crystal X-ray diffraction. The mother liquor was decanted, and the crystals were rinsed with cold acetonitrile to afford (<sup>t</sup>BuL)Cu(NCMe) (**10**) (0.095 g, 57 %). <sup>1</sup>H NMR (500 MHz, C<sub>6</sub>D<sub>6</sub>): δ 7.00 (d, *J* = 8.1 Hz, 2*H*, dipyrin C–*H*), 6.65 (d, *J* = 4.2 Hz, 2*H*, aryl C–*H*), 6.61 (t, *J* = 7.8 Hz, 1*H*, aryl C–*H*), 6.56 (d, *J* = 4.2 Hz, 2*H*, dipyrin C–*H*), 1.55 (s, 18*H*, *tert*-butyl C–*H*), 0.64 (s, 3*H*, acetonitrile C–*H*). <sup>13</sup>C NMR (125 MHz, C<sub>6</sub>D<sub>6</sub>): δ 170.57, 139.41, 136.42, 130.08, 128.80, 127.30, 116.09, 114.66, 34.02, 30.96, 0.26. Calculated for C<sub>25</sub>H<sub>28</sub>Cl<sub>2</sub>CuN<sub>3</sub>•0.5CH<sub>3</sub>CN: C 59.43 H 5.66 N 9.33; Found: C 59.50 H 5.56 N 9.23 (the molecule of acetonitrile is present from bulk recrystallization). *Note*: Although **16** demonstrates no signs of decomposition by <sup>1</sup>H NMR spectroscopy over several months in the solid state, room temperature solutions of **16** in C<sub>6</sub>D<sub>6</sub> in the absence of excess acetonitrile will gradually convert (< 10 % per 24 h) to (<sup>t</sup>BuL)<sub>2</sub>Cu<sub>2</sub> (**18**).

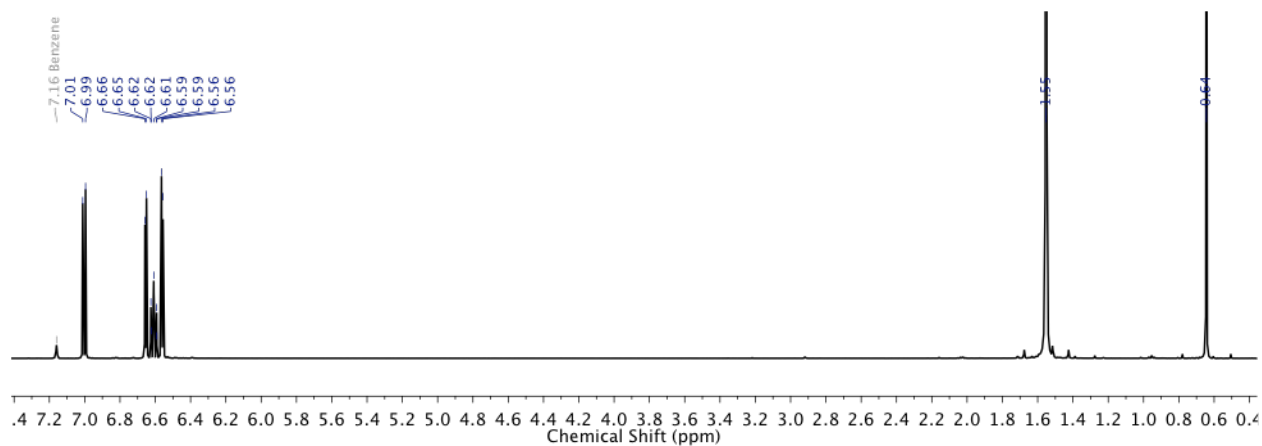

**Figure S-26.**  $^1\text{H}$  NMR spectrum of  $(t\text{BuL})\text{Cu}(\text{NCMe})$  (**10**), (500 MHz,  $\text{C}_6\text{D}_6$ ).

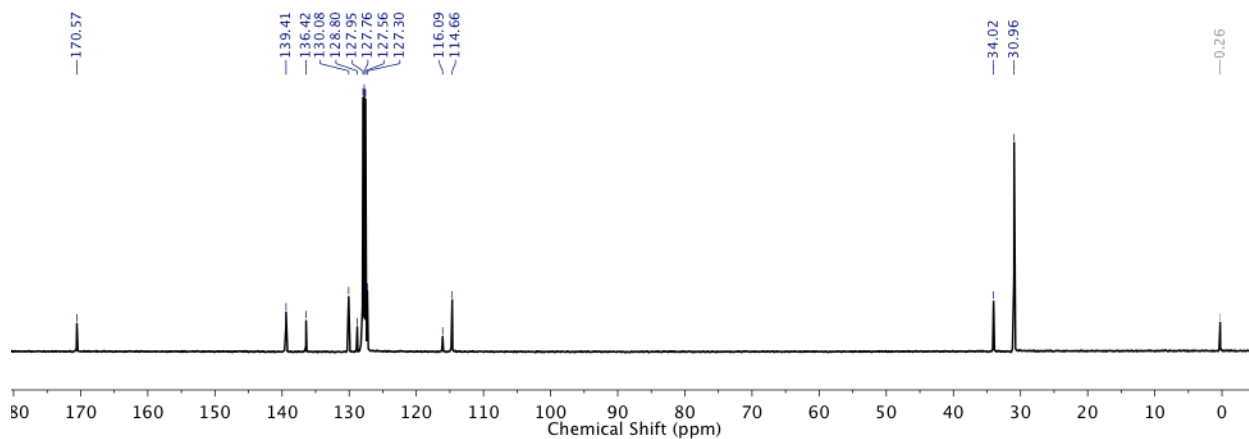

**Figure S-27.**  $^{13}\text{C}$  NMR spectrum of  $(t\text{BuL})\text{Cu}(\text{NCMe})$  (**10**), (125 MHz,  $\text{C}_6\text{D}_6$ ).

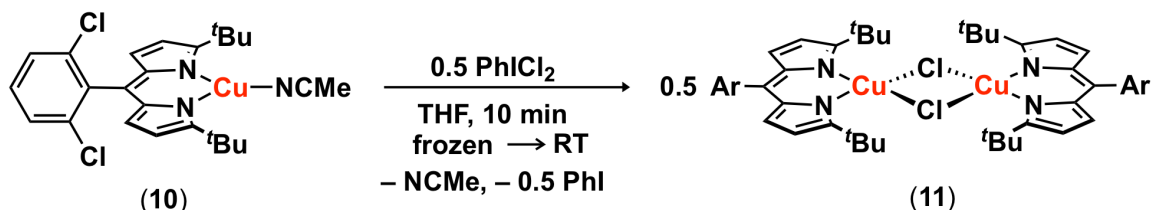

$[(^t\text{BuL})\text{CuCl}]_2$  (**11**). In the drybox, to a thawing solution of **10** (0.056 g, 0.100 mmol, 1.0 equiv.) in tetrahydrofuran (1 mL) was added iodobenzene dichloride<sup>8</sup> ( $\text{PhICl}_2$ ; 0.015 mg, 57  $\mu\text{mol}$ , 0.55 equiv.), accompanied by a rapid darkening of the solution. After ten minutes, solvent was removed *in vacuo*. The residual solid was dissolved in a 2:1 hexane/benzene mixture, filtered, and allowed to stand at  $-35\text{ }^\circ\text{C}$  overnight. The mother liquor was decanted, and the residual solids were rinsed with hexanes to afford  $[(^t\text{BuL})\text{CuCl}]_2$  (**11**) as a dark red solid (0.041 g, 74 %). Single crystals suitable for X-ray diffraction were obtained by allowing a concentrated pentane/benzene solution of **11** to stand overnight at  $-35\text{ }^\circ\text{C}$ .  $^1\text{H}$  NMR (500 MHz,  $\text{C}_6\text{D}_6$ ):  $\delta$  37.44 (br), 6.51 (br). Calculated for  $\text{C}_{46}\text{H}_{50}\text{Cl}_6\text{Cu}_2\text{N}_4 \cdot 2\text{C}_6\text{H}_6$ : C 60.32, 5.41, 4.85; Found: C 60.16, H 5.51, N 5.04 (two molecules of benzene are present from bulk recrystallization).

*Note:* Preparation of **11** by salt metathesis of  $(^t\text{BuL})\text{Li}$  with either anhydrous  $\text{CuCl}_2$  or  $\text{CuBr}_2$  is accompanied by partial halogenation of the dipyrin  $\beta$ -position as ascertained from single-crystal X-ray diffraction (*unpublished*),  $^1\text{H}$  NMR spectroscopy, and mass spectrometry.

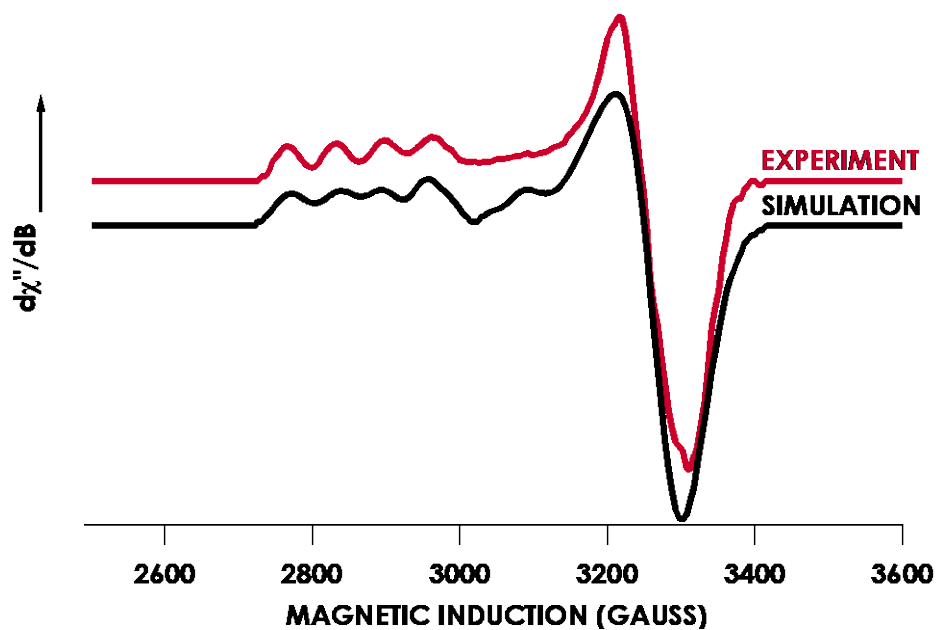

**Figure S–28.** Frozen toluene EPR spectrum of  $[(t\text{BuL})\text{CuCl}]_2$  (**11**) obtained at 77 K with microwave frequency of 9.454 GHz and 0.6325 mW microwave power expanded to show the axial signal (red) simulated using SpinCount (black) with the following parameters:  $g_{\perp} = 2.061$ ,  $g_{\parallel} = 2.365$ ;  $\sigma_{g_x} = 0.0301$ ,  $\sigma_{g_y} = 0.0296$ ,  $\sigma_{g_z} = 0.0180$ ;  $^{63}\text{Cu } A_{\parallel} = 199.3$  MHz.



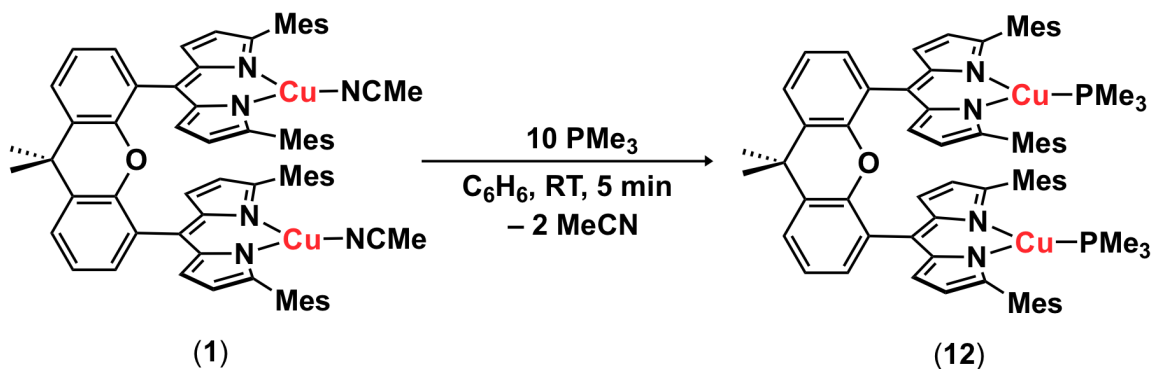

(<sup>Mes</sup>dmx)Cu<sub>2</sub>(PMe<sub>3</sub>)<sub>2</sub> (**12**). In the drybox, to a thawing solution of **1** (0.050 g, 0.040 mmol, 1.0 equiv.) in benzene (2 mL) was added dropwise excess trimethylphosphine (PMe<sub>3</sub>; 0.030 g, 0.40 mmol, 10 equiv.), during which a rapid color change from red-pink to translucent pink was noted. The reaction was stirred for 10 minutes, followed by removal of solvent *in vacuo*. The residue was dissolved in benzene, filtered through a pad of Celite, and lyophilized to afford (<sup>Mes</sup>dmx)Cu<sub>2</sub>(PMe<sub>3</sub>)<sub>2</sub> (**12**) as a bright pink solid (0.050 g, 98 %). Single crystals of **4** suitable for X-ray diffraction were obtained by allowing a concentrated tetrahydrofuran/hexanes solution of **12** to stand at -35 °C for one week. <sup>1</sup>H NMR (600 MHz, C<sub>6</sub>D<sub>6</sub>): δ 7.40 (dd, *J* = 7.3, 1.7 Hz, 2*H*, dipyrin C-H), 7.27 (dd, 7.3, 1.7 Hz, 2*H*, dipyrin C-H), 6.92 (d, *J* = 4.4 Hz, 4*H*, xanthene C-H), 6.85 (t, *J* = 7.6 Hz, 2*H*, xanthene C-H), 6.81 (s, 4*H*, mesityl aryl C-H), δ 6.75 (s, 4*H*, mesityl aryl C-H), 6.28 (d, *J* = 3.9 Hz, 4*H*, dipyrin C-H), 2.43 (s, 12*H*, mesityl ortho-methyl C-H), 2.32 (s, 12*H*, mesityl ortho-methyl C-H), 2.14 (s, 12*H*, mesityl para-methyl C-H) 1.61 (s, 6*H*, xanthene methyl C-H), 0.23 (d, *J* = 6.5 Hz, 18*H*, trimethylphosphine C-H). <sup>31</sup>P NMR (160 MHz, C<sub>6</sub>D<sub>6</sub>): δ -46.8 (s, PMe<sub>3</sub>). <sup>13</sup>C NMR (125 MHz, C<sub>6</sub>D<sub>6</sub>): δ 158.40, 149.48, 143.83, 140.98, 137.88, 137.29, 136.74, 135.90, 133.35, 131.46, 130.82, 129.40, 124.48, 121.36, 118.14, 67.43, 34.59, 30.99, 25.43, 22.13, 21.23, 20.72, 14.52, 14.34. Calculated for C<sub>75</sub>H<sub>82</sub>Cu<sub>2</sub>N<sub>4</sub>OP<sub>2</sub>•CH<sub>3</sub>CN: C 71.94 H 6.66 N 5.45; Found: C 72.24 H 6.67 N 5.13 (one molecule of acetonitrile is present from bulk recrystallization from a diethyl ether/acetonitrile recrystallization for elemental analysis).

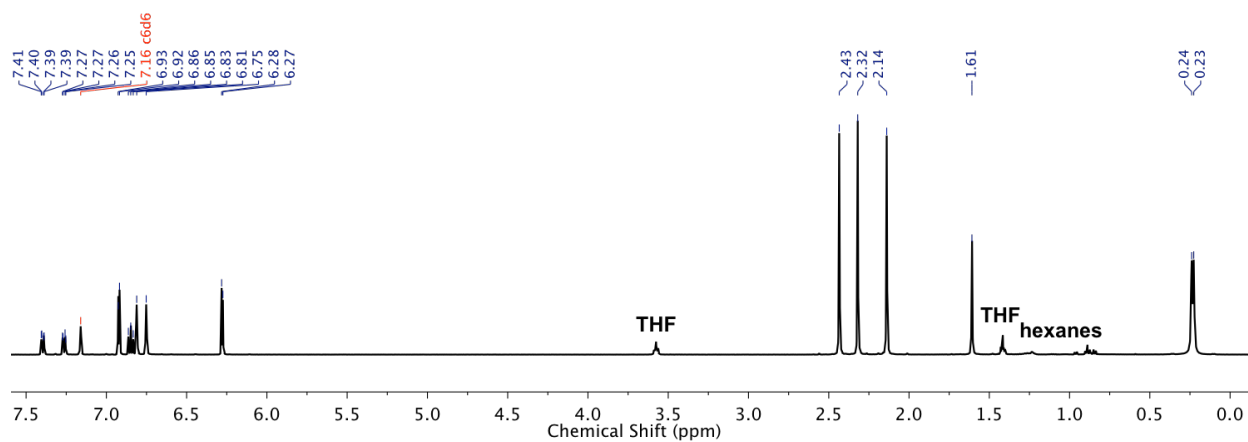

**Figure S-29.**  $^1\text{H}$  NMR spectrum of  $(^{\text{Mes}}\text{dmx})\text{Cu}_2(\text{PMe}_3)_2$  (**12**), (600 MHz,  $\text{C}_6\text{D}_6$ ).

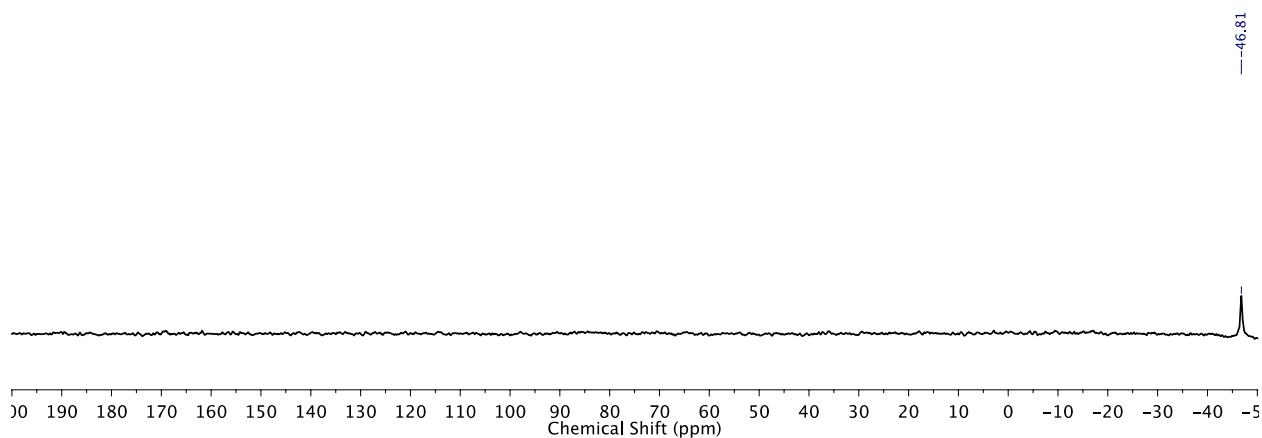

**Figure S-30.**  $^{31}\text{P}$  NMR spectrum of  $(^{\text{Mes}}\text{dmx})\text{Cu}_2(\text{PMe}_3)_2$  (**12**), (160 MHz,  $\text{C}_6\text{D}_6$ ).

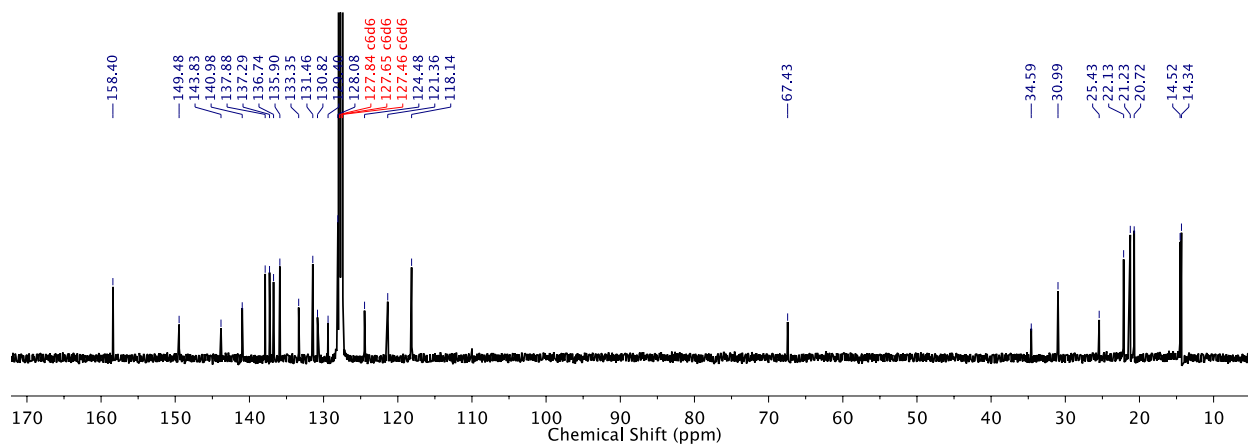

**Figure S-31.**  $^{13}\text{C}$  NMR spectrum of  $(^{\text{Mes}}\text{dmx})\text{Cu}_2(\text{PMe}_3)_2$  (**12**), (125 MHz,  $\text{C}_6\text{D}_6$ ).

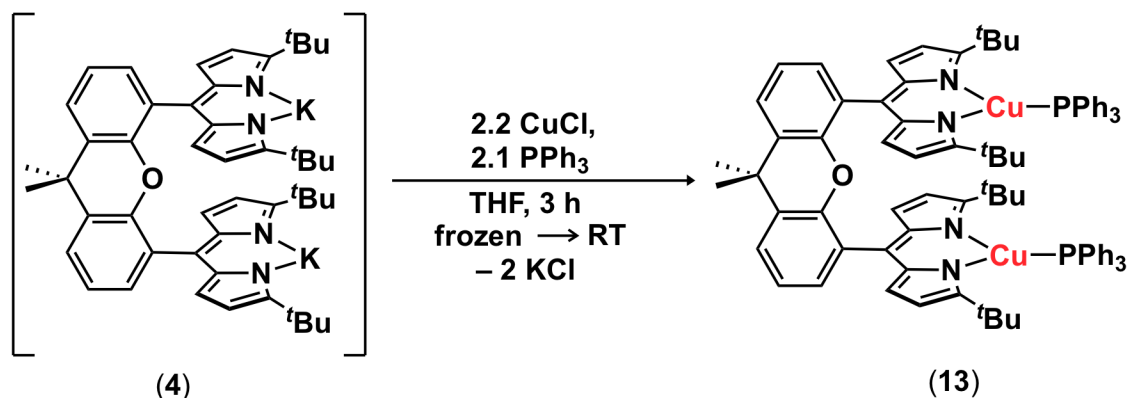

(<sup>t</sup>Bu<sub>2</sub>dmx)Cu<sub>2</sub>(PPh<sub>3</sub>)<sub>2</sub> (**13**). In the drybox, to a thawing suspension of **4** (0.500 g, 0.629 mmol, 1.0 equiv.) in tetrahydrofuran (10 mL) was added solid triphenylphosphine (PPh<sub>3</sub>; 0.350 g, 1.320 mmol, 2.1 equiv.) followed by cuprous chloride (0.137 g, 1.383 mmol, 2.2 equiv.). Over 2 h, homogenization and a color change to red-pink were noted. The solution was filtered through a pad of Celite and dried *in vacuo*. The residual solids were dissolved in benzene (5 mL) and lyophilized. The resulting powder was suspended in hexanes and filtered through a pad of Celite, followed by rinsing with hexanes (*ca.* 2 mL) and acetonitrile (*ca.* 2 mL). The residual powder was eluted with benzene and lyophilized to afford (<sup>t</sup>Bu<sub>2</sub>dmx)Cu<sub>2</sub>(PPh<sub>3</sub>)<sub>2</sub> (**13**) as a bright pink solid (0.800 g, 93 %). Single crystals suitable for X-ray diffraction were obtained by allowing a concentrated solution toluene/hexanes solution of **13** to stand overnight at –35 °C. <sup>1</sup>H NMR (600 MHz, C<sub>6</sub>D<sub>6</sub>): δ 7.25 (m, 14H, overlapping dipyrin C–H and triphenylphosphine C–H), 6.97 (m, 20H, triphenylphosphine C–H), 6.87 (m, 6H, xanthene C–H), 6.38 (dd, *J* = 4.1, 1.0 Hz, dipyrin C–H), 1.60 (s, 6H, xanthene methyl C–H), 1.44 (s, 36H, *tert*-butyl C–H). <sup>31</sup>P NMR (160 MHz, C<sub>6</sub>D<sub>6</sub>): δ -0.46 (s, PPh<sub>3</sub>). <sup>13</sup>C NMR (125 MHz, C<sub>6</sub>D<sub>6</sub>, δ/ppm): δ 167.98, 148.59, 142.85, 140.01, 133.81, 133.69, 133.41, 132.74, 130.54, 130.08, 129.62, 129.46, 128.55, 128.47, 124.69, 121.27, 113.36, 34.45, 33.55, 31.64, 30.80, 30.76. Calculated for C<sub>85</sub>H<sub>86</sub>Cu<sub>2</sub>N<sub>4</sub>OP<sub>2</sub>: C 74.59 H 6.33 N 4.09; Found: C 75.57 H 6.20 N 4.15.

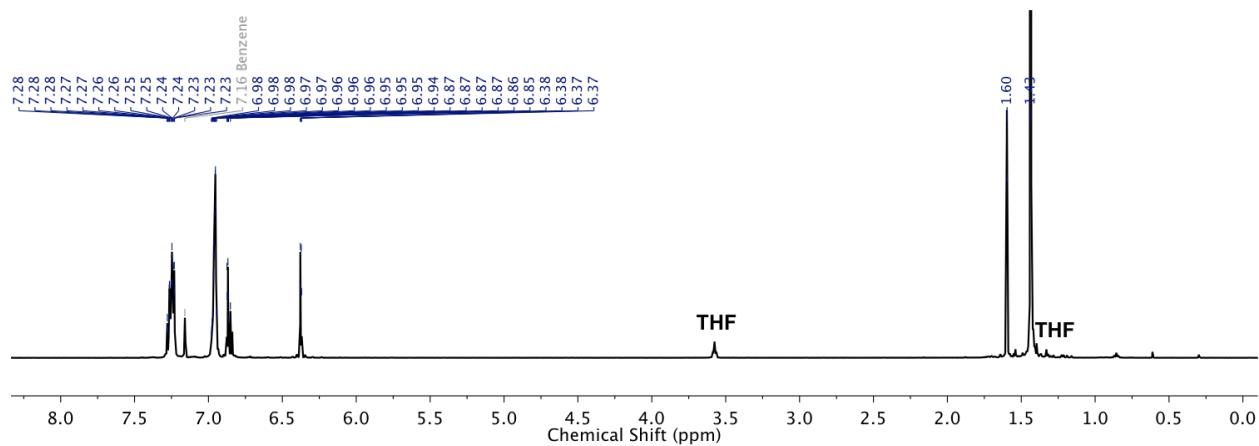

Figure S-32.  $^1\text{H}$  NMR spectrum of  $(t\text{Bu dmx})\text{Cu}_2(\text{PPh}_3)_2$  (**13**), (600 MHz,  $\text{C}_6\text{D}_6$ ).

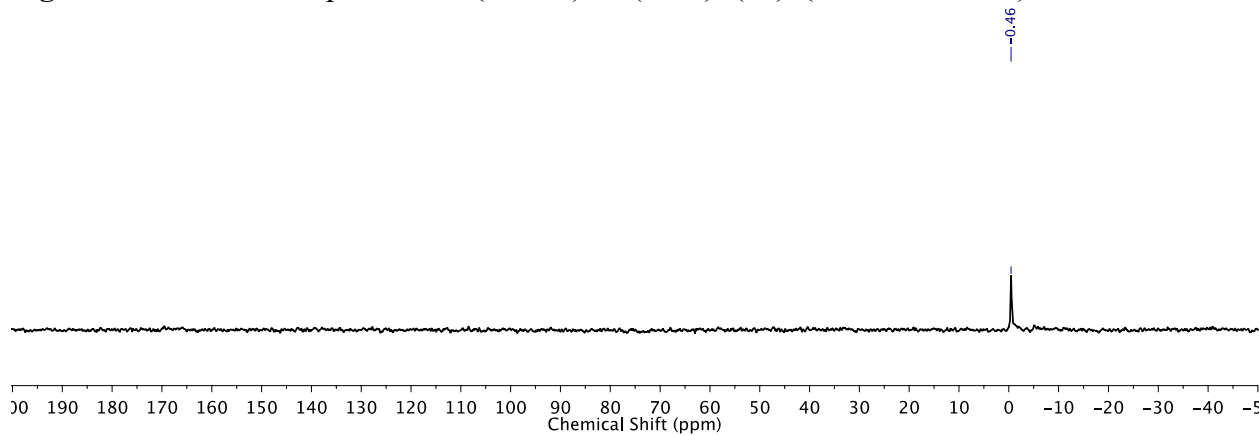

Figure S-33.  $^{31}\text{P}$  NMR spectrum of  $(t\text{Bu dmx})\text{Cu}_2(\text{PPh}_3)_2$  (**13**), (160 MHz,  $\text{C}_6\text{D}_6$ ).

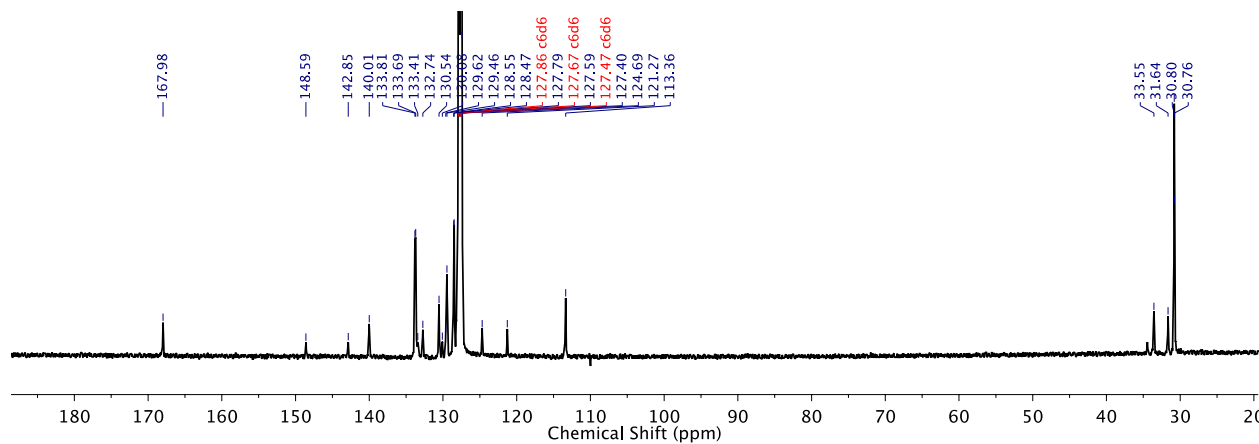

Figure S-34.  $^{13}\text{C}$  NMR spectrum of  $(t\text{Bu dmx})\text{Cu}_2(\text{PPh}_3)_2$  (**13**), (125 MHz,  $\text{C}_6\text{D}_6$ ).

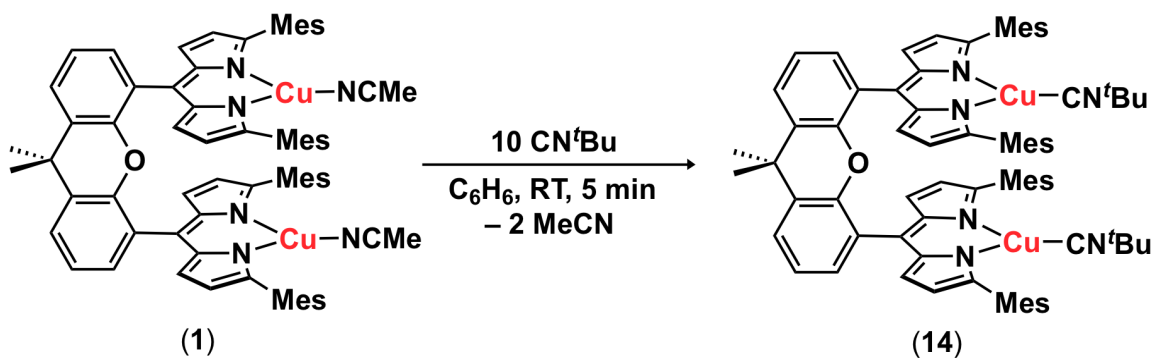

(<sup>Mes</sup>dmx)Cu<sub>2</sub>(CN<sup>t</sup>Bu)<sub>2</sub> (**14**). In the drybox, to a thawing solution of **1** (0.03 g, 0.025 mmol, 1.0 equiv) in benzene (2 mL) was added excess *tert*-butyl isocyanide (CN<sup>t</sup>Bu; 0.02 g, 0.250 mmol, 10 equiv), during which a rapid color change from red-pink to orange was noted. The reaction was stirred for 20 minutes, followed by removal of solvent *in vacuo*. The residue was dissolved in benzene, filtered through a pad of Celite, and lyophilized to afford (<sup>Mes</sup>dmx)Cu<sub>2</sub>(CN<sup>t</sup>Bu)<sub>2</sub> (**14**) as a bright orange powder (0.03 g, quant.). Single crystals of **14** suitable for X-ray diffraction were obtained by allowing a concentrated tetrahydrofuran/diethyl ether solution of **14** to stand overnight at -35 °C. <sup>1</sup>H NMR (600 MHz, C<sub>6</sub>D<sub>6</sub>): δ 7.33 (dd, *J* = 7.5, 1.3 Hz, 2*H*, dipyrin C-*H*), 7.26 (dd, *J* = 7.8, 1.4 Hz, 2*H*, dipyrin C-*H*), 6.86 (m, 6*H*, xanthene C-*H*), 6.77 (d, *J* = 5.2 Hz, 8 *H*, mesityl aryl C-*H*), 6.30 (dd, *J* = 4.1, 0.9 Hz, 4*H*, dipyrin C-*H*), 2.33 (s, 24*H*, mesityl ortho-methyl C-*H*), 2.30 (s, 12*H*, mesityl ortho-methyl C-*H*), 1.60 (s, 6*H*, xanthene methyl C-*H*), 0.85 (s, 18*H*, *tert*-butyl C-*H*). <sup>13</sup>C NMR (125 MHz, C<sub>6</sub>D<sub>6</sub>): δ 159.06, 149.28, 143.12, 140.67, 138.11, 137.37, 136.37, 134.96, 132.56, 131.12, 130.33, 128.94, 124.58, 121.28, 117.75, 54.10, 34.46, 31.57, 31.19, 29.29, 22.05, 21.39, 20.93. Calculated for C<sub>79</sub>H<sub>82</sub>Cu<sub>2</sub>N<sub>6</sub>O•0.50CH<sub>3</sub>CN: C 75.12 H 6.58 N 7.12; Found: C 75.51 H 6.66 N 7.25 (the molecule of acetonitrile is present from bulk recrystallization from acetonitrile/diethyl ether vapor diffusion).

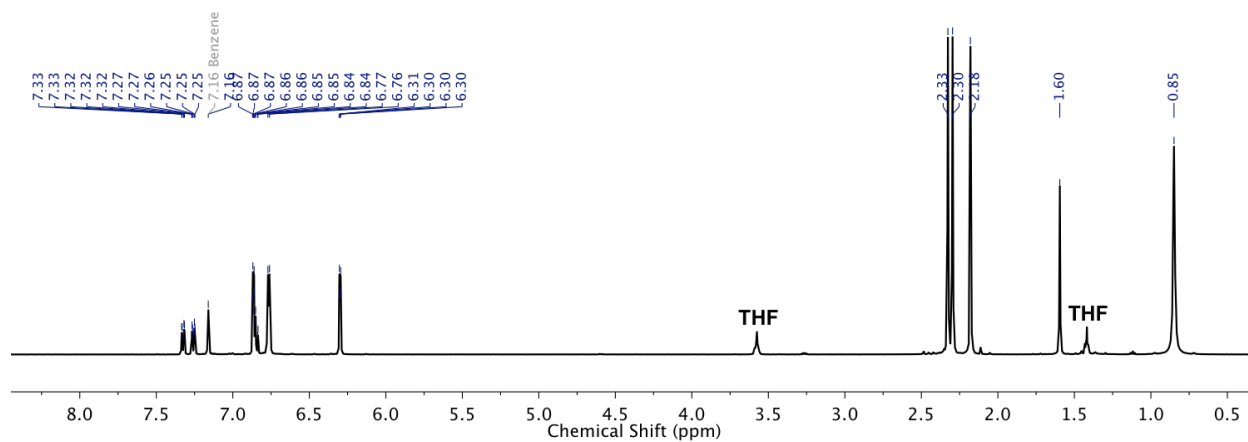

Figure S-35.  $^1\text{H}$  NMR spectrum of  $(^{\text{Mes}}\text{dmx})\text{Cu}_2(\text{CN}^t\text{Bu})_2$  (**14**), (600 MHz,  $\text{C}_6\text{D}_6$ ).

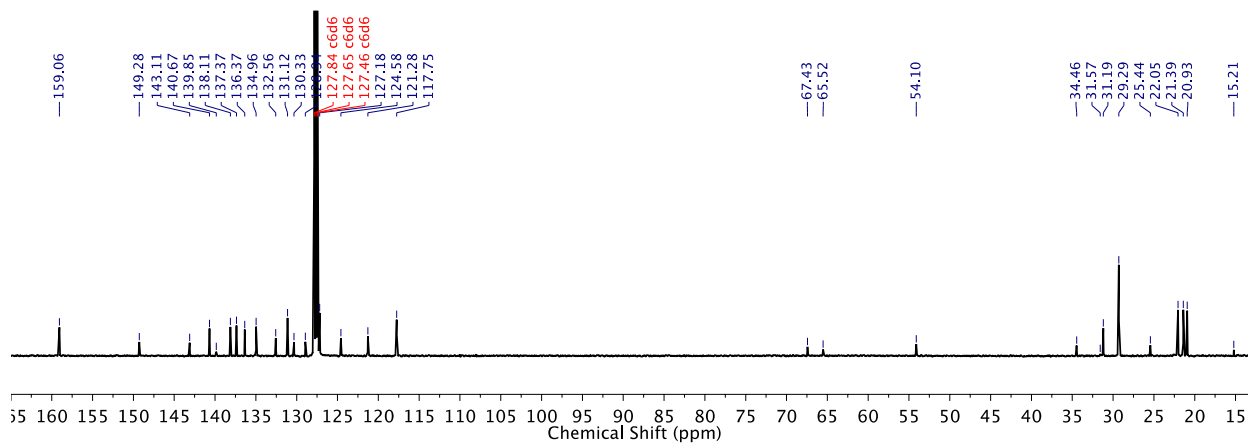

Figure S-36.  $^{13}\text{C}$  NMR spectrum of  $(^{\text{Mes}}\text{dmx})\text{Cu}_2(\text{CN}^t\text{Bu})_2$  (**14**), (125 MHz,  $\text{C}_6\text{D}_6$ ).

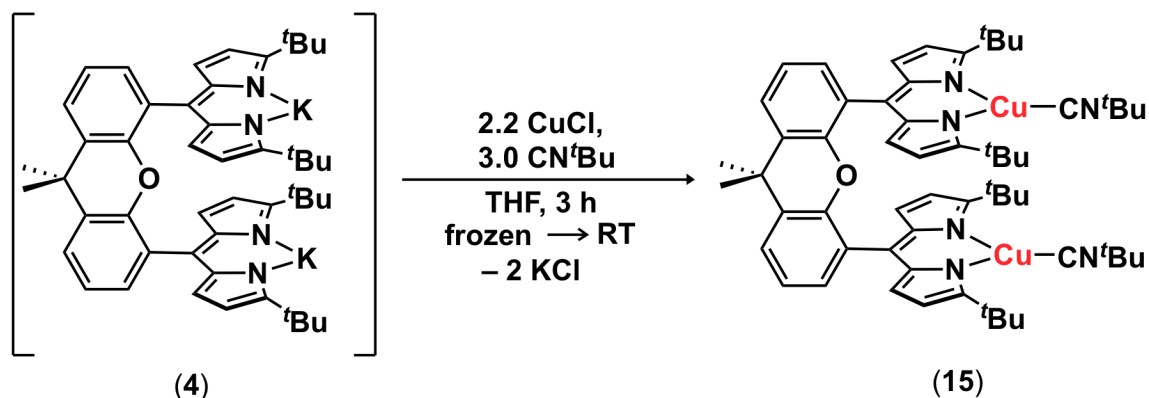

(<sup>t</sup>Bu<sub>dmx</sub>)Cu<sub>2</sub>(CN<sup>t</sup>Bu)<sub>2</sub> (**15**). In the drybox, to a thawing suspension of **9** (0.100 g, 0.126 mmol, 1.0 equiv.) in tetrahydrofuran (2 mL) was added *tert*-butyl isocyanide (CN<sup>t</sup>Bu; 0.0310 g, 0.378 mmol, 3.0 equiv.) followed by rapid addition of cuprous chloride (0.0270 g, 0.277 mmol, 2.2 equiv.). Over 1 h, homogenization and a color change to bright orange were noted. The solution was filtered through a pad of Celite and dried *in vacuo*. The residual solids were dissolved in benzene (2 mL) and lyophilized. The resulting powder was suspended in hexanes and filtered through a pad of Celite, followed by rinsing with hexanes (*ca.* 1 mL) and acetonitrile (*ca.* 3 mL). The residual powder was eluted with benzene and lyophilized to afford (<sup>t</sup>Bu<sub>dmx</sub>)Cu<sub>2</sub>(CN<sup>t</sup>Bu)<sub>2</sub> (**15**) as a bright orange solid (0.121 g, 87 %). Single crystals suitable for X-ray diffraction were obtained by allowing a concentrated solution tetrahydrofuran/hexanes solution of **15** to stand overnight at  $-35\text{ }^{\circ}\text{C}$ . <sup>1</sup>H NMR (600 MHz, C<sub>6</sub>D<sub>6</sub>):  $\delta$  7.19 (ddd,  $J = 13.0, 7.5, 1.6$  Hz, dipyrin C–H), 6.77 (t,  $J = 7.5$  Hz, xanthene C–H), 6.66 (d,  $J = 4.1$  Hz, 4H, xanthene C–H), 6.36 (dd,  $J = 4.1, 0.7$  Hz, 4H, dipyrin C–H), 1.71 (s, 36H, dipyrin *tert*-butyl C–H), 1.56 (s, 6H, xanthene methyl C–H), 0.95 (s, 18H, isocyanide *tert*-butyl C–H). <sup>13</sup>C NMR (150 MHz, C<sub>6</sub>D<sub>6</sub>):  $\delta$  171.62, 151.54, 144.44, 143.19, 134.92, 134.03, 132.58, 132.14, 127.36, 123.70, 115.99, 36.77, 34.43, 32.00. Calculated for C<sub>59</sub>H<sub>74</sub>Cu<sub>2</sub>N<sub>6</sub>O: C 70.14 H 7.38 N 8.32; Found: C 70.18 H 7.50 N 8.14.

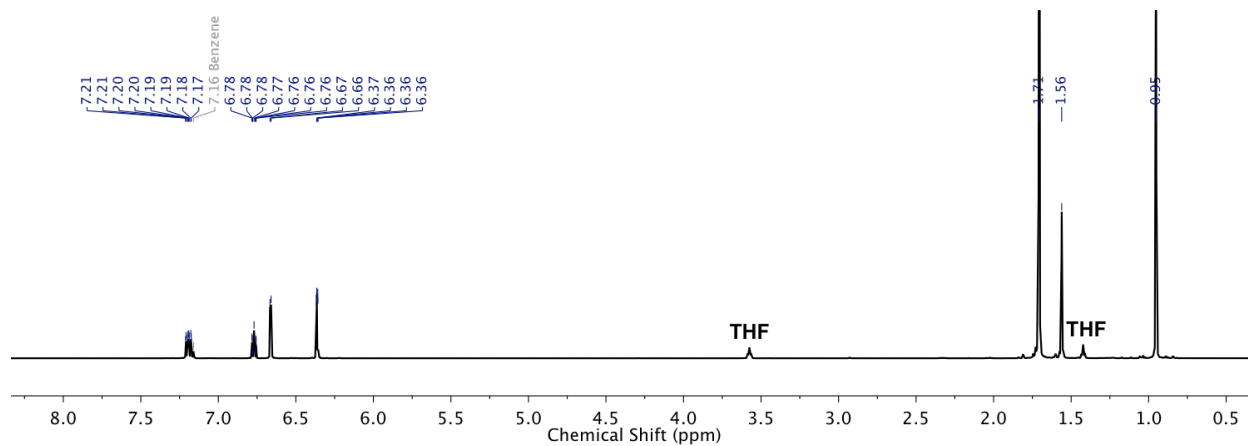

Figure S-37.  $^1\text{H}$  NMR spectrum of  $(t\text{Bu dmx})\text{Cu}_2(\text{CN}^t\text{Bu})_2$  (**15**), (600 MHz,  $\text{C}_6\text{D}_6$ ).

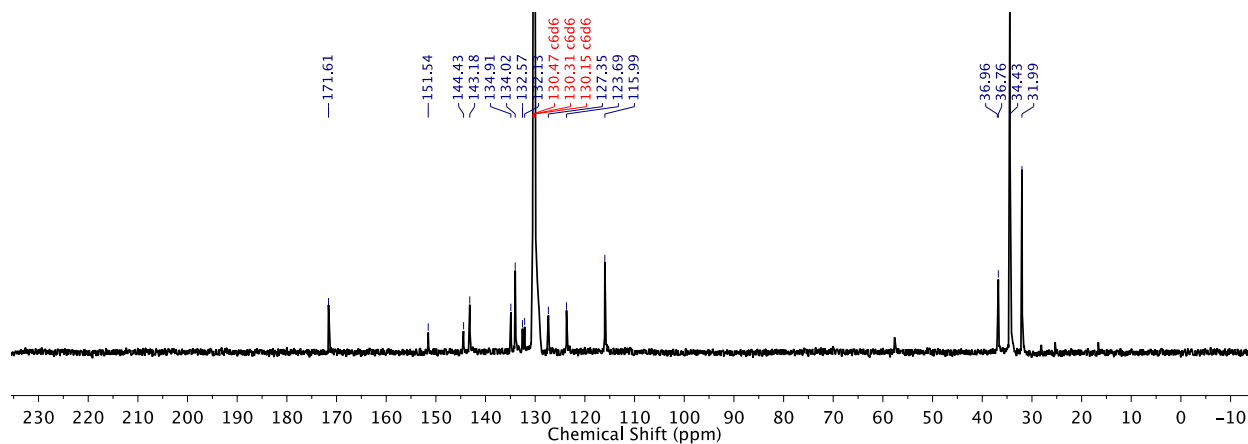

Figure S-38.  $^{13}\text{C}$  NMR spectrum of  $(t\text{Bu dmx})\text{Cu}_2(\text{CN}^t\text{Bu})_2$  (**15**), (125 MHz,  $\text{C}_6\text{D}_6$ ).



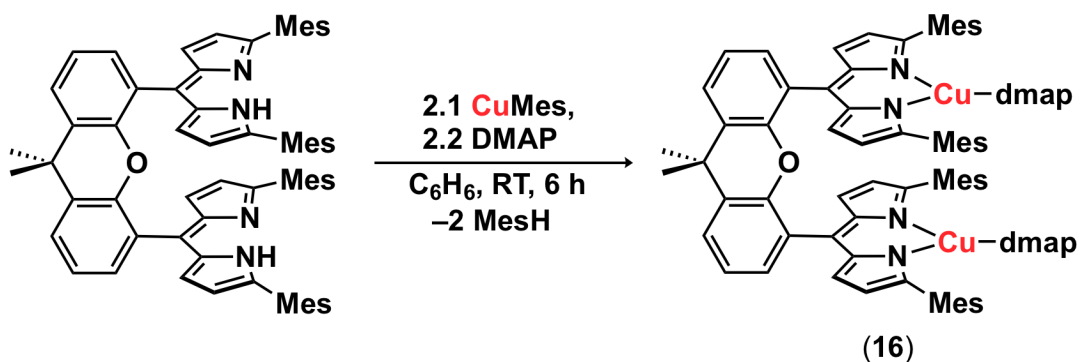

(<sup>Mes</sup>dmx)Cu<sub>2</sub>(dmap)<sub>2</sub> (**16**). In the drybox, mesitylcopper<sup>10</sup> (CuMes; 0.029 g, 0.153 mmol, 2.1 equiv) and 4-dimethylaminopyridine (DMAP; 0.020 g, 0.160 mmol, 2.2 equiv.) were combined in benzene to produce an off-yellow suspension. To this mixture was added (<sup>Mes</sup>dmx)<sub>2</sub> (0.070 mg, 0.073 mmol, 1.0 equiv.) as a solid. Over 6 h, homogenization and color change from red-orange to maroon was noted. The reaction was filtered through a pad of Celite and lyophilized. The resulting powder was suspended in hexanes and filtered over a pad of Celite, following by rinsing with hexanes (*ca.* 5 mL). The residual powder was eluted with benzene and lyophilized to afford (<sup>Mes</sup>dmx)Cu<sub>2</sub>(dmap)<sub>2</sub> (**16**) as a deep red solid (0.090 g; 85 %). Single crystals suitable for X-ray diffraction were obtained by allowing a concentrated diethyl ether/hexanes solution of **6** to stand overnight at  $-35$  °C. <sup>1</sup>H NMR (600 MHz, C<sub>6</sub>D<sub>6</sub>):  $\delta$  7.49 (dd,  $J = 7.4, 1.7$  Hz, 2H, dipyrroin C–H), 7.26 (dd,  $J = 7.8, 1.7$  Hz, 2H, dipyrroin C–H), 7.01 (dd,  $J = 4.0, 0.7$  Hz, 4H, xanthene C–H), 6.93 (t,  $J = 7.48$  Hz, 2H, xanthene C–H), 6.62 – 6.66 (m, 12H, overlapping mesityl aryl C–H and pyridine C–H), 6.35 (dd,  $J = 4.0, 0.7$  Hz, 4H, dipyrroin C–H), 5.54 (d,  $J = 6.1$  Hz, 4H, pyridine C–H), 2.41 (s, 12H, dimethylamino C–H) 2.26 (s, 12H, mesityl para-methyl C–H), 2.04 – 2.06 (s, 24H, mesityl ortho-methyl C–H), 1.63 (xanthene methyl C–H). <sup>13</sup>C NMR (125 MHz, C<sub>6</sub>D<sub>6</sub>):  $\delta$  157.74, 152.35, 150.44, 149.55, 143.31, 141.60, 138.39, 137.57, 136.96, 135.11, 132.86, 131.28, 130.43, 130.18, 124.23, 121.17, 117.50, 105.04, 37.66, 34.57, 31.57, 31.18, 22.03, 21.07, 20.79. Calculated for C<sub>83</sub>H<sub>84</sub>Cu<sub>2</sub>N<sub>8</sub>O: C 74.58 H 6.33 N 8.38; Found: C 74.46 H 6.36 N 8.75.

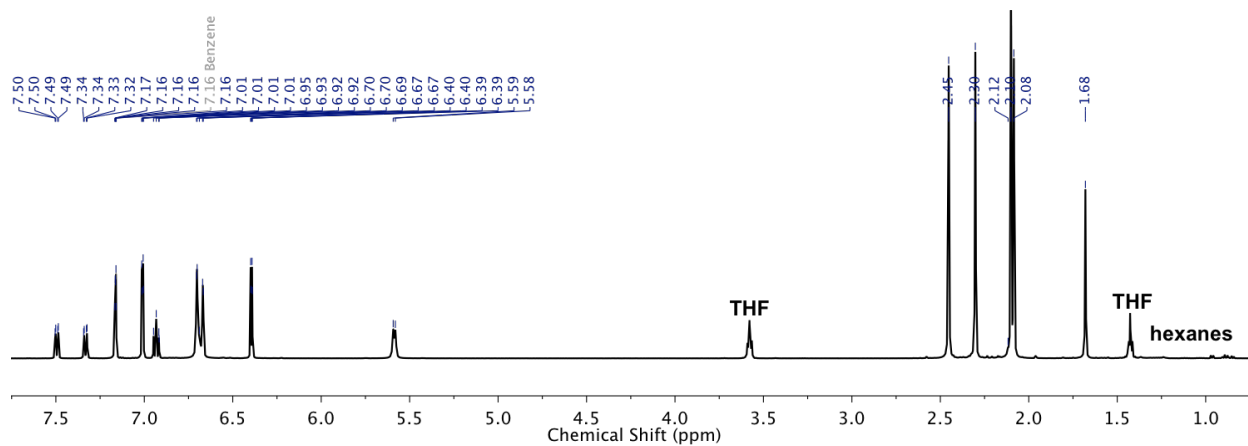

**Figure S–39.**  $^1\text{H}$  NMR spectrum of  $(^{\text{Mes}}\text{dmx})\text{Cu}_2(\text{dmap})_2$  (**16**), (600 MHz,  $\text{C}_6\text{D}_6$ ).

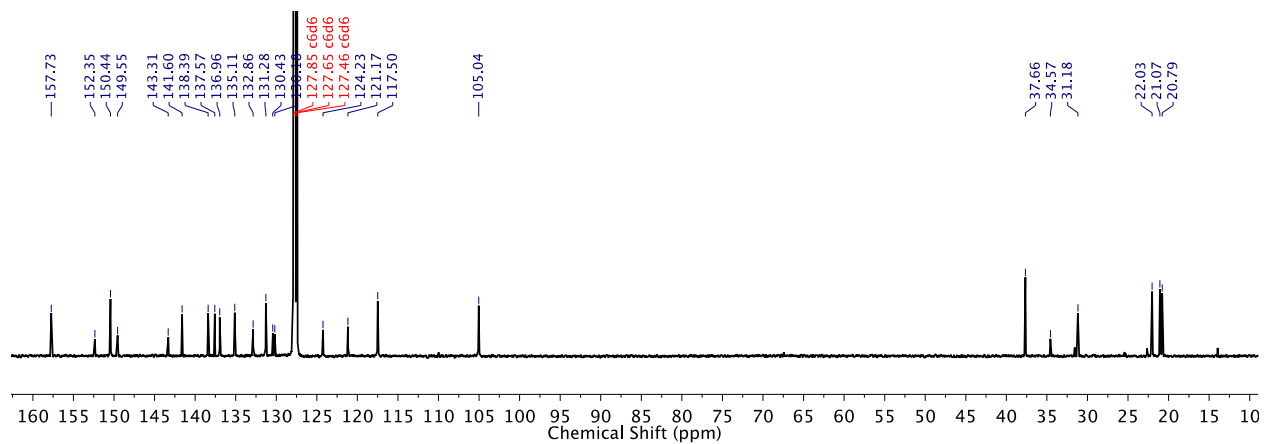

**Figure S–40.**  $^{13}\text{C}$  NMR spectrum of  $(^{\text{Mes}}\text{dmx})\text{Cu}_2(\text{dmap})_2$  (**16**), (125 MHz,  $\text{C}_6\text{D}_6$ ).

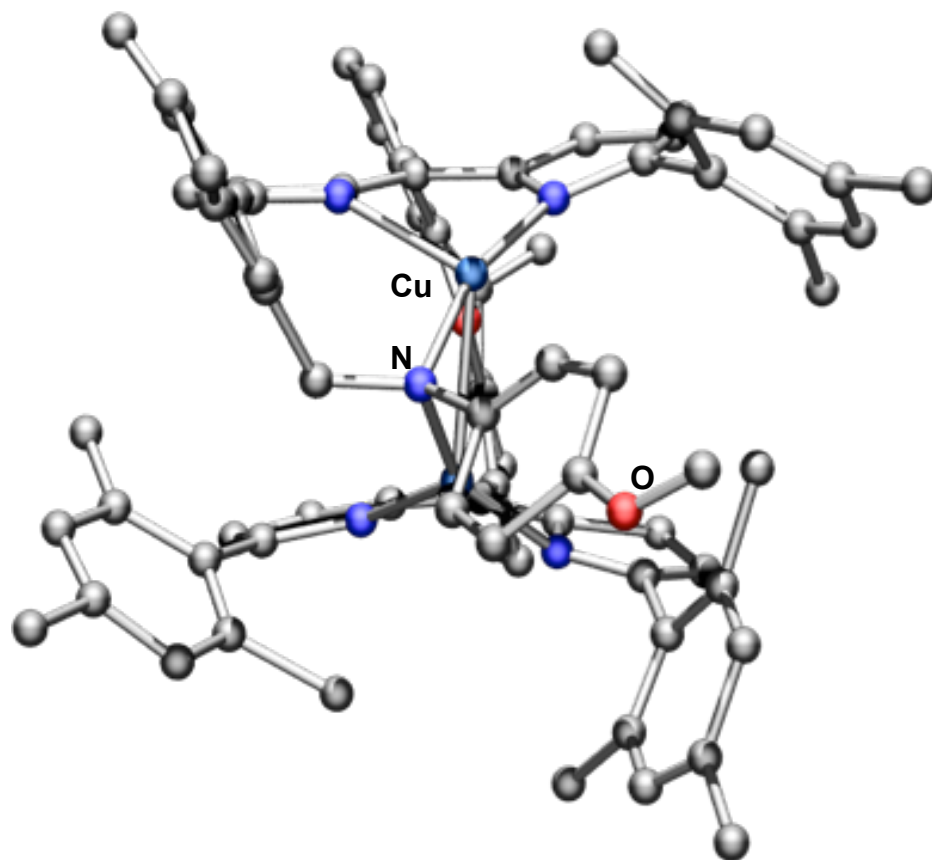

**Figure S–41.** Solid-state molecular structure of benzylic C–H aminated complex (**17**) from thermal decomposition of **7**, crystallized from vapor diffusion of diethyl ether into a concentrated solution of **7** in tetrahydrofuran at room temperature over one week. Hydrogen atoms,  $K(C_{222})$  counterion, and solvent molecules in the unit cell are omitted for clarity.

*Note I:* The existence of multi-component non-Merohedral twinning prevents full anisotropic refinement of all atoms, which was prevalent over multiple data set collections. Nonetheless, this structure establishes intramolecular C–H amination of a proximal benzylic C–H bond to have occurred. *Unit Cell Parameters:* Triclinic ( $P\bar{1}$ ),  $a = 19.197(3) \text{ \AA}$ ,  $b = 19.206(3) \text{ \AA}$ ,  $c = 26.465(5) \text{ \AA}$ ,  $\alpha = 100.707(6)^\circ$ ,  $\beta = 108.207(4)^\circ$ ,  $\gamma = 95.461(4)^\circ$ ;  $V = 8984(3) \text{ \AA}^3$ .

*Note II:* formation of **17** proceeds with loss of a hydrogen atom. Due to the inability of the dipyrin ligand platform to support zero-valent copper, we propose C–N bond formation proceeds by initial H-atom abstraction from a benzylic methyl group, followed by loss of a hydrogen atom and radical recombination.

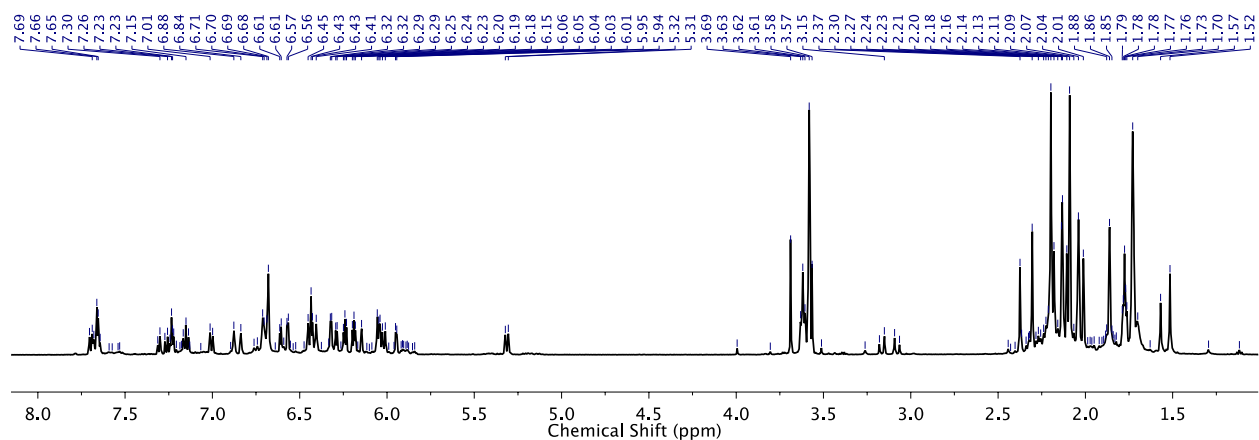

**Figure S-42.**  $^1\text{H}$  NMR spectrum of intramolecular benzylic C-H amination decomposition from **7** to furnish **17** alongside minor components of unidentified species (500 MHz,  $\text{d}_8\text{-THF}$ ).

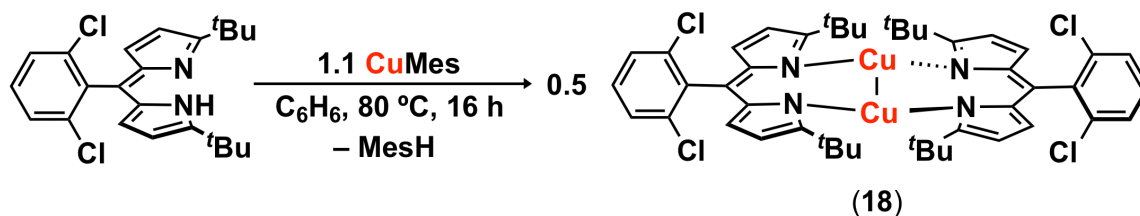

$({}^t\text{BuL})_2\text{Cu}_2$  (**18**). In the drybox, to a Schlenk tube charged with a solution of  $({}^t\text{BuL})\text{H}$  (0.256 g, 0.632 mmol, 1.0 equiv.) in benzene (2.0 mL) was added mesitylcopper<sup>10</sup> (0.127 g, 0.696 mmol, 1.1 equiv.). The reaction vessel was sealed, exported from the drybox, and heated to 100 °C for 16 h, accompanied by a gradual color change from red-orange to red-pink. The Schlenk tube was subsequently removed from heat and allowed to stand at room temperature undisturbed for 8 h, during which precipitation of a crystalline solid was noted. The Schlenk tube was imported into the drybox, and the resulting solids were collected and rinsed with thawing benzene (*ca.* 5 mL) and cold hexanes (*ca.* 2 mL) to afford  $({}^t\text{BuL})_2\text{Cu}_2$  (**18**) as dark red crystals (0.225 g, 77 %). Single crystals suitable for X-ray diffraction were obtained by allowing a concentrated 2:1 hexane/benzene solution of **18** to stand overnight at –35 °C. <sup>1</sup>H NMR (600 MHz, C<sub>6</sub>D<sub>6</sub>): 6.95 (d, *J* = 8.1 Hz, 4*H*, dipyrin C–*H*), 6.53 (t, *J* = 8.1 Hz, 2*H*, aryl C–*H*), 6.48 (d, *J* = 4.4 Hz, 4*H*, aryl C–*H*), 6.34 (d, *J* = 4.4 Hz, 4*H*, dipyrin C–*H*), 1.35 (s, 36*H*, *tert*-butyl C–*H*). <sup>13</sup>C NMR (125 MHz, C<sub>6</sub>D<sub>6</sub>): δ 175.28, 145.31, 144.53, 142.54, 139.17, 135.56, 131.64, 129.90, 36.49, 33.38. Calculated for C<sub>46</sub>H<sub>50</sub>Cl<sub>4</sub>Cu<sub>2</sub>N<sub>4</sub>: C 59.55, H 5.43, N 6.04; Found: C 59.63, H 5.29, N 6.18.

*Note:* Fragmentation of **18** is reversible, evident by formation of **10** upon treatment of **18** with acetonitrile and by formation of **18** upon heating **10** in the absence of excess acetonitrile.

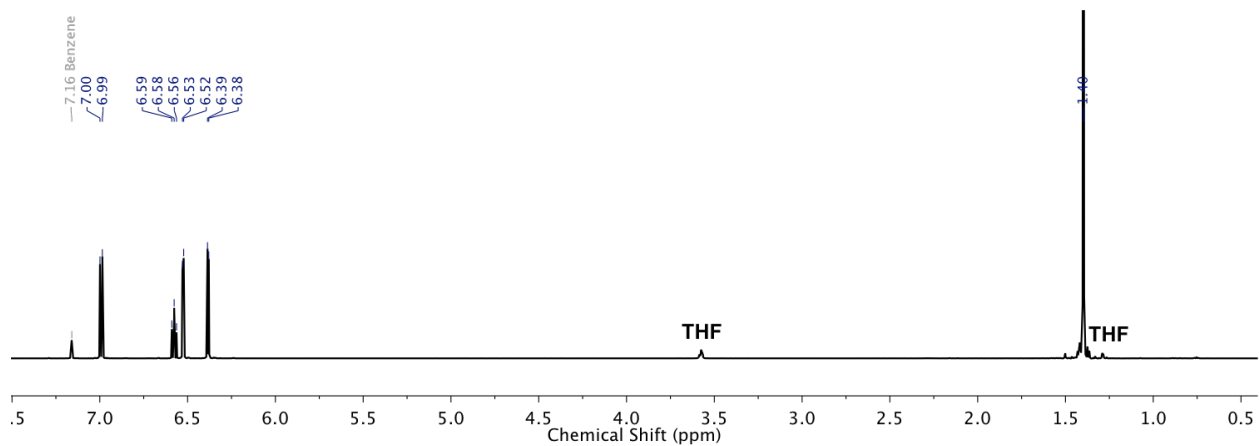

**Figure S-43.**  $^1\text{H}$  NMR spectrum of  $(t\text{BuL})_2\text{Cu}_2$  (**18**), (500 MHz,  $\text{C}_6\text{D}_6$ ).

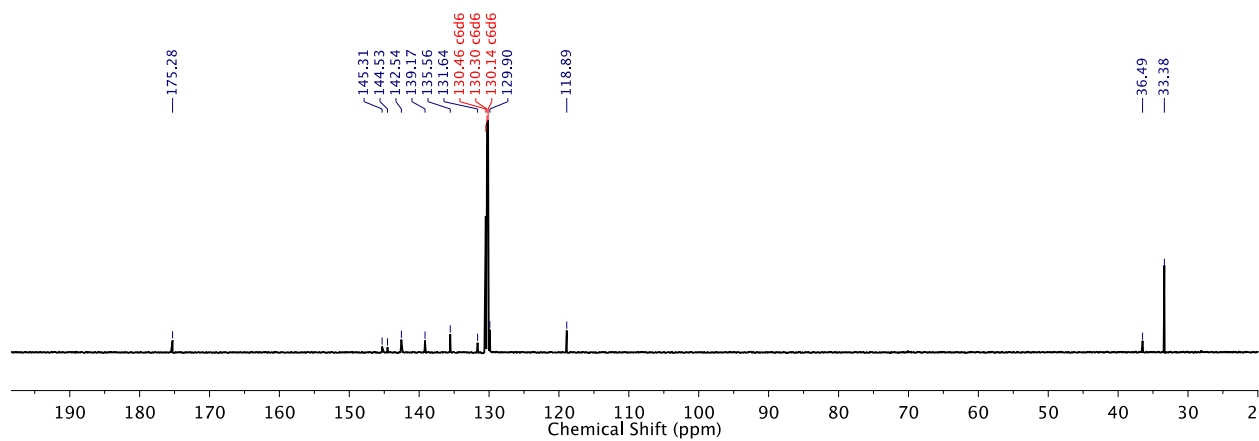

**Figure S-44.**  $^{13}\text{C}$  NMR spectrum of  $(t\text{BuL})_2\text{Cu}_2$  (**18**), (125 MHz,  $\text{C}_6\text{D}_6$ ).

## Stoichiometric Reactions.

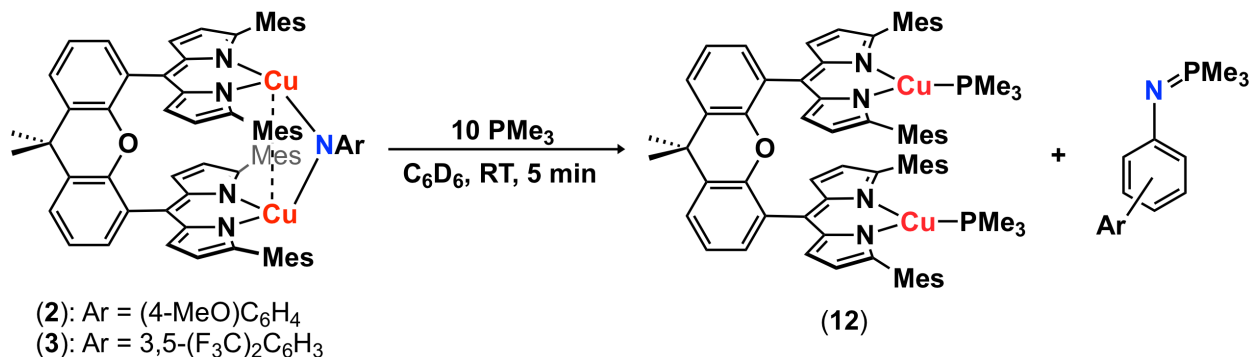

**Trimethylphosphine ( $\text{PMe}_3$ ) Reactivity from 2 and 3.** In the drybox, to a benzene solution of either 2 (9.9 mg, 0.008 mmol, 1.0 equiv.) or 3 (9.2 mg, 0.008 mmol, 1.0 equiv.) in a J. Young tube was added neat trimethylphosphine (5.8 mg, 7.8  $\mu\text{L}$ , 0.080 mmol, 10 equiv.). A stark color change from purple to pink was observed upon inversion of the J-Young tube. After 5 minutes, complete consumption of the starting material, quantitative conversion to ( $^{\text{Mes}}\text{dmx}$ ) $\text{Cu}_2(\text{PMe}_3)_2$  (12) and formation of the respective phosphinimide (2:  $\text{Me}_3\text{P}(\text{N}(\text{C}_6\text{H}_4\text{OMe}))$ , 3:  $\text{Me}_3\text{P}(\text{N}(3,5\text{-(CF}_3)_2\text{C}_6\text{H}_3))$ ) were confirmed by  $^1\text{H}$ ,  $^{31}\text{P}$ , and  $^{19}\text{F}$  NMR comparison to authentic samples. Featureless EPR spectra confirm the absence of half-integer-spin paramagnetic impurities.

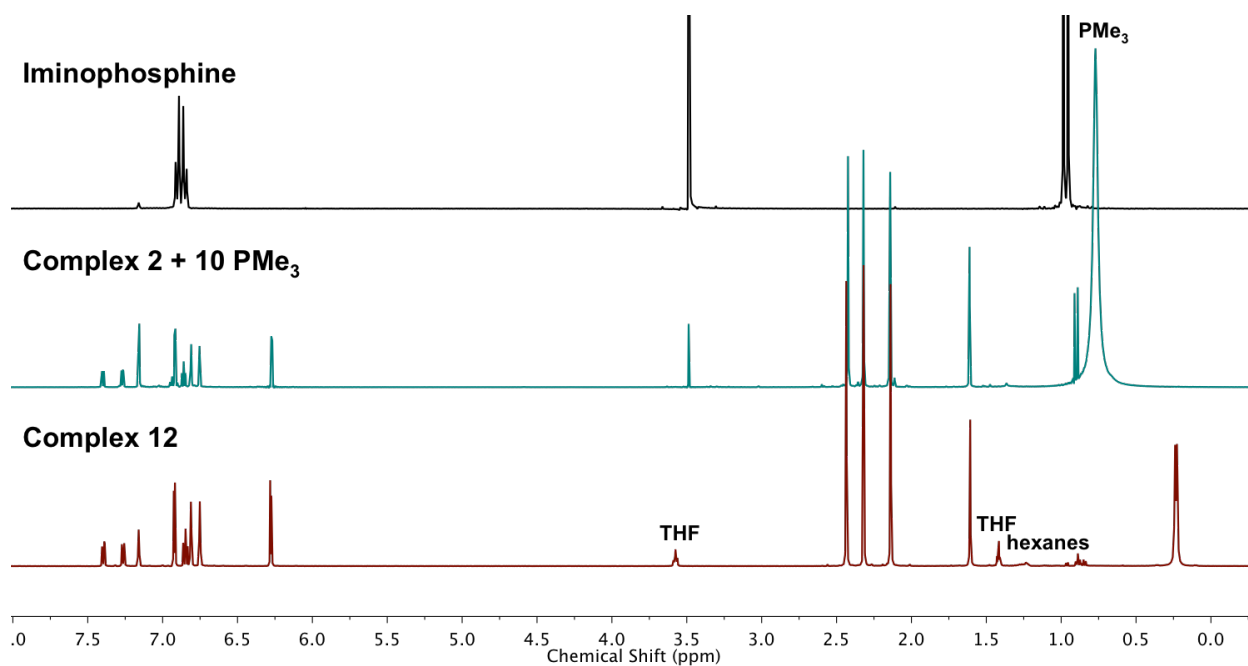

**Figure S-45.** Representative  $^1\text{H}$  NMR spectra overlay of authentically prepared  $(^{\text{Mes}}\text{dmX})\text{Cu}_2(\text{PMe}_3)_2$  (**4**, *red*, bottom spectrum), crude reaction mixture of  $(^{\text{Mes}}\text{dmX})\text{Cu}_2(\text{N}(\text{C}_6\text{H}_4\text{OMe}))$  (**2**, *cyan*, middle spectrum) with excess trimethylphosphine, and authentic  $\text{Me}_3\text{P}(\text{N}(\text{C}_6\text{H}_4\text{OMe}))$  (*black*, top spectrum), (600 MHz,  $\text{C}_6\text{D}_6$ ).



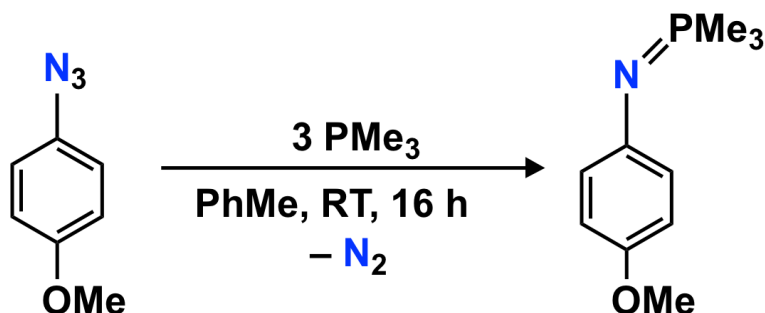

**N-(4-methoxyphenyl)-1,1,1-trimethyl- $\lambda^5$ -phosphanimine (Me<sub>3</sub>P(N(4-OMe-C<sub>6</sub>H<sub>4</sub>)))**, Adapted from a literature procedure,<sup>17</sup> in the drybox, to a solution of 4-methoxyphenyl azide (0.061 g, 0.41 mmol, 1.0 equiv.) in toluene (2 mL) was added dropwise excess trimethylphosphine (0.094 g, 1.2 mmol, 3.0 equiv.), accompanied by rapid effervescence. The reaction was stirred overnight at ambient temperature, followed by filtration through Celite and removal of solvent *in vacuo* to afford the title compound as a yellow solid (79 mg, 98 %). <sup>1</sup>H NMR (400 MHz, C<sub>6</sub>D<sub>6</sub>):  $\delta$  6.84 (m, 4H, aryl C–H), 3.44 (s, 3H, methoxy C–H), 0.93 (dd, 9H,  $J = 12.4, 1.4$  Hz, trimethylphosphine C–H). <sup>31</sup>P NMR (160 MHz, C<sub>6</sub>D<sub>6</sub>):  $\delta$  1.60 (s, PMe<sub>3</sub>). <sup>13</sup>C NMR (125 MHz, C<sub>6</sub>D<sub>6</sub>):  $\delta$  151.88, 146.74, 146.71, 123.10, 123.00, 122.95, 114.88, 114.80, 114.76, 55.21, 55.12, 15.97, 15.91, 15.86, 15.43, 15.33. HRMS (ESI<sup>+</sup>)  $m/z$  Calc. 198.1042 [C<sub>10</sub>H<sub>16</sub>NOP + H<sup>+</sup>], Found 198.1038 [M + H]<sup>+</sup>.

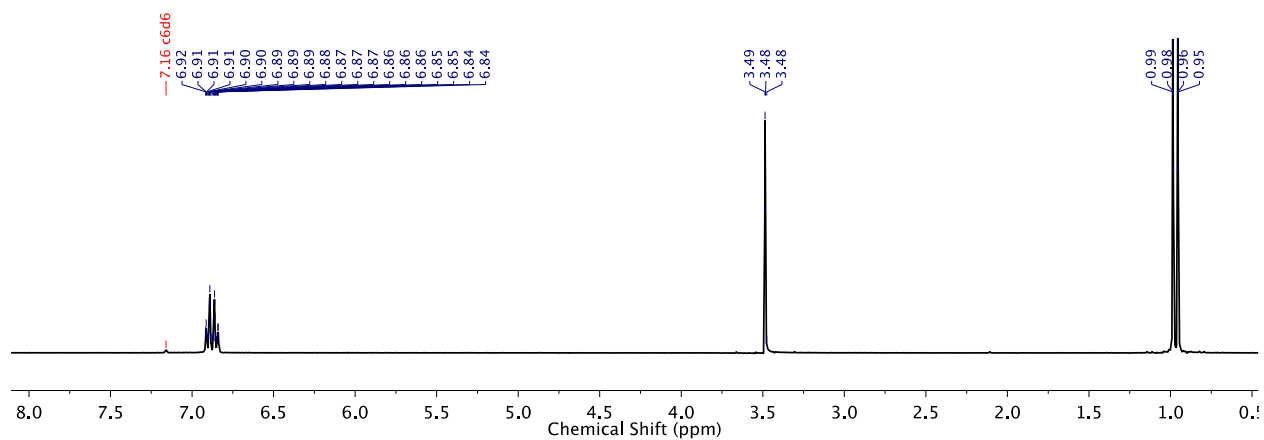

**Figure S-46.**  $^1\text{H}$  NMR spectrum of  $\text{Me}_3\text{P}(\text{N}(\text{C}_6\text{H}_4\text{OMe}))$ , (400 MHz,  $\text{C}_6\text{D}_6$ ).

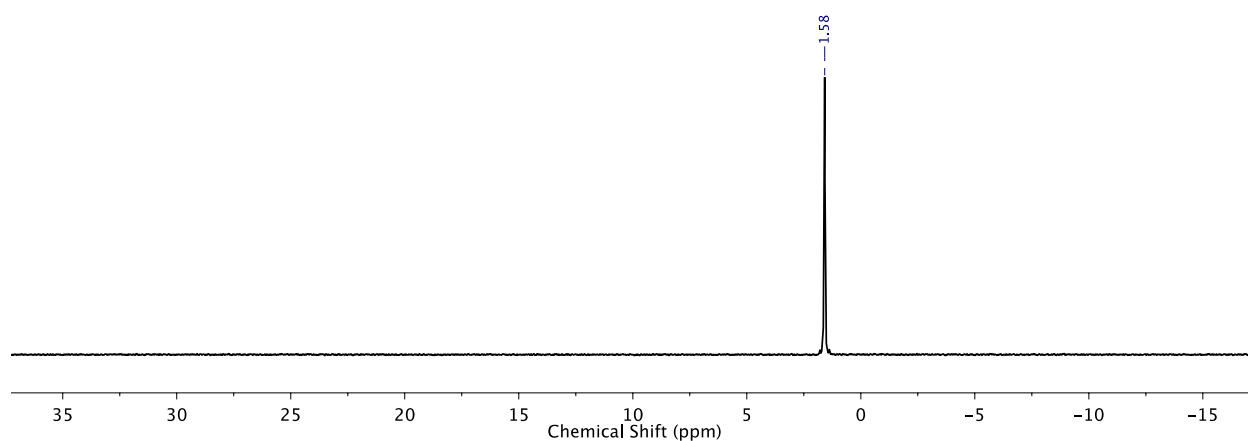

**Figure S-47.**  $^{31}\text{P}$  NMR spectrum of  $\text{Me}_3\text{P}(\text{N}(\text{C}_6\text{H}_4\text{OMe}))$ , (160 MHz,  $\text{C}_6\text{D}_6$ ).

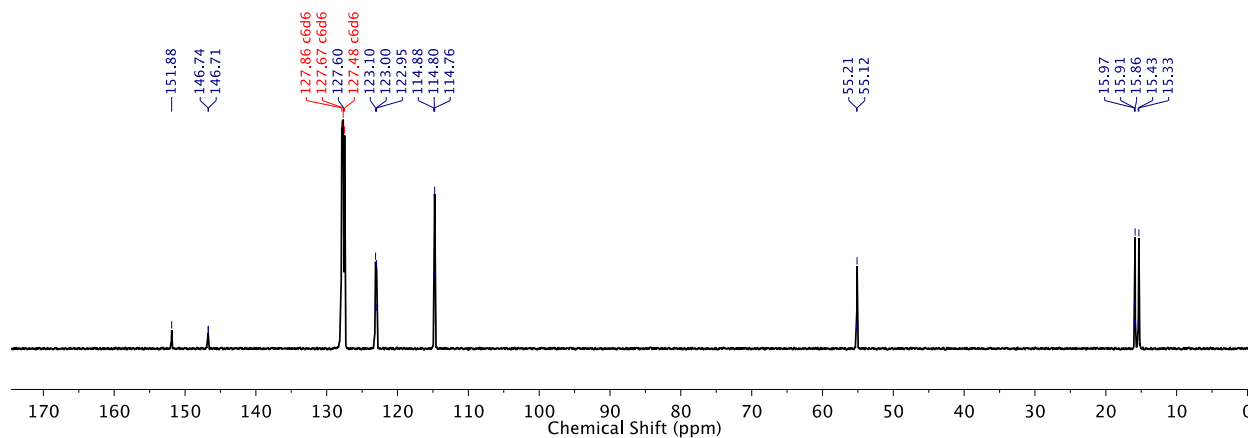

**Figure S-48.**  $^{13}\text{C}$  NMR spectrum of  $\text{Me}_3\text{P}(\text{N}(\text{C}_6\text{H}_4\text{OMe}))$ , (125 MHz,  $\text{C}_6\text{D}_6$ ).

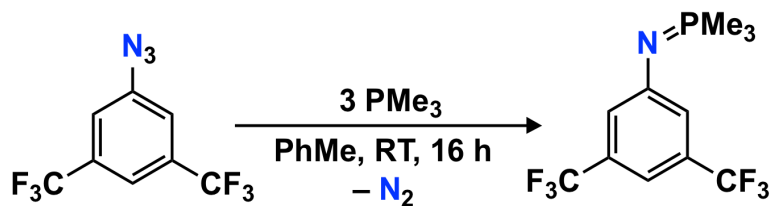

*N*-(3,5-bis(trifluoromethyl)phenyl)-1,1,1-trimethyl- $\lambda^5$ -phosphanimine ( $\text{Me}_3\text{P}(\text{N}(3,5\text{-(F}_3\text{C)}_2\text{C}_6\text{H}_3))$ ). In the drybox, to a thawing solution of 3,5-bis(trifluoromethyl)phenyl azide (0.080 g, 0.31 mmol, 1.0 equiv) in toluene (3 mL) was added dropwise trimethylphosphine (0.072 g, 0.95 mmol, 3.0 equiv), accompanied by effervescence. The reaction was stirred overnight at ambient temperature, followed by filtration through Celite and removal of solvent *in vacuo* to afford the title compound as a white solid (94 mg, 99 %).  $^1\text{H}$  NMR (400 MHz,  $\text{C}_6\text{D}_6$ ):  $\delta$  7.28 (s, 1H, aryl C–H), 7.13 (s, 2H, aryl C–H), 0.93 (dd, 9H,  $J = 12.4, 1.4$  Hz, trimethylphosphine C–H).  $^{31}\text{P}$  NMR (160 MHz,  $\text{C}_6\text{D}_6$ ):  $\delta$  9.11 (s,  $\text{PMe}_3$ ).  $^{19}\text{F}$  NMR (375 MHz,  $\text{C}_6\text{D}_6$ ):  $\delta$  -62.6 (s, aryl  $\text{CF}_3$ ).  $^{13}\text{C}$  NMR (125 MHz,  $\text{C}_6\text{D}_6$ ):  $\delta$  154.69, 132.07, 131.81, 125.56, 123.40, 121.47, 121.31, 108.44, 14.80, 14.26. HRMS (ESI $^+$ )  $m/z$  Calc. 304.0684 [ $\text{C}_{11}\text{H}_{13}\text{F}_6\text{NP} + \text{H}^+$ ], Found 304.0695 [ $\text{M} + \text{H}$ ] $^+$ .

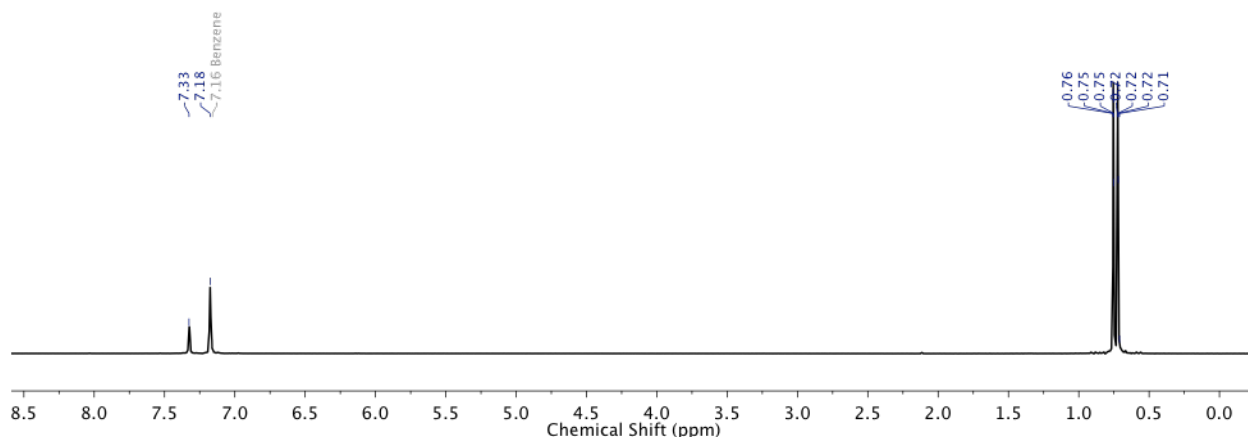

**Figure S–49.**  $^1\text{H}$  NMR spectrum of  $\text{Me}_3\text{P}(\text{N}(3,5\text{-(CF}_3)_2\text{C}_6\text{H}_3))$ , (400 MHz,  $\text{C}_6\text{D}_6$ ).

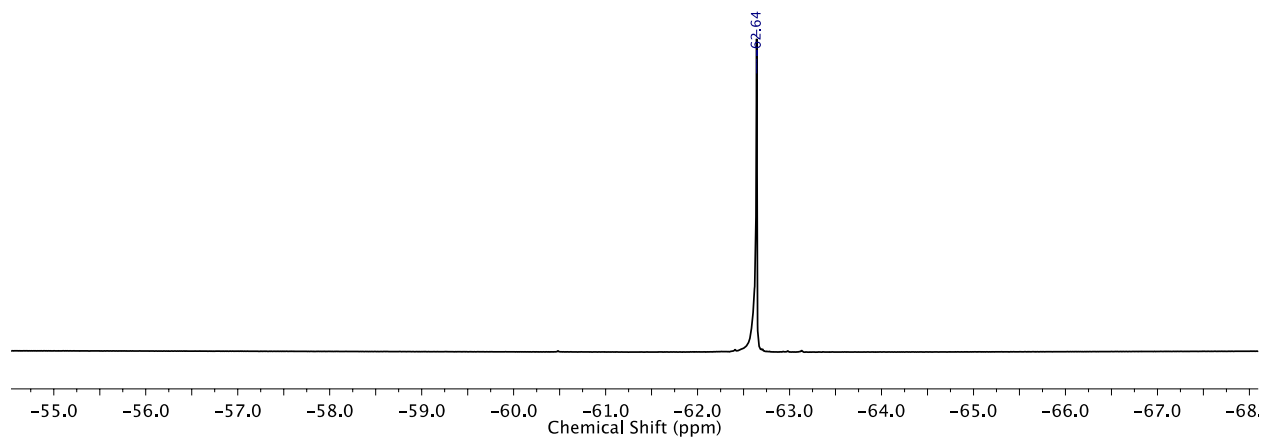

**Figure S-50.**  $^{19}\text{F}$  NMR spectrum of  $\text{Me}_3\text{P}(\text{N}(3,5\text{-(CF}_3)_2\text{C}_6\text{H}_3))$ , (375 MHz,  $\text{C}_6\text{D}_6$ ).

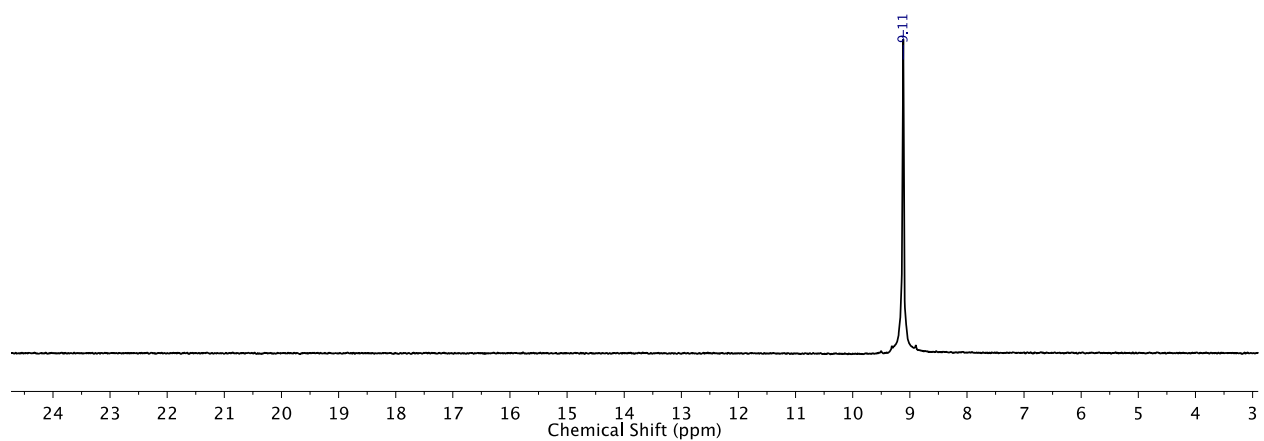

**Figure S-51.**  $^{31}\text{P}$  NMR spectrum of  $\text{Me}_3\text{P}(\text{N}(3,5\text{-(CF}_3)_2\text{C}_6\text{H}_3))$ , (160 MHz,  $\text{C}_6\text{D}_6$ ).

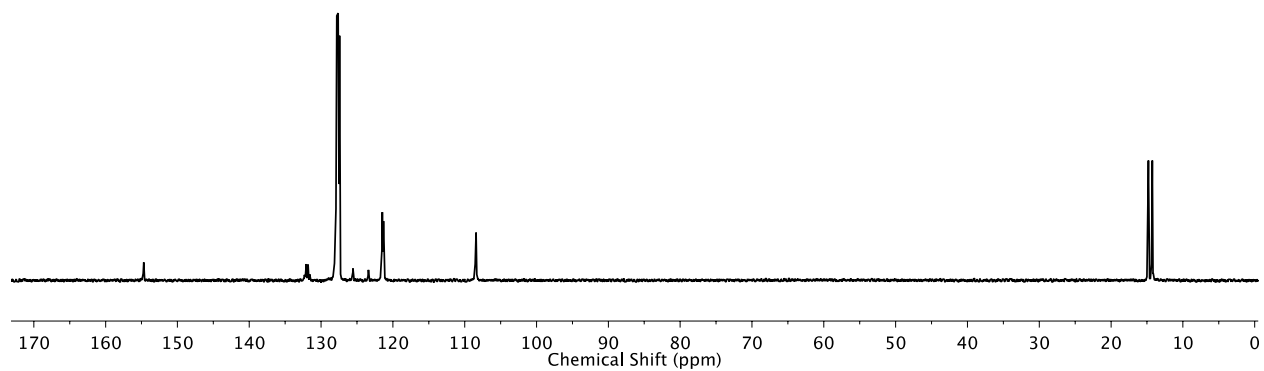

**Figure S-52.**  $^{13}\text{C}$  NMR spectrum of  $\text{Me}_3\text{P}(\text{N}(3,5\text{-(CF}_3)_2\text{C}_6\text{H}_3))$ , (125 MHz,  $\text{C}_6\text{D}_6$ ).

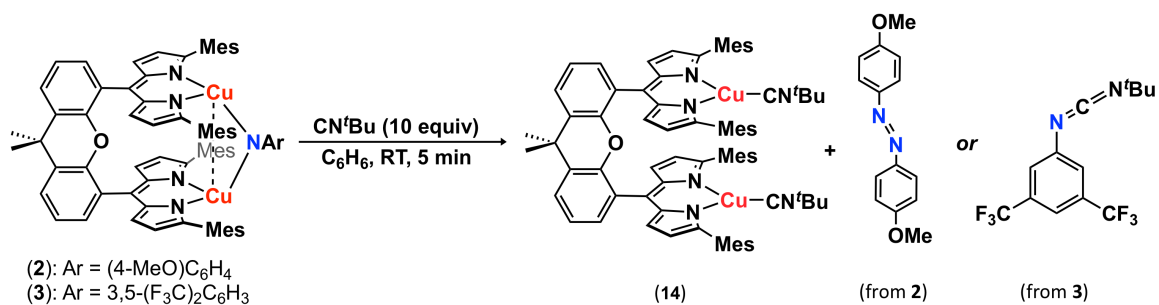

***Tert*-butyl Isocyanide (CN<sup>t</sup>Bu) Reactivity from 2 and 3.** In the drybox, to a benzene solution of either **2** (10.0 mg, 0.008 mmol, 1.0 equiv.) or **3** (9.2 mg, 0.008 mmol, 1.0 equiv.) in a J. Young tube was added neat *tert*-butyl isocyanide (6.9 mg, 0.080 mmol, 10 equiv.). A stark color change from purple to orange was observed upon inversion of the J. Young tube. <sup>1</sup>H-NMR spectroscopy revealed complete consumption of the starting material and conversion to (Mes<sub>2</sub>dmx)Cu<sub>2</sub>(CN<sup>t</sup>Bu)<sub>2</sub> (**14**), accompanied by formation of either 1,2-bis(4-methoxyphenyl)diazene (exclusively from **2**) or *N*-(3,5-bis(trifluoromethyl)phenyl)-*N*-(*tert*-butyl)methanediimine (exclusively from **3**). Spectral data of both organic products are consistent with previously reported characterization data.<sup>18,19</sup> *Note:* The reactivity of **3** with excess CN<sup>t</sup>Bu is accompanied by formation of an unidentified paramagnetic species, which exhibits an EPR spectrum that has not yet been satisfactorily modeled. The presence of a paramagnetic species may account for the non-quantitative yield of azoarene. The yield of carbodiimide from **3** is maximized upon dissolution of **3** in neat CN<sup>t</sup>Bu, accompanied by partial ligand protonolysis from adventitious water.

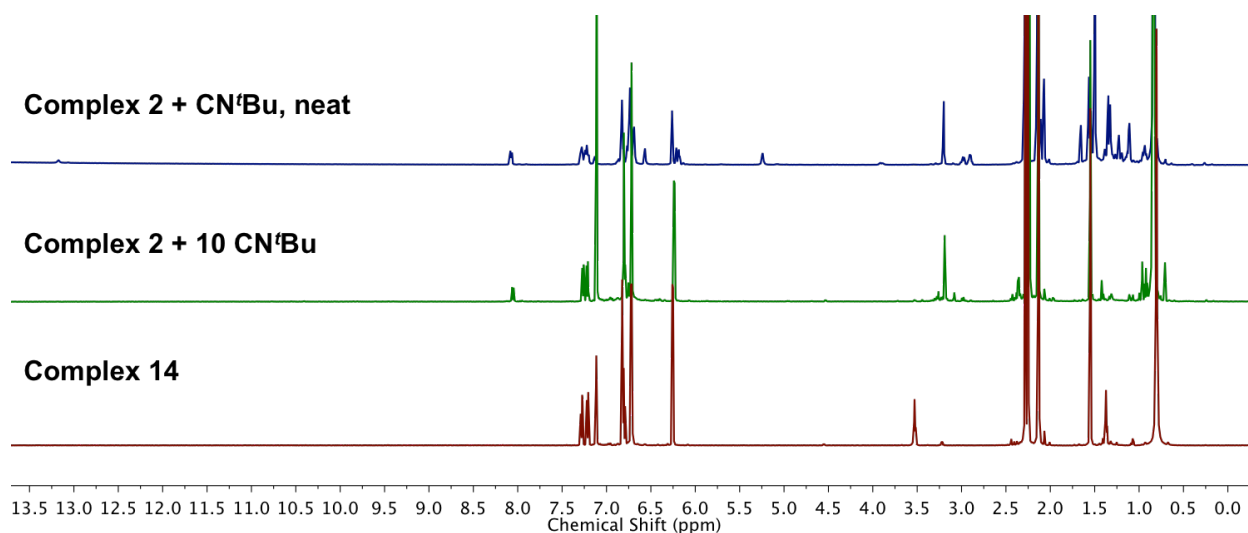

**Figure S-53.**  $^1\text{H}$  NMR spectra overlay of authentically prepared  $(^{\text{Mes}}\text{dmx})\text{Cu}_2(\text{CN}^t\text{Bu})_2$  (**14**, *red*, bottom spectrum), crude reaction mixture of  $(^{\text{Mes}}\text{dmx})\text{Cu}_2(\mu^2\text{-N}(4\text{-MeOC}_6\text{H}_4))$  (**2**) with moderate excess of  $\text{CN}^t\text{Bu}$  ( $\sim 10$  equiv) (*green*, middle spectrum), crude reaction mixture of  $(^{\text{Mes}}\text{dmx})\text{Cu}_2(\mu^2\text{-N}(4\text{-MeOC}_6\text{H}_4))$  (**2**) dissolved in neat  $\text{CN}^t\text{Bu}$  (*blue*, top spectrum), (500 MHz,  $\text{C}_6\text{D}_6$ ). The addition proton resonances in the reaction of **2** with neat  $\text{CN}^t\text{Bu}$  (top spectrum) are attributed to formation of  $(^{\text{Mes}}\text{dmx})\text{H}_2$ , possibly from adventitious water.

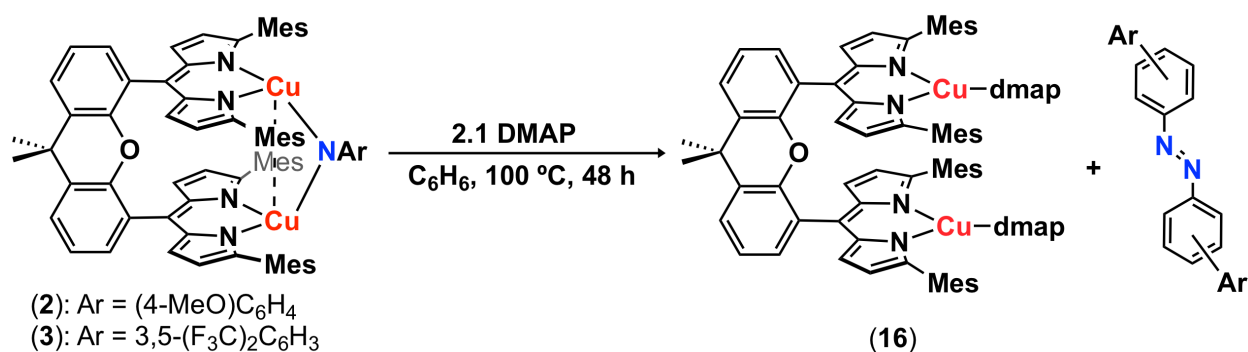

**Dimethylaminopyridine (DMAP) Reactivity from 3.** In the drybox, to a benzene solution of **3** (11.0 mg, 0.008 mmol, 1.0 equiv.) in a J-Young tube was added dimethylaminopyridine (DMAP; 2.1 mg, 0.017 mmol, 2.1 equiv.). The J-Young was sealed and heated to 100 °C for two days in which unreacted starting material, (Mes<sub>2</sub>dmx)Cu<sub>2</sub>(dmap)<sub>2</sub> (**16**), and 1,2-bis(3,5-bis(trifluoromethyl)phenyl)diazene (for **3**) were observed by <sup>1</sup>H NMR spectroscopy and <sup>19</sup>F NMR spectroscopy. Spectral data of the organic product is consistent with previously reported characterization data.<sup>12</sup> The analogous reactivity profile is observed for **2**.

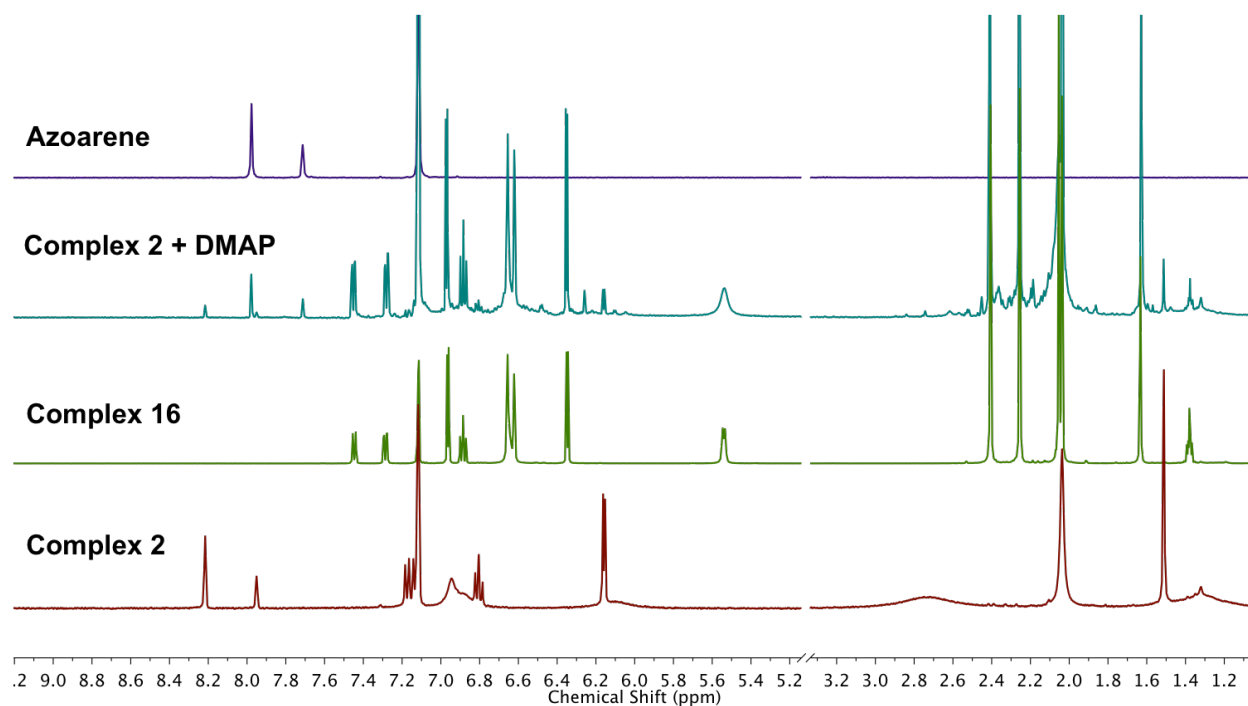

**Figure S-54.** Representative <sup>1</sup>H NMR spectra overlay of (Mes<sub>2</sub>dmx)Cu<sub>2</sub>(μ<sup>2</sup>-N(3,5-(F<sub>3</sub>C)<sub>2</sub>C<sub>6</sub>H<sub>3</sub>)) (**3**, red, bottom spectrum), (Mes<sub>2</sub>dmx)Cu<sub>2</sub>(dmap)<sub>2</sub> (**6**, green, lower middle), reaction of **3** with DMAP at 100 °C over two days (cyan, upper middle), and authentic azoarene product (purple, top).

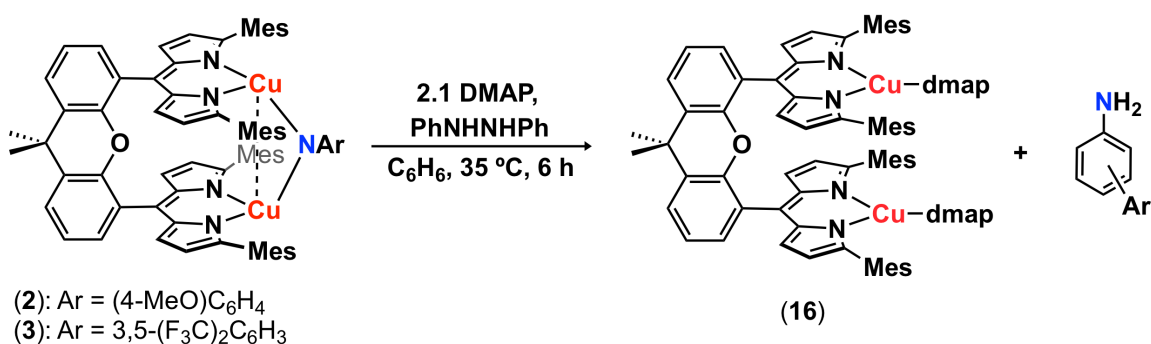

**Dimethylaminopyridine (DMAP) Reactivity from 3 in presence of weak C–H bonds.** In the drybox, to a benzene solution of **3** (9.3 mg, 0.007 mmol, 1.0 equiv.) in a J-Young tube was added dimethylaminopyridine (DMAP; 1.8 mg, 0.015 mmol, 2.1 equiv.) and 1,2-diphenylhydrazine (PhNHNHPh; 1.5 mg, 0.008 mmol, 1.1 equiv.). The J-Young was sealed and heated to 35 °C for six hours in which (<sup>Mes</sup>dmx)Cu<sub>2</sub>(dmap)<sub>2</sub> (**16**) and 3,5-bis(trifluoromethyl)aniline were observed by <sup>1</sup>H NMR spectroscopy and <sup>19</sup>F NMR spectroscopy, accompanied by full consumption of starting material. Spectral data of 3,5-bis(trifluoromethyl)aniline is consistent with authentic commercial samples. The analogous reactivity profile is observed for **2**.

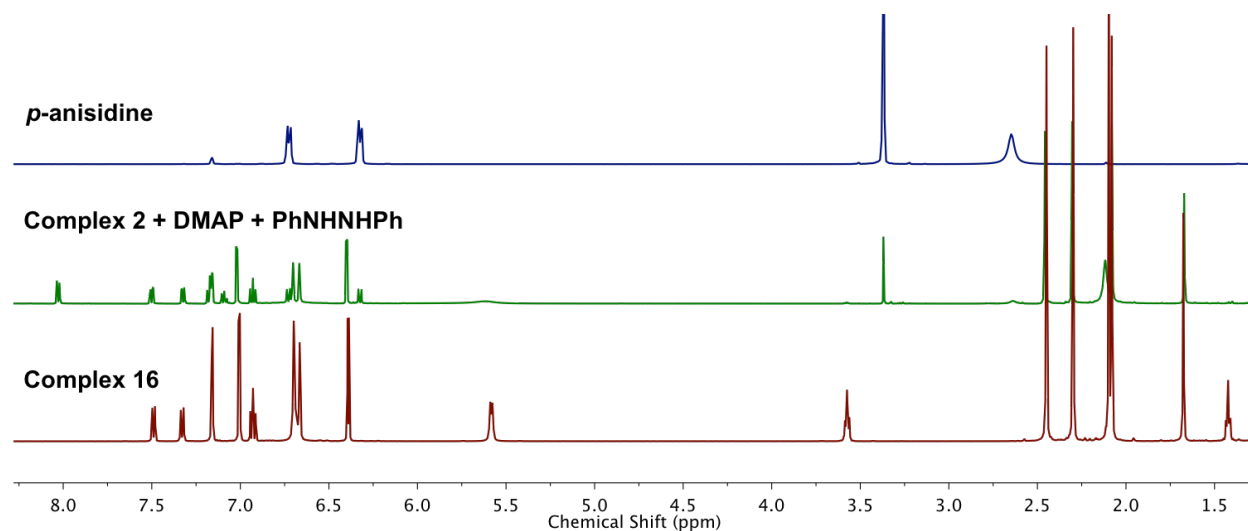

**Figure S-55.** Representative <sup>1</sup>H NMR spectra overlay of (<sup>Mes</sup>dmx)Cu<sub>2</sub>(dmap)<sub>2</sub> (**6**, red, bottom spectrum), (<sup>Mes</sup>dmx)Cu<sub>2</sub>(μ<sup>2</sup>-N(C<sub>6</sub>H<sub>3</sub>OMe)) (**2**) treated with dimethylaminopyridine (DMAP), and 1,2-diphenylhydrazine (PhNHNHPh) at 60 °C overnight (green, middle), and p-anisidine (blue, top).



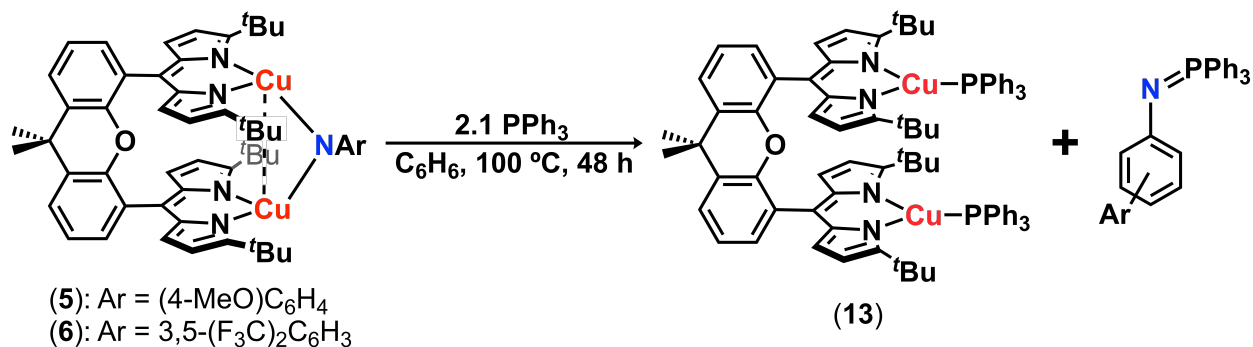

**Triphenylphosphine (PPh<sub>3</sub>) Reactivity from 5 and 6.** In the drybox, to a benzene solution of either **5** (10.0 mg, 0.008 mmol, 1.0 equiv.) or **6** (9.2 mg, 0.008 mmol, 1.0 equiv.) in a J. Young tube was added triphenylphosphine (6.9 mg, 0.080 mmol, 10 equiv.). The J. Young tube was sealed and heated to 100 °C for two days in which the corresponding iminophosphine and partial conversion to **13** were confirmed by <sup>1</sup>H, <sup>31</sup>P, and <sup>19</sup>F NMR comparison to authentic samples. Complexes N-(4-methoxyphenyl)-1,1,1-triphenyl-λ<sup>5</sup>-phosphanimine Ph<sub>3</sub>P(N(C<sub>6</sub>H<sub>4</sub>OMe)) and N-(3,5-bis(trifluoromethyl)phenyl)-1,1,1-triphenyl-λ<sup>5</sup>-phosphanimine Ph<sub>3</sub>P(N(3,5-(CF<sub>3</sub>)<sub>2</sub>C<sub>6</sub>H<sub>3</sub>)) were independently prepared according to literature procedures.<sup>3,19</sup>

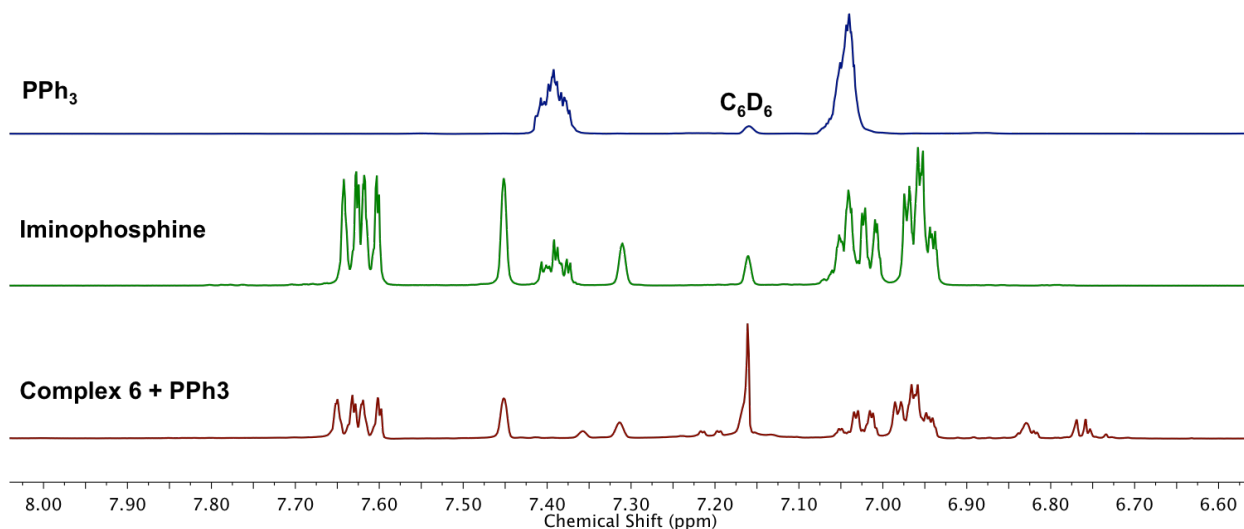

**Figure S-56.** Representative <sup>1</sup>H NMR spectra overlay of treatment of (<sup>t</sup>Budmx)Cu<sub>2</sub>(μ<sup>2</sup>-N(3,5-(F<sub>3</sub>C)<sub>2</sub>C<sub>6</sub>H<sub>3</sub>)) (**6**) with triphenylphosphine (*red*, bottom spectrum), iminophosphine prepared by treatment of aryl azide with triphenylphosphine (*green*, middle spectrum), and triphenylphosphine (*blue*, top).

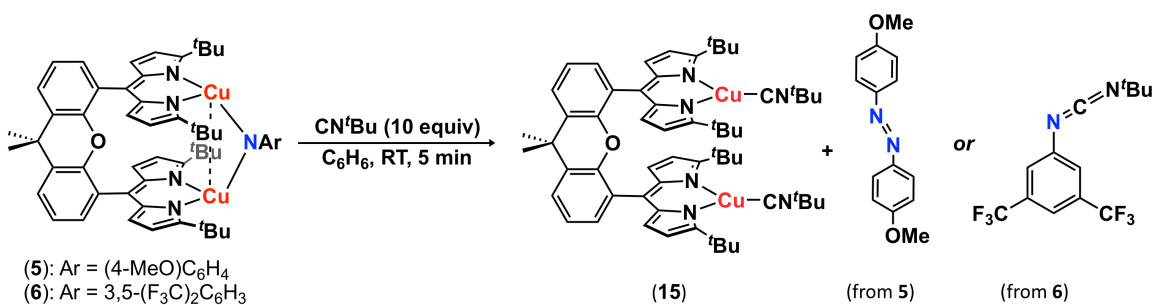

***Tert*-butyl Isocyanide (CN<sup>t</sup>Bu) Reactivity from 5 and 6.** In the drybox, to a benzene solution of either **5** (10.0 mg, 0.008 mmol) or **6** (9.2 mg, 0.008 mmol) in a J-Young tube was added neat *tert*-butyl isocyanide (6.9 mg, 0.080 mmol, 10 equiv.). A stark color change from purple to orange was observed upon inversion of the J-Young tube. <sup>1</sup>H-NMR spectroscopy revealed complete consumption of the starting material and conversion to **4**, accompanied by formation of either 1,2-bis(4-methoxyphenyl)diazene (from **5**) or *N*-(3,5-bis(trifluoromethyl)phenyl)-*N*-(*tert*-butyl)methanediimine (from **6**). Spectral data of both organic products are consistent with previously reported characterization data.

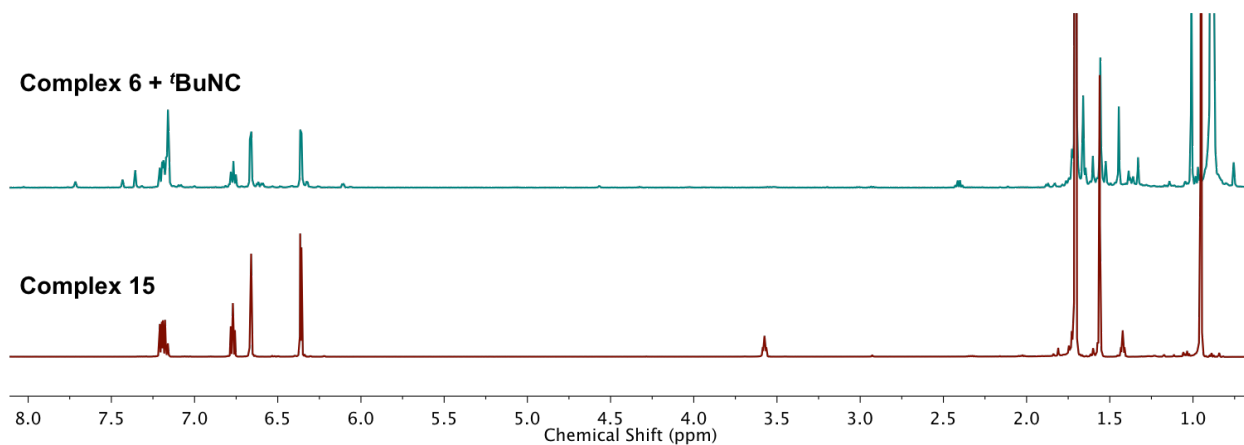

**Figure S-57.** Representative <sup>1</sup>H NMR spectra overlay of (<sup>t</sup>Bu<sub>3</sub>dmx)Cu<sub>2</sub>(CN<sup>t</sup>Bu)<sub>2</sub> (**15**) (red, bottom spectrum) and (<sup>t</sup>Bu<sub>3</sub>dmx)Cu<sub>2</sub>(μ<sup>2</sup>-N(3,5-(CF<sub>3</sub>)<sub>2</sub>C<sub>6</sub>H<sub>3</sub>)) (**6**) upon addition of *tert*-butyl isocyanide (cyan, top spectrum).

## Further Spectroscopic Characterization.

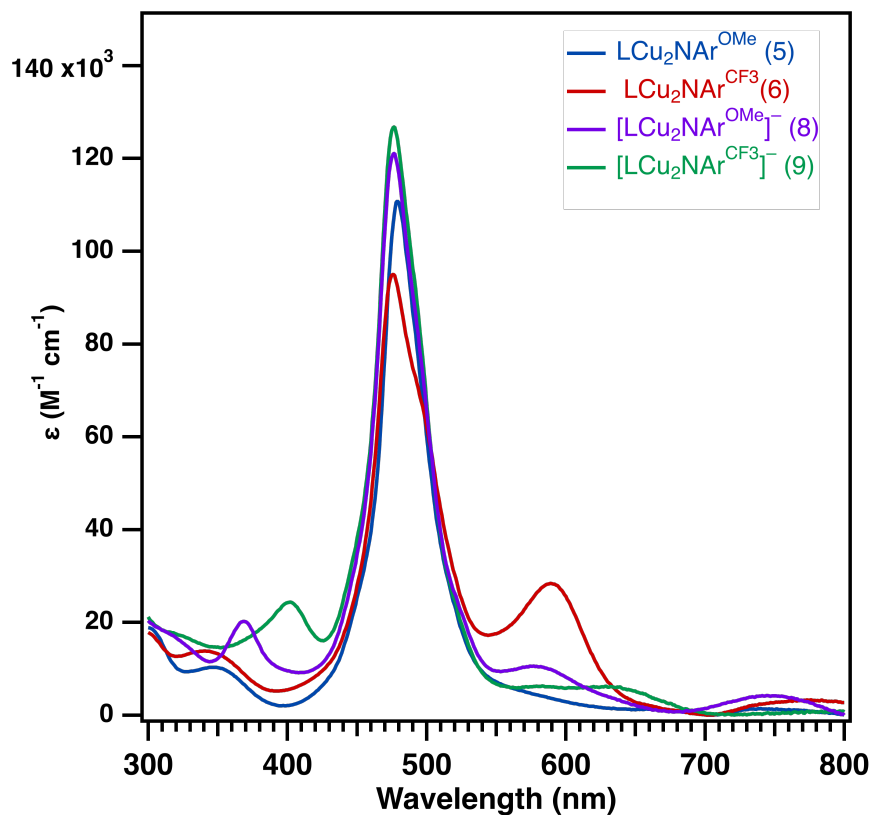

**Figure S-58.** Superimposed UV-Vis spectra of  $(^t\text{Bu}^{\text{dmx}})\text{Cu}_2(\mu^2\text{-N}(\text{C}_6\text{H}_4\text{OMe}))$  (5),  $(^t\text{Bu}^{\text{dmx}})\text{Cu}_2(\mu^2\text{-N}(3,5\text{-}(\text{F}_3\text{C})_2\text{C}_6\text{H}_3))$  (6),  $[\text{K}(\text{C}_{222})][(^t\text{Bu}^{\text{dmx}})\text{Cu}_2(\mu^2\text{-N}(\text{C}_6\text{H}_4\text{OMe}))]$  (8), and  $[\text{K}(\text{C}_{222})][(^t\text{Bu}^{\text{dmx}})\text{Cu}_2(\mu^2\text{-N}(3,5\text{-}(\text{F}_3\text{C})_2\text{C}_6\text{H}_3))]$  (9).

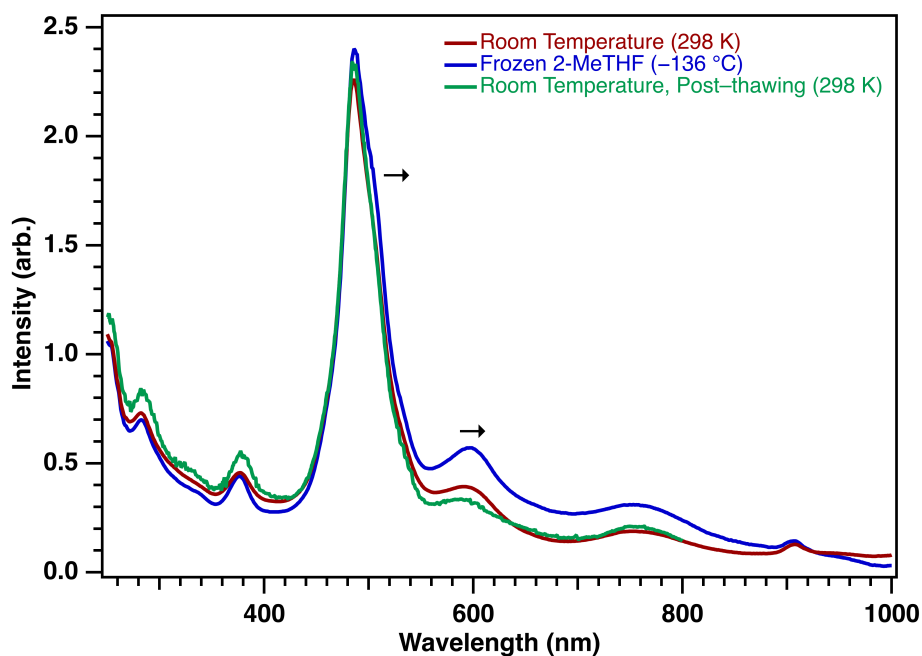

**Figure S-59.** Superimposed UV-Vis spectra of  $[\text{K}(\text{C}_{222})][(\text{}^t\text{Bu})\text{dmx}]\text{Cu}_2(\text{N}(\text{C}_6\text{H}_4\text{OMe}))$  (**8**) in 2-methyltetrahydrofuran solution at room temperature (*maroon*), as a frozen glass (*blue*), and upon re-equilibration in with room temperature (*green*). Insignificant shifts, denoted by arrows, are likely due to changes in accessible vibrational modes and not due to fundamentally distinct electronic structure upon cooling. Identical features for both room temperature measurements suggests against sample decomposition at low temperature.

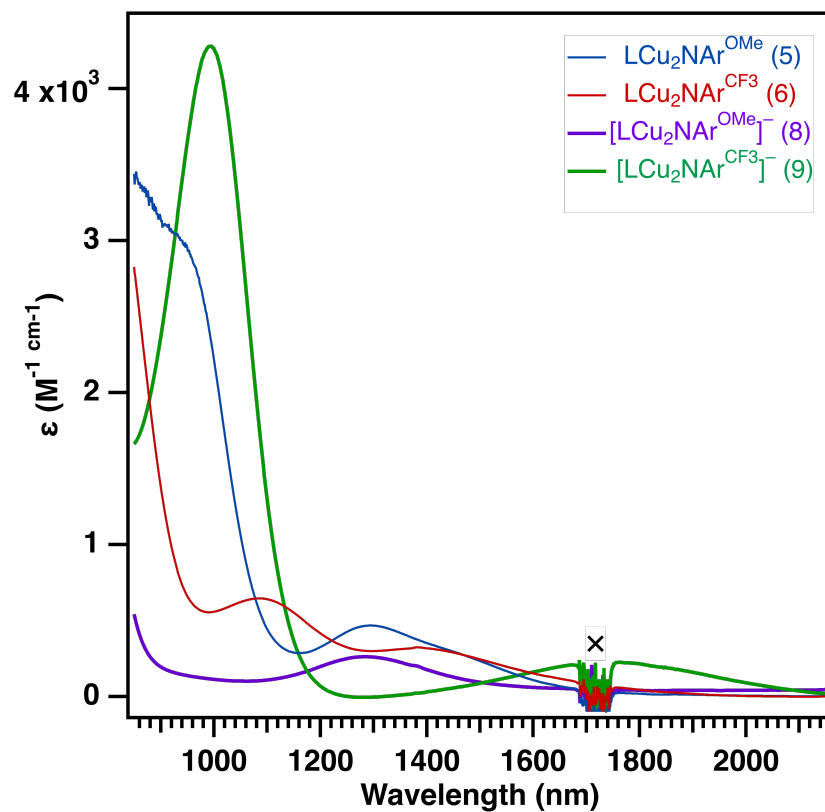

**Figure S-60.** Superimposed equimolar near-infrared spectra of  $(^t\text{Bu}\text{dmx})\text{Cu}_2(\mu^2\text{-N}(\text{C}_6\text{H}_4\text{OMe}))$  (**5**),  $(^t\text{Bu}\text{dmx})\text{Cu}_2(\mu^2\text{-N}(3,5\text{-}(\text{F}_3\text{C})_2\text{C}_6\text{H}_3))$  (**6**),  $[\text{K}(\text{C}_{222})][(^t\text{Bu}\text{dmx})\text{Cu}_2(\text{N}(4\text{-MeOC}_6\text{H}_4))]$  (**8**), and  $[\text{K}(\text{C}_{222})][(^t\text{Bu}\text{dmx})\text{Cu}_2(\mu^2\text{-N}(3,5\text{-}(\text{F}_3\text{C})_2\text{C}_6\text{H}_3))]$  (**9**). Feature at *ca.* 1700 nm (**x**) is consequent of solvent (tetrahydrofuran) overtones.

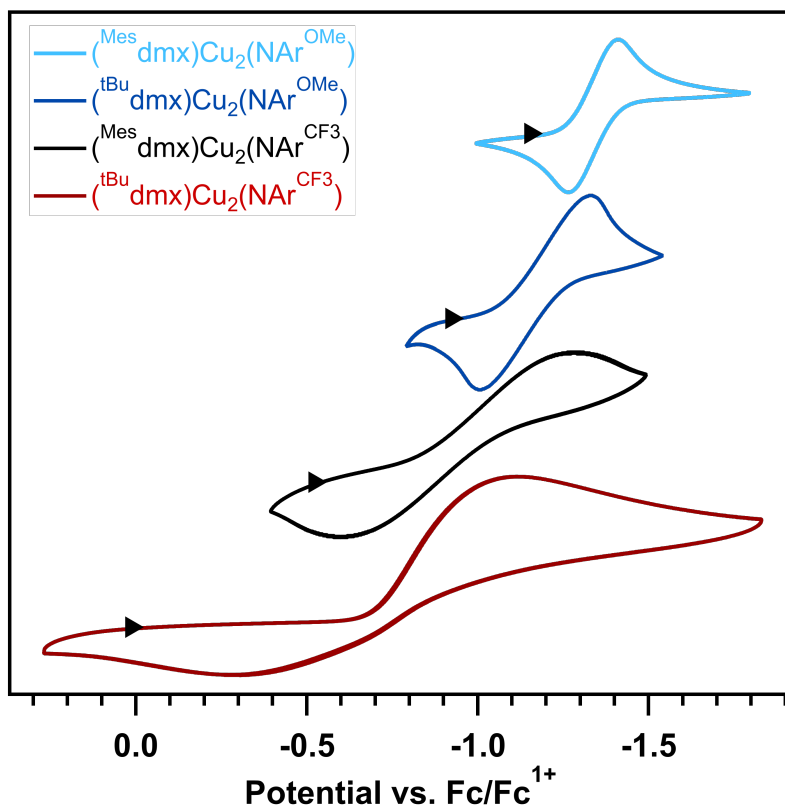

**Figure S–61.** Stacked cyclic voltammograms (CV) of (<sup>Mes</sup>dmx)Cu<sub>2</sub>(μ<sup>2</sup>-N(C<sub>6</sub>H<sub>4</sub>OMe)) (**2**, *light blue*), (<sup>tBu</sup>dmx)Cu<sub>2</sub>(μ<sup>2</sup>-N(C<sub>6</sub>H<sub>4</sub>OMe)) (**8**, *dark blue*), (<sup>Mes</sup>dmx)Cu<sub>2</sub>(μ<sup>2</sup>-N(3,5-(CF<sub>3</sub>)<sub>2</sub>C<sub>6</sub>H<sub>3</sub>)) (**3**, *black*), and (<sup>tBu</sup>dmx)Cu<sub>2</sub>(N(3,5-(CF<sub>3</sub>)<sub>2</sub>C<sub>6</sub>H<sub>3</sub>)) (**9**, *maroon*) at a scan rate of 50 mV s<sup>-1</sup>. The data was recorded in tetrahydrofuran at a concentration of *ca.* 2 mM, with glassy carbon, Pt-wire, and Ag-wire as the working, counter, and reference electrodes, respectively. Saturated tetrabutylammonium hexafluorophosphate (TBAPF<sub>6</sub>) solutions of 0.2 M in tetrahydrofuran were prepared before each experiment.

## X-ray Absorption Spectroscopy (XAS) and TDDFT Plots

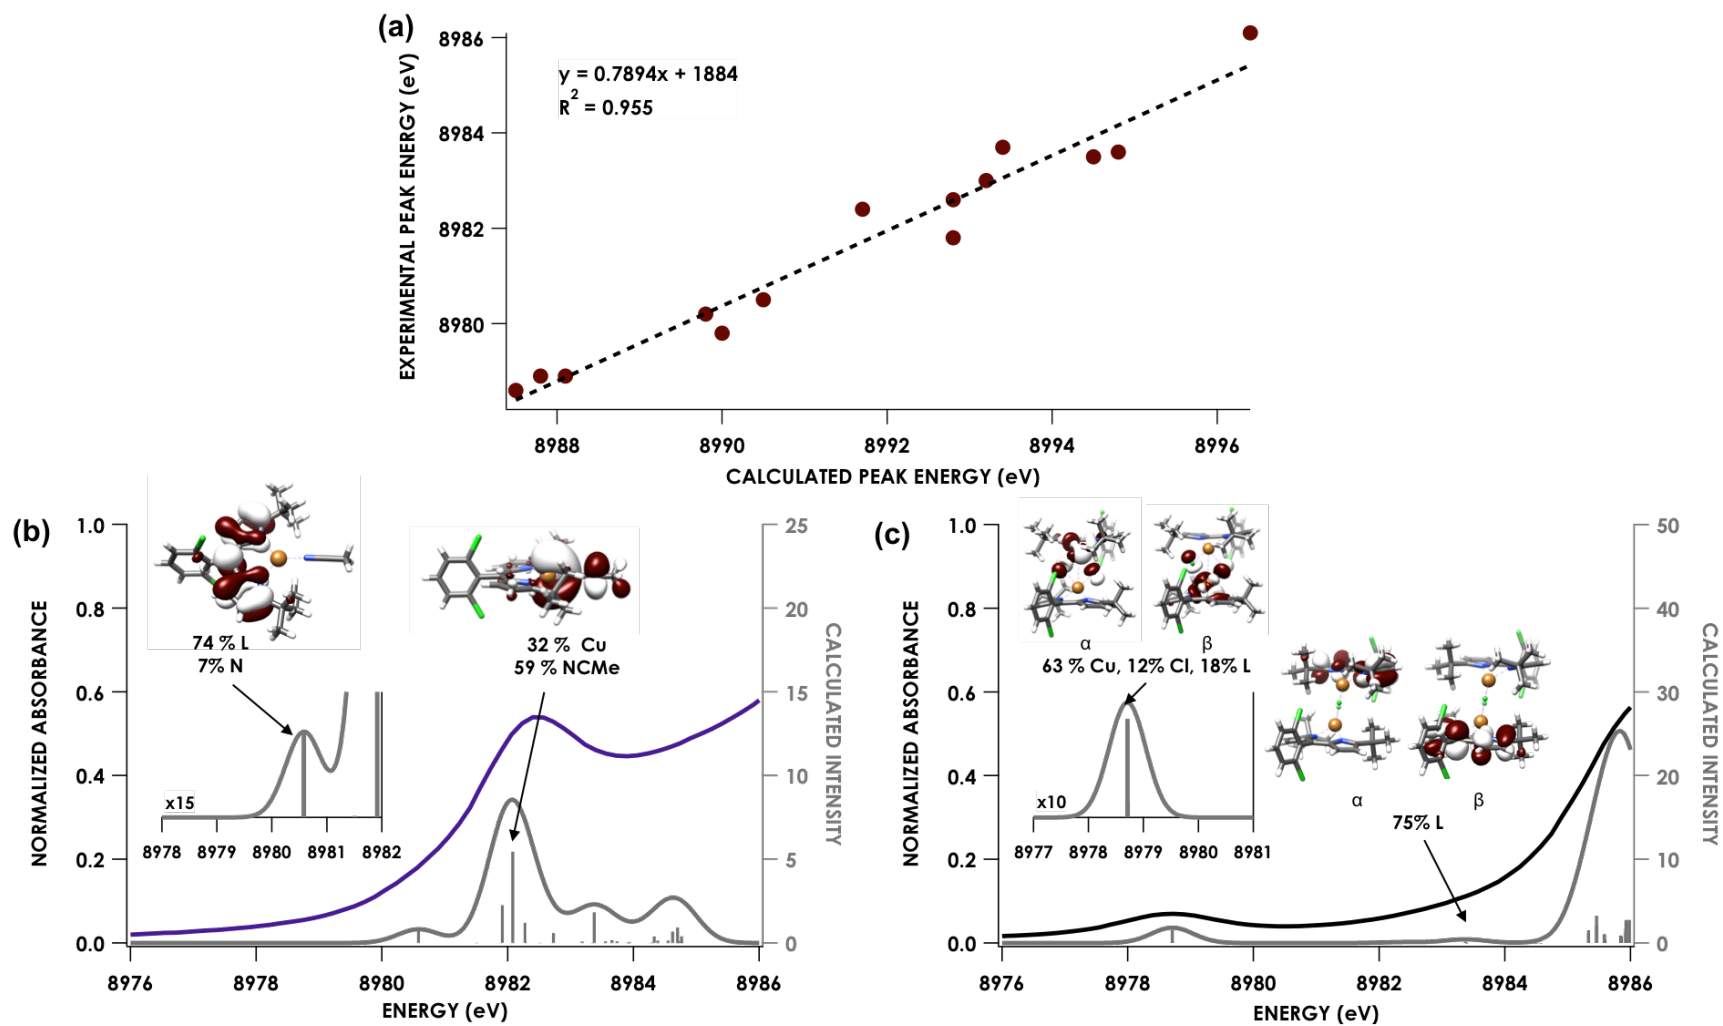

**Figure S-62.** (a) Correlation of experimental vs. TDDFT-calculated Cu K-edge XAS pre-edge peak energies, and comparison of experimental to calculated spectra (shifted according to correlation) of (b)  $(t\text{BuL})\text{Cu}^{\text{I}}(\text{NCMe})$  (**10**) and (c)  $[(t\text{BuL})\text{Cu}^{\text{II}}\text{Cl}]_2$  (**11**).

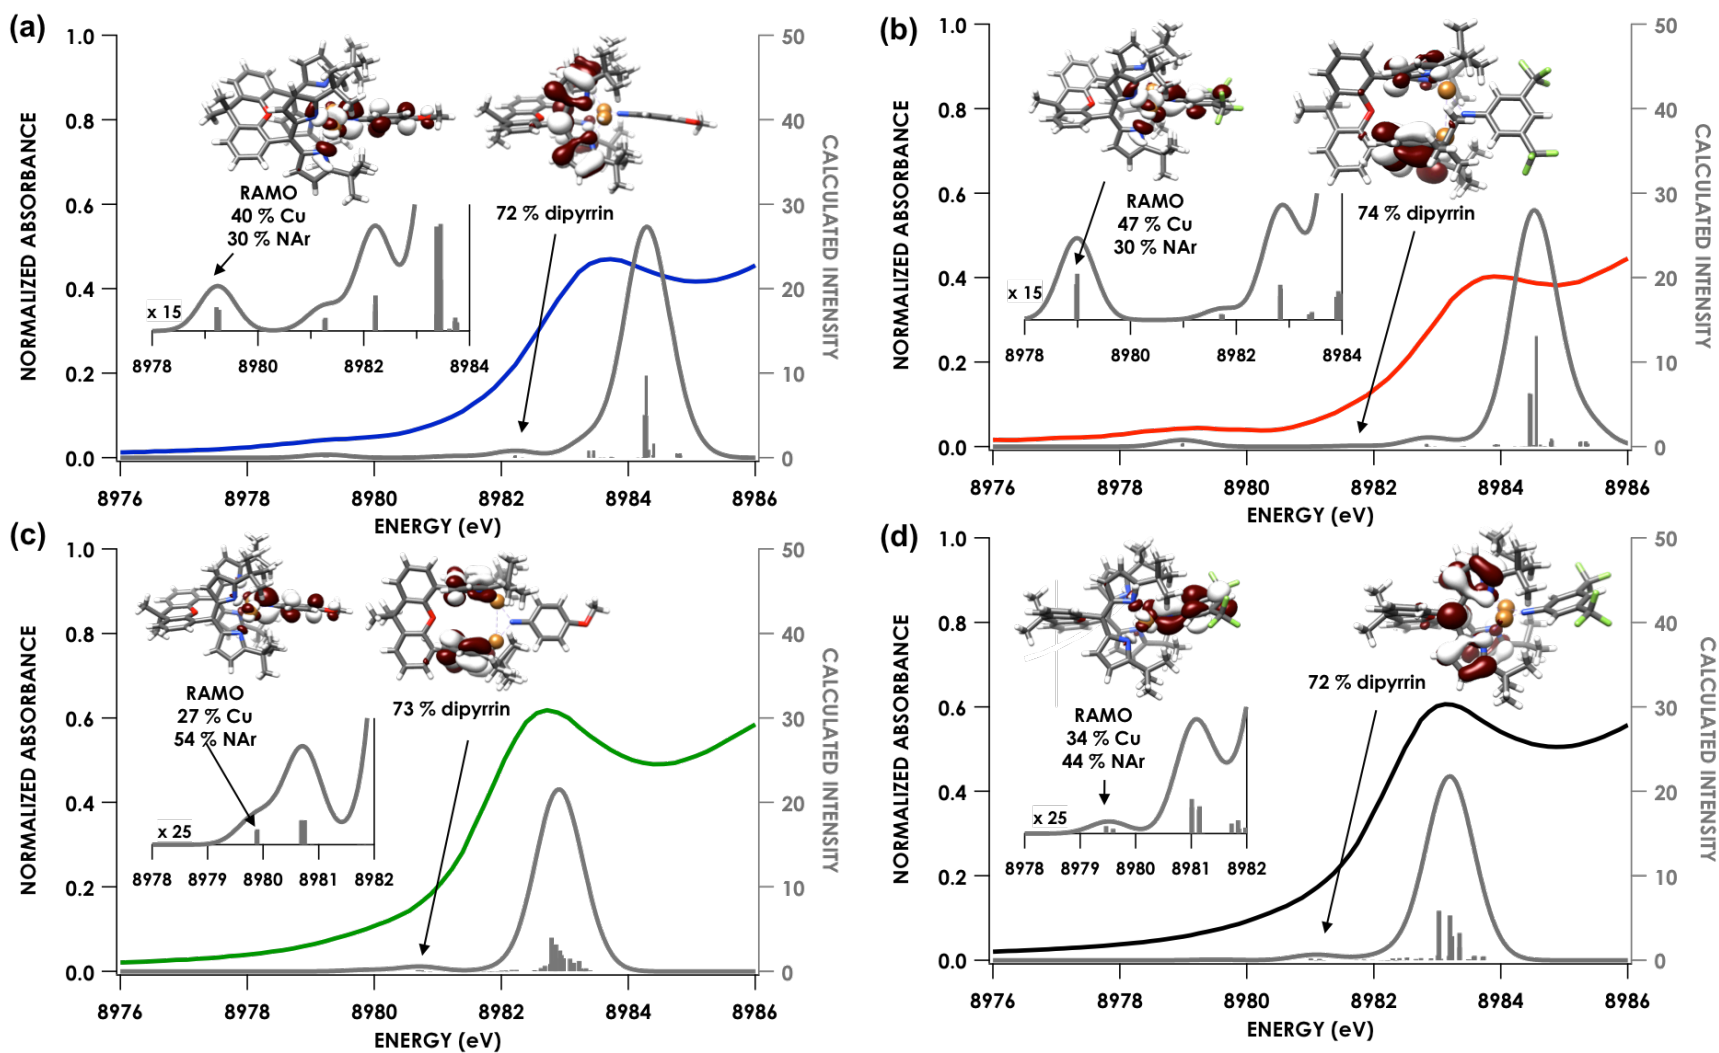

**Figure S-63.** Comparison of experimental Cu K-edge to calculated spectra (shifted according to correlation from Figure S-62) of (a)  $(t\text{Bu}dmx)\text{Cu}_2(\mu^2\text{-N}(\text{C}_6\text{H}_4\text{OMe}))$  (**5**), (b)  $(t\text{Bu}dmx)\text{Cu}_2(\mu^2\text{-N}(3,5\text{-}(\text{CF}_3)_2\text{C}_6\text{H}_3))$  (**6**), (c)  $[(t\text{Bu}dmx)\text{Cu}_2(\mu^2\text{-N}(\text{C}_6\text{H}_4\text{OMe}))]^-$  (**8**), and (d)  $[(t\text{Bu}dmx)\text{Cu}_2(\mu^2\text{-N}(3,5\text{-}(\text{CF}_3)_2\text{C}_6\text{H}_3))]^-$  (**9**).



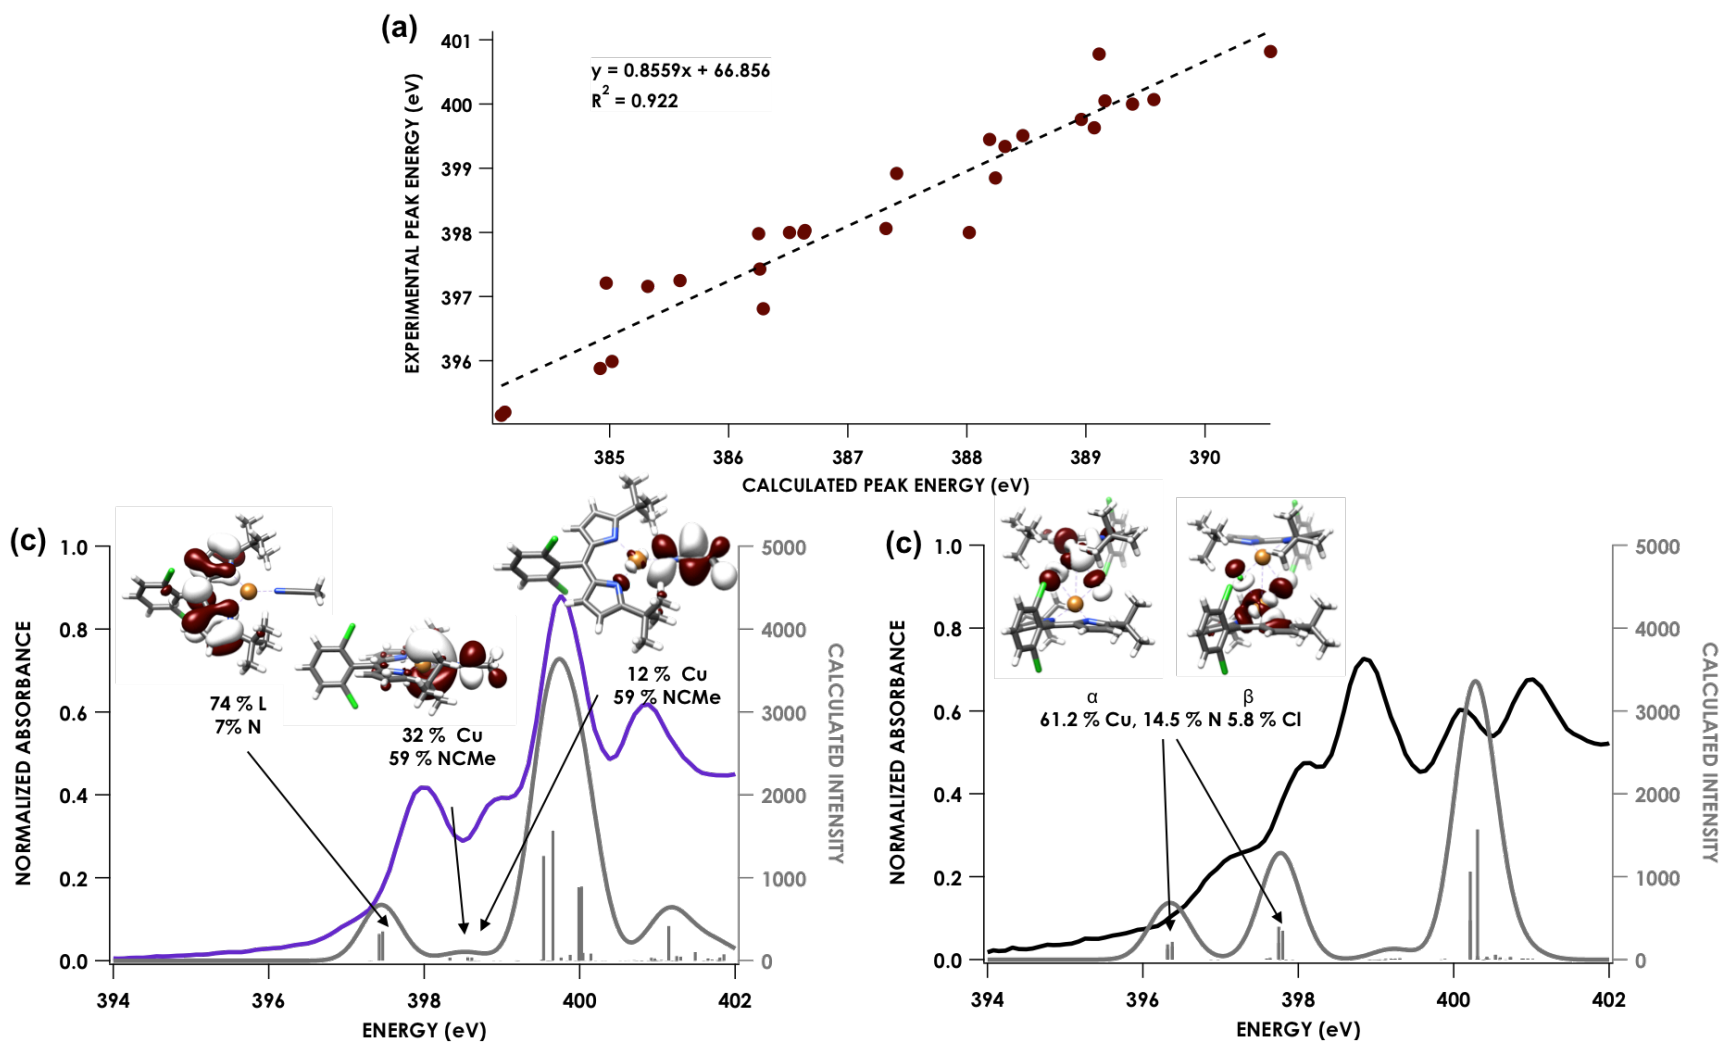

**Figure S-64.** (a) Correlation of experimental vs. TDDFT-calculated Cu N-edge XAS pre-edge peak energies, and (b) comparison of experimental to calculated spectra (shifted according to correlation) of (b)  $(t^{\text{Bu}}\text{L})\text{Cu}^{\text{I}}(\text{NCMe})$  (**10**) and (c)  $[(t^{\text{Bu}}\text{L})\text{Cu}^{\text{II}}\text{Cl}]_2$  (**11**).

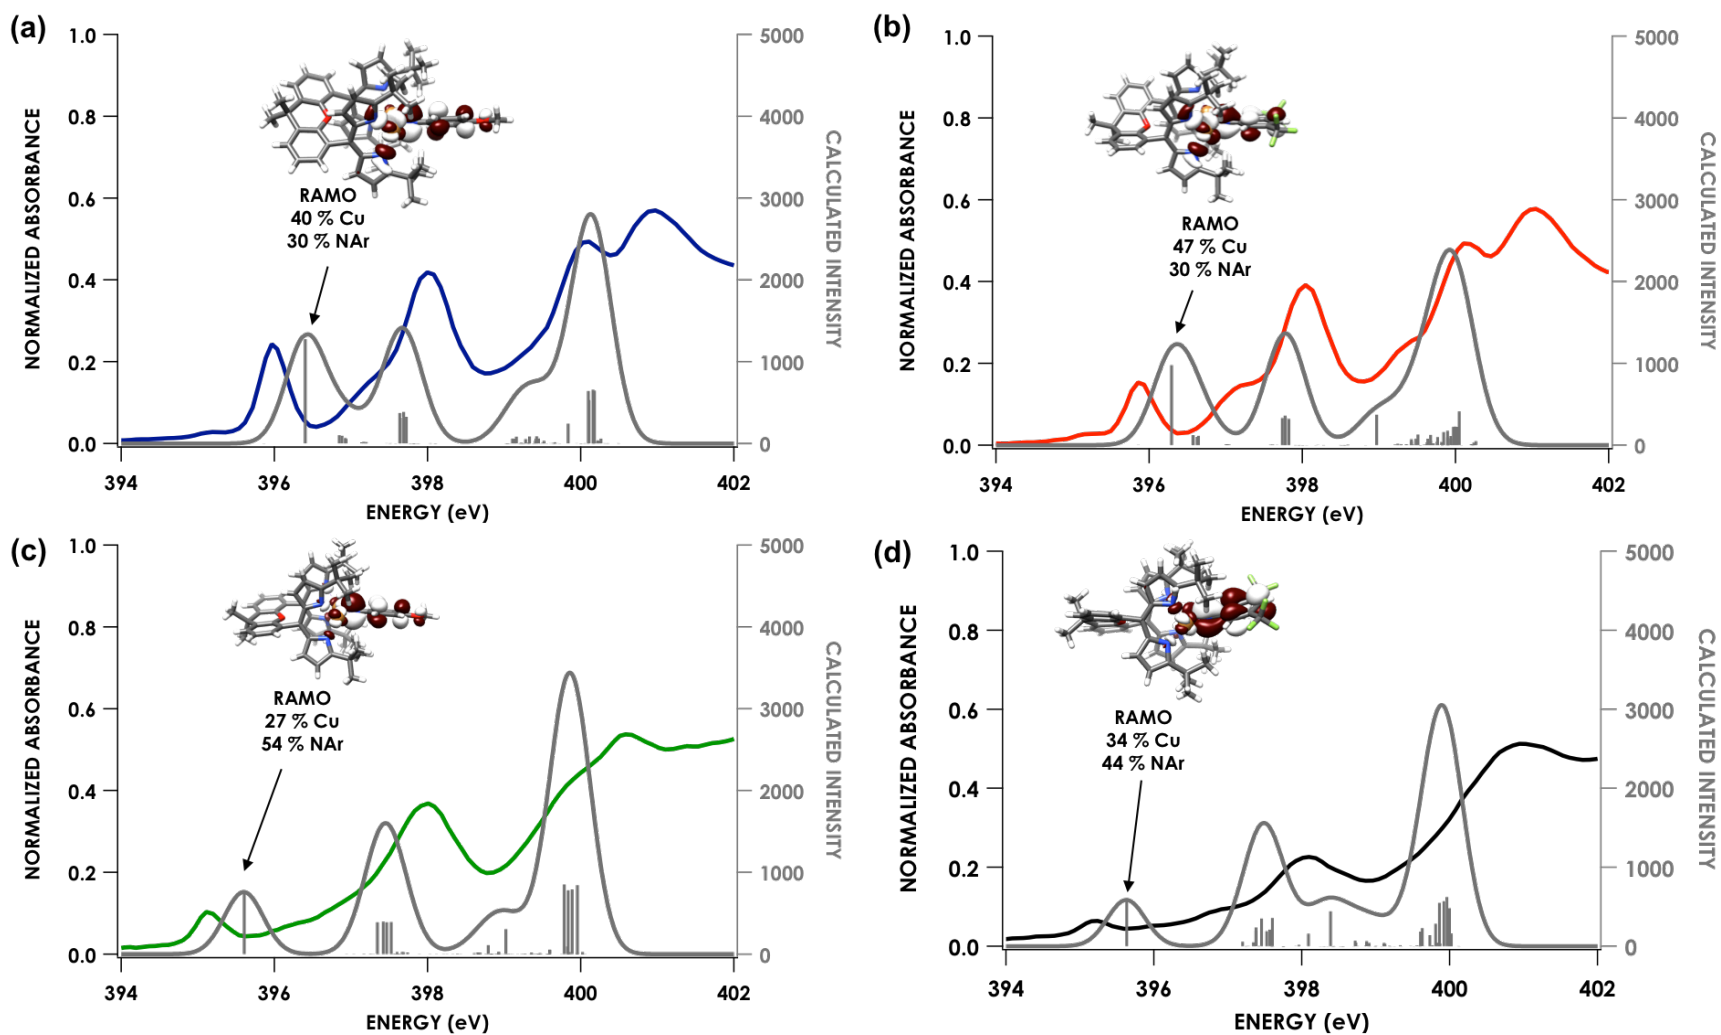

**Figure S-65.** Comparison of experimental N K-edge to calculated spectra (shifted according to correlation from Figure S-64 of (a)  ${}^t\text{Bu}\text{dmx}\text{Cu}_2(\mu^2\text{-N}(\text{C}_6\text{H}_4\text{OMe}))$  (**5**), (b)  ${}^t\text{Bu}\text{dmx}\text{Cu}_2(\text{N}(3,5\text{-}(\text{CF}_3)_2\text{C}_6\text{H}_3))$  (**6**), (c)  $[({}^t\text{Bu}\text{dmx}\text{Cu}_2(\mu^2\text{-N}(\text{C}_6\text{H}_4\text{OMe})))]^-$  (**8**), and (d)  $[({}^t\text{Bu}\text{dmx}\text{Cu}_2(\text{N}(3,5\text{-}(\text{CF}_3)_2\text{C}_6\text{H}_3)))]^-$  (**9**).

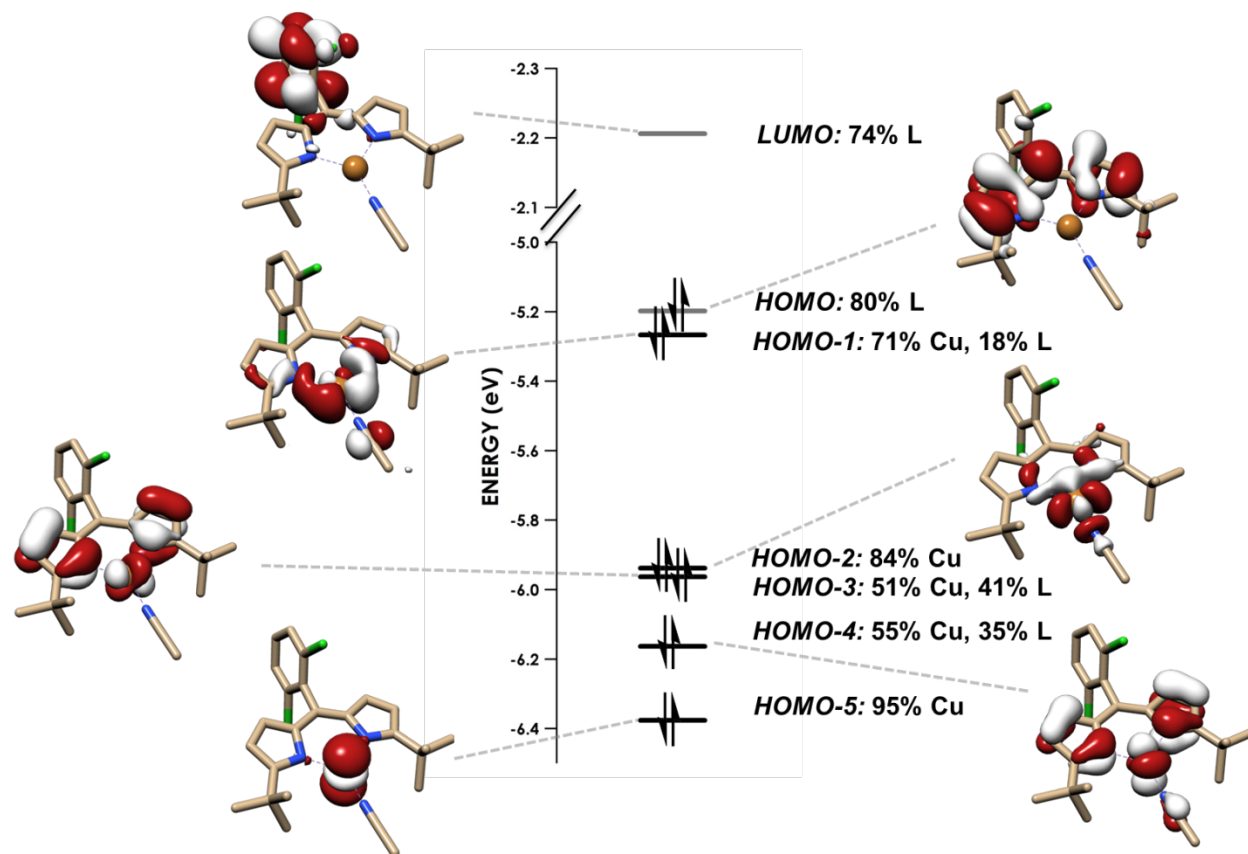

**Figure S-66.** Frontier MO diagrams of  $(t\text{BuL})\text{Cu}^{\text{I}}\text{NCMe}$  (**10**) showing Cu-localized orbitals in black and the ligand-localized MOs in grey, plotted at an isolevel of 0.03 au. Orbitals shown are the  $\beta$  UKS MOs calculated at the B3LYP/def2-TZVP(-f)-ZORA level of theory.

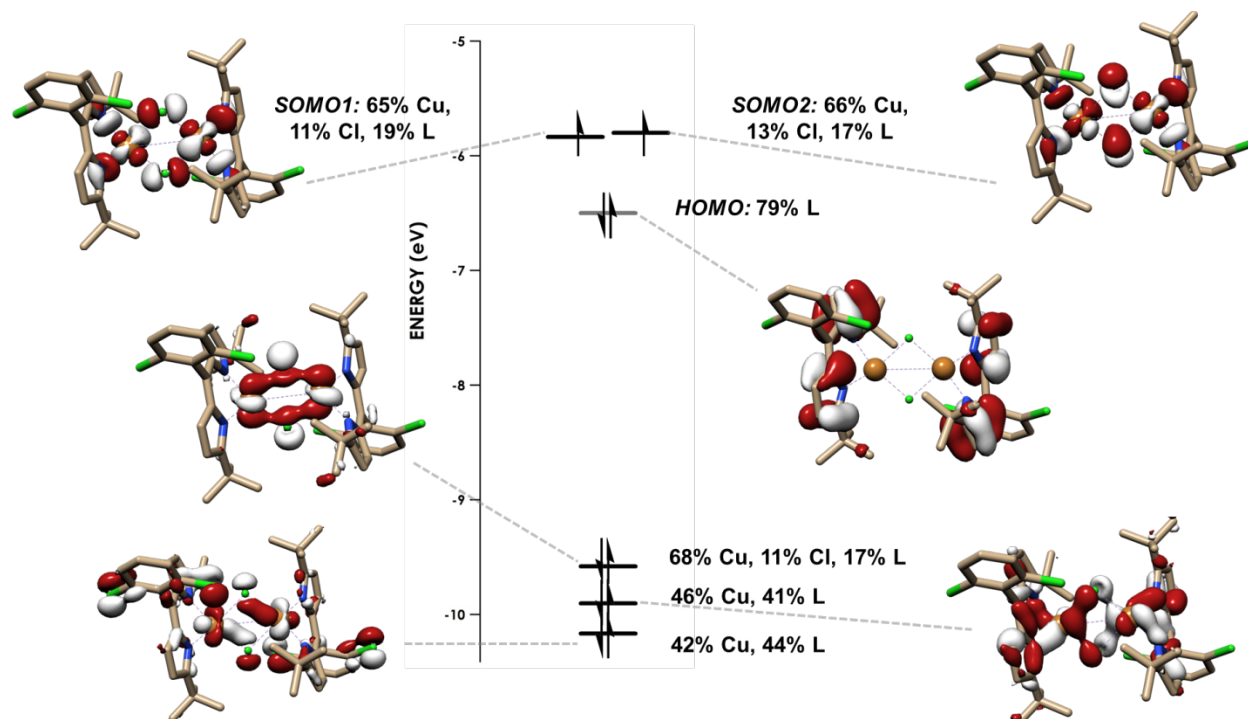

**Figure S-67.** Frontier MO diagrams of  $[(t\text{BuL})\text{Cu}^{\text{II}}\text{Cl}]_2$  (**11**) showing Cu-localized orbitals in black and the ligand-localized MOs in grey, plotted at an isolevel of 0.03 au. Orbitals shown are the  $\beta$  UKS MOs calculated at the B3LYP/def2-TZVP(-f)-ZORA level of theory.

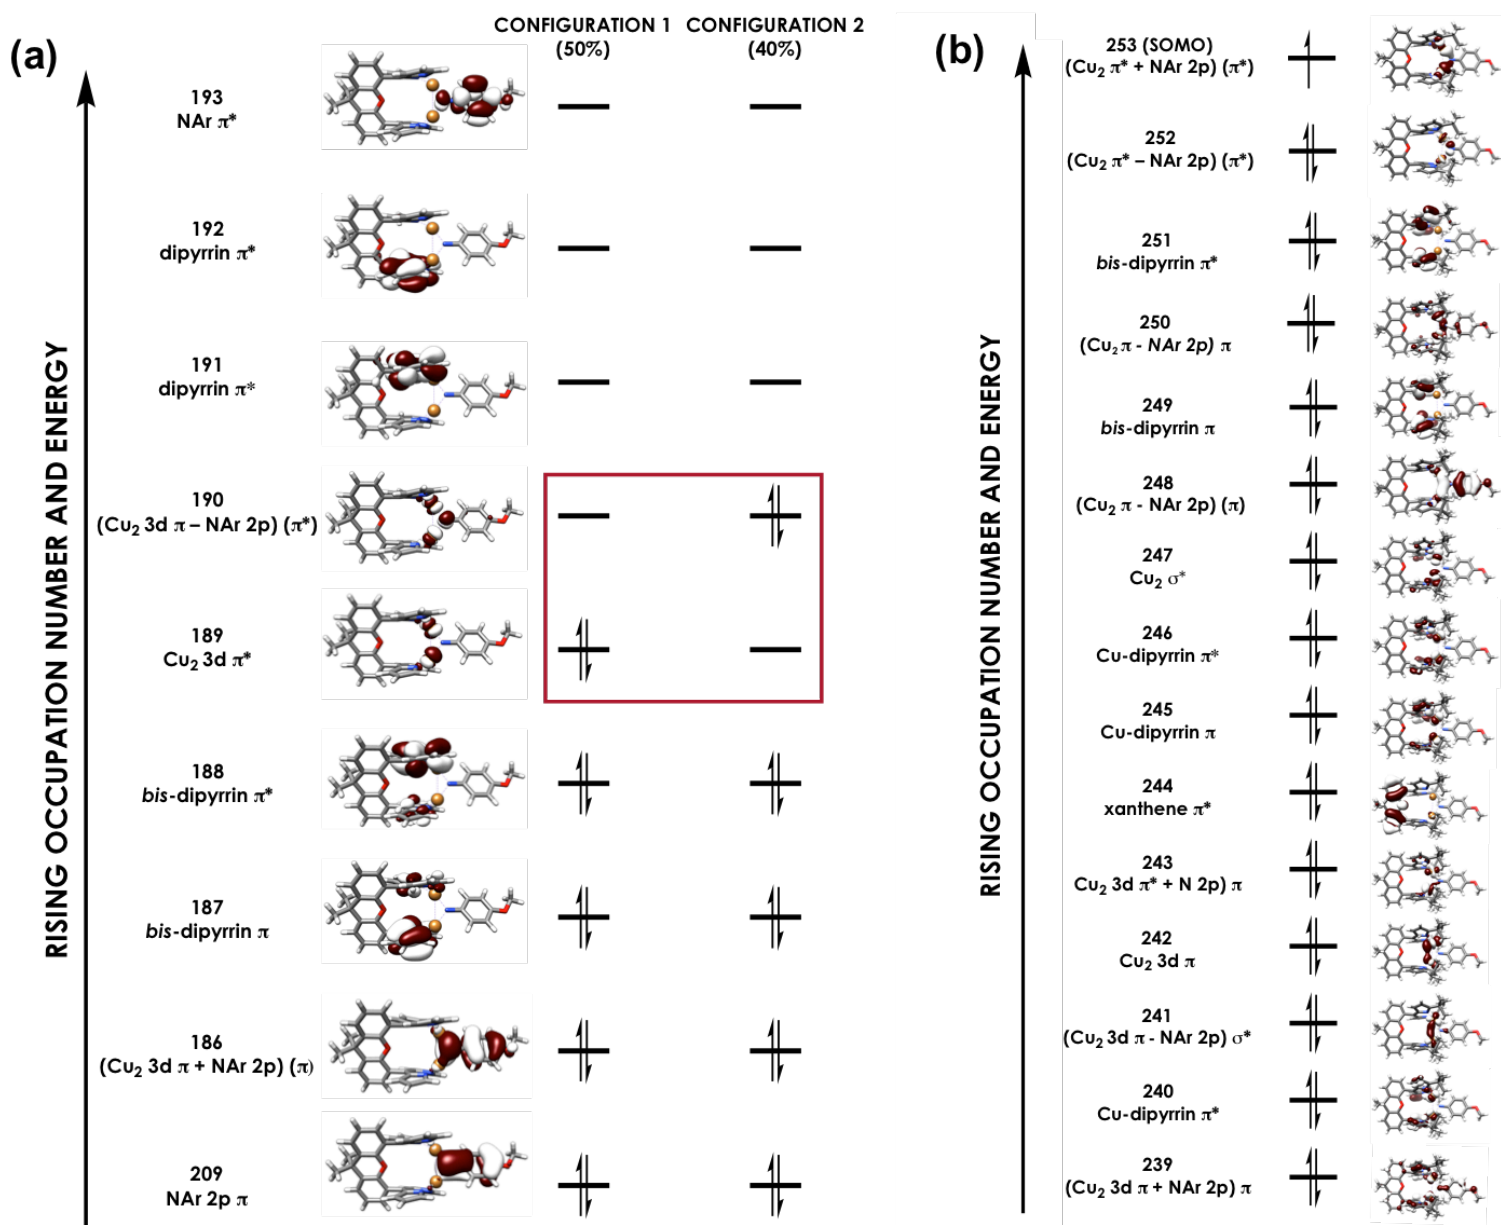

**Figure S-68.** Qualitative frontier molecular orbital diagrams of  $[(^{t\text{Bu}}\text{dmx})\text{Cu}_2(\mu^2\text{-N}(\text{C}_6\text{H}_4\text{OMe}))]^n$  ( $n = 0$ , **5**) (a-c) and ( $n = -1$ , **8**) (d). Diagram (a) depicts the two leading configurations making up the singlet ground state resulting from a CAS(10,9) calculation using the truncated model **5'**. These calculations employed the ZORA-def2-TZVP(-f) basis set on Cu and N with the ZORA-def2-SVP basis set on all other atoms. Occupation of MOs 213 and 214 differentiate the two configurations; these orbitals are printed beneath the diagram. Diagram (b) depicts the single configuration defining the doublet ground state of **8**. The MOs comprise QROs generated produced following an unrestricted B3LYP calculation employing the CP(PPP) basis set on Cu and def2-TZVP(-f) on all other atoms. Orbital plots are depicted at an isovalue of 0.03 au. All orbital labels are based on dominant interaction(s).

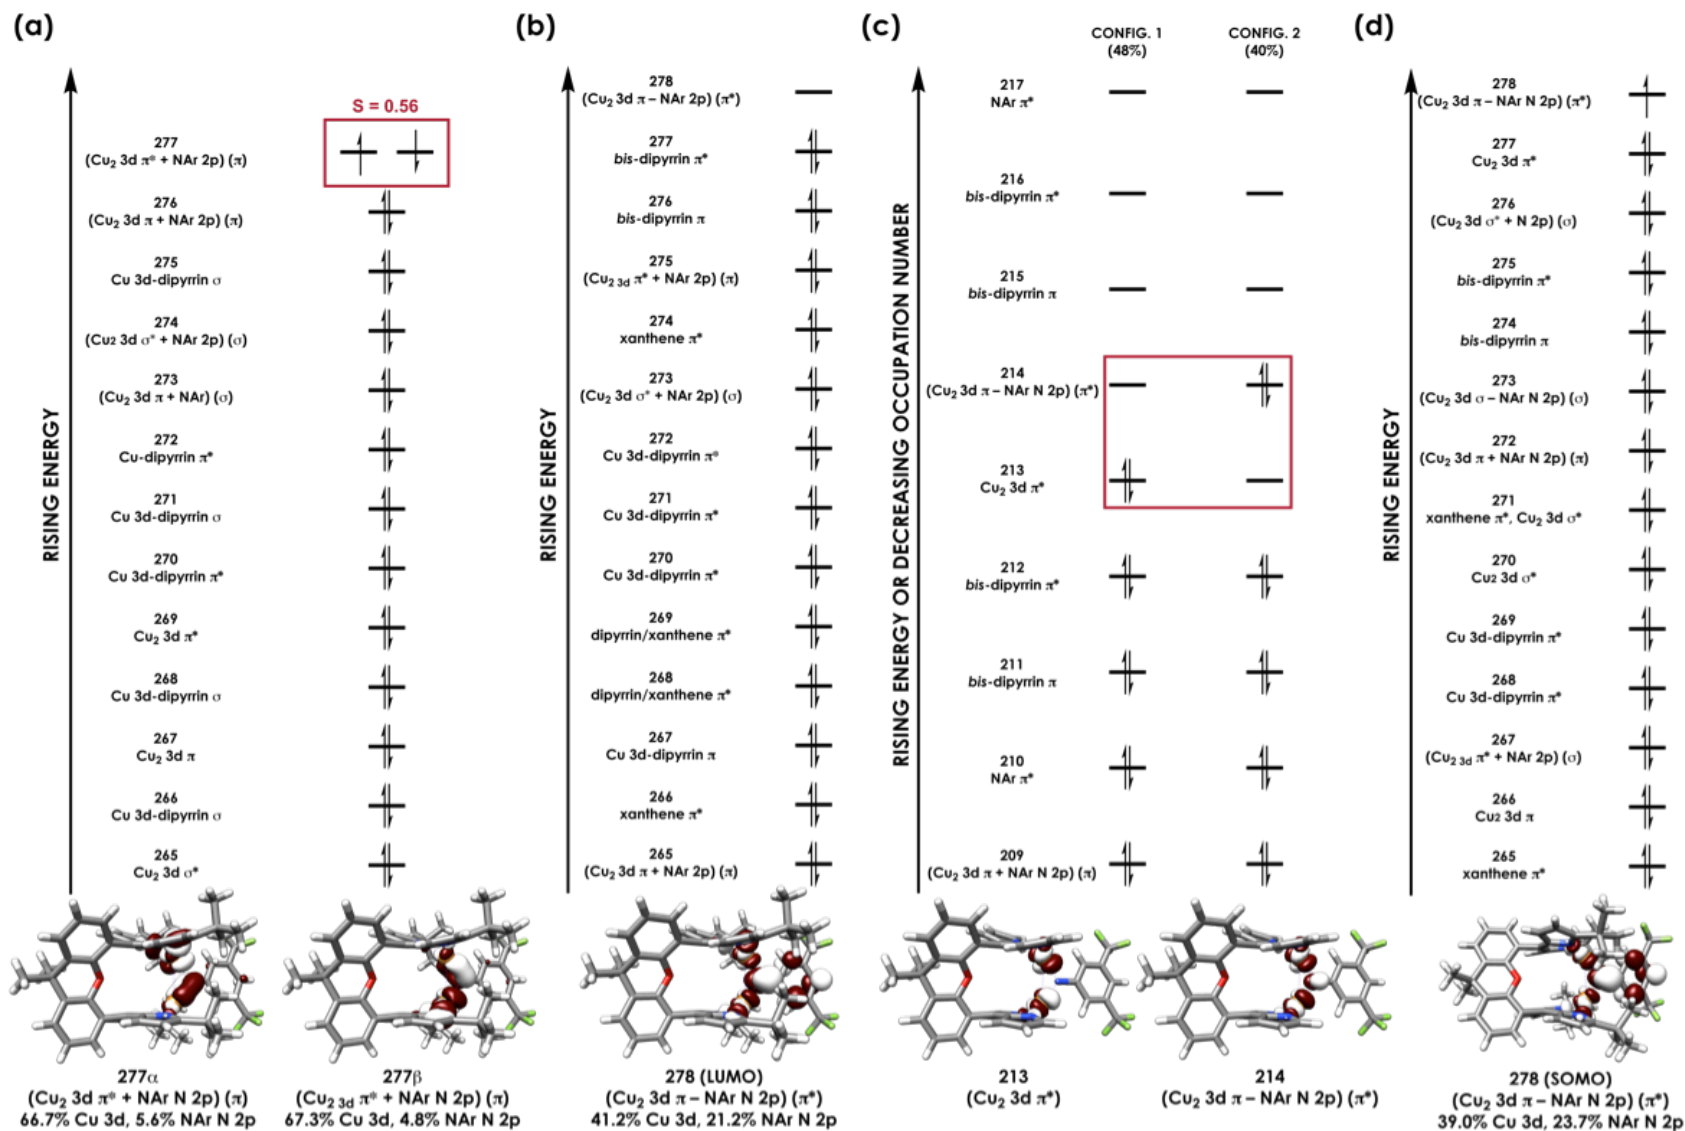

**Figure S–69.** Qualitative frontier molecular orbital diagrams of [ $(t^{\text{Bu}}\text{dmx})\text{Cu}_2(\mu^2\text{-N}(3,5\text{-}(\text{F}_3\text{C})_2\text{C}_6\text{H}_3))\text{]}^n$  ( $n = 0$ , **6**) (a-c) and ( $n = -1$ , **9**) (d). Diagram (a) shows unrestricted corresponding orbitals (UCOs) resulting from a broken symmetry [BS(1,1)] calculation carried out using the B3LYP hybrid density functional, the CP(PPP) basis on Cu, and the ZORA-def2-TZVP(-f) basis set on all other atoms. MOs  $277\alpha$  and  $277\beta$  are highlighted and plotted beneath, indicating antiferromagnetic coupling between electrons in spinorbitals involved in Cu–NAr  $\pi$  bonding. Diagram (b) depicts the frontier canonical orbitals following quasi-restricted orbital (QRO) transformation. This electronic structure allows from a Cu and N-based acceptor MO necessitated by the XAS observations; this orbital (278) is depicted beneath the diagram. Diagram (c) depicts the two leading configurations making up the singlet ground state resulting from a CAS(10,9) calculation using the truncated model **6'**. These calculations employed the ZORA-def2-TZVP(-f) basis set on Cu and N with the ZORA-def2-SVP basis set on all other atoms. Occupation of MOs 213 and 214 differentiate the two configurations; these orbitals are printed beneath the diagram. Diagram (d) depicts the single configuration defining the doublet ground state of **9**. The MOs comprise QROs generated produced following an unrestricted B3LYP calculation employing the CP(PPP) basis set on Cu and def2-TZVP(-f) on all other atoms. Orbital plots are depicted at an isovalue of 0.03 au. All orbital labels are based on dominant interaction(s).



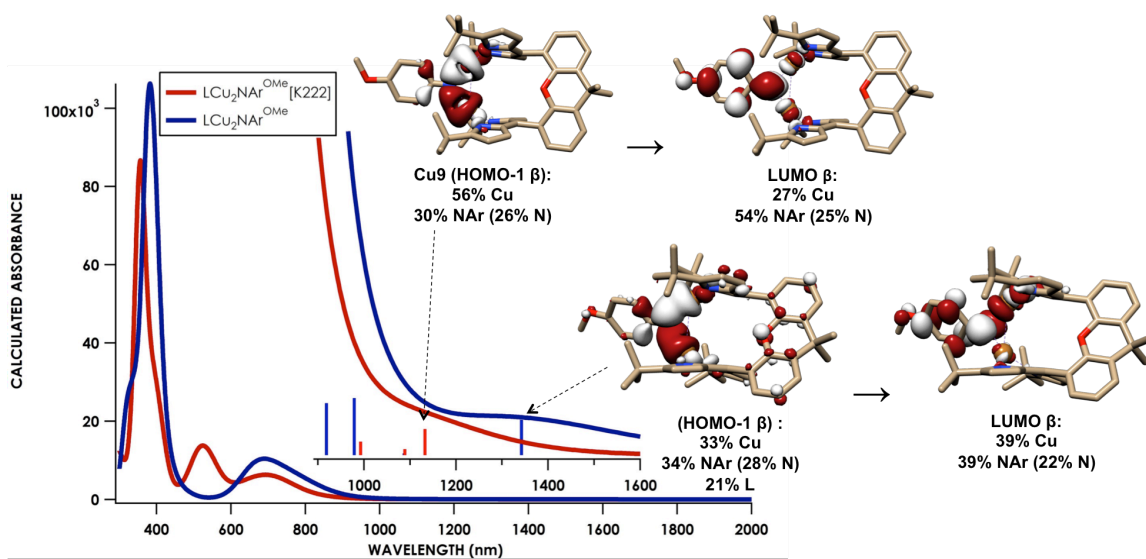

**Figure S-70.** TDDFT analysis of UV-Vis trace for  $[(t^{\text{Bu}}\text{dmx})\text{Cu}_2(\mu^2\text{-N}(\text{C}_6\text{H}_4\text{OMe}))]^n$  ( $n = 0$ , **5**, blue trace) and ( $n = -1$ , **8**, red trace), demonstrating the absorption in the near-infrared region is representative of a metal-to-ligand charge transfer (MLCT) and not an intervalence charge transfer.

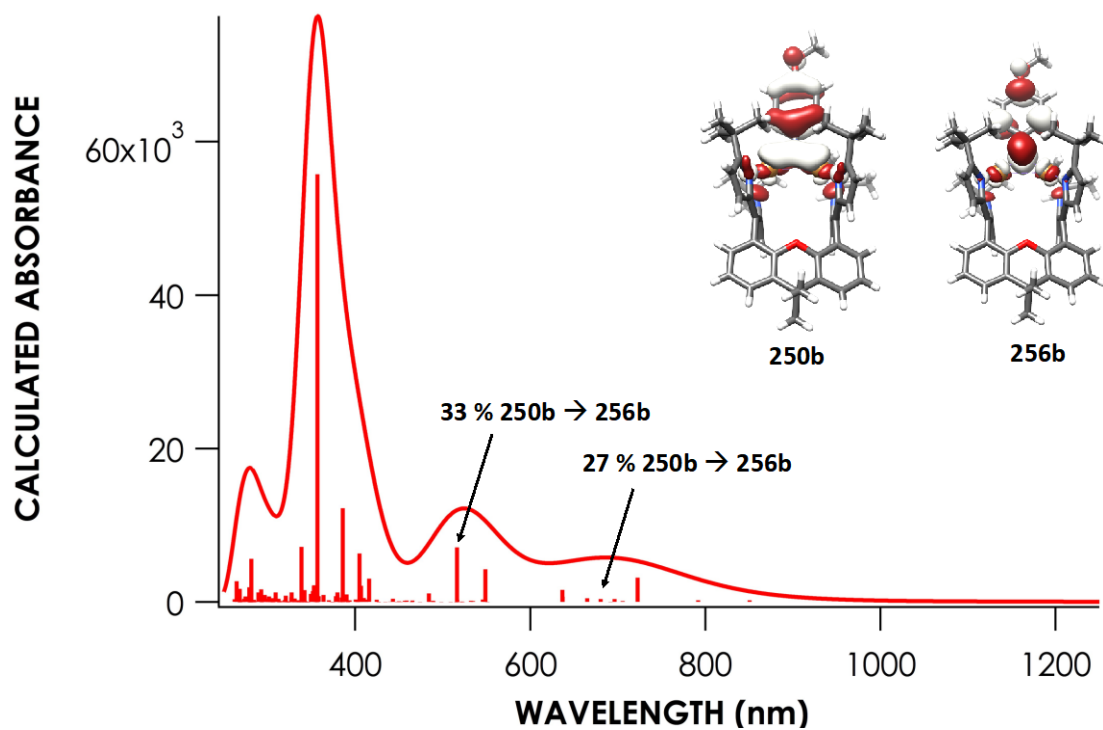

**Figure S-71.** Transitions modeled from TDDFT output of  $[(^t\text{Bu})\text{dmx})\text{Cu}_2(\mu^2\text{-N}(\text{C}_6\text{H}_4\text{OMe}))]^{1-}$  (**8**), demonstrating a nitrenoid-dominant transition and not one assignable to a IVCT.

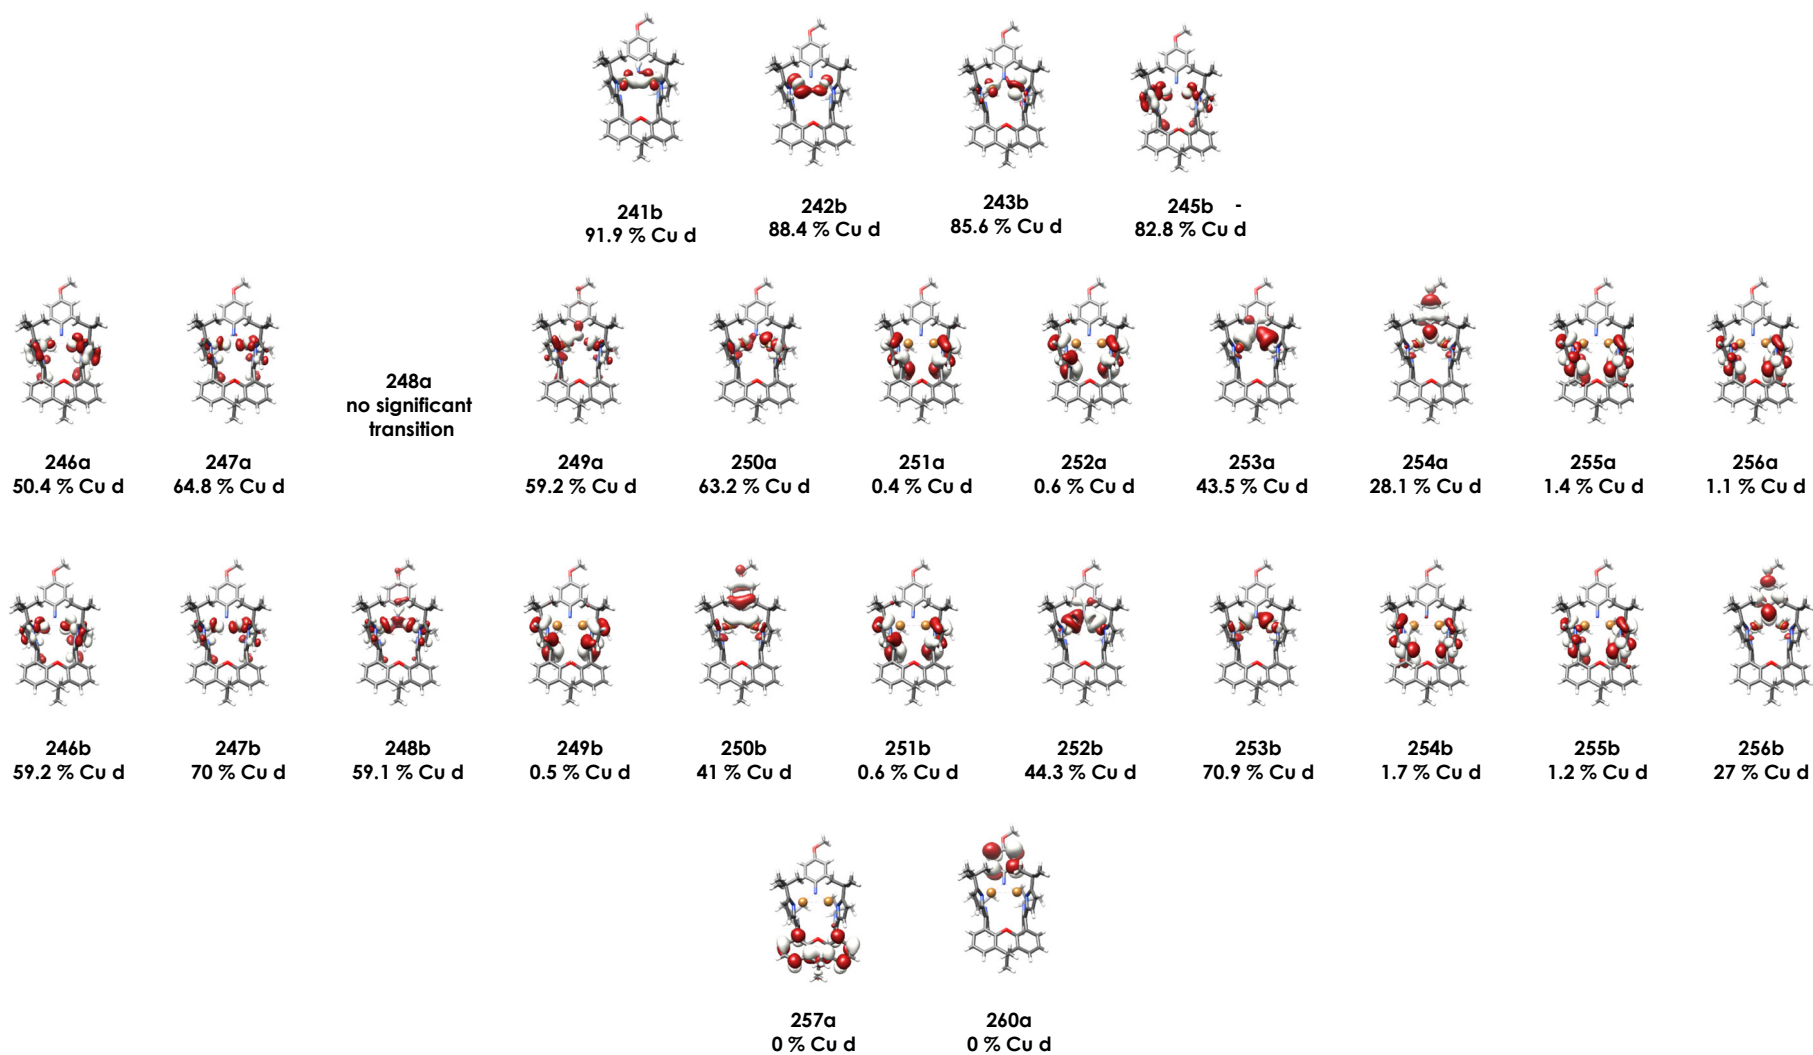

**Figure S-72.** Acceptor orbital Cu parentage by TDDFT for  $[(t^{\text{Bu}}\text{dmx})\text{Cu}_2(\mu^2\text{-N}(\text{C}_6\text{H}_4\text{OMe}))]^{1-}$  (**8**).

| State     | Wavelength (nm) | Transition         | Contribution to State | Donor Orbital d character | Acceptor Orbital d character | Transition Designation |
|-----------|-----------------|--------------------|-----------------------|---------------------------|------------------------------|------------------------|
| 1         | 1132.7          | 252b → 256b        | 0.863813              | 44                        | 27                           | MLCT                   |
| 2         | 1088.8          | 254a → 255a        | 0.969042              | 28                        | 1.4                          | MLCT                   |
| 3         | 992.7           | 254a → 256a        | 0.935631              | 44                        | 27                           | MLCT                   |
| 4         | 850.4           | 253b → 254b        | 0.931253              | 71                        | 1.7                          | MLCT                   |
| 5         | 791.7           | 253b → 255b        | 0.919432              | 71                        | 1.2                          | MLCT                   |
| <b>6</b>  | <b>722.5</b>    | <b>252b → 254b</b> | <b>0.279212</b>       | <b>44</b>                 | <b>1.7</b>                   | <b>MLCT</b>            |
|           |                 | <b>253b → 256b</b> | <b>0.452706</b>       | <b>71</b>                 | <b>27</b>                    |                        |
| 7         | 705.5           | 252a → 255a        | 0.236148              | 0.6                       | 1.4                          | L→L                    |
|           |                 | 251b → 254b        | 0.230769              | 0.6                       | 1.7                          |                        |
|           |                 | 251a → 255a        | 0.139377              | 0.4                       | 1.4                          |                        |
| 8         | 691.5           | 252a → 256a        | 0.196362              | 0.4                       | 1.1                          | L→L                    |
|           |                 | 249b → 254b        | 0.137963              | 0.5                       | 1.7                          |                        |
|           |                 | 251b → 255b        | 0.194885              | 0.6                       | 1.2                          |                        |
| 9         | 696.2           | 253a → 255a        | 0.274547              | 43.5                      | 1.4                          | MLCT                   |
|           |                 | 252b → 254b        | 0.523353              | 44.3                      | 1.7                          |                        |
| 10        | 664.8           | 248b → 256b        | 0.622059              | 59.1                      | 27                           | MLCT                   |
|           |                 | <b>250b → 256b</b> | <b>0.267144</b>       | <b>41</b>                 | <b>27</b>                    | <b>IVCT</b>            |
| 11        | 680.1           | 252b → 255b        | 0.793892              | 44.3                      | 1.2                          | MLCT                   |
| 12        | 636.7           | 253a → 255a        | 0.512318              | 43.5                      | 1.4                          | MLCT                   |
|           |                 | 253a → 256a        | 0.101233              | 43.5                      | 1.1                          |                        |
|           |                 | 252b → 254b        | 0.121769              | 44.3                      | 1.7                          |                        |
| <b>13</b> | <b>636.6</b>    | 253b → 256b        | 0.143598              | 70.9                      | 27                           | <b>MLCT</b>            |
|           |                 | <b>253a → 256a</b> | <b>0.680575</b>       | <b>43.5</b>               | <b>1.1</b>                   |                        |
| <b>14</b> | <b>548.5</b>    | <b>250b → 254b</b> | <b>0.641519</b>       | <b>41</b>                 | <b>1.7</b>                   | <b>MLCT</b>            |
| 15        | 534.5           | 247b → 256b        | 0.821308              | 70                        | 27                           | MLCT                   |
| <b>16</b> | <b>516.2</b>    | <b>249a → 255a</b> | <b>0.121287</b>       | <b>59</b>                 | <b>1.4</b>                   | <b>MLCT</b>            |
|           |                 | <b>248b → 256b</b> | <b>0.148748</b>       | <b>59</b>                 | <b>27</b>                    | <b>MLCT</b>            |
|           |                 | <b>250b → 256b</b> | <b>0.330277</b>       | <b>41</b>                 | <b>27</b>                    | <b>IVCT</b>            |
| 17        | 532.2           | 250a → 255a        | 0.17749               | 63                        | 1.4                          | MLCT                   |
|           |                 | 250b → 255b        | 0.408718              | 41                        | 1.2                          |                        |
| 18        | 516.5           | 250a → 255a        | 0.524526              | 63                        | 1.4                          | MLCT                   |
|           |                 | 248b → 254b        | 0.117277              | 59                        | 1.7                          |                        |
|           |                 | 249a → 255a        | 0.274124              | 59                        | 1.4                          |                        |
| 19        | 520.6           | 248b → 254b        | 0.250591              | 59                        | 1.7                          | MLCT                   |
|           |                 | 250b → 254b        | 0.122908              | 41                        | 1.7                          |                        |
| 20        | 515.5           | 246b → 256b        | 0.335683              | 59                        | 27                           | MLCT/LMCT              |
|           |                 | 251b → 256b        | 0.476303              | 0.6                       | 27                           |                        |

|    |       |             |          |     |     |           |
|----|-------|-------------|----------|-----|-----|-----------|
| 21 | 545.7 | 251a → 255a | 0.111703 | 0.4 | 1.4 | L→L       |
|    |       | 251a → 256a | 0.146406 | 0.4 | 1.1 |           |
|    |       | 252a → 255a | 0.323991 | 0.6 | 1.4 |           |
|    |       | 251b → 254b | 0.22173  | 0.6 | 1.7 |           |
|    |       | 250a → 256a | 0.196162 | 63  | 1.1 |           |
| 22 | 489.2 | 251a → 255a | 0.163869 | 0.4 | 1.4 | MLCT/ L→L |
|    |       | 252a → 256a | 0.168567 | 0.6 | 1.1 |           |
|    |       | 250b → 255b | 0.120438 | 63  | 1.1 |           |
|    |       | 250a → 256a | 0.191594 | 63  | 1.1 |           |
| 23 | 509.0 | 249b → 254b | 0.174072 | 0.5 | 1.7 | MLCT/L→L  |
|    |       | 251b → 255b | 0.122272 | 0.6 | 1.2 |           |
|    |       | 251a → 255a | 0.139133 | 0.4 | 1.4 |           |
| 24 | 522.1 | 252a → 256a | 0.175397 | 0.6 | 1.1 | L→L       |
|    |       | 249b → 254b | 0.19045  | 0.5 | 1.7 |           |
|    |       | 251b → 255b | 0.232141 | 0.6 | 1.2 |           |
|    |       | 250a → 256a | 0.109769 | 63  | 1.1 |           |
|    |       | 251a → 256a | 0.22616  | 0.4 | 1.1 |           |
| 25 | 522.7 | 252a → 255a | 0.106675 | 0.6 | 1.4 | L→L       |
|    |       | 249b → 255b | 0.204289 | 0.5 | 1.2 |           |
|    |       | 249a → 256a | 0.195412 | 59  | 1.1 |           |
|    |       | 250a → 256a | 0.200894 | 63  | 1.1 |           |
| 26 | 498.3 | 248b → 255b | 0.144679 | 59  | 1.2 | MLCT      |
|    |       | 245b → 256b | 0.134757 | 53  | 27  |           |
|    |       | 246b → 256b | 0.111744 | 59  | 27  |           |
| 27 | 484.0 | 249b → 256b | 0.274547 | 0.5 | 27  | MLCT      |
|    |       | 243b → 256b | 0.673105 | 86  | 27  |           |
| 28 | 484.9 | 249b → 256b | 0.165499 | 0.5 | 27  | MLCT      |
|    |       | 243b → 256b | 0.113567 | 86  | 27  |           |
|    |       | 246b → 256b | 0.274643 | 59  | 27  |           |
| 29 | 488.9 | 251b → 256b | 0.386845 | 0.6 | 27  | MLCT/LMCT |
|    |       | 242b → 256b | 0.681053 | 88  | 27  |           |
|    |       | 245b → 256b | 0.101929 | 59  | 27  |           |
| 30 | 465.4 | 249a → 255a | 0.115682 | 59  | 1.4 | MLCT      |
|    |       | 242b → 256b | 0.142888 | 88  | 27  |           |
|    |       | 248b → 254b | 0.134027 | 59  | 1.7 |           |
| 31 | 456.5 | 249b → 256b | 0.372019 | 0.5 | 27  | MLCT/LMCT |
|    |       | 246a → 255a | 0.137962 | 50  | 1.4 |           |
|    |       | 245b → 254b | 0.156189 | 53  | 1.7 |           |
|    |       | 245b → 255b | 0.107942 | 53  | 1.2 |           |
| 32 | 451.8 | 246b → 254b | 0.185657 | 59  | 1.7 | MLCT      |
|    |       |             |          |     |     |           |

|    |       |             |          |    |     |      |
|----|-------|-------------|----------|----|-----|------|
| 33 | 458.6 | 254a → 260a | 0.83395  | 28 | 0   | MLCT |
|    |       | 246a → 256a | 0.146552 | 50 | 1.1 |      |
| 34 | 447.5 | 246b → 254b | 0.116321 | 59 | 1.7 | MLCT |
|    |       | 246b → 255b | 0.22361  | 59 | 1.2 |      |
|    |       | 249a → 255a | 0.158007 | 59 | 1.4 |      |
| 35 | 442.8 | 245b → 256b | 0.213534 | 52 | 27  | MLCT |
|    |       | 248b → 254b | 0.170479 | 59 | 1.7 |      |
| 36 | 449.8 | 249a → 256a | 0.359964 | 59 | 1.1 | MLCT |
|    |       | 248b → 255b | 0.387814 | 59 | 1.2 |      |
| 37 | 551.0 | 254a → 257a | 0.992515 | 28 | 0   | MLCT |
| 38 | 424.6 | 241b → 256b | 0.700793 | 92 | 27  | MLCT |
|    |       | 249a → 256a | 0.112468 | 59 | 1.1 |      |
| 39 | 426.8 | 241b → 256b | 0.172096 | 92 | 27  | MLCT |
|    |       | 247b → 254b | 0.411424 | 70 | 1.7 |      |
| 40 | 426.9 | 247a → 256a | 0.143877 | 65 | 1.1 | MLCT |

**Table S-1.** Assignment of transitions for [ $(t^{\text{Bu}}\text{dmx})\text{Cu}_2(\mu^2\text{-N}(\text{C}_6\text{H}_4\text{OMe}))$ ] $^{1-}$  (**8**), depicting no transition assignable to an IVCT.

**Table S–2.** X-ray diffraction experimental details.<sup>a</sup>

|                                               | <sup>(Mes)</sup> dmx)Cu <sub>2</sub> (NCMe) <sub>2</sub><br>(1)               | <sup>(Mes)</sup> dmx)Cu <sub>2</sub> (μ <sup>2</sup> -<br>N(C <sub>6</sub> H <sub>4</sub> OMe))<br>(2) | <sup>(Mes)</sup> dmx)Cu <sub>2</sub> (μ <sup>2</sup> -<br>N(3,5-(F <sub>3</sub> C) <sub>2</sub> C <sub>6</sub> H <sub>3</sub> ))<br>(3) | <sup>(tBu)</sup> dmx)Cu <sub>2</sub> (μ <sup>2</sup> -<br>N(C <sub>6</sub> H <sub>4</sub> OMe))<br>(5) | <sup>(tBu)</sup> dmx)Cu <sub>2</sub> (μ <sup>2</sup> -<br>N(3,5-(F <sub>3</sub> C) <sub>2</sub> C <sub>6</sub> H <sub>3</sub> ))<br>(6) | [K(C <sub>22</sub> 2)] [ <sup>(Mes)</sup> dmx)Cu <sub>2</sub> (μ <sup>2</sup> -<br>N(C <sub>6</sub> H <sub>4</sub> OMe))]<br>(7) |
|-----------------------------------------------|-------------------------------------------------------------------------------|--------------------------------------------------------------------------------------------------------|-----------------------------------------------------------------------------------------------------------------------------------------|--------------------------------------------------------------------------------------------------------|-----------------------------------------------------------------------------------------------------------------------------------------|----------------------------------------------------------------------------------------------------------------------------------|
| <b>CCDC Entry</b>                             | 1948008                                                                       | 1948009                                                                                                | 1948010                                                                                                                                 | 1948011                                                                                                | 1948012                                                                                                                                 | 1948013                                                                                                                          |
| <b>Moiety Formula</b>                         | C <sub>79</sub> H <sub>83</sub> Cu <sub>2</sub> N <sub>7</sub> O <sub>2</sub> | C <sub>84</sub> H <sub>90</sub> Cu <sub>2</sub> N <sub>5</sub> O <sub>4</sub>                          | C <sub>77</sub> H <sub>67</sub> Cu <sub>2</sub> F <sub>6</sub> N <sub>5</sub> O                                                         | C <sub>60</sub> H <sub>71</sub> Cu <sub>2</sub> N <sub>6</sub> O <sub>3</sub>                          | C <sub>59</sub> H <sub>62</sub> Cu <sub>2</sub> F <sub>6</sub> N <sub>6</sub> O                                                         | C <sub>94</sub> H <sub>107</sub> Cu <sub>2</sub> KN <sub>7</sub> O <sub>8</sub>                                                  |
| <b>FW</b>                                     | 1289.60                                                                       | 1361.69                                                                                                | 1319.43                                                                                                                                 | 1038.17                                                                                                | 1112.22                                                                                                                                 | 1629.04                                                                                                                          |
| <b>λ (nm)</b>                                 | 0.71073                                                                       | 0.71073                                                                                                | 0.41328                                                                                                                                 | 0.71073                                                                                                | 0.71073                                                                                                                                 | 1.54178                                                                                                                          |
| <b>T (K)</b>                                  | 100(2)                                                                        | 100(2)                                                                                                 | 100(2)                                                                                                                                  | 100(2)                                                                                                 | 100(2)                                                                                                                                  | 100(2)                                                                                                                           |
| <b>Crystal System</b>                         | Monoclinic                                                                    | Triclinic                                                                                              | Monoclinic                                                                                                                              | Monoclinic                                                                                             | Orthorhombic                                                                                                                            | Monoclinic                                                                                                                       |
| <b>Space Group (Z)</b>                        | P 2 <sub>1</sub> /n (4)                                                       | P $\bar{1}$ (2)                                                                                        | C 2/c (4)                                                                                                                               | P 2/c (4)                                                                                              | Pna21 (16)                                                                                                                              | P 2 <sub>1</sub> /c (4)                                                                                                          |
| <b>a (Å)</b>                                  | 17.5563(12)                                                                   | 12.304(3)                                                                                              | 23.7718(17)                                                                                                                             | 21.9597(5)                                                                                             | 18.958(2)                                                                                                                               | 17.7584(2)                                                                                                                       |
| <b>b (Å)</b>                                  | 19.7585(14)                                                                   | 16.241(4)                                                                                              | 21.0479(14)                                                                                                                             | 22.7867(5)                                                                                             | 13.0693(16)                                                                                                                             | 26.2650(3)                                                                                                                       |
| <b>c (Å)</b>                                  | 20.6328(14)                                                                   | 18.007(5)                                                                                              | 17.5589(12)                                                                                                                             | 21.3984(5)                                                                                             | 43.638(5)                                                                                                                               | 24.6763(3)                                                                                                                       |
| <b>α (°)</b>                                  | 90                                                                            | 92.531(4)                                                                                              | 90                                                                                                                                      | 90                                                                                                     | 90                                                                                                                                      | 90                                                                                                                               |
| <b>β (°)</b>                                  | 111.704(2)                                                                    | 92.075(5)                                                                                              | 113.5650(10)                                                                                                                            | 92.534(2)                                                                                              | 90                                                                                                                                      | 105.2606(12)                                                                                                                     |
| <b>γ (°)</b>                                  | 90                                                                            | 92.793(5)                                                                                              | 90                                                                                                                                      | 90                                                                                                     | 90                                                                                                                                      | 90                                                                                                                               |
| <b>Volume (Å<sup>3</sup>)</b>                 | 6649.8(8)                                                                     | 3587.8(15)                                                                                             | 8052.9(10)                                                                                                                              | 10697.1(4)                                                                                             | 10812(2)                                                                                                                                | 11103.8(2)                                                                                                                       |
| <b>Calc. ρ (mg/m<sup>3</sup>)</b>             | 1.288                                                                         | 1.260                                                                                                  | 1.088                                                                                                                                   | 1.289                                                                                                  | 1.367                                                                                                                                   | 0.974                                                                                                                            |
| <b>μ (mm<sup>-1</sup>)</b>                    | 0.693                                                                         | 0.647                                                                                                  | 0.142                                                                                                                                   | 0.844                                                                                                  | 0.854                                                                                                                                   | 1.171                                                                                                                            |
| <b>Crystal Size (mm)</b>                      | 0.10x0.11x0.24                                                                | 0.09x0.16x0.21                                                                                         | 0.07x0.10x0.11                                                                                                                          | 0.22x0.27x0.39                                                                                         | 0.09x0.23x0.34                                                                                                                          | 0.12x0.13x0.34                                                                                                                   |
| <b>Reflections</b>                            | 11828                                                                         | 12852                                                                                                  | 7108                                                                                                                                    | 18897                                                                                                  | 16866                                                                                                                                   | 19446                                                                                                                            |
| <b>Completeness (to 2θ)</b>                   | 0.998                                                                         | 0.989                                                                                                  | 0.995                                                                                                                                   | 0.999                                                                                                  | 0.992                                                                                                                                   | 0.992                                                                                                                            |
| <b>GOF on F<sup>2</sup></b>                   | 1.075                                                                         | 1.001                                                                                                  | 1.053                                                                                                                                   | 1.147                                                                                                  | 1.038                                                                                                                                   | 1.020                                                                                                                            |
| <b>R1, wR2<sup>a</sup><br/>[I &gt; 2σ(I)]</b> | 0.0467, 0.0993                                                                | 0.0679, 0.1607                                                                                         | 0.0393, 0.0971                                                                                                                          | 0.0988, 0.2228                                                                                         | 0.0538, 0.1135                                                                                                                          | 0.0639, 0.1715                                                                                                                   |
| <b>(R1, wR2)<br/>[all data]</b>               | 0.0723, 0.1105                                                                | 0.1282, 0.1948                                                                                         | 0.0536, 0.0971                                                                                                                          | 0.1462, 0.2560                                                                                         | 0.0865, 0.1329                                                                                                                          | 0.0802, 0.1836                                                                                                                   |

<sup>a</sup>  $R1 = \sum ||F_o| - |F_c|| / \sum |F_o|$ ,  $wR2 = \{\sum [w(F_o^2 - F_c^2)^2] / \sum [w(F_o^2)^2]\}^{1/2}$

|                                   | [K(C <sub>222</sub> )][( <sup>t</sup> Bu <sub>3</sub> dmx)Cu <sub>2</sub> (μ <sup>2</sup> -N(C <sub>6</sub> H <sub>4</sub> OMe))]<br><b>(8)</b> | [K(C <sub>222</sub> )][( <sup>t</sup> Bu <sub>3</sub> dmx)Cu <sub>2</sub> (μ <sup>2</sup> -N(3,5-(F <sub>3</sub> C) <sub>2</sub> C <sub>6</sub> H <sub>3</sub> ))]<br><b>(9)</b> | ( <sup>t</sup> Bu <sub>3</sub> L)Cu(NCMe)<br><b>(10)</b>         | [( <sup>t</sup> Bu <sub>3</sub> L)CuCl] <sub>2</sub><br><b>(11)</b> | ( <sup>Mes</sup> dmx)Cu <sub>2</sub> (PMe <sub>3</sub> ) <sub>2</sub><br><b>(12)</b>         | ( <sup>t</sup> Bu <sub>3</sub> dmx)Cu <sub>2</sub> (PPh <sub>3</sub> )<br><b>(13)</b> |
|-----------------------------------|-------------------------------------------------------------------------------------------------------------------------------------------------|----------------------------------------------------------------------------------------------------------------------------------------------------------------------------------|------------------------------------------------------------------|---------------------------------------------------------------------|----------------------------------------------------------------------------------------------|---------------------------------------------------------------------------------------|
| <b>CCDC Entry</b>                 | 1948014                                                                                                                                         | 1948015                                                                                                                                                                          | 1948016                                                          | 1948017                                                             | 1948018                                                                                      | 1948019                                                                               |
| <b>Moiety Formula</b>             | C <sub>81</sub> H <sub>117</sub> Cu <sub>2</sub> KN <sub>7</sub> O <sub>10</sub>                                                                | C <sub>75</sub> H <sub>95</sub> Cu <sub>2</sub> F <sub>6</sub> KN <sub>7</sub> O <sub>7</sub>                                                                                    | C <sub>26</sub> H <sub>30</sub> Cl <sub>2</sub> CuN <sub>4</sub> | C <sub>29</sub> H <sub>31</sub> Cl <sub>3</sub> CuN <sub>2</sub>    | C <sub>79</sub> H <sub>90</sub> Cu <sub>2</sub> N <sub>4</sub> O <sub>4</sub> P <sub>2</sub> | C <sub>97</sub> H <sub>100</sub> Cu <sub>2</sub> N <sub>4</sub> OP <sub>2</sub>       |
| <b>FW</b>                         | 1510.48                                                                                                                                         | 1486.75                                                                                                                                                                          | 525.47                                                           | 577.45                                                              | 1316.56                                                                                      | 1524.57                                                                               |
| <b>λ (nm)</b>                     | 0.71073                                                                                                                                         | 0.71073                                                                                                                                                                          | 0.71073                                                          | 0.71073                                                             | 0.71073                                                                                      | 0.71073                                                                               |
| <b>T (K)</b>                      | 100(2)                                                                                                                                          | 100(2)                                                                                                                                                                           | 100(2)                                                           | 100(2)                                                              | 100(2)                                                                                       | 100(2)                                                                                |
| <b>Crystal System</b>             | Monoclinic                                                                                                                                      | Monoclinic                                                                                                                                                                       | Monoclinic                                                       | Monoclinic                                                          | Triclinic                                                                                    | Monoclinic                                                                            |
| <b>Space Group (Z)</b>            | P 2 <sub>1</sub> /n (4)                                                                                                                         | P 2 <sub>1</sub> /n (4)                                                                                                                                                          | C 2/c (4)                                                        | P 2 <sub>1</sub> /n (4)                                             | P $\bar{1}$ (2)                                                                              | C 2/c (4)                                                                             |
| <b>a (Å)</b>                      | 17.164(3)                                                                                                                                       | 13.347(2)                                                                                                                                                                        | 36.448(4)                                                        | 13.1817(13)                                                         | 11.0169(6)                                                                                   | 57.196(11)                                                                            |
| <b>b (Å)</b>                      | 18.401(3)                                                                                                                                       | 41.261(6)                                                                                                                                                                        | 11.0154(11)                                                      | 10.7516(19)                                                         | 15.6053(7)                                                                                   | 25.306(4)                                                                             |
| <b>c (Å)</b>                      | 27.309(4)                                                                                                                                       | 13.763(2)                                                                                                                                                                        | 13.4471(12)                                                      | 19.191(3)                                                           | 21.4320(11)                                                                                  | 26.078(3)                                                                             |
| <b>α (°)</b>                      | 90                                                                                                                                              | 90                                                                                                                                                                               | 90                                                               | 90                                                                  | 80.283(4)                                                                                    | 90                                                                                    |
| <b>β (°)</b>                      | 104.668(4)                                                                                                                                      | 97.390(3)                                                                                                                                                                        | 105.928(3)                                                       | 95.400(8)                                                           | 89.945(4)                                                                                    | 117.092(7)                                                                            |
| <b>γ (°)</b>                      | 90                                                                                                                                              | 90                                                                                                                                                                               | 90                                                               | 90                                                                  | 74.102(4)                                                                                    | 90                                                                                    |
| <b>Volume (Å<sup>3</sup>)</b>     | 8344(2)                                                                                                                                         | 7516(2)                                                                                                                                                                          | 5191.6(9)                                                        | 2707.7(7)                                                           | 3488.9(3)                                                                                    | 33604(10)                                                                             |
| <b>Calc. ρ (mg/m<sup>3</sup>)</b> | 1.202                                                                                                                                           | 1.314                                                                                                                                                                            | 1.345                                                            | 1.417                                                               | 1.253                                                                                        | 1.205                                                                                 |
| <b>μ (mm<sup>-1</sup>)</b>        | 0.617                                                                                                                                           | 0.692                                                                                                                                                                            | 1.067                                                            | 1.124                                                               | 0.704                                                                                        | 0.594                                                                                 |
| <b>Crystal Size (mm)</b>          | 0.35x0.39x1.00                                                                                                                                  | 0.23x0.40x1.00                                                                                                                                                                   | 0.13x0.15x0.26                                                   | 0.08x0.10x0.12                                                      | 0.09x0.13x0.14                                                                               | 0.14x0.26x0.38                                                                        |
| <b>Reflections</b>                | 14724                                                                                                                                           | 13315                                                                                                                                                                            | 4558                                                             | 4789                                                                | 12313                                                                                        | 30048                                                                                 |
| <b>Completeness (to 2θ)</b>       | 1.000                                                                                                                                           | 0.999                                                                                                                                                                            | 0.987                                                            | 0.996                                                               | 0.998                                                                                        | 0.989                                                                                 |
| <b>GOF on F<sup>2</sup></b>       | 1.043                                                                                                                                           | 1.012                                                                                                                                                                            | 1.117                                                            | 1.034                                                               | 1.007                                                                                        | 1.052                                                                                 |
| <b>R1, wR2<sup>a</sup></b>        | 0.0370, 0.0969                                                                                                                                  | 0.0402, 0.0866                                                                                                                                                                   | 0.0691, 0.1072                                                   | 0.0528, 0.1184                                                      | 0.0554, 0.0914                                                                               | 0.0744, 0.1635                                                                        |
| <b>[I &gt; 2σ(I)]</b>             |                                                                                                                                                 |                                                                                                                                                                                  |                                                                  |                                                                     |                                                                                              |                                                                                       |
| <b>(R1, wR2)</b>                  | 0.0504, 0.1035                                                                                                                                  | 0.0561, 0.0932                                                                                                                                                                   | 0.1199, 0.1194                                                   | 0.0769, 0.1310                                                      | 0.1198, 0.1085                                                                               | 0.1338, 0.1931                                                                        |
| <b>[all data]</b>                 |                                                                                                                                                 |                                                                                                                                                                                  |                                                                  |                                                                     |                                                                                              |                                                                                       |



|                                   | ( <sup>Mes</sup> dmx)Cu <sub>2</sub> (CN <sup>t</sup> Bu) <sub>2</sub><br><b>(14)</b> | ( <sup>t</sup> Bu <sub>4</sub> dmx)Cu <sub>2</sub> (CN <sup>t</sup> Bu) <sub>2</sub><br><b>(15)</b> | ( <sup>Mes</sup> dmx)Cu <sub>2</sub> (dmap) <sub>2</sub><br><b>(16)</b>        | [( <sup>t</sup> Bu <sub>4</sub> L)Cu] <sub>2</sub><br><b>(18)</b>              |
|-----------------------------------|---------------------------------------------------------------------------------------|-----------------------------------------------------------------------------------------------------|--------------------------------------------------------------------------------|--------------------------------------------------------------------------------|
|                                   | 1948020                                                                               | 1948021                                                                                             | 1948022                                                                        | 1948023                                                                        |
| <b>Moiety Formula</b>             | C <sub>85</sub> H <sub>94</sub> Cu <sub>2</sub> N <sub>6</sub> O <sub>3</sub>         | C <sub>63</sub> H <sub>82</sub> Cu <sub>2</sub> N <sub>6</sub> O <sub>2</sub>                       | C <sub>95</sub> H <sub>111</sub> Cu <sub>2</sub> N <sub>8</sub> O <sub>4</sub> | C <sub>46</sub> H <sub>50</sub> Cl <sub>4</sub> Cu <sub>2</sub> N <sub>4</sub> |
| <b>FW</b>                         | 1366.23                                                                               | 1082.42                                                                                             | 1555.49                                                                        | 927.78                                                                         |
| <b>λ (nm)</b>                     | 0.71073                                                                               | 0.71073                                                                                             | 0.71073                                                                        | 0.71073                                                                        |
| <b>T (K)</b>                      | 100(2)                                                                                | 100(2)                                                                                              | 100(2)                                                                         | 100(2)                                                                         |
| <b>Crystal System</b>             | Triclinic                                                                             | Monoclinic                                                                                          | Monoclinic                                                                     | Monoclinic                                                                     |
| <b>Space Group (Z)</b>            | <i>P</i> $\bar{1}$ (2)                                                                | <i>P</i> 2 <sub>1</sub> / <i>n</i> (4)                                                              | <i>P</i> 2 <sub>1</sub> / <i>n</i> (4)                                         | <i>P</i> 2 <sub>1</sub> / <i>n</i> (4)                                         |
| <b>a (Å)</b>                      | 12.031(5)                                                                             | 16.3247(7)                                                                                          | 13.3375(5)                                                                     | 11.189(9)                                                                      |
| <b>b (Å)</b>                      | 14.049(6)                                                                             | 18.2917(8)                                                                                          | 25.1228(7)                                                                     | 17.657(12)                                                                     |
| <b>c (Å)</b>                      | 24.368(11)                                                                            | 20.5023(9)                                                                                          | 25.4322(7)                                                                     | 22.207(15)                                                                     |
| <b>α (°)</b>                      | 99.925(7)                                                                             | 90                                                                                                  | 90                                                                             | 90                                                                             |
| <b>β (°)</b>                      | 99.557(8)                                                                             | 106.3000(10)                                                                                        | 100.624(3)                                                                     | 95.88(2)                                                                       |
| <b>γ (°)</b>                      | 105.278(7)                                                                            | 90                                                                                                  | 90                                                                             | 90                                                                             |
| <b>Volume (Å<sup>3</sup>)</b>     | 3816(3)                                                                               | 5876.0(4)                                                                                           | 8375.6(4)                                                                      | 4364(6)                                                                        |
| <b>Calc. ρ (mg/m<sup>3</sup>)</b> | 1.189                                                                                 | 1.224                                                                                               | 1.234                                                                          | 1.412                                                                          |
| <b>μ (mm<sup>-1</sup>)</b>        | 0.608                                                                                 | 0.770                                                                                               | 0.564                                                                          | 1.257                                                                          |
| <b>Crystal Size (mm)</b>          | 0.12x0.19x0.42                                                                        | 0.12x0.15x0.20                                                                                      | 0.05x0.15x0.48                                                                 | 0.29x0.37x0.49                                                                 |
| <b>Reflections</b>                | 13626                                                                                 | 10423                                                                                               | 14837                                                                          | 7739                                                                           |
| <b>Completeness (to 2θ)</b>       | 0.987                                                                                 | 0.999                                                                                               | 0.999                                                                          | 0.992                                                                          |
| <b>GOF on F<sup>2</sup></b>       | 1.021                                                                                 | 0.911                                                                                               | 1.030                                                                          | 1.027                                                                          |
| <b>R1, wR2<sup>a</sup></b>        | 0.0621, 0.1718                                                                        | 0.0342, 0.0658                                                                                      | 0.0734, 0.1786                                                                 | 0.0354, 0.0828                                                                 |
| <b>[I &gt; 2σ(I)]</b>             |                                                                                       |                                                                                                     |                                                                                |                                                                                |
| <b>(R1, wR2)</b>                  | 0.0927, 0.1921                                                                        | 0.0628, 0.0716                                                                                      | 0.1323, 0.2128                                                                 | 0.0522, 0.0921                                                                 |
| <b>[all data]</b>                 |                                                                                       |                                                                                                     |                                                                                |                                                                                |

**X-Ray Diffraction Techniques.** All structures were collected on a Bruker three-circle platform goniometer equipped with an Apex II CCD and an Oxford cryostream-cooling device. Radiation was from a graphite fine focus sealed tube Mo K $\alpha$  ( $\lambda = 0.71073 \text{ \AA}$ ) source (**1**, **2**, **5–6**, **8–18**) or from a Cu K $\alpha$  ( $\lambda = 1.54178 \text{ \AA}$ ) source (**7**). The structure of **3** was collected using synchrotron radiation. Data was collected as a series of  $\varphi$  and/or  $\omega$  scans. Data integration down to  $0.84 \text{ \AA}$  resolution was carried out using SAINT V8.37 A<sup>20</sup> with reflection spot size optimization. Absorption corrections were made with the program SADABS.<sup>21,22</sup> Space group assignments were determined by examination of systematic absences, E-statistics, and successive refinement of the structures. The structure was solved by the Intrinsic Phasing methods and refined by least-squares methods again  $F^2$  using SHELXT-2014<sup>22</sup> and SHELXL-2014<sup>23</sup> with the OLEX2 interface.<sup>24</sup> The program PLATON was employed to confirm the absence of higher symmetry space groups.<sup>25</sup> All non-H atoms, including the disorder fragments, were located in difference Fourier maps, and then refined anisotropically. The restraints on bond lengths and constraints of the atomic displacement parameters on each pair of disorder fragments (SADI/SAME and EADP instructions of SHELXL-2014)<sup>23</sup> as well as the restraints of the atomic displacement parameters (SIMU/RIGU instructions of SHELXL-2014) if necessary, have been applied for the disorder refinement.<sup>26</sup> All non-hydrogen atoms were refined anisotropically. Outlier reflections were omitted from refinement when appropriate. Hydrogen atoms on C atoms were placed at idealized positions and refined using a riding model. The isotropic displacement parameters of all hydrogen atoms were fixed to 1.2 times the atoms they are linked to (1.5 times for methyl groups). Crystallographic refinement details, including disorder modeling and software employed, have been delineated within in each crystallographic information file (\*.cif).

Molecular graphics were generated using POV-Ray v3.7.<sup>27</sup>

**Specific structural refinement details are as followed:**

(<sup>Mes</sup>**dmx**)Cu<sub>2</sub>(NCMe)<sub>2</sub> (**1**). The structure was solved in the monoclinic space group P 2<sub>1</sub>/n with one molecule of copper-containing complex per asymmetric unit and four molecules per unit cell. One molecule of acetonitrile and one molecule of diethyl ether were located and refined at full occupancy. CCDC Identifier: 1948008.

**(<sup>Mes</sup>dmx)Cu<sub>2</sub>(μ<sup>2</sup>-N(C<sub>6</sub>H<sub>4</sub>OMe)) (2).** The structure was solved in the triclinic space group  $P\bar{1}$  with one molecule of copper-containing complex per asymmetric unit and two molecules per unit cell. Two molecules of diethyl ether were located and refined at full occupancy, one of which exhibited positional disorder and was modeled using similarity constraints and restraints. CCDC Identifier: 1948009.

**(<sup>Mes</sup>dmx)Cu<sub>2</sub>(μ<sup>2</sup>-N(3,5-(F<sub>3</sub>C)<sub>2</sub>C<sub>6</sub>H<sub>3</sub>)) (3).** The structure was solved in the monoclinic space group  $C2/c$  with one molecule of copper-containing complex per asymmetric unit and four molecules per unit cell. The solvent mask function in Olex2 was applied to correct for electron density contributing from a putative highly disordered diethyl ether molecule. CCDC Identifier: 1948010.

**(<sup>Bu</sup>dmx)Cu<sub>2</sub>(μ<sup>2</sup>-N(C<sub>6</sub>H<sub>4</sub>OMe)) (5).** The structure was solved in the monoclinic space group  $P2_1/n$  with two molecules of copper-containing complex per asymmetric unit and eight molecules per unit cell. Two molecules of acetonitrile were located and refined to full occupancy and 75 % occupancy. Two molecules of diethyl ether were located, one residing on a special position, and refined to full occupancy using similarity constraints and restraints. CCDC Identifier: 1948011.

**(<sup>Bu</sup>dmx)Cu<sub>2</sub>(μ<sup>2</sup>-N(3,5-(F<sub>3</sub>C)<sub>2</sub>C<sub>6</sub>H<sub>3</sub>)) (6).** The structure was solved in the orthorhombic space group  $Pna2_1$  with two molecules of copper-containing complex per asymmetric unit and sixteen molecules per unit cell. Two molecules of acetonitrile were located and refined with occupancies of unity. The structure was refined as a Merohedral twin using the twin law  $[(-1.0, 0.0, 0.0), (0.0, -1.0, 0.0), (0.0, 0.0, -1.0)]$ . The trifluoromethyl substituents were rotationally disordered and modeled in parts using restraints and constraints. The *tert*-butyl substituents were rotationally disordered and modeled in parts using restraints and constraints. CCDC Identifier: 1948012.

**[(K(C<sub>222</sub>))][(<sup>Mes</sup>dmx)Cu<sub>2</sub>(μ<sup>2</sup>-N(C<sub>6</sub>H<sub>4</sub>OMe))] (7).** The structure was solved in the monoclinic space group  $P2_1/n$  with one molecule of copper-containing complex with an outer-sphere cryptand-encapsulated potassium counterion per asymmetric unit and four molecules in the unit cell. A highly disordered, diffuse benzene/tetrahydrofuran channel was observed, and attempts at producing a chemically reasonable model required excessive application of similarity restraints

and constraints. A solvent mask was subsequently applied to remove unrefined electron density. Several reflections were co-incidental with the beamstop and were omitted from refinement.

In several crystal mounting attempts, we observed rapid crystal degradation upon allowing the crystal to stand in Paratone at room temperature over seconds. This degradation is denoted by a color change from brown-pink to deep red and a smearing of reflections in the diffraction pattern. The changes in diffraction pattern may be similarly attributed to the desolvation of the unit cell. The recorded data set represents the best data quality after employing an optimized mounting protocol to minimize exposure to room temperature, multiple data collection sets, and multiple crystallization attempts. CCDC Identifier: 1948013.

**[(K(C<sub>222</sub>))[(<sup>t</sup>Bu<sub>3</sub>dmx)Cu<sub>2</sub>(μ<sup>2</sup>-N(C<sub>6</sub>H<sub>4</sub>OMe))]] (8).** The structure was solved in the monoclinic space group P 2<sub>1</sub>/n with one molecule of copper-containing complex with an outer-sphere cryptand-encapsulated potassium counterion per asymmetric unit and four molecules per unit cell. One diethyl ether molecule was located and refined at full occupancy. A second diethyl ether molecule was refined with partial occupancy (75 % occupancy) with the oxygen atom disordered over two sites. Two sets of the *tert*-butyl substituents exhibited rotational disorder, addressed using similarity restraints and constraints. CCDC Identifier: 1948014.

**[(K(C<sub>222</sub>))[(<sup>t</sup>Bu<sub>3</sub>dmx)Cu<sub>2</sub>(μ<sup>2</sup>-N(3,5-(F<sub>3</sub>C)<sub>2</sub>C<sub>6</sub>H<sub>3</sub>))]] (9).** The structure was solved in the monoclinic space group P 2<sub>1</sub>/n with one molecule of copper-containing complex with an outer-sphere cryptand-encapsulated potassium counterion per asymmetric unit and four molecules per unit cell. One set of *tert*-butyl substituents exhibited part rotational disorder, addressed using similarity restraints and constraints. Rotational disorder for one trifluoromethyl substituent was modeled using similarity constraints and restraints. CCDC Identifier: 1948015.

**(<sup>t</sup>BuL)Cu(NCMe) (10).** The structure was solved in the monoclinic space group C 2/c with one molecule of copper-containing complex per asymmetric unit and four molecules per unit cell. An acetonitrile molecule was modeled at full occupancy. CCDC Identifier: 1948016.

**[(<sup>t</sup>BuL)CuCl]<sub>2</sub> (11).** The structure was solved in the monoclinic space group P 2<sub>1</sub>/n with one molecule of copper-containing complex per asymmetric unit and four molecules per unit cell. A

benzene molecule was modeled with full occupancy. Several reflections were co-incidental with the beamstop and were omitted from refinement. CCDC Identifier: 1948017.

**(<sup>Mes</sup>dmx)Cu<sub>2</sub>(PMe<sub>3</sub>)<sub>2</sub> (12).** The structure was solved in the triclinic space group  $P\bar{1}$  with one molecule of copper-containing complex per asymmetric unit and two molecules per unit cell. A single disordered tetrahydrofuran molecule was located and refined at full occupancy with similarity restraints and constraints. Several reflections were co-incidental with the beamstop and were omitted from refinement. CCDC Identifier: 1948018.

**(<sup>Bu</sup>dmx)Cu<sub>2</sub>(PPh<sub>3</sub>)<sub>2</sub> (13).** The structure was solved in the monoclinic space group  $C 2/c$  with two molecule of copper-containing complexes per asymmetric unit and eight molecules per unit cell. Four sets of the *tert*-butyl substituents exhibited rotational disorder, addressed using similarity restraints and constraints. One phenyl ring within the triphenylphosphine motif was disordered and modeled with similarity constraints and restraints. Three molecules of toluene were located and refined with partial occupancies using similarity restraints and constraints. A disordered benzene molecule was located and modeled using similarity restraints and constraints. Several reflections were co-incidental with the beamstop and were omitted from final refinement, resulting in a 'B'-level CheckCif alert. CCDC Identifier: 1948019.

**(<sup>Mes</sup>dmx)Cu<sub>2</sub>(CN<sup>t</sup>Bu)<sub>2</sub> (14).** The structure was solved in the triclinic space group  $P\bar{1}$  with one molecule of copper-containing complex per asymmetric unit and two molecules per unit cell. One set of the *tert*-butyl substituents within the isocyanide motif exhibited rotational disorder, which was addressed with similarity constraints. Two molecules of tetrahydrofuran (50 % occupancy, 25 % occupancy) were overlapping two molecules of diethyl ether (50 % occupancy, 25 % occupancy) and modeled with similarity constraints and restraints. Several reflections were co-incidental with the beamstop and were omitted from refinement. CCDC Identifier: 1948020.

**(<sup>Bu</sup>dmx)Cu<sub>2</sub>(CN<sup>t</sup>Bu)<sub>2</sub> (15).** The structure was solved in the monoclinic space group  $P 2_1/n$  with one molecule of copper-containing complex per asymmetric unit and four molecules per unit cell. One set of the *tert*-butyl substituents within the isocyanide motif exhibited rotational disorder, which was addressed with similarity constraints. A disordered tetrahydrofuran molecule

was refined at full occupancy using similarity constraints and restraints. CCDC Identifier: 1948021.

**(<sup>Mes</sup>dmx)Cu<sub>2</sub>(dmap)<sub>2</sub> (16)**. The structure was solved in the monoclinic space group P 2<sub>1</sub>/n with one molecule of copper-containing complex per asymmetric unit and four molecules per unit cell. The dimethylxanthene backbone was disordered over two positions and refined appropriately. Molecules of overlapping diethyl ether and tetrahydrofuran were modeled using similarity constraints and restraints. CCDC Identifier: 1948022.

**(<sup>tBu</sup>L)<sub>2</sub>Cu<sub>2</sub> (18)**. The structure was solved in the monoclinic space group P 2<sub>1</sub>/n with one molecule of copper-containing complex per asymmetric unit. CCDC Identifier: 1948023.

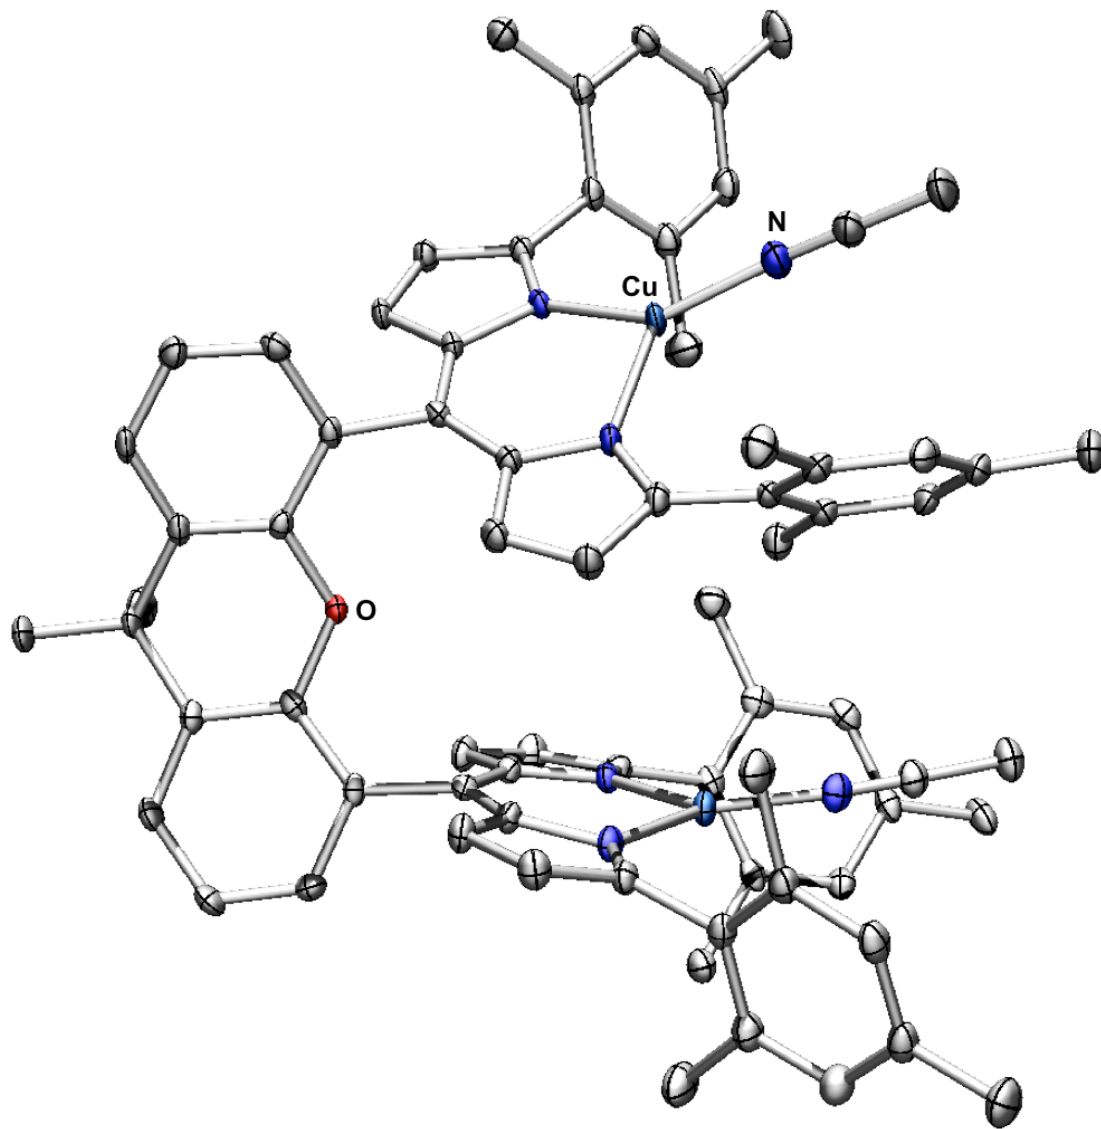

**Figure S–73.** Solid-state molecular structure of  $(^{\text{Mes}}\text{dmx})\text{Cu}_2(\text{NCMe})_2$  (**1**) with thermal ellipsoids at 50 % probability level. Hydrogen atoms and solvent molecules are omitted for clarity. Color scheme: Cu (cobalt blue), N (blue), O (red).

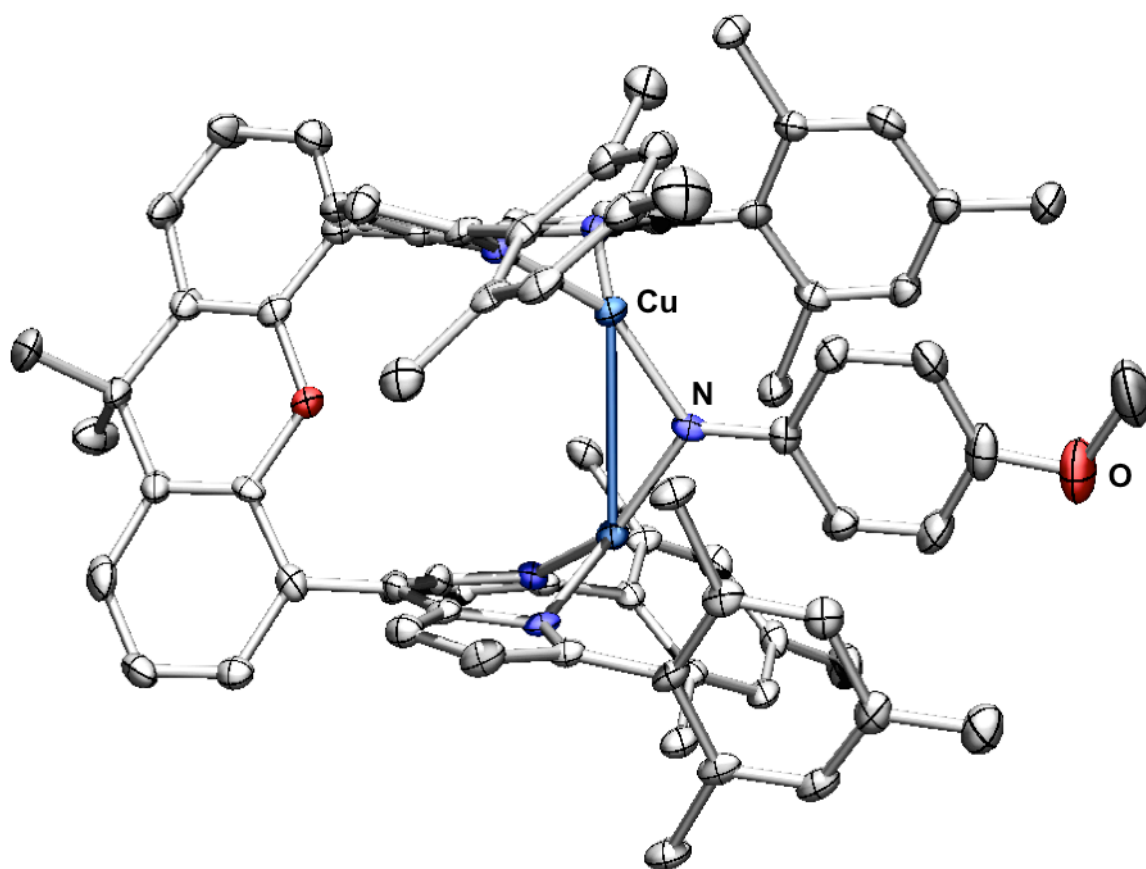

**Figure S-74.** Solid-state molecular structure of  $(^{\text{Mes}}\text{dmx})\text{Cu}_2(\mu^2\text{-N}(\text{C}_6\text{H}_4\text{OMe}))$  (**2**) with thermal ellipsoids at 50 % probability level. Hydrogen atoms and solvent molecules are omitted for clarity. Color scheme: Cu (cobalt blue), N (blue), O (red).



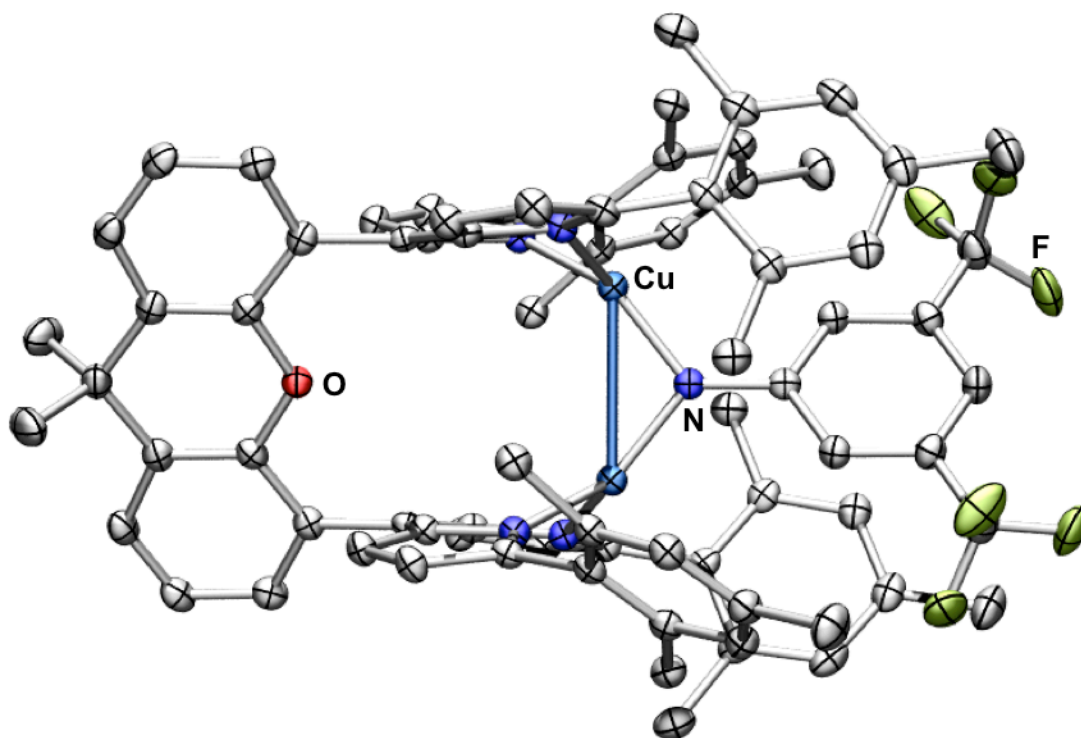

**Figure S-75.** Solid-state molecular structure of (<sup>Mes</sup>dmx)Cu<sub>2</sub>(μ<sup>2</sup>-N(3,5-(CF<sub>3</sub>)<sub>2</sub>C<sub>6</sub>H<sub>3</sub>)) (**3**) with thermal ellipsoids at 50 % probability level. Hydrogen atoms, solvent molecules, and rotational disorder of the trifluoromethyl units are omitted for clarity. Color scheme: Cu (cobalt blue), F (yellow-green), N (blue), O (red).

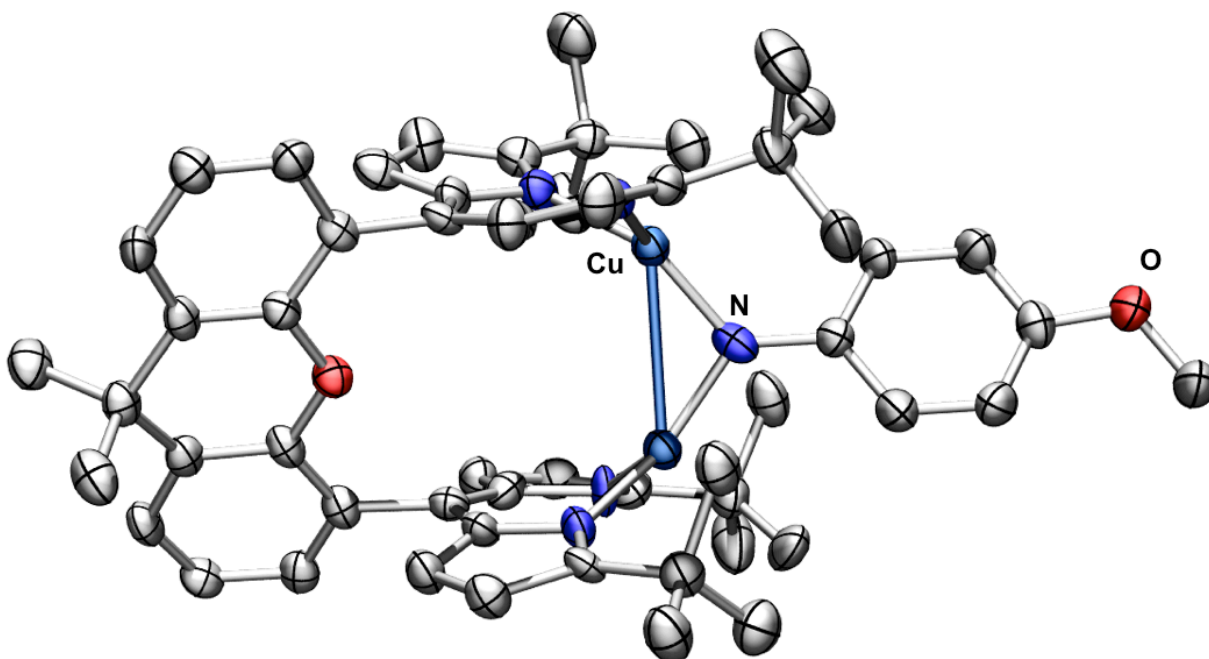

**Figure S-76.** Solid-state molecular structure of  $({}^t\text{Bu-dmx})\text{Cu}_2(\mu^2\text{-N}(\text{C}_6\text{H}_4\text{OMe}))$  (**5**) with thermal ellipsoids at 50 % probability level. Hydrogen atoms and solvent molecules in the unit cell are omitted for clarity. Color scheme: Cu (cobalt blue), N (blue), O (red).

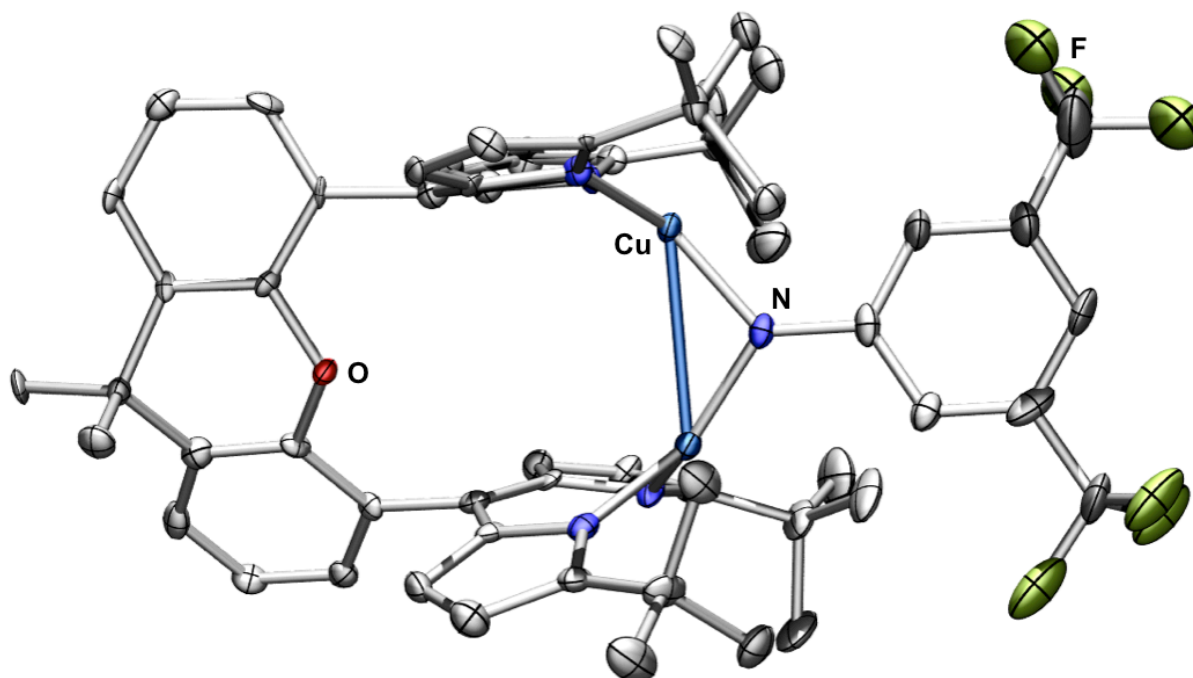

**Figure S-77.** Solid-state molecular structure of  $(t\text{Bu-dmx})\text{Cu}_2(\mu^2\text{-N}(3,5\text{-(CF}_3)_2\text{C}_6\text{H}_3))$  (**6**) with thermal ellipsoids at 50 % probability level. Hydrogen atoms, disorder, and solvent molecules in the unit cell are omitted for clarity. Color scheme: Cu (cobalt blue), F (yellow-green), N (blue), O (red).

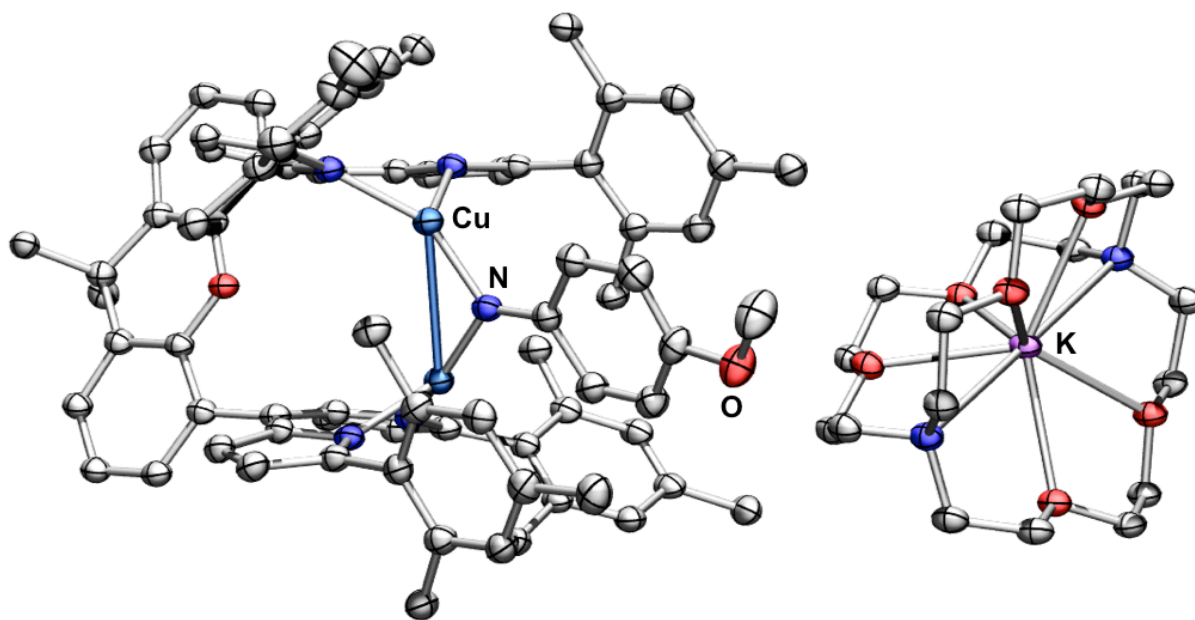

**Figure S-78.** Solid-state molecular structure of  $[\text{K}(\text{C}_{222})][(\text{t}^{\text{Bu}}\text{dmx})\text{Cu}_2(\mu^2\text{-N}(\text{C}_6\text{H}_4\text{OMe}))]$  (7) with thermal ellipsoids at 35 % probability level. Hydrogen atoms and solvent molecules in the unit cell are omitted for clarity. Color scheme: Cu (cobalt blue), N (blue), K (purple) O (red).

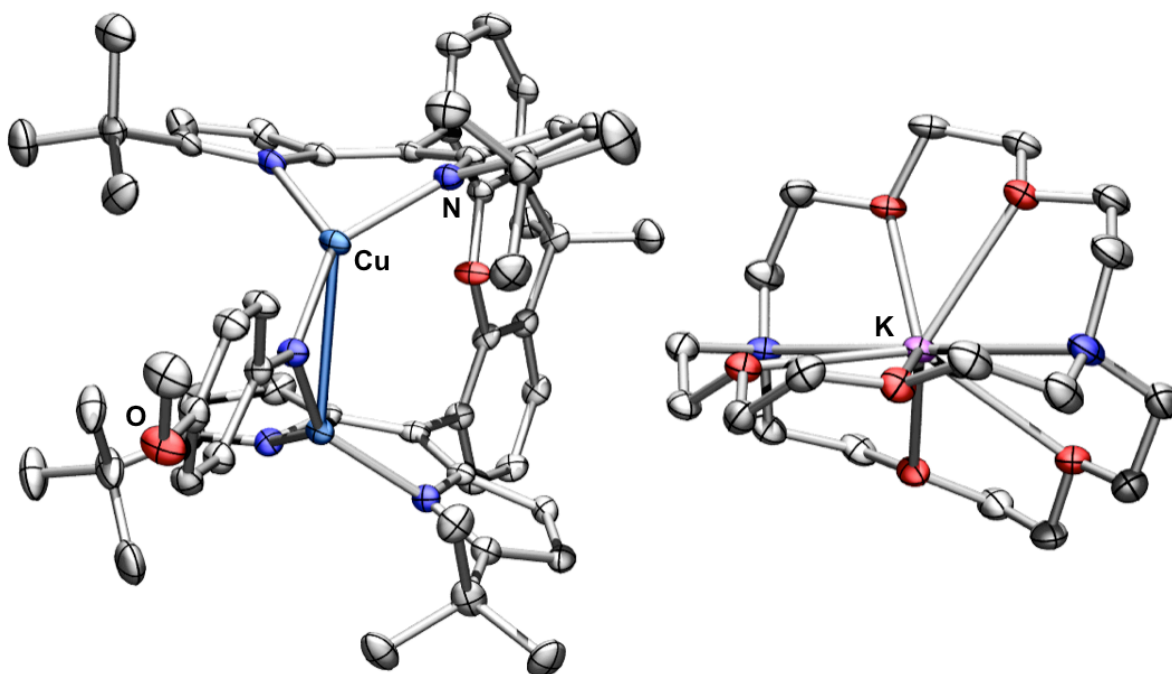

**Figure S-79.** Solid-state molecular structure of  $[\text{K}(\text{C}_{222})](^{\text{tBu}}\text{dmx})\text{Cu}_2(\mu^2\text{-N}(\text{C}_6\text{H}_4\text{OMe}))$  (**8**) with thermal ellipsoids at 50% probability level. Hydrogen atoms, disorder, and solvent molecules in the unit cell are omitted for clarity. Color scheme: Cu (cobalt blue), K (purple), N (blue), O (red).

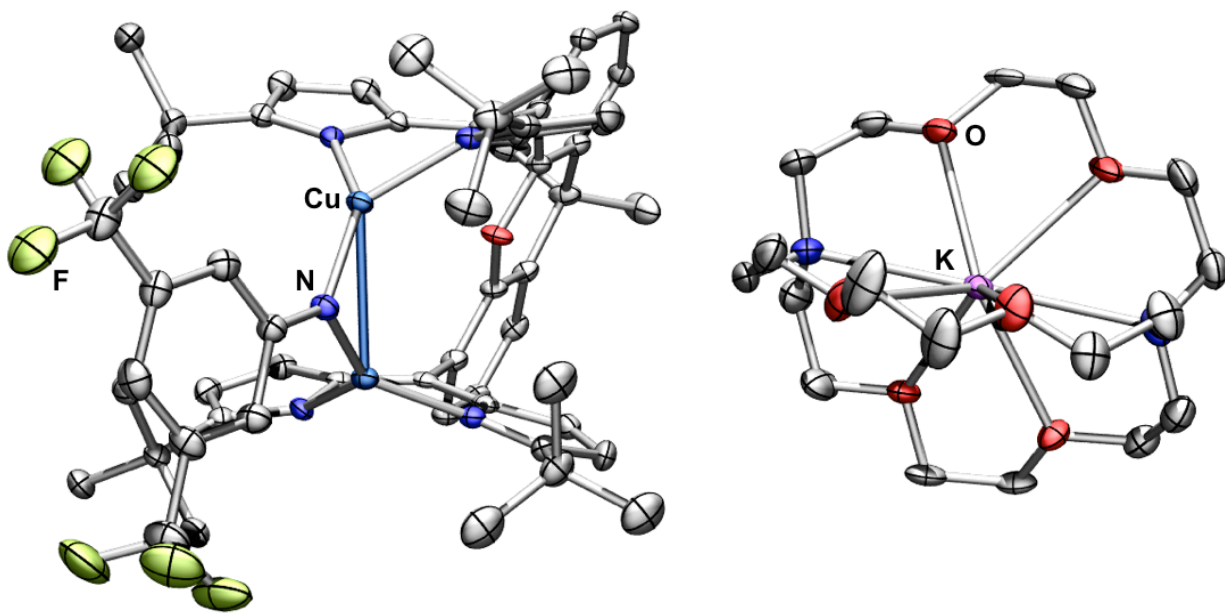

**Figure S–80.** Solid-state molecular structure of  $[\text{K}(\text{C}_{222})](^t\text{Bu-dmx})\text{Cu}_2(\mu^2\text{-N}(3,5\text{-}(\text{F}_3\text{C})_2\text{C}_6\text{H}_3))]$  (**9**) with thermal ellipsoids at 50% probability level. Hydrogen atoms, disorder, and solvent molecules in the unit cell are omitted for clarity. Color scheme: Cu (cobalt blue), F (yellow-green), K (purple), N (blue), O (red).

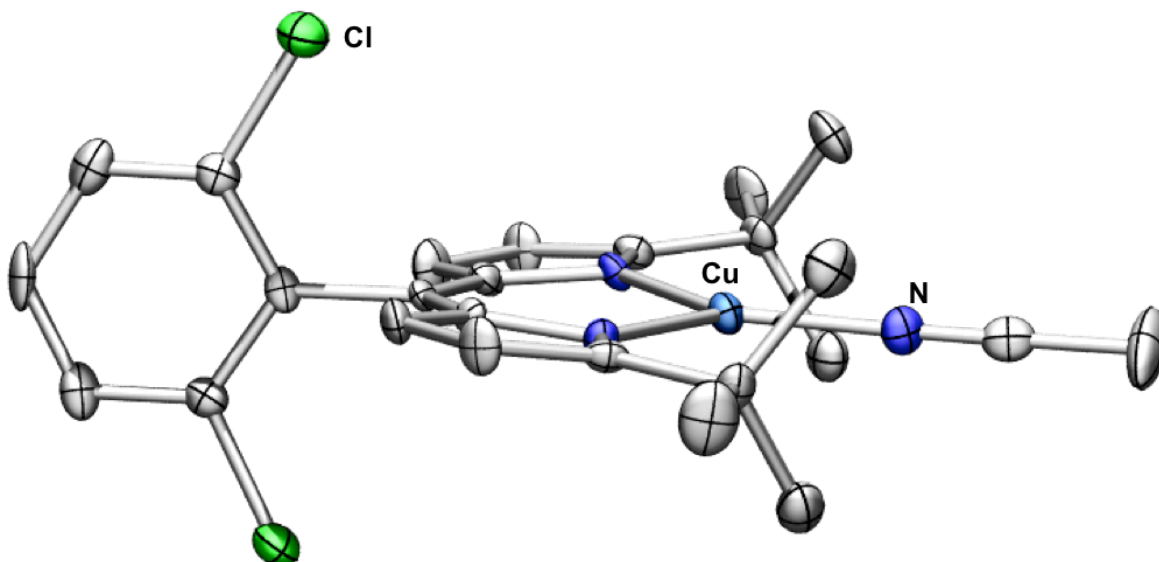

**Figure S–81.** Solid-state molecular structure of  $(t\text{BuL})\text{Cu}(\text{NCMe})$  (**10**) with thermal ellipsoids at 50 % probability level. Hydrogen atoms and solvent molecules are omitted for clarity. Color scheme: Cu (cobalt blue), Cl (green), N (blue).

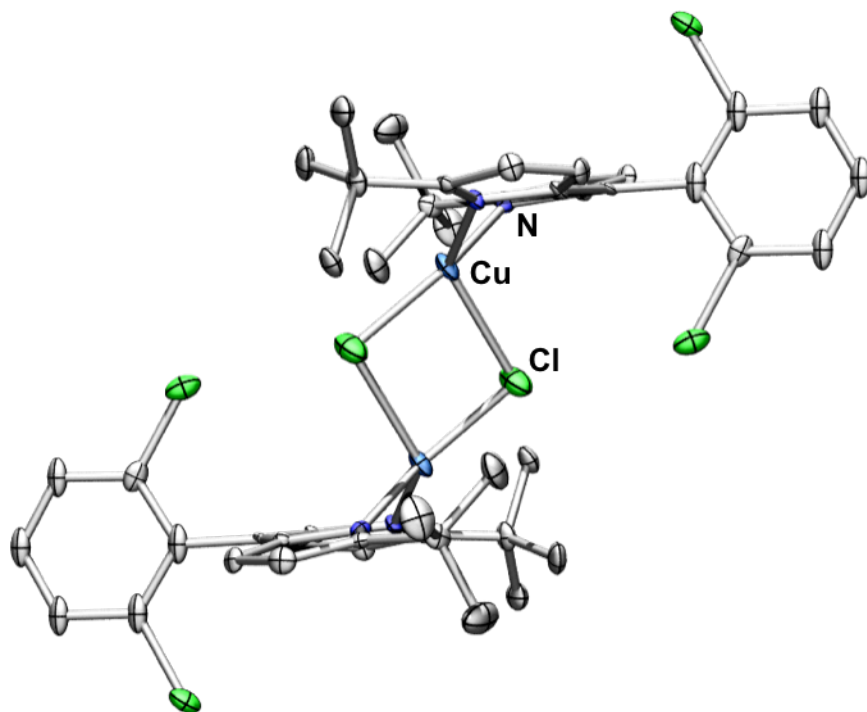

**Figure S-82.** Solid-state molecular structure of  $[(t\text{Bu}L)\text{CuCl}]_2$  (**11**) with thermal ellipsoids at 50 % probability level. Hydrogen atoms and solvent molecules are omitted for clarity. Color scheme: Cu (cobalt blue), Cl (green), N (blue).



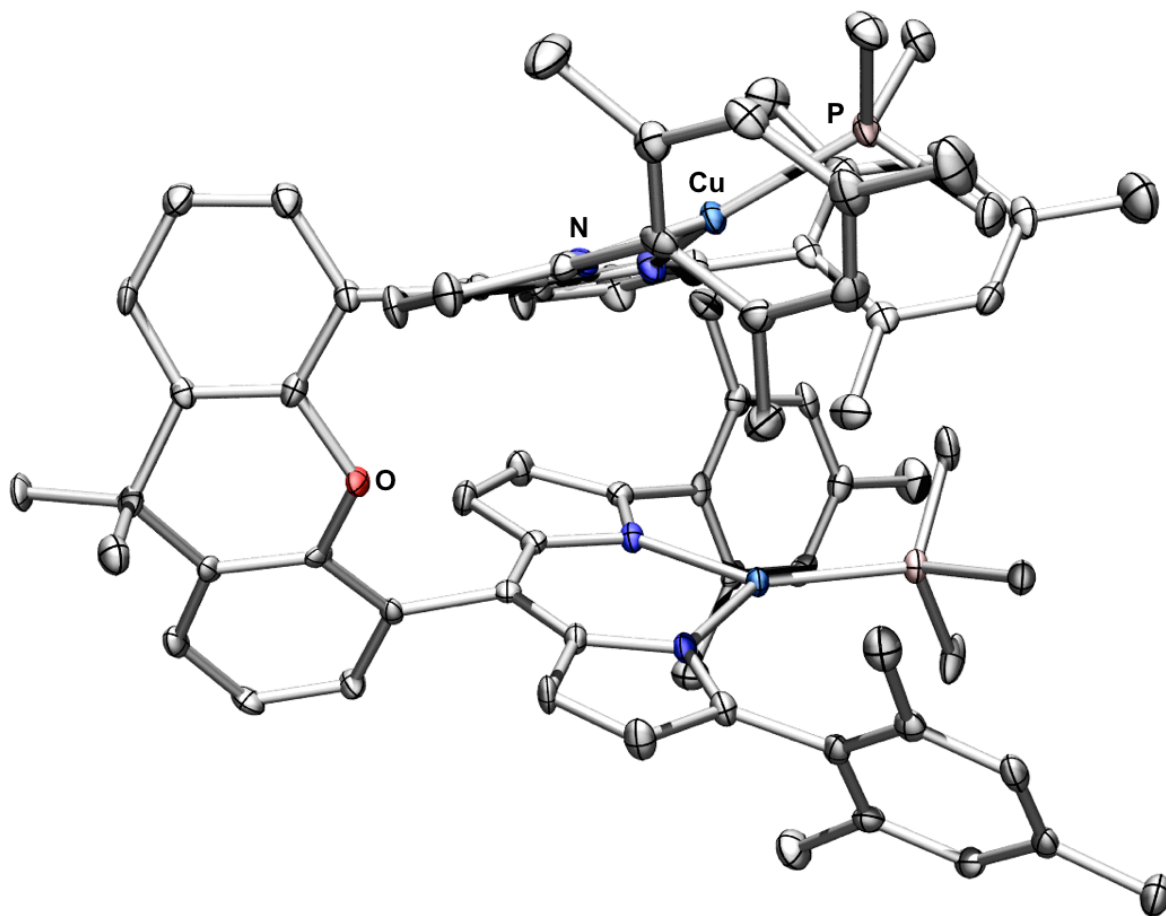

**Figure S–83.** Solid-state molecular structure of  $(^{\text{Mes}}\text{dmx})\text{Cu}_2(\text{PMe}_3)_2$  (**12**) with thermal ellipsoids at 50 % probability level. Hydrogen atoms and solvent molecules are omitted for clarity. Color scheme: Cu (cobalt blue), N (blue), O (red), P (pink).

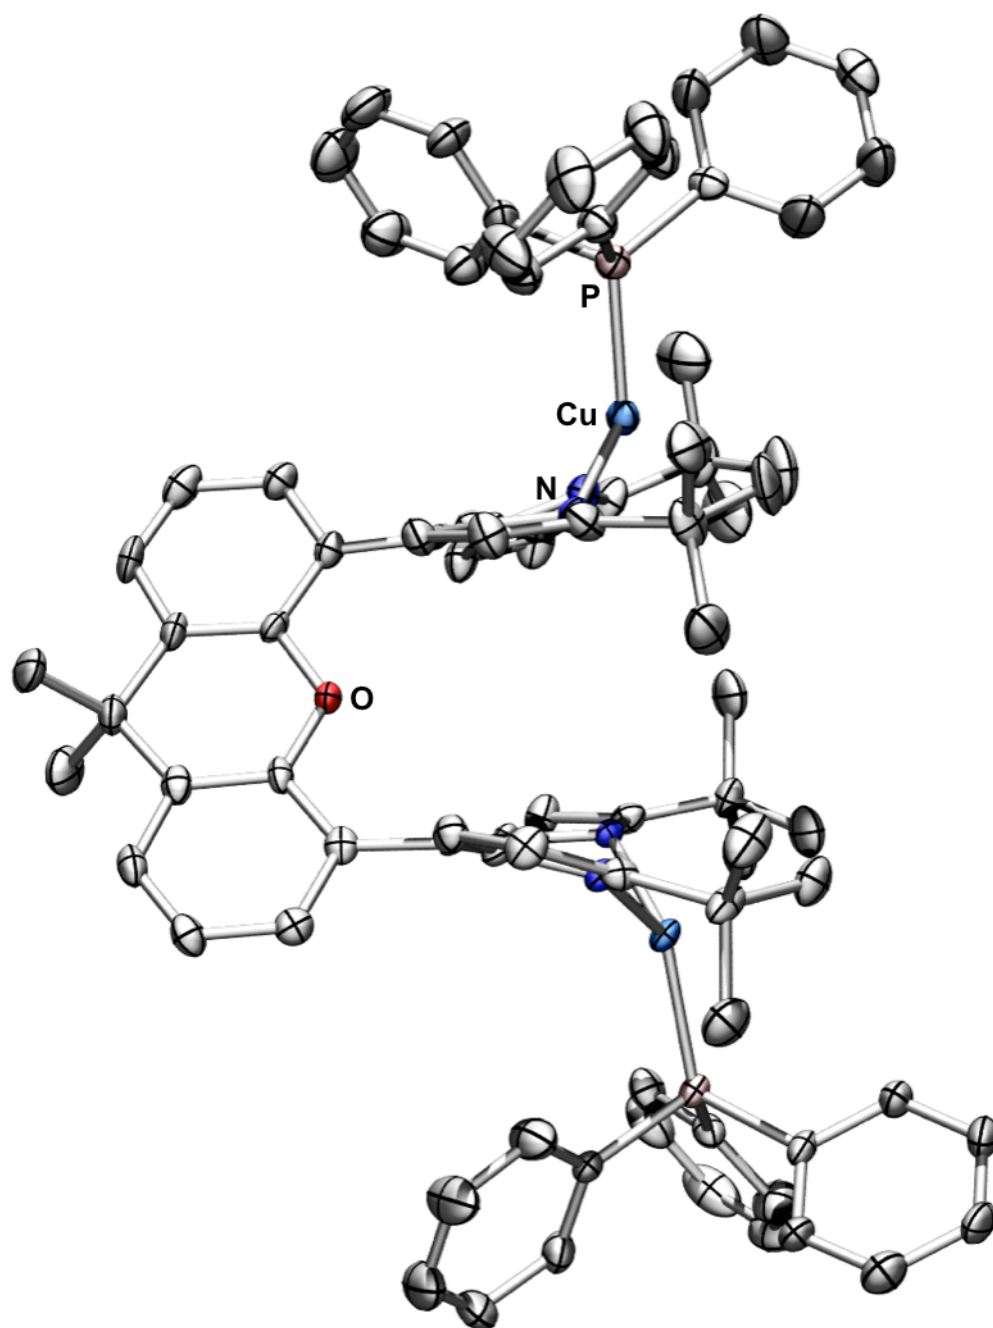

**Figure S–84.** Solid-state molecular structure of  $(t^{\text{Bu}}\text{dmx})\text{Cu}_2(\text{PPh}_3)_2$  (**13**) with thermal ellipsoids at 50 % probability level. Hydrogen atoms and solvent molecules are omitted for clarity. Color scheme: Cu (cobalt blue), N (blue), O (red), P (pink).

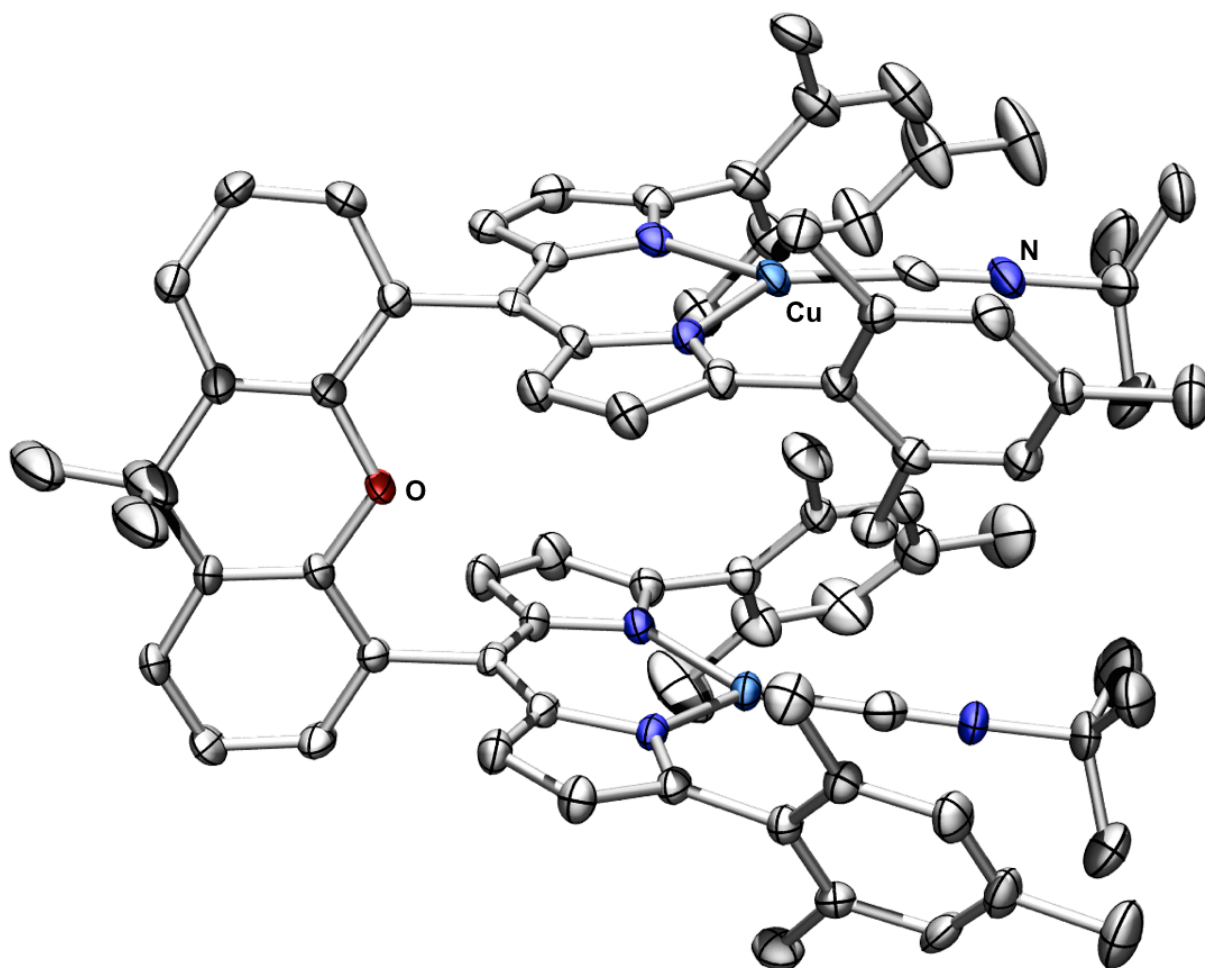

**Figure S–85.** Solid-state molecular structure of  $(\text{Mesdmx})\text{Cu}_2(\text{CN}^t\text{Bu})_2$  (**14**) with thermal ellipsoids at 50 % probability level. Hydrogen atoms and solvent molecules are omitted for clarity. Color scheme: Cu (cobalt blue), N (blue), O (red).

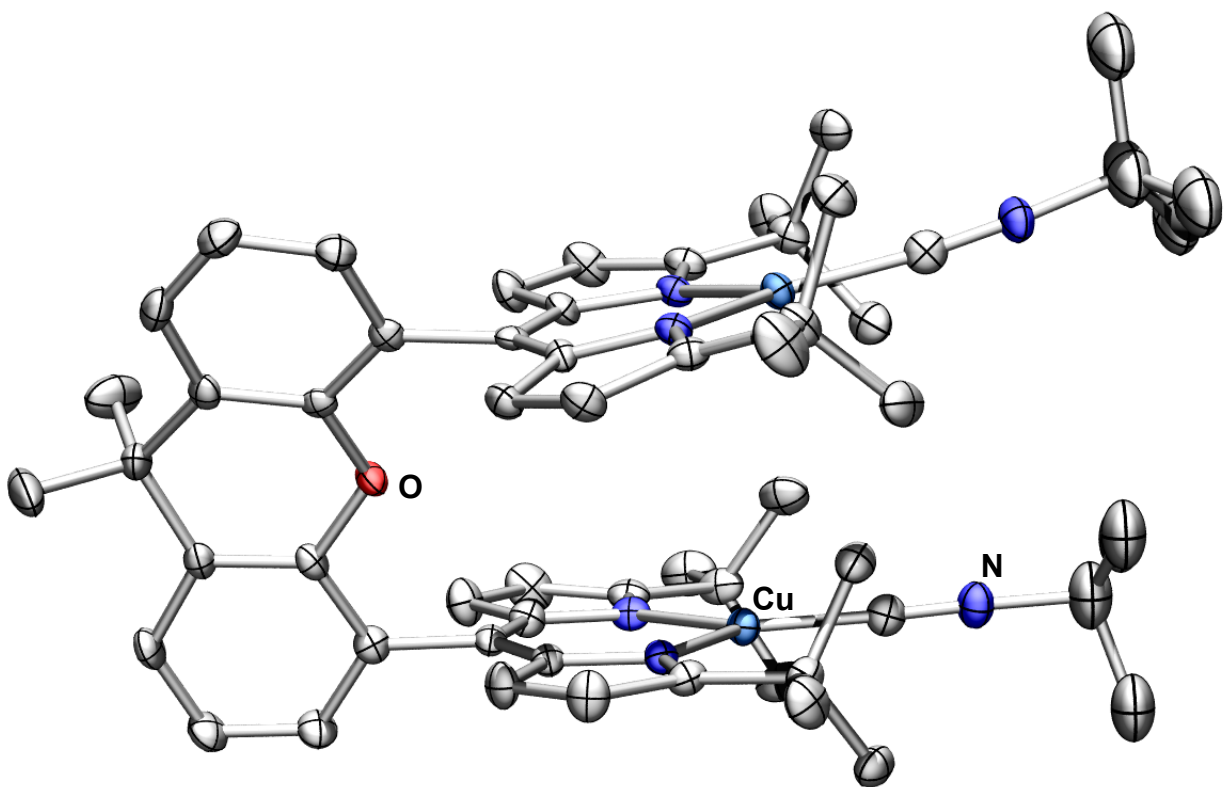

**Figure S–86.** Solid-state molecular structure of  $(t\text{Bu dmx})\text{Cu}_2(\text{CN}^t\text{Bu})_2$  (**15**) with thermal ellipsoids at 50 % probability level. Hydrogen atoms and solvent molecules are omitted for clarity. Color scheme: Cu (cobalt blue), N (blue), O (red).

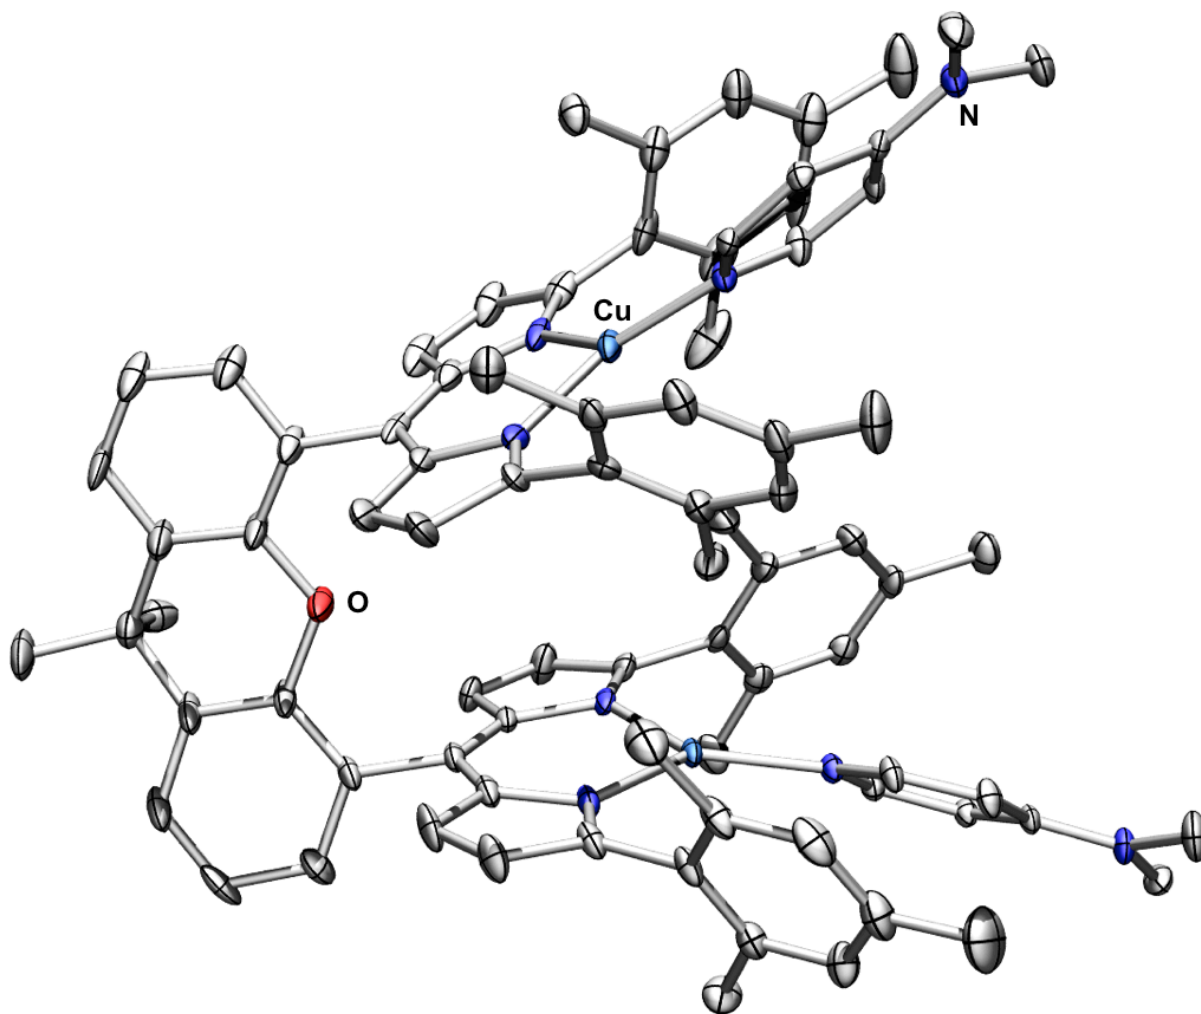

**Figure S-87.** Solid-state molecular structure of  $(^{\text{Mes}}\text{dmx})\text{Cu}_2(\text{CN}^t\text{Bu})_2$  (**16**) with thermal ellipsoids at 50 % probability level. Hydrogen atoms and solvent molecules are omitted for clarity. Color scheme: Cu (cobalt blue), N (blue), O (red).

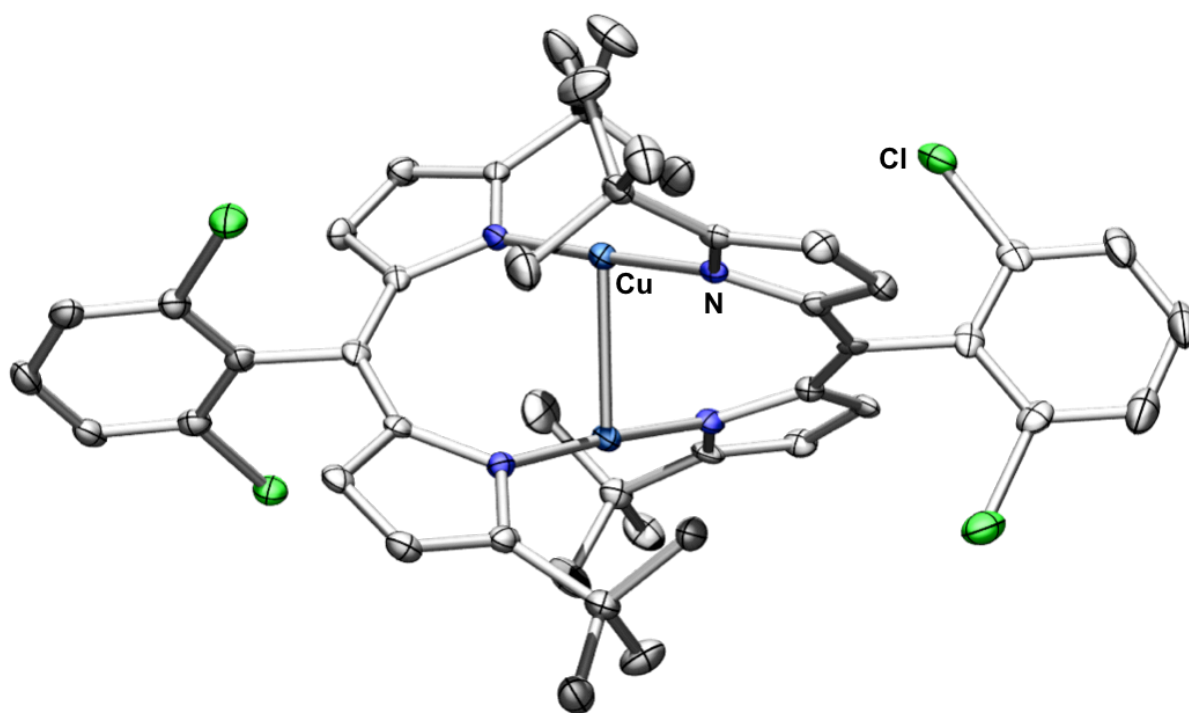

**Figure S–88.** Solid-state molecular structure of  $[(tBuL)Cu]_2$  (**18**) with thermal ellipsoids at 50 % probability level. Hydrogen atoms and solvent molecules are omitted for clarity. Color scheme: Cu (cobalt blue), Cl (green), N (blue).

**Table S–3.** Selected Bond Parameters for (<sup>Mes</sup>dmx)Cu<sub>2</sub>(NCMe)<sub>2</sub> (**1**).

|                               |            |                               |            |
|-------------------------------|------------|-------------------------------|------------|
| Cu1–N <sub>dipyrrin</sub>     | 1.938(3) Å | Cu2–N <sub>dipyrrin</sub>     | 1.931(3) Å |
| Cu1–N <sub>dipyrrin</sub>     | 1.991(3) Å | Cu2–N <sub>dipyrrin</sub>     | 2.002(3) Å |
| Cu1–N <sub>acetonitrile</sub> | 1.869(3) Å | Cu2–N <sub>acetonitrile</sub> | 1.869(3) Å |

**Table S–4.** Selected Bond Parameters for (<sup>Mes</sup>dmx)Cu<sub>2</sub>(μ<sup>2</sup>–N(C<sub>6</sub>H<sub>4</sub>OMe)) (**2**).

|                           |            |                                    |            |
|---------------------------|------------|------------------------------------|------------|
| Cu1–N <sub>dipyrrin</sub> | 1.949(4) Å | Cu2–N <sub>dipyrrin</sub>          | 1.925(4) Å |
| Cu1–N <sub>dipyrrin</sub> | 1.930(4) Å | Cu2–N <sub>dipyrrin</sub>          | 1.962(3) Å |
| Cu1–N <sub>Ar</sub>       | 1.822(4) Å | Cu2–N <sub>Ar</sub>                | 1.802(3) Å |
| Cu1–Cu2                   | 2.822(1) Å | N <sub>Ar</sub> –C <sub>ipso</sub> | 1.375(6) Å |

**Table S–5.** Selected Bond Parameters for (<sup>Mes</sup>dmx)Cu<sub>2</sub>(μ<sup>2</sup>–N(3,5-(F<sub>3</sub>C)<sub>2</sub>C<sub>6</sub>H<sub>3</sub>)) (**3**).<sup>†</sup>

|                                    |            |
|------------------------------------|------------|
| Cu–N <sub>dipyrrin</sub>           | 1.923(2) Å |
| Cu–N <sub>dipyrrin</sub>           | 1.937(2) Å |
| Cu–N <sub>Ar</sub>                 | 1.814(4) Å |
| Cu–Cu                              | 2.844(1) Å |
| N <sub>Ar</sub> –C <sub>ipso</sub> | 1.406(4) Å |

<sup>†</sup>Cu1 and Cu2 are symmetry-equivalent.

**Table S–6.** Selected Bond Parameters for (<sup>tBu</sup>dmx)Cu<sub>2</sub>(μ<sup>2</sup>–N(C<sub>6</sub>H<sub>4</sub>OMe)) (**5**).<sup>†</sup>

|                           |                      |                                    |                        |
|---------------------------|----------------------|------------------------------------|------------------------|
| Cu1–N <sub>dipyrrin</sub> | 1.977(6), 1.935(7) Å | Cu2–N <sub>dipyrrin</sub>          | 1.942(7), 1.976(7) Å   |
| Cu1–N <sub>dipyrrin</sub> | 1.929(7), 1.956(7) Å | Cu2–N <sub>dipyrrin</sub>          | 1.968(7), 1.950(6) Å   |
| Cu1–N <sub>Ar</sub>       | 1.821(7), 1.807(7) Å | Cu2–N <sub>Ar</sub>                | 1.822(7), 1.813(7) Å   |
| Cu1–Cu2                   | 2.856(1), 2.837(1) Å | N <sub>Ar</sub> –C <sub>ipso</sub> | 1.390(10), 1.383(10) Å |

<sup>†</sup>Two inequivalent copper-containing molecules are present in the asymmetric unit.

**Table S–7.** Selected Bond Parameters for (<sup>t</sup>Bu<sub>2</sub>dmx)Cu<sub>2</sub>(μ<sup>2</sup>-N(3,5-(F<sub>3</sub>C)<sub>2</sub>C<sub>6</sub>H<sub>3</sub>)) (6).<sup>†</sup>

|                           |                      |                                    |                        |
|---------------------------|----------------------|------------------------------------|------------------------|
| Cu1–N <sub>dipyrrin</sub> | 1.932(7), 1.929(7) Å | Cu2–N <sub>dipyrrin</sub>          | 1.927(8), 1.963(7) Å   |
| Cu1–N <sub>dipyrrin</sub> | 1.931(7), 1.934(8) Å | Cu2–N <sub>dipyrrin</sub>          | 1.931(8), 1.957(8) Å   |
| Cu1–N <sub>Ar</sub>       | 1.812(7), 1.818(7) Å | Cu2–N <sub>Ar</sub>                | 1.830(8), 1.827(8) Å   |
| Cu1–Cu2                   | 2.884(2), 2.875(2) Å | N <sub>Ar</sub> –C <sub>ipso</sub> | 1.392(12), 1.386(12) Å |

<sup>†</sup>Two inequivalent copper-containing molecules are present in the asymmetric unit.

**Table S–8.** Selected Bond Parameters for [K(C<sub>222</sub>)][(<sup>Mes</sup>dmx)Cu<sub>2</sub>(μ<sup>2</sup>-N(C<sub>6</sub>H<sub>4</sub>OMe))] (7).

|                                       |             |                                       |            |
|---------------------------------------|-------------|---------------------------------------|------------|
| Cu1–N <sub>dipyrrin</sub>             | 1.958(2) Å  | Cu2–N <sub>dipyrrin</sub>             | 1.972(3) Å |
| Cu1–N <sub>dipyrrin</sub>             | 2.058(3) Å  | Cu2–N <sub>dipyrrin</sub>             | 2.039(3) Å |
| Cu1–N <sub>Ar</sub>                   | 1.852(3) Å  | Cu2–N <sub>Ar</sub>                   | 1.848(3) Å |
| Cu1–Cu2                               | 2.9031(7) Å | N <sub>Ar</sub> –C <sub>ipso</sub>    | 1.318(5) Å |
| C <sub>ipso</sub> –C <sub>ortho</sub> | 1.428(5) Å  | C <sub>ipso</sub> –C <sub>ortho</sub> | 1.438(5) Å |

**Table S–9.** Selected Bond Parameters for [K(C<sub>222</sub>)][(<sup>t</sup>Bu<sub>2</sub>dmx)Cu<sub>2</sub>(μ<sup>2</sup>-N(C<sub>6</sub>H<sub>4</sub>OMe))] (8).

|                                       |             |                                       |            |
|---------------------------------------|-------------|---------------------------------------|------------|
| Cu1–N <sub>dipyrrin</sub>             | 2.028(2) Å  | Cu2–N <sub>dipyrrin</sub>             | 2.068(2) Å |
| Cu1–N <sub>dipyrrin</sub>             | 2.005(2) Å  | Cu2–N <sub>dipyrrin</sub>             | 1.985(2) Å |
| Cu1–N <sub>Ar</sub>                   | 1.860(2) Å  | Cu2–N <sub>Ar</sub>                   | 1.869(2) Å |
| Cu1–Cu2                               | 2.9558(7) Å | N <sub>Ar</sub> –C <sub>ipso</sub>    | 1.351(3) Å |
| C <sub>ipso</sub> –C <sub>ortho</sub> | 1.438(4) Å  | C <sub>ipso</sub> –C <sub>ortho</sub> | 1.417(3) Å |

**Table S–10.** Selected Bond Parameters for [K(C<sub>222</sub>)][(<sup>t</sup>Bu<sub>2</sub>dmx)Cu<sub>2</sub>(μ<sup>2</sup>-N(3,5-(F<sub>3</sub>C)<sub>2</sub>C<sub>6</sub>H<sub>3</sub>))] (9).

|                                       |             |                                       |            |
|---------------------------------------|-------------|---------------------------------------|------------|
| Cu1–N <sub>dipyrrin</sub>             | 2.006(2) Å  | Cu2–N <sub>dipyrrin</sub>             | 1.973(2) Å |
| Cu1–N <sub>dipyrrin</sub>             | 1.999(2) Å  | Cu2–N <sub>dipyrrin</sub>             | 2.043(2) Å |
| Cu1–N <sub>Ar</sub>                   | 1.853(2) Å  | Cu2–N <sub>Ar</sub>                   | 1.860(2) Å |
| Cu1–Cu2                               | 2.8401(5) Å | N <sub>Ar</sub> –C <sub>ipso</sub>    | 1.342(3) Å |
| C <sub>ipso</sub> –C <sub>ortho</sub> | 1.435(4) Å  | C <sub>ipso</sub> –C <sub>ortho</sub> | 1.420(4) Å |



**Table S–11.** Selected Bond Parameters for (<sup>t</sup>BuL)Cu(NCMe) (**10**).

|                          |            |
|--------------------------|------------|
| Cu–N <sub>dipyrrin</sub> | 1.968(4) Å |
| Cu–N <sub>dipyrrin</sub> | 1.965(4) Å |
| Cu–N <sub>Ar</sub>       | 1.881(4) Å |

**Table S–12.** Selected Bond Parameters for [(<sup>t</sup>BuL)CuCl]<sub>2</sub> (**11**).<sup>†</sup>

|                          |            |
|--------------------------|------------|
| Cu–N <sub>dipyrrin</sub> | 1.920(3) Å |
| Cu–N <sub>dipyrrin</sub> | 1.971(3) Å |
| Cu–Cl                    | 2.222(2) Å |

<sup>†</sup>Cu1 and Cu2 within the dimer are symmetry-equivalent.

**Table S–13.** Selected Bond Parameters for (<sup>Mes</sup>dmx)Cu<sub>2</sub>(PMe<sub>3</sub>)<sub>2</sub> (**12**).

|                           |            |                           |            |
|---------------------------|------------|---------------------------|------------|
| Cu1–N <sub>dipyrrin</sub> | 1.984(3) Å | Cu2–N <sub>dipyrrin</sub> | 1.985(4) Å |
| Cu1–N <sub>dipyrrin</sub> | 1.979(4) Å | Cu2–N <sub>dipyrrin</sub> | 1.981(3) Å |
| Cu1–P                     | 2.160(2) Å | Cu2–P                     | 2.169(2) Å |

**Table S–14.** Selected Bond Parameters for (<sup>t</sup>Budmx)Cu<sub>2</sub>(PPh<sub>3</sub>)<sub>2</sub> (**13**).<sup>†</sup>

|                           |                      |                           |                      |
|---------------------------|----------------------|---------------------------|----------------------|
| Cu1–N <sub>dipyrrin</sub> | 1.943(6), 2.004(5) Å | Cu2–N <sub>dipyrrin</sub> | 1.998(4), 1.953(4) Å |
| Cu1–N <sub>dipyrrin</sub> | 1.992(4), 1.949(4) Å | Cu2–N <sub>dipyrrin</sub> | 1.963(5), 1.988(4) Å |
| Cu1–P                     | 2.149(2), 2.151(2) Å | Cu2–P                     | 2.156(2), 2.153(2) Å |

<sup>†</sup>Two inequivalent copper-containing molecules are present in the asymmetric unit.

**Table S–15.** Selected Bond Parameters for (<sup>Mes</sup>dmx)Cu<sub>2</sub>(CN<sup>t</sup>Bu)<sub>2</sub> (**14**).

|                           |            |                           |            |
|---------------------------|------------|---------------------------|------------|
| Cu1–N <sub>dipyrrin</sub> | 1.965(4) Å | Cu2–N <sub>dipyrrin</sub> | 1.954(4) Å |
| Cu1–N <sub>dipyrrin</sub> | 1.955(3) Å | Cu2–N <sub>dipyrrin</sub> | 1.959(3) Å |
| Cu1–CN <sup>t</sup> Bu    | 1.819(5) Å | Cu2–CN <sup>t</sup> Bu    | 1.820(4) Å |

**Table S–16.** Selected Bond Parameters for (<sup>t</sup>Bu<sub>2</sub>dmx)Cu<sub>2</sub>(CN<sup>t</sup>Bu)<sub>2</sub> (**15**).

|                           |            |                           |            |
|---------------------------|------------|---------------------------|------------|
| Cu1–N <sub>dipyrrin</sub> | 1.978(2) Å | Cu2–N <sub>dipyrrin</sub> | 1.967(2) Å |
| Cu1–N <sub>dipyrrin</sub> | 1.960(2) Å | Cu2–N <sub>dipyrrin</sub> | 1.968(2) Å |
| Cu1–CN <sup>t</sup> Bu    | 1.833(3) Å | Cu2–CN <sup>t</sup> Bu    | 1.837(3) Å |

**Table S–17.** Selected Bond Parameters for (<sup>t</sup>Bu<sub>2</sub>dmx)Cu<sub>2</sub>(dmap)<sub>2</sub> (**16**).

|                           |            |                           |            |
|---------------------------|------------|---------------------------|------------|
| Cu1–N <sub>dipyrrin</sub> | 1.983(4) Å | Cu2–N <sub>dipyrrin</sub> | 1.981(5) Å |
| Cu1–N <sub>dipyrrin</sub> | 2.005(4) Å | Cu2–N <sub>dipyrrin</sub> | 1.968(2) Å |
| Cu1–N <sub>DMAP</sub>     | 1.955(4) Å | Cu2–N <sub>DMAP</sub>     | 1.948(4) Å |

**Table S–18.** Selected Bond Parameters for [<sup>t</sup>Bu<sub>2</sub>LCu]<sub>2</sub> (**18**).

|                           |            |                           |            |
|---------------------------|------------|---------------------------|------------|
| Cu1–N <sub>dipyrrin</sub> | 1.862(2) Å | Cu2–N <sub>dipyrrin</sub> | 1.859(2) Å |
| Cu1–N <sub>dipyrrin</sub> | 1.867(2) Å | Cu2–N <sub>dipyrrin</sub> | 1.862(2) Å |
| Cu1–Cu2                   |            |                           | 2.443(2) Å |

## DFT Calculations.

Density Functional Theory (DFT) calculations were performed with version 4.002 of the ORCA software package.<sup>28</sup> Cu K-edge, N K-edge XAS spectra were calculated using TDDFT. All spectra were calculated from crystallographic coordinates. Single-point energies were calculated by using the B3LYP functional.<sup>29</sup> The CP(PPP) basis set was used for Cu with a special integration accuracy (ORCA Grid7).<sup>30</sup> The scalar relativistically recontracted ZORA-def2-TZVP(-f) basis set<sup>31</sup> with ORCA Grid4 was used for all other atoms. Calculations included the zeroth-order regular approximation (ZORA)<sup>32</sup> for relativistic effects as implemented by van Wüllen.<sup>33</sup> Solvation was modeled with CPCM in an infinite dielectric.<sup>34</sup> A broken symmetry surface was used to optimize the neutral imidos [(BS) (1,1)] structures that converged as antiferromagnetically-coupled configurations. Here, the broken symmetry notation BS( $m,n$ ) denotes a system with ( $m+n$ ) unpaired electrons and a net spin of  $\frac{(m+n)}{2}$  if antiferromagnetically coupled. In particular, one fragment bears  $m$   $\alpha$ -spin electrons while the second fragment bears  $n$   $\beta$ -spin electrons.

Multireference character in the ground state of **5** and **6** was investigated using SORCI calculations. SORCI was performed on a complete active space (CAS) for a truncated models of **5** and **6** comprising 10 electrons and 9 orbitals [CAS(10,9)]. A total of 5 singlet and 5 triplet states were calculated. Sufficiency of the active space was evaluated by ensuring that it captured ca. 90% of chosen state references without requiring holes or particles outside the active orbitals. The ZORA-def2-TZVP(-f) basis set<sup>31</sup> was used on Cu and N, and ZORA-def2-SVP was used on all other atoms. The ZORA relativistic correction<sup>32</sup> was used in all SORCI calculations. As described elsewhere,<sup>35</sup> individual selection was used to ease the computational burden. The size of the first-order interacting space was reduced with a threshold:  $T_{sel} = 10^{-6}$  E<sub>h</sub>. A further approximation involved reducing the reference space through another selection: all initial references that contributed less than a second threshold ( $T_{pre} = 10^{-5}$ ) to the zeroth-order states were rejected from the reference space. Starting orbitals were taken from unrestricted Kohn–Sham orbitals generated via B3LYP calculations using the aforementioned basis sets that were subsequently transformed to quasi-restricted orbitals (QROs).<sup>36</sup> These orbitals were then used in a CASSCF calculation, whereupon the resulting orbitals were used in the SORCI procedure.

## EXAMPLE ORCA INPUT FILES

### Geometry Optimization Calculation:

```
!UKS BP86 ZORA-def2-TZVP(-f) def2/J CPCM ZORA  
!NormalPrint TightSCF Grid4 NoFinalGrid Opt PAL8 NumFreq
```

```
%scf Directresetfreq 1  
  DIIS MaxEq 15  
  end  
  Shift Shift 0.5  
  Erroff 0.1  
  end  
  MaxIter 500  
  end
```

```
%maxcore 4000
```

```
* xyz Charge SpinMultiplicity  
Coordinates  
*
```

### Single Point and TD-DFT XAS Calculations:

```
!WB97X RIJCOSX ZORA-def2-TZVP(-f) def2/J ZORA CPCM UKS PAL4  
!NormalPrint TightSCF Grid4 NoFinalGrid UNO UCO
```

```
%basis newgto 3d Metal Atom "CP(PPP)"  
  end
```

```
%tddft NRoots 100  
  MaxDim 1000  
  OrbWin[0] = LowestEnergyDonorOrbital, HighestEnergyDonorOrbital, -1, -1  
  OrbWin[1] = LowestEnergyDonorOrbital, HighestEnergyDonorOrbital, -1, -1  
  DoQuad true  
  end
```

```
%method SpecialGridAtoms Metal Atomic Number  
  SpecialGridIntAcc 7  
  end
```

```
%MaxCore 4000
```

```
%SCF  
  MaxIter 500  
  end
```

\* xyz *Charge SpinMultiplicity*  
*Coordinates*  
\*

**DFT-ROCIS XAS Calculation:**

!B3LYP RIJCOSX ZORA-def2-TZVP(-f) def2/J ZORA CPCM ROKS PAL4  
!NormalPrint TightSCF Grid4 NoFinalGrid UNO UCO MOREAD NOITER

%moinp "*TD-DFT FILENAME.qro*"

%basis newgto *3d Metal Atom* "CP(PPP)" end  
end

%rocis NRoots 100  
MaxDim 500  
SOC false  
DoRI true  
DoQuad true  
DoHigherMult false  
DoLowerMult false  
PrintLevel 3  
Orbwin *LowestEnergyDonorOrbital, HighestEnergyDonorOrbital*,0,500  
DoDFTCIS true  
DFTCIS\_c = 0.21, 0.49, 0.29  
end

%method SpecialGridAtoms *Metal Atomic Number*  
SpecialGridIntAcc 7  
end

%MaxCore 4000

\* xyz *Charge SpinMultiplicity*  
*Coordinates*

## INPUT COORDINATES FOR ORCA CALCULATIONS

(<sup>t</sup>BuL)Cu<sup>I</sup>(NCMe)

Charge = 0, Spin Multiplicity = 1

|    |          |          |          |
|----|----------|----------|----------|
| Cu | 0.00000  | 0.00000  | 0.00000  |
| Cl | 3.84033  | 3.46400  | -1.48748 |
| Cl | 2.99207  | 2.39616  | 3.75947  |
| N  | 1.85221  | -0.37004 | 0.55401  |
| N  | 0.00000  | 1.96619  | 0.00000  |
| N  | -1.37184 | -1.23150 | -0.38056 |
| C  | 2.71763  | 0.72222  | 0.75992  |
| C  | 2.61554  | -1.48035 | 0.64484  |
| C  | 3.97114  | -1.13952 | 0.88587  |
| H  | 4.69871  | -1.74445 | 0.97496  |
| C  | 3.43196  | 3.02992  | 1.16354  |
| C  | 2.35447  | 2.06156  | 0.78107  |
| C  | 1.12164  | 2.65034  | 0.48093  |
| C  | -0.94603 | 2.91260  | -0.19784 |
| C  | 5.35877  | 4.94770  | 1.86630  |
| H  | 5.98931  | 5.61503  | 2.10806  |
| C  | -2.12339 | -2.02783 | -0.63271 |
| C  | 4.72823  | 4.21424  | 2.84584  |
| H  | 4.94604  | 4.35378  | 3.75943  |
| C  | 3.78271  | 3.28164  | 2.49935  |
| C  | 4.03338  | 0.21600  | 0.96468  |
| H  | 4.81289  | 0.73186  | 1.12904  |
| C  | 0.81634  | 4.02243  | 0.60236  |
| H  | 1.39543  | 4.70513  | 0.92323  |
| C  | -2.31374 | 2.58794  | -0.76006 |
| C  | 5.07837  | 4.71428  | 0.53225  |
| H  | 5.52736  | 5.20215  | -0.14732 |
| C  | 2.05880  | -2.88144 | 0.51397  |
| C  | 4.14054  | 3.76362  | 0.20367  |
| C  | -0.46341 | 4.18638  | 0.17376  |
| H  | -0.94412 | 5.00668  | 0.13171  |
| C  | -3.06798 | 3.88046  | -1.09942 |
| H  | -3.20055 | 4.40545  | -0.28195 |
| H  | -3.93897 | 3.65718  | -1.48815 |
| H  | -2.54699 | 4.40441  | -1.74271 |
| C  | -3.12371 | 1.79984  | 0.28516  |
| H  | -2.67073 | 0.95024  | 0.47701  |
| H  | -4.02073 | 1.62079  | -0.06466 |
| H  | -3.19371 | 2.32741  | 1.10787  |
| C  | -2.17447 | 1.75968  | -2.05428 |
| H  | -1.69648 | 2.28409  | -2.72875 |

|   |          |          |          |
|---|----------|----------|----------|
| H | -3.06533 | 1.52951  | -2.39110 |
| H | -1.67345 | 0.94047  | -1.86491 |
| C | 3.15562  | -3.91439 | 0.79594  |
| H | 3.89380  | -3.78597 | 0.16391  |
| H | 2.78923  | -4.81717 | 0.69313  |
| H | 3.48518  | -3.79832 | 1.71166  |
| C | 0.91902  | -3.10379 | 1.52595  |
| H | 1.27220  | -3.03206 | 2.43767  |
| H | 0.53527  | -3.99799 | 1.39588  |
| H | 0.22373  | -2.42777 | 1.38923  |
| C | 1.53169  | -3.12373 | -0.91532 |
| H | 0.87364  | -2.43545 | -1.14116 |
| H | 1.10811  | -4.00656 | -0.96185 |
| H | 2.27693  | -3.08339 | -1.55049 |
| C | -3.08022 | -3.08182 | -0.96914 |
| H | -2.59648 | -3.91543 | -1.15420 |
| H | -3.59194 | -2.81805 | -1.76151 |
| H | -3.69225 | -3.22108 | -0.21587 |

[(<sup>t</sup>BuL)LCu<sup>II</sup>Cl]<sub>2</sub>, BS(1,1)  
Charge = 0, Spin Multiplicity = 3

|    |          |          |          |
|----|----------|----------|----------|
| Cu | 0.00000  | 0.00000  | 0.00000  |
| Cl | 3.73630  | 0.75563  | 2.28251  |
| Cl | -0.88132 | -2.02663 | 0.23579  |
| Cl | 3.54702  | 4.15336  | -1.91675 |
| N  | -0.00000 | 1.92105  | 0.00000  |
| C  | 3.73609  | 2.49541  | 0.21622  |
| C  | 2.53868  | 0.67641  | -0.94402 |
| N  | 1.44002  | -0.10015 | -1.34511 |
| C  | 2.45248  | 1.84647  | -0.19347 |
| C  | 4.39737  | 2.07509  | 1.36789  |
| C  | -0.90885 | 2.81739  | 0.43268  |
| C  | 3.70129  | 0.15860  | -1.57390 |
| H  | 4.59036  | 0.47321  | -1.46206 |
| C  | 3.30500  | -0.87418 | -2.37078 |
| H  | 3.86475  | -1.40548 | -2.92607 |
| C  | 1.26276  | 2.47809  | 0.20402  |
| C  | -3.13580 | 3.49563  | 1.32583  |
| H  | -2.94433 | 4.43600  | 1.13038  |
| H  | -2.83146 | 3.28316  | 2.23263  |
| H  | -4.10043 | 3.33654  | 1.26010  |
| C  | -0.24629 | 3.98084  | 0.88891  |
| H  | -0.65836 | 4.76839  | 1.22447  |
| C  | 1.89522  | -1.00886 | -2.22082 |
| C  | 1.04188  | -1.99101 | -3.00891 |
| C  | 1.10609  | -3.37215 | -2.32921 |
| H  | 0.75196  | -3.30440 | -1.41740 |
| H  | 2.03676  | -3.67705 | -2.29535 |
| H  | 0.57118  | -4.01338 | -2.83979 |
| C  | -0.38946 | -1.51071 | -3.15757 |
| H  | -0.39453 | -0.62255 | -3.57027 |
| H  | -0.81116 | -1.46236 | -2.27465 |
| H  | -0.88718 | -2.13759 | -3.72236 |
| C  | -2.40092 | 2.60371  | 0.31950  |
| C  | 4.31984  | 3.53791  | -0.49559 |
| C  | 1.10917  | 3.75921  | 0.75803  |
| H  | 1.80550  | 4.35980  | 0.99790  |
| C  | 5.52631  | 4.12497  | -0.07877 |
| H  | 5.92421  | 4.82113  | -0.58822 |
| C  | 1.62931  | -2.13212 | -4.42310 |
| H  | 2.53272  | -2.50691 | -4.36546 |
| H  | 1.66833  | -1.25036 | -4.85015 |
| H  | 1.06218  | -2.72829 | -4.95475 |
| C  | 5.57079  | 2.66217  | 1.81515  |



|    |          |          |          |
|----|----------|----------|----------|
| H  | 5.98514  | 2.36803  | 2.61744  |
| C  | -2.82910 | 2.96581  | -1.09370 |
| H  | -2.34418 | 2.40481  | -1.73554 |
| H  | -2.62474 | 3.90852  | -1.26411 |
| H  | -3.79181 | 2.81549  | -1.19112 |
| C  | 6.12161  | 3.67864  | 1.07743  |
| H  | 6.93011  | 4.08037  | 1.37010  |
| C  | -2.80413 | 1.15960  | 0.59765  |
| H  | -2.46331 | 0.88990  | 1.47669  |
| H  | -2.42692 | 0.57596  | -0.09196 |
| H  | -3.78200 | 1.08603  | 0.58989  |
| Cu | -0.63876 | -2.01077 | 2.66183  |
| Cl | -4.37506 | -2.76639 | 0.37933  |
| Cl | 0.24256  | 0.01587  | 2.42605  |
| Cl | -4.18577 | -6.16413 | 4.57859  |
| N  | -0.63876 | -3.93181 | 2.66184  |
| C  | -4.37484 | -4.50618 | 2.44561  |
| C  | -3.17743 | -2.68717 | 3.60585  |
| N  | -2.07878 | -1.91062 | 4.00695  |
| C  | -3.09124 | -3.85722 | 2.85530  |
| C  | -5.03612 | -4.08585 | 1.29395  |
| C  | 0.27010  | -4.82815 | 2.22915  |
| C  | -4.34005 | -2.16936 | 4.23573  |
| H  | -5.22911 | -2.48398 | 4.12390  |
| C  | -3.94376 | -1.13659 | 5.03262  |
| H  | -4.50351 | -0.60529 | 5.58791  |
| C  | -1.90152 | -4.48886 | 2.45781  |
| C  | 2.49704  | -5.50640 | 1.33601  |
| H  | 2.30557  | -6.44676 | 1.53146  |
| H  | 2.19270  | -5.29392 | 0.42921  |
| H  | 3.46168  | -5.34731 | 1.40174  |
| C  | -0.39246 | -5.99159 | 1.77292  |
| H  | 0.01961  | -6.77916 | 1.43737  |
| C  | -2.53398 | -1.00191 | 4.88266  |
| C  | -1.68063 | -0.01975 | 5.67074  |
| C  | -1.74484 | 1.36138  | 4.99104  |
| H  | -1.39072 | 1.29364  | 4.07923  |
| H  | -2.67552 | 1.66628  | 4.95718  |
| H  | -1.20994 | 2.00261  | 5.50163  |
| C  | -0.24930 | -0.50006 | 5.81941  |
| H  | -0.24423 | -1.38822 | 6.23211  |
| H  | 0.17240  | -0.54841 | 4.93649  |
| H  | 0.24843  | 0.12682  | 6.38420  |
| C  | 1.76217  | -4.61448 | 2.34234  |
| C  | -4.95860 | -5.54868 | 3.15743  |
| C  | -1.74793 | -5.76997 | 1.90381  |

|   |          |          |         |
|---|----------|----------|---------|
| H | -2.44426 | -6.37057 | 1.66394 |
| C | -6.16507 | -6.13573 | 2.74060 |
| H | -6.56296 | -6.83189 | 3.25005 |
| C | -2.26806 | 0.12135  | 7.08494 |
| H | -3.17148 | 0.49616  | 7.02730 |
| H | -2.30709 | -0.76041 | 7.51199 |
| H | -1.70094 | 0.71754  | 7.61659 |
| C | -6.20955 | -4.67294 | 0.84668 |
| H | -6.62389 | -4.37880 | 0.04440 |
| C | 2.19035  | -4.97657 | 3.75553 |
| H | 1.70543  | -4.41558 | 4.39737 |
| H | 1.98598  | -5.91928 | 3.92595 |
| H | 3.15305  | -4.82626 | 3.85296 |
| C | -6.76037 | -5.68941 | 1.58441 |
| H | -7.56887 | -6.09114 | 1.29174 |
| C | 2.16538  | -3.17037 | 2.06419 |
| H | 1.82455  | -2.90067 | 1.18515 |
| H | 1.78816  | -2.58671 | 2.75380 |
| H | 3.14325  | -3.09680 | 2.07195 |

(<sup>Bu</sup>dmx)Cu<sub>2</sub>NAr<sup>CF3</sup>, BS(1,1)

Charge = 0, Spin Multiplicity = 1

|    |          |          |          |
|----|----------|----------|----------|
| Cu | 0.00000  | 0.00000  | 0.00000  |
| Cu | -0.00000 | 0.00000  | 2.88312  |
| F  | 1.66193  | -5.27107 | 4.13211  |
| F  | -0.29519 | -4.92069 | 4.87406  |
| F  | 0.16865  | -6.67472 | 3.72175  |
| F  | -2.02020 | -6.07218 | -0.86925 |
| F  | -1.23383 | -4.48595 | -2.01886 |
| F  | 0.00452  | -6.11484 | -1.35161 |
| O  | -0.31231 | 4.68554  | 1.35624  |
| N  | -1.38891 | 0.96483  | 3.80796  |
| N  | -1.13298 | 1.32465  | -0.83354 |
| N  | -0.12244 | -1.11415 | 1.44581  |
| N  | 1.64517  | 0.73628  | -0.78998 |
| N  | 1.41195  | 1.15808  | 3.50816  |
| C  | 1.14494  | 2.52205  | 3.53368  |
| C  | 0.37561  | 5.30336  | 0.33231  |
| C  | 2.74639  | 1.01024  | 3.66272  |
| C  | -0.66661 | 2.62337  | -0.88382 |
| C  | -2.60663 | 2.87250  | 4.03387  |
| H  | -2.86132 | 3.78686  | 4.02155  |
| C  | 0.51873  | 6.67361  | 0.30553  |
| C  | -0.28054 | 5.34763  | 2.57886  |
| C  | 1.75573  | 2.12523  | -0.55514 |
| C  | -0.20041 | 4.55314  | 3.71269  |
| C  | -3.41467 | 1.80586  | 4.35408  |
| H  | -4.32614 | 1.84039  | 4.61316  |
| C  | 0.34046  | -5.37757 | 3.80553  |
| C  | 1.70101  | 5.06440  | -1.63463 |
| H  | 2.06607  | 4.52539  | -2.32611 |
| C  | -0.20955 | -2.50150 | 1.42961  |
| C  | 0.94951  | 4.46539  | -0.63474 |
| C  | 1.92882  | 6.41027  | -1.64641 |
| H  | 2.49636  | 6.79239  | -2.30433 |
| C  | -0.29453 | 7.47470  | 1.29678  |
| C  | 0.66736  | 3.00873  | -0.63751 |
| C  | 2.37277  | 3.21367  | 3.66706  |
| H  | 2.48616  | 4.15511  | 3.70162  |
| C  | 3.43218  | -0.34666 | 3.72159  |
| C  | -2.39004 | 1.33195  | -1.32616 |
| C  | -0.12967 | 7.33337  | 3.88571  |
| H  | -0.09317 | 8.28039  | 3.95437  |
| C  | 3.11980  | 2.45300  | -0.51760 |
| H  | 3.48195  | 3.31205  | -0.33535 |

|   |          |          |          |
|---|----------|----------|----------|
| C | -1.32859 | 2.35584  | 3.72510  |
| C | -1.69113 | 3.46962  | -1.38711 |
| H | -1.64148 | 4.41097  | -1.50214 |
| C | -2.53024 | -0.92744 | -2.31986 |
| H | -2.45825 | -0.56863 | -3.22840 |
| H | -3.05095 | -1.75790 | -2.33768 |
| H | -1.63566 | -1.11035 | -1.96723 |
| C | -0.13524 | 5.18509  | 4.94229  |
| H | -0.11100 | 4.66622  | 5.73767  |
| C | -3.28800 | -1.63568 | 3.35517  |
| H | -4.05035 | -1.26478 | 2.86544  |
| H | -3.48595 | -2.55824 | 3.62088  |
| H | -2.49430 | -1.62550 | 2.77883  |
| C | 1.32020  | 7.22155  | -0.68502 |
| H | 1.45826  | 8.15987  | -0.71085 |
| C | -2.75699 | 2.66674  | -1.67878 |
| H | -3.58995 | 2.94739  | -2.04363 |
| C | -0.10410 | 6.56010  | 5.02809  |
| H | -0.06681 | 6.97902  | 5.88100  |
| C | -3.01965 | -0.78566 | 4.61165  |
| C | 0.18943  | 8.93077  | 1.41146  |
| H | 1.11759  | 8.94417  | 1.72848  |
| H | -0.38015 | 9.41637  | 2.04695  |
| H | 0.14107  | 9.36193  | 0.53168  |
| C | -4.61000 | 0.40923  | -2.03706 |
| H | -5.01736 | 1.16283  | -1.55783 |
| H | -5.18937 | -0.37736 | -1.95895 |
| H | -4.50349 | 0.64495  | -2.98197 |
| C | -1.77107 | 7.49774  | 0.81212  |
| H | -1.82226 | 7.94164  | -0.06078 |
| H | -2.31886 | 7.99102  | 1.45916  |
| H | -2.10459 | 6.58085  | 0.73174  |
| C | -3.23274 | 0.09834  | -1.42351 |
| C | 2.72810  | -1.20946 | 4.72306  |
| H | 2.90392  | -0.87320 | 5.62681  |
| H | 3.06027  | -2.13127 | 4.64707  |
| H | 1.76460  | -1.19647 | 4.55043  |
| C | 3.41306  | -0.98161 | 2.31090  |
| H | 2.49419  | -1.00881 | 1.97320  |
| H | 3.77128  | -1.89479 | 2.35839  |
| H | 3.96715  | -0.44663 | 1.70349  |
| C | 0.07710  | -3.23804 | 2.59406  |
| H | 0.31145  | -2.78937 | 3.39663  |
| C | 2.88826  | 0.28570  | -0.97437 |
| C | -3.49194 | -0.49384 | -0.04770 |
| H | -2.63759 | -0.69594 | 0.38897  |

|   |          |          |          |
|---|----------|----------|----------|
| H | -4.01305 | -1.31932 | -0.13925 |
| H | -3.99230 | 0.15097  | 0.49583  |
| C | -0.31533 | -5.30849 | 1.40099  |
| H | -0.33290 | -6.25608 | 1.37376  |
| C | 3.17210  | -0.94444 | -3.08037 |
| H | 2.27122  | -0.69129 | -3.36849 |
| H | 3.42332  | -1.79211 | -3.50047 |
| H | 3.80660  | -0.24574 | -3.34593 |
| C | 4.58152  | -1.55384 | -1.17490 |
| H | 5.21987  | -0.83456 | -1.36409 |
| H | 4.81788  | -2.34751 | -1.70318 |
| H | 4.61432  | -1.77748 | -0.22210 |
| C | 4.88717  | -0.16619 | 4.14128  |
| H | 5.34995  | 0.39559  | 3.48367  |
| H | 5.32364  | -1.04321 | 4.18719  |
| H | 4.92329  | 0.26491  | 5.02105  |
| C | 3.36732  | 2.28361  | 3.73243  |
| H | 4.29673  | 2.45705  | 3.81177  |
| C | -0.20991 | 6.73327  | 2.63378  |
| C | -2.62884 | 0.64931  | 4.22308  |
| C | -0.12780 | 3.06709  | 3.60096  |
| C | -1.89615 | -1.38965 | 5.43228  |
| H | -2.13614 | -2.30412 | 5.69398  |
| H | -1.74940 | -0.84785 | 6.23498  |
| H | -1.07544 | -1.40928 | 4.89837  |
| C | 3.82571  | 1.33072  | -0.78551 |
| H | 4.77177  | 1.25531  | -0.83771 |
| C | 3.19724  | -1.10422 | -1.53793 |
| C | -4.30166 | -0.74749 | 5.44826  |
| H | -5.02254 | -0.34025 | 4.92394  |
| H | -4.14798 | -0.22066 | 6.25842  |
| H | -4.55518 | -1.66190 | 5.69633  |
| C | -0.62479 | -4.55585 | 0.26789  |
| C | -0.59017 | -3.20421 | 0.28481  |
| H | -0.82814 | -2.72554 | -0.49905 |
| C | 2.17899  | -2.12855 | -1.12204 |
| H | 2.21551  | -2.24961 | -0.15059 |
| H | 2.37148  | -2.98069 | -1.56459 |
| H | 1.28154  | -1.81991 | -1.37804 |
| C | 0.01971  | -4.63548 | 2.56994  |
| C | -0.96492 | -5.30703 | -0.95443 |

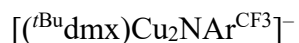

Charge = -1, Spin Multiplicity = 2

|    |          |          |          |
|----|----------|----------|----------|
| Cu | 0.00000  | 0.00000  | 2.83971  |
| Cu | 0.00000  | 0.00000  | 0.00000  |
| F  | -5.34838 | -3.44389 | 4.11917  |
| F  | -3.65506 | -2.61858 | 5.12278  |
| F  | -3.63678 | -4.66293 | 4.48856  |
| O  | 3.80620  | 2.63615  | 1.51717  |
| N  | 0.38572  | 1.74262  | 3.67849  |
| N  | -0.21525 | 1.73605  | -0.98810 |
| N  | -0.97314 | -0.68833 | 1.41613  |
| N  | 1.86631  | -0.23776 | -0.67354 |
| N  | 1.61682  | -0.88380 | 3.72110  |
| C  | 2.78652  | -0.12804 | 3.58442  |
| C  | 4.12782  | 3.40493  | 0.42378  |
| C  | 3.23984  | 3.28687  | -0.65970 |
| C  | 5.82950  | 3.36360  | 2.65936  |
| C  | 1.71536  | 2.12607  | 3.82849  |
| C  | 2.66752  | 0.91346  | -0.71443 |
| C  | 0.84127  | 2.63365  | -0.78935 |
| C  | 5.25976  | 4.21677  | 0.37522  |
| C  | 6.59703  | 3.26081  | 3.82152  |
| H  | 7.42834  | 3.71986  | 3.87249  |
| C  | 2.01126  | -2.15549 | 3.89654  |
| C  | 3.46078  | 4.09269  | -1.76916 |
| H  | 2.86467  | 4.04684  | -2.50746 |
| C  | 2.68414  | -1.26988 | -0.91531 |
| C  | -1.27260 | 2.46165  | -1.36699 |
| C  | -0.36547 | 2.79474  | 4.05090  |
| C  | 3.42685  | -2.26049 | 3.81817  |
| H  | 3.93772  | -3.05628 | 3.90030  |
| C  | 1.76149  | 3.46593  | 4.30163  |
| H  | 2.54042  | 3.98059  | 4.47398  |
| C  | 0.36528  | 3.95393  | -1.00782 |
| H  | 0.86000  | 4.75797  | -0.90997 |
| C  | -0.95316 | 3.83919  | -1.38750 |
| H  | -1.53770 | 4.55029  | -1.61982 |
| C  | 1.02104  | -3.26968 | 4.19474  |
| C  | 0.46300  | 3.87400  | 4.46136  |
| H  | 0.17336  | 4.71846  | 4.78506  |
| C  | 6.33562  | 4.14118  | 1.45203  |
| C  | 4.15563  | 1.91472  | 3.71068  |
| C  | 4.01202  | 0.53871  | -0.97307 |
| H  | 4.76060  | 1.11895  | -1.03494 |
| C  | -0.02696 | -2.77656 | 5.20108  |

|   |          |          |          |
|---|----------|----------|----------|
| H | 0.41762  | -2.50170 | 6.02885  |
| H | -0.65988 | -3.49945 | 5.39508  |
| H | -0.51081 | -2.01307 | 4.82172  |
| C | 1.75753  | -4.46919 | 4.80495  |
| H | 2.40065  | -4.82246 | 4.15478  |
| H | 1.11013  | -5.16735 | 5.03601  |
| H | 2.23513  | -4.18435 | 5.61189  |
| C | 4.01792  | -0.82334 | -1.11439 |
| H | 4.77098  | -1.36756 | -1.31024 |
| C | -3.26387 | -3.41458 | 0.44178  |
| C | -2.40607 | -2.32935 | 0.32621  |
| H | -2.10311 | -2.07068 | -0.53511 |
| C | -2.59662 | -1.96182 | 2.69307  |
| H | -2.41935 | -1.44321 | 3.46806  |
| C | 2.72510  | -3.35686 | -2.27116 |
| H | 2.23580  | -2.94744 | -3.01446 |
| H | 2.54509  | -4.32051 | -2.25292 |
| H | 3.68443  | -3.20685 | -2.38816 |
| C | -2.57123 | 1.80946  | -1.81155 |
| C | 0.33700  | -3.73668 | 2.90556  |
| H | -0.00847 | -2.96048 | 2.41889  |
| H | -0.40354 | -4.33925 | 3.12851  |
| H | 0.98800  | -4.21078 | 2.34459  |
| C | 2.97289  | -3.45392 | 0.21433  |
| H | 3.94165  | -3.43542 | 0.07381  |
| H | 2.66516  | -4.38385 | 0.25264  |
| H | 2.75451  | -3.00284 | 1.05609  |
| C | -1.87335 | 2.77797  | 3.96628  |
| C | 7.52213  | 3.36153  | 0.85873  |
| H | 8.23515  | 3.29635  | 1.52681  |
| H | 7.85835  | 3.83024  | 0.06672  |
| H | 7.22865  | 2.46168  | 0.60709  |
| C | -3.43681 | 2.81097  | -2.56745 |
| H | -3.68068 | 3.54857  | -1.96963 |
| H | -4.25009 | 2.36658  | -2.88507 |
| H | -2.93735 | 3.16363  | -3.33275 |
| C | -4.00752 | -3.43156 | 4.11821  |
| C | 4.95759  | 1.84313  | 4.84446  |
| H | 4.66783  | 1.33388  | 5.59123  |
| C | 2.17940  | 2.22403  | -0.65976 |
| C | 4.53840  | 4.96502  | -1.81427 |
| H | 4.65814  | 5.53288  | -2.56658 |
| C | 6.17800  | 2.50887  | 4.90119  |
| H | 6.72131  | 2.44543  | 5.67750  |
| C | 3.91471  | -1.00089 | 3.59933  |
| H | 4.82361  | -0.75595 | 3.48168  |

|   |          |          |          |
|---|----------|----------|----------|
| C | -1.97223 | -1.59692 | 1.45781  |
| C | 5.43540  | 5.00529  | -0.76643 |
| H | 6.19007  | 5.58202  | -0.82209 |
| C | 2.81434  | 1.26677  | 3.66473  |
| C | 2.26967  | -2.73002 | -0.95490 |
| C | 4.62532  | 2.66898  | 2.62005  |
| C | 0.76527  | -2.91233 | -0.82602 |
| H | 0.46275  | -2.53067 | 0.02405  |
| H | 0.54796  | -3.86775 | -0.85045 |
| H | 0.31497  | -2.45698 | -1.56879 |
| C | -2.24830 | 0.62480  | -2.74107 |
| H | -1.75065 | 0.94702  | -3.52004 |
| H | -3.08217 | 0.20451  | -3.03797 |
| H | -1.70889 | -0.03388 | -2.25555 |
| C | -3.44330 | -3.04213 | 2.79225  |
| C | -3.77197 | -3.80482 | 1.67335  |
| H | -4.32898 | -4.57095 | 1.75104  |
| C | -3.62854 | -4.16678 | -0.76444 |
| C | -3.35864 | 1.30444  | -0.59814 |
| H | -2.80215 | 0.68705  | -0.07986 |
| H | -4.16396 | 0.83761  | -0.90353 |
| H | -3.61476 | 2.06348  | -0.03513 |
| C | 6.79087  | 5.54921  | 1.87676  |
| H | 6.03331  | 6.03395  | 2.26589  |
| H | 7.12149  | 6.03541  | 1.09291  |
| H | 7.50752  | 5.47428  | 2.54072  |
| C | -2.37117 | 3.51101  | 2.70219  |
| H | -2.16771 | 4.46651  | 2.77555  |
| H | -3.34028 | 3.39052  | 2.61460  |
| C | -2.51125 | 3.60370  | 5.22927  |
| H | -2.27853 | 3.15019  | 6.06636  |
| H | -3.48372 | 3.64011  | 5.13654  |
| C | -2.62370 | 1.44334  | 3.99070  |
| H | -2.52982 | 0.99982  | 3.12255  |
| H | -3.57427 | 1.60753  | 4.17232  |
| F | -4.31095 | -3.43787 | -1.62699 |
| F | -4.39017 | -5.24270 | -0.51728 |
| F | -2.57617 | -4.63868 | -1.42406 |
| H | -2.15548 | 4.09467  | 5.52695  |
| H | -1.88277 | 3.47991  | 2.00040  |
| H | -1.97300 | 0.72811  | 4.30534  |



(<sup>t</sup>Bu<sub>2</sub>dmx)Cu<sub>2</sub>NAr<sup>OMe</sup>, BS(1,1)  
Charge = 0, Spin Multiplicity = 1

|    |          |          |          |
|----|----------|----------|----------|
| Cu | 0.00000  | 0.00000  | 0.00000  |
| Cu | 0.00000  | 0.00000  | 2.85652  |
| O  | 2.45785  | 3.82012  | 1.49281  |
| O  | -3.11449 | -5.89497 | 1.30765  |
| N  | 1.77268  | -0.31985 | -0.81362 |
| N  | -0.21319 | 1.75652  | -0.81611 |
| N  | 1.62755  | 0.61114  | 3.72047  |
| N  | -0.56569 | -0.96501 | 1.43810  |
| N  | -1.08732 | 1.42595  | 3.60028  |
| C  | 3.28397  | 3.15735  | -0.59172 |
| C  | 2.76517  | 0.02505  | 4.06746  |
| C  | 2.23024  | 2.10174  | -0.64044 |
| C  | 3.32438  | 4.08418  | 0.47510  |
| C  | 2.64760  | 0.77144  | -0.61724 |
| C  | 4.18190  | 3.30637  | -1.62151 |
| H  | 4.16578  | 2.70123  | -2.35302 |
| C  | 1.83678  | 2.00658  | 3.71340  |
| C  | 1.35654  | 4.38962  | 3.47065  |
| C  | 2.97471  | 5.94543  | 2.52277  |
| C  | 5.07481  | 5.25997  | -0.56043 |
| H  | 5.68505  | 5.98816  | -0.57457 |
| C  | 3.76319  | 1.01430  | 4.33608  |
| H  | 4.65785  | 0.86073  | 4.62045  |
| C  | 4.19246  | 6.18613  | 1.62989  |
| C  | 4.19469  | 5.15808  | 0.46997  |
| C  | 1.64985  | 6.55707  | 4.44586  |
| H  | 1.39556  | 7.21204  | 5.08579  |
| C  | 2.50656  | -1.40020 | -1.01739 |
| C  | 1.02386  | 5.31252  | 4.45675  |
| H  | 0.38328  | 5.09642  | 5.12357  |
| C  | 1.97799  | -2.76140 | -1.40893 |
| C  | 2.62457  | 6.85095  | 3.52799  |
| H  | 3.07373  | 7.68899  | 3.57755  |
| C  | 2.93734  | -1.48731 | 4.16084  |
| C  | -0.53179 | 2.72876  | 3.50236  |
| C  | 3.96939  | 0.27100  | -0.67378 |
| H  | 4.76910  | 0.77007  | -0.54997 |
| C  | 3.87830  | -1.07409 | -0.94588 |
| H  | 4.60562  | -1.67300 | -1.06214 |
| C  | -2.67348 | 2.08398  | -1.35653 |
| C  | 0.58357  | 3.86969  | -1.23630 |
| H  | 1.16966  | 4.61118  | -1.32283 |
| C  | -3.37292 | 0.46647  | 3.97640  |

|   |          |          |          |
|---|----------|----------|----------|
| C | 2.14335  | -3.70644 | -0.24423 |
| H | 3.07565  | -3.69317 | 0.05790  |
| H | 1.90262  | -4.61494 | -0.52189 |
| H | 1.55910  | -3.42485 | 0.49153  |
| C | 4.19763  | 7.59801  | 1.07050  |
| H | 3.39714  | 7.73650  | 0.52280  |
| H | 4.99862  | 7.72600  | 0.51776  |
| H | 4.20528  | 8.24263  | 1.80816  |
| C | -1.59461 | -4.39078 | 2.45761  |
| H | -1.40109 | -5.02163 | 3.14145  |
| C | -0.78801 | 3.83680  | -1.48863 |
| H | -1.31224 | 4.53464  | -1.70500 |
| C | -2.73748 | -3.78032 | 0.41686  |
| H | -3.34067 | -3.99451 | -0.28289 |
| C | 5.43903  | 5.97259  | 2.48587  |
| H | 5.49197  | 6.67512  | 3.16730  |
| H | 6.23707  | 6.00776  | 1.91729  |
| H | 5.38763  | 5.09586  | 2.92264  |
| C | -2.85998 | 0.57589  | -1.19613 |
| H | -2.23006 | 0.10364  | -1.77771 |
| H | -3.77709 | 0.33240  | -1.44380 |
| H | -2.69574 | 0.32235  | -0.26458 |
| C | 0.51912  | -2.72842 | -1.83167 |
| H | -0.02327 | -2.35638 | -1.10561 |
| H | 0.21433  | -3.63906 | -2.03142 |
| H | 0.42093  | -2.17113 | -2.63079 |
| C | 2.84305  | -2.05574 | 2.74788  |
| H | 1.92958  | -1.94247 | 2.41174  |
| H | 3.07102  | -3.00913 | 2.76336  |
| H | 3.46913  | -1.57948 | 2.16233  |
| C | 4.29237  | -1.83338 | 4.73275  |
| H | 4.99326  | -1.50893 | 4.12839  |
| H | 4.36700  | -2.80548 | 4.82990  |
| H | 4.39595  | -1.40733 | 5.60874  |
| C | -2.66244 | -0.71361 | 4.64878  |
| H | -2.03610 | -1.12140 | 4.01561  |
| H | -3.32769 | -1.37971 | 4.92661  |
| H | -2.17242 | -0.39419 | 5.43543  |
| C | -3.54406 | 2.82989  | -0.37362 |
| H | -3.27680 | 2.59830  | 0.54210  |
| H | -4.48214 | 2.57931  | -0.51243 |
| H | -3.43912 | 3.79382  | -0.50862 |
| C | -0.99002 | -3.14862 | 2.45871  |
| H | -0.41307 | -2.92726 | 3.17881  |
| C | -3.02160 | -6.81986 | 2.38484  |
| H | -2.08951 | -7.10223 | 2.49193  |

|   |          |          |          |
|---|----------|----------|----------|
| H | -3.57815 | -7.60351 | 2.19219  |
| H | -3.33127 | -6.39361 | 3.21067  |
| C | -3.13642 | 2.45009  | -2.82082 |
| H | -3.16953 | 3.42375  | -2.91840 |
| H | -4.02607 | 2.07449  | -2.98462 |
| H | -2.49920 | 2.07808  | -3.46523 |
| C | -4.52358 | 0.93898  | 4.83319  |
| H | -4.18974 | 1.18387  | 5.72270  |
| H | -5.18585 | 0.22044  | 4.91947  |
| H | -4.94253 | 1.72167  | 4.41567  |
| C | 0.90715  | 2.56205  | -0.82637 |
| C | -1.25289 | 2.52422  | -1.22855 |
| C | 2.26701  | 4.73790  | 2.48752  |
| C | 3.16456  | 2.22869  | 4.10396  |
| H | 3.58284  | 3.07863  | 4.19086  |
| C | -1.19438 | -2.19881 | 1.44362  |
| C | 0.83473  | 2.96324  | 3.50449  |
| C | 5.11397  | 4.33430  | -1.59762 |
| H | 5.77045  | 4.40432  | -2.28099 |
| C | -2.09253 | -2.55941 | 0.43488  |
| H | -2.26588 | -1.94166 | -0.26394 |
| C | -1.58810 | 3.66915  | 3.46202  |
| H | -1.50532 | 4.60810  | 3.34153  |
| C | -2.48607 | -4.70324 | 1.44718  |
| C | -2.74969 | 2.96809  | 3.63502  |
| H | -3.62345 | 3.33551  | 3.67013  |
| C | -2.41994 | 1.61477  | 3.75382  |
| C | 2.78846  | -3.28056 | -2.61165 |
| H | 2.63974  | -2.69552 | -3.38502 |
| H | 2.50097  | -4.19117 | -2.83359 |
| H | 3.74240  | -3.28693 | -2.38632 |
| C | -3.94010 | 0.00698  | 2.62608  |
| H | -4.46528 | 0.73139  | 2.22895  |
| H | -4.51638 | -0.77570 | 2.76191  |
| H | -3.20364 | -0.23195 | 2.02721  |
| C | 1.85033  | -2.05967 | 5.05629  |
| H | 1.98839  | -1.74938 | 5.97676  |
| H | 1.89108  | -3.03880 | 5.03484  |
| H | 0.97277  | -1.76086 | 4.73803  |

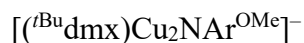

Charge = -1, Spin Multiplicity = 2

|    |          |          |          |
|----|----------|----------|----------|
| Cu | 0.00000  | -0.00000 | 0.00000  |
| Cu | -0.00000 | -0.00000 | 2.94363  |
| O  | 3.59990  | 5.66262  | 1.44343  |
| O  | -3.15065 | -3.47562 | 1.60849  |
| N  | 0.33041  | -1.85825 | -0.74000 |
| N  | -1.71851 | 0.11061  | -1.02296 |
| N  | -1.69449 | -0.07684 | 3.97123  |
| N  | 0.71953  | 0.88403  | 1.46739  |
| N  | 0.64739  | -1.79598 | 3.73052  |
| C  | -2.55140 | -1.01485 | -0.97952 |
| C  | -3.12272 | -3.40521 | -0.74049 |
| C  | -2.44712 | 1.10971  | -1.53391 |
| C  | -0.76285 | -2.71984 | -0.56078 |
| C  | -0.34192 | -2.79204 | 3.64013  |
| C  | -3.77451 | 0.20276  | 4.85647  |
| H  | -4.52782 | 0.62617  | 5.25187  |
| C  | 2.93157  | 4.45552  | 1.54144  |
| C  | -3.84646 | -0.64525 | -1.43708 |
| H  | -4.61071 | -1.20871 | -1.48281 |
| C  | -2.61326 | -3.74526 | 3.87403  |
| C  | 1.48409  | 2.00272  | 1.50676  |
| C  | -2.35065 | -1.30898 | 4.00193  |
| C  | -3.36502 | -4.18331 | 2.77918  |
| C  | -1.72040 | -2.54595 | 3.77346  |
| C  | -2.09754 | -2.30944 | -0.68846 |
| C  | -3.57902 | -3.85939 | -1.97389 |
| H  | -3.25292 | -3.45830 | -2.77290 |
| C  | -3.78329 | 0.67836  | -1.79947 |
| H  | -4.48927 | 1.20398  | -2.15665 |
| C  | 1.62768  | -3.86438 | 3.78217  |
| H  | 2.30353  | -4.53054 | 3.83400  |
| C  | 1.69532  | 2.75010  | 2.69329  |
| H  | 1.35107  | 2.41077  | 3.51065  |
| C  | 2.38446  | 3.96067  | 2.71665  |
| H  | 2.47942  | 4.44400  | 3.52974  |
| C  | 0.27803  | -4.06765 | 3.64064  |
| H  | -0.15967 | -4.90560 | 3.55865  |
| C  | -2.77621 | -4.40228 | 5.09348  |
| H  | -2.27028 | -4.12825 | 5.85013  |
| C  | 2.10400  | 2.55109  | 0.33369  |
| H  | 2.02484  | 2.08032  | -0.48829 |
| C  | 1.08408  | -4.00537 | -0.72556 |
| H  | 1.68351  | -4.73979 | -0.76744 |

|   |          |          |          |
|---|----------|----------|----------|
| C | -4.98216 | -5.47138 | -0.88722 |
| H | -5.61573 | -6.17521 | -0.94827 |
| C | -4.50568 | -4.89195 | -2.05104 |
| H | -4.81085 | -5.19901 | -2.89729 |
| C | -3.67752 | -5.45686 | 5.20469  |
| H | -3.79215 | -5.89558 | 6.03867  |
| C | -0.27176 | -4.06264 | -0.51029 |
| H | -0.78599 | -4.84570 | -0.35789 |
| C | 3.13526  | -1.75674 | 4.16945  |
| C | -1.85091 | 2.47158  | -1.82601 |
| C | -2.18389 | 2.28184  | 4.67221  |
| C | 3.76638  | 6.38982  | 2.65521  |
| H | 4.24753  | 7.22439  | 2.47233  |
| H | 4.27928  | 5.84938  | 3.29167  |
| H | 2.88667  | 6.59572  | 3.03527  |
| C | -0.92050 | 2.38529  | 5.54908  |
| H | -1.12418 | 2.06682  | 6.45478  |
| H | -0.62662 | 3.31914  | 5.58955  |
| H | -0.20883 | 1.83524  | 5.16216  |
| C | -5.13542 | -7.20744 | 1.53771  |
| H | -5.66531 | -7.46790 | 0.75487  |
| H | -5.53429 | -7.59293 | 2.34377  |
| H | -4.21982 | -7.53891 | 1.43592  |
| C | 4.32179  | -2.62951 | 3.73518  |
| H | 4.28798  | -3.48669 | 4.20903  |
| H | 5.16055  | -2.17170 | 3.94990  |
| H | 4.27394  | -2.78913 | 2.76914  |
| C | -3.32941 | 3.04763  | 5.35589  |
| H | -4.13049 | 3.00823  | 4.79160  |
| H | -3.06655 | 3.98272  | 5.48592  |
| H | -3.52153 | 2.63866  | 6.22469  |
| C | -3.62462 | -3.99916 | 0.41687  |
| C | -2.54933 | 0.82113  | 4.49237  |
| C | -4.55383 | -5.04738 | 0.37311  |
| C | -5.11565 | -5.66535 | 1.65998  |
| C | -3.66259 | -1.12956 | 4.52575  |
| H | -4.32948 | -1.79901 | 4.62769  |
| C | -4.26500 | -5.24470 | 2.85867  |
| C | 1.81328  | -2.44018 | 3.83584  |
| C | -4.40503 | -5.86540 | 4.10428  |
| H | -5.01581 | -6.58586 | 4.19585  |
| C | 1.41634  | -2.62823 | -0.87480 |
| C | 2.80932  | 3.73613  | 0.35808  |
| H | 3.21301  | 4.06223  | -0.43727 |
| C | -1.91947 | 2.91379  | 3.28476  |
| H | -1.20038 | 2.42402  | 2.83354  |

|   |          |          |          |
|---|----------|----------|----------|
| H | -1.65390 | 3.85147  | 3.39711  |
| H | -2.73533 | 2.86683  | 2.74379  |
| C | -6.54424 | -5.13814 | 1.86152  |
| H | -6.52084 | -4.16418 | 1.97186  |
| H | -6.93471 | -5.55020 | 2.66182  |
| H | -7.08980 | -5.36543 | 1.07935  |
| C | 3.22867  | -1.57134 | 5.69695  |
| H | 2.52000  | -0.96368 | 5.99630  |
| H | 4.10296  | -1.19166 | 5.92655  |
| H | 3.12299  | -2.44023 | 6.13805  |
| C | 3.23054  | -0.37436 | 3.52280  |
| H | 3.18590  | -0.46605 | 2.54800  |
| H | 4.08017  | 0.04461  | 3.77371  |
| H | 2.48741  | 0.18282  | 3.83373  |
| C | 2.77122  | -2.04029 | -1.23587 |
| C | -1.36520 | 3.11514  | -0.47099 |
| H | -2.14299 | 3.33529  | 0.08428  |
| H | -0.85913 | 3.93157  | -0.65885 |
| H | -0.79345 | 2.47874  | 0.00734  |
| C | -0.60791 | 2.28463  | -2.72010 |
| H | 0.04762  | 1.72402  | -2.25427 |
| H | -0.20873 | 3.15789  | -2.91211 |
| H | -0.87088 | 1.85188  | -3.55811 |
| C | -2.85412 | 3.38836  | -2.46594 |
| H | -3.14760 | 3.00455  | -3.31820 |
| H | -2.44088 | 4.26369  | -2.62526 |
| H | -3.62536 | 3.49339  | -1.87078 |
| C | 3.75220  | -3.07727 | -1.64959 |
| H | 3.87968  | -3.71676 | -0.91816 |
| H | 4.60692  | -2.65100 | -1.86394 |
| H | 3.41500  | -3.54799 | -2.44129 |
| C | 2.56669  | -1.00168 | -2.41980 |
| H | 2.21991  | -1.46930 | -3.20803 |
| H | 3.42508  | -0.58184 | -2.64075 |
| H | 1.92788  | -0.31144 | -2.14271 |
| C | 3.28319  | -1.20103 | -0.04769 |
| H | 2.60757  | -0.53398 | 0.19590  |
| H | 4.11364  | -0.74710 | -0.30150 |
| H | 3.45155  | -1.78644 | 0.71894  |

**Respective Contributions.** K.M.C. and T.A.B. conceived the experimental design, executed syntheses, characterized new complexes, and assessed nitrene transfer reactivity from the dinuclear copper complexes. J.T.L., I.M.D., and K.M.L. performed XANES measurements, EPR simulations, and computational studies. D.A.I. assessed nitrene transfer reactivity from mononuclear copper complexes. S.L.Z. assisted K.M.C. in crystallographic refinement. All authors contributed of the construction of this manuscript.

## References.

- (1) Rieth, R. D.; Mankad, N. P.; Calimano, E.; Sadighi, J. P., Palladium-Catalyzed Cross-Coupling of Pyrrole Anions with Aryl Chlorides, Bromides, and Iodides. *Org. Lett.* **2004**, *6*, 3981.
- (2) Chang, C. J.; Deng, Y.; Heyduk, A. F.; Chang, C. K.; Nocera, D. G., Xanthene-Bridged Cofacial Bisporphyrins. *Inorg. Chem.* **2000**, *39*, 959.
- (3) Laitar, D. S.; Mathison, C. J. N.; Davis, W. M.; Sadighi, J. P., Copper(I) Complexes of a Heavily Fluorinated  $\beta$ -Diketiminato Ligand: Synthesis, Electronic Properties, and Intramolecular Aerobic Hydroxylation. *Inorg. Chem.* **2003**, *42*, 7354.
- (4) Smith, P. A. S.; Hall, J. H., Kinetic Evidence for the Formation of Azene (Electron-Deficient Nitrogen) Intermediates from Aryl Azides. *J. Am. Chem. Soc.* **1962**, *84*, 480.
- (5) Jang, E. S.; McMullin, C. L.; Käß, M.; Meyer, K.; Cundari, T. R.; Warren, T. H., Copper(II) Anilides in  $sp^3$  C-H Amination. *J. Am. Chem. Soc.* **2014**, *136*, 10930.
- (6) Weitz, I. S.; Rabinovitz, M., The Application of  $C_8K$  for Organic Synthesis: Reduction of Substituted Naphthalenes. *J. Chem. Soc., Perkin Trans. 1* **1993**, 117.
- (7) Shibuya, M.; Tomizawa, M.; Suzuki, I.; Iwabuchi, Y., 2-Azaadamantane N-Oxyl (AZADO) and 1-Me-AZADO: Highly Efficient Organocatalysts for Oxidation of Alcohols. *J. Am. Chem. Soc.* **2006**, *128*, 8412.
- (8) Zhao, X.-F.; Zhang, C., Iodobenzene Dichloride as a Stoichiometric Oxidant for the Conversion of Alcohols into Carbonyl Compounds; Two Facile Methods for Its Preparation. *Synthesis* **2007**, *2007*, 551.
- (9) Hennessy, E. T.; Liu, R. Y.; Iovan, D. A.; Duncan, R. A.; Betley, T. A., Iron-Mediated Intermolecular N-Group Transfer Chemistry with Olefinic Substrates. *Chem. Sci.* **2014**, *5*, 1526.
- (10) Meyer, E. M.; Gambarotta, S.; Floriani, C.; Chiesi-Villa, A.; Guastini, C., Polynuclear Aryl Derivatives of Group 11 Metals. Synthesis, Solid State-Solution Structural Relationship, and Reactivity with Phosphines. *Organometallics* **1989**, *8*, 1067.
- (11) Scriven, E. F. V.; Turnbull, K., Azides: Their Preparation and Synthetic Uses. *Chem. Rev.* **1988**, *88*, 297.
- (12) Takeda, Y.; Okumura, S.; Minakata, S., A Practical Synthesis of Azobenzenes through Oxidative Dimerization of Aromatic Amines Using Tert-Butyl Hypoiodite. *Synthesis* **2013**, *45*, 1029.
- (13) George, S. J.; Lowery, M. D.; Solomon, E. I.; Cramer, S. P., Copper L-Edge Spectral Studies: A Direct Experimental Probe of the Ground-State Covalency in the Blue Copper Site in Plastocyanin. *J. Am. Chem. Soc.* **1993**, *115*, 2968.
- (14) Morháč, M.; Matoušek, V., Peak Clipping Algorithms for Background Estimation in Spectroscopic Data. *Appl. Spectrosc.* **2008**, *62*, 91.
- (15) Johnson, E. J.; Kleinlein, C.; Musgrave, R. A.; Betley, T. A., Diiron Oxo Reactivity in a Weak-Field Environment. *Chem. Sci.* **2019**, *10*, 6304.
- (16) Harman, W. H.; Harris, T. D.; Freedman, D. E.; Fong, H.; Chang, A.; Rinehart, J. D.; Ozarowski, A.; Sougrati, M. T.; Grandjean, F.; Long, G. J.; Long, J. R.; Chang, C. J., Slow Magnetic Relaxation in a Family of Trigonal Pyramidal Iron(II) Pyrrolide Complexes. *J. Am. Chem. Soc.* **2010**, *132*, 18115.
- (17) Palacios, F.; Vicario, J.; Aparicio, D., Efficient Synthesis of 1-Azadienes Derived from  $\alpha$ -Aminoesters. Regioselective Preparation of  $\alpha$ -Dehydroamino Acids, Vinylglycines, and  $\alpha$ -Amino Acids. *J. Org. Chem.* **2006**, *71*, 7690.



- (18) Wang, H.-W.; Lu, Y.; Zhang, B.; He, J.; Xu, H.-J.; Kang, Y.-S.; Sun, W.-Y.; Yu, J.-Q., Ligand-Promoted Rhodium(III)-Catalyzed *Ortho*-C–H Amination with Free Amines. *Angew. Chem. Int. Ed.* **2017**, *56*, 7449.
- (19) Wiese, S.; Aguila, M. J. B.; Kogut, E.; Warren, T. H.,  $\beta$ -Diketiminato Nickel Imides in Catalytic Nitrene Transfer to Isocyanides. *Organometallics* **2013**, *32*, 2300.
- (20) Jin, L.-M.; Lu, H.; Cui, Y.; Lizardi, C. L.; Arzua, T. N.; Wojtas, L.; Cui, X.; Zhang, X. P., Selective Radical Amination of Aldehydic C(sp<sup>2</sup>)–H Bonds with Fluoroaryl Azides Via Co(II)-Based Metalloradical Catalysis: Synthesis of N-Fluoroaryl Amides from Aldehydes under Neutral and Nonoxidative Conditions. *Chem. Sci.* **2014**, *5*, 2422.
- (21) Krause, L.; Herbst-Irmer, R.; Sheldrick, G. M.; Stalke, D., Comparison of Silver and Molybdenum Microfocus X-Ray Sources for Single-Crystal Structure Determination. *J. Appl. Crystallogr* **2015**, *48*, 3.
- (22) Sheldrick, G., SHELXT-Integrated Space-Group and Crystal-Structure Determination. *Acta Crystallogr. A* **2015**, *71*, 3.
- (23) Sheldrick, G. M., Crystal Structure Refinement with SHELXL. *Acta Crystallogr. C Struct. Chem* **2015**, *71*, 3.
- (24) Dolomanov, O. V.; Bourhis, L. J.; Gildea, R. J.; Howard, J. A. K.; Puschmann, H., Olex2: A Complete Structure Solution, Refinement and Analysis Program. *J. Appl. Crystallogr.* **2009**, *42*, 339.
- (25) Spek, A., Single-Crystal Structure Validation with the Program Platon. *J. Appl. Crystallogr* **2003**, *36*, 7.
- (26) Ramadhar, T. R.; Zheng, S.-L.; Chen, Y.-S.; Clardy, J., Analysis of Rapidly Synthesized Guest-Filled Porous Complexes with Synchrotron Radiation: Practical Guidelines for the Crystalline Sponge Method. *Acta Crystallogr. A* **2015**, *71*, 46.
- (27) POV-Ray - The Persistence of Vision Raytracer, <http://www.povray.org/>.
- (28) Neese, F., The Orca Program System. *Wiley Interdiscip. Rev. Comput. Mol. Sci.* **2012**, *2*, 73.
- (29) Devlin, F. J.; Finley, J. W.; Stephens, P. J.; Frisch, M. J., Ab Initio Calculation of Vibrational Absorption and Circular Dichroism Spectra Using Density Functional Force Fields: A Comparison of Local, Nonlocal, and Hybrid Density Functionals. *J. Phys. Chem.* **1995**, *99*, 16883.
- (30) Neese, F., Prediction and Interpretation of the <sup>57</sup>Fe Isomer Shift in Mössbauer Spectra by Density Functional Theory. *Inorg. Chim. Acta* **2002**, *337*, 181.
- (31) Weigend, F.; Ahlrichs, R., Balanced Basis Sets of Split Valence, Triple Zeta Valence and Quadruple Zeta Valence Quality for H to Rn: Design and Assessment of Accuracy. *Phys. Chem. Chem. Phys.* **2005**, *7*, 3297.
- (32) Lenthe, E. V.; Avoird, A. V. D.; Wormer, P. E. S., Density Functional Calculations of Molecular Hyperfine Interactions in the Zero Order Regular Approximation for Relativistic Effects. *J. Chem. Phys.* **1998**, *108*, 4783.
- (33) Wüllen, C. V., Molecular Density Functional Calculations in the Regular Relativistic Approximation: Method, Application to Coinage Metal Diatomics, Hydrides, Fluorides and Chlorides, and Comparison with First-Order Relativistic Calculations. *J. Chem. Phys.* **1998**, *109*, 392.
- (34) Klamt, A.; Schuurmann, G., Cosmo: A New Approach to Dielectric Screening in Solvents with Explicit Expressions for the Screening Energy and Its Gradient. *J. Chem. Soc., Perk. Trans. 2*, **1993**, 799.

- (35) Neese, F., A Spectroscopy Oriented Configuration Interaction Procedure. *J. Chem. Phys.* **2003**, *119*, 9428.
- (36) Neese, F., Importance of Direct Spin– Spin Coupling and Spin-Flip Excitations for the Zero-Field Splittings of Transition Metal Complexes: A Case Study. *J. Am. Chem. Soc.* **2006**, *128*, 10213.

# checkCIF/PLATON report

Structure factors have been supplied for datablock(s) 1

THIS REPORT IS FOR GUIDANCE ONLY. IF USED AS PART OF A REVIEW PROCEDURE FOR PUBLICATION, IT SHOULD NOT REPLACE THE EXPERTISE OF AN EXPERIENCED CRYSTALLOGRAPHIC REFEREE.

No syntax errors found. [CIF dictionary](#) [Interpreting this report](#)

## Datablock: 1

---

Bond precision: C-C = 0.0046 A                      Wavelength=0.71073

Cell:                      a=17.5563(12)              b=19.7585(14)              c=20.6328(14)  
                            alpha=90                      beta=111.704(2)              gamma=90

Temperature:              100 K

|                        | Calculated                             | Reported          |
|------------------------|----------------------------------------|-------------------|
| Volume                 | 6649.8(8)                              | 6649.8(8)         |
| Space group            | P 21/n                                 | P 21/n            |
| Hall group             | -P 2yn                                 | -P 2yn            |
| Moiety formula         | C73 H70 Cu2 N6 O, C4 H10<br>O, C2 H3 N | ?                 |
| Sum formula            | C79 H83 Cu2 N7 O2                      | C79 H83 Cu2 N7 O2 |
| Mr                     | 1289.63                                | 1289.60           |
| Dx, g cm <sup>-3</sup> | 1.288                                  | 1.288             |
| Z                      | 4                                      | 4                 |
| Mu (mm <sup>-1</sup> ) | 0.693                                  | 0.693             |
| F000                   | 2720.0                                 | 2720.0            |
| F000'                  | 2723.34                                |                   |
| h,k,lmax               | 20,23,24                               | 20,23,24          |
| Nref                   | 11852                                  | 11828             |
| Tmin,Tmax              | 0.913,0.936                            | 0.701,0.746       |
| Tmin'                  | 0.845                                  |                   |

Correction method= # Reported T Limits: Tmin=0.701 Tmax=0.746  
AbsCorr = MULTI-SCAN

Data completeness= 0.998                      Theta(max)= 25.111

R(reflections)= 0.0467( 9145)              wR2(reflections)= 0.1105( 11828)

S = 1.075                      Npar= 830

---

The following ALERTS were generated. Each ALERT has the format

**test-name\_ALERT\_alert-type\_alert-level.**

Click on the hyperlinks for more details of the test.

---

● **Alert level C**

|                                   |                                                  |           |
|-----------------------------------|--------------------------------------------------|-----------|
| <a href="#">PLAT232_ALERT_2_C</a> | Hirshfeld Test Diff (M-X) Cu1 --N3 .             | 6.5 s.u.  |
| <a href="#">PLAT232_ALERT_2_C</a> | Hirshfeld Test Diff (M-X) Cu2 --N6 .             | 6.0 s.u.  |
| <a href="#">PLAT244_ALERT_4_C</a> | Low 'Solvent' Ueq as Compared to Neighbors of    | C1S Check |
| <a href="#">PLAT910_ALERT_3_C</a> | Missing # of FCF Reflection(s) Below Theta(Min). | 6 Note    |
| <a href="#">PLAT911_ALERT_3_C</a> | Missing FCF Refl Between Thmin & STh/L= 0.597    | 20 Report |
| <a href="#">PLAT975_ALERT_2_C</a> | Check Calcd Resid. Dens. 1.09A From O1S          | 0.52 eA-3 |

---

● **Alert level G**

|                                   |                                                  |             |
|-----------------------------------|--------------------------------------------------|-------------|
| <a href="#">PLAT083_ALERT_2_G</a> | SHELXL Second Parameter in WGHT Unusually Large  | 12.58 Why ? |
| <a href="#">PLAT720_ALERT_4_G</a> | Number of Unusual/Non-Standard Labels .....      | 13 Note     |
| <a href="#">PLAT794_ALERT_5_G</a> | Tentative Bond Valency for Cu1 (I) .             | 0.99 Info   |
| <a href="#">PLAT794_ALERT_5_G</a> | Tentative Bond Valency for Cu2 (I) .             | 0.99 Info   |
| <a href="#">PLAT883_ALERT_1_G</a> | No Info/Value for _atom_sites_solution_primary . | Please Do ! |
| <a href="#">PLAT909_ALERT_3_G</a> | Percentage of I>2sig(I) Data at Theta(Max) Still | 58% Note    |
| <a href="#">PLAT933_ALERT_2_G</a> | Number of OMIT Records in Embedded .res File ... | 1 Note      |
| <a href="#">PLAT978_ALERT_2_G</a> | Number C-C Bonds with Positive Residual Density. | 4 Info      |

- 
- 0 **ALERT level A** = Most likely a serious problem - resolve or explain  
0 **ALERT level B** = A potentially serious problem, consider carefully  
6 **ALERT level C** = Check. Ensure it is not caused by an omission or oversight  
8 **ALERT level G** = General information/check it is not something unexpected

- 1 ALERT type 1 CIF construction/syntax error, inconsistent or missing data  
6 ALERT type 2 Indicator that the structure model may be wrong or deficient  
3 ALERT type 3 Indicator that the structure quality may be low  
2 ALERT type 4 Improvement, methodology, query or suggestion  
2 ALERT type 5 Informative message, check
- 
-

It is advisable to attempt to resolve as many as possible of the alerts in all categories. Often the minor alerts point to easily fixed oversights, errors and omissions in your CIF or refinement strategy, so attention to these fine details can be worthwhile. In order to resolve some of the more serious problems it may be necessary to carry out additional measurements or structure refinements. However, the purpose of your study may justify the reported deviations and the more serious of these should normally be commented upon in the discussion or experimental section of a paper or in the "special\_details" fields of the CIF. checkCIF was carefully designed to identify outliers and unusual parameters, but every test has its limitations and alerts that are not important in a particular case may appear. Conversely, the absence of alerts does not guarantee there are no aspects of the results needing attention. It is up to the individual to critically assess their own results and, if necessary, seek expert advice.

### **Publication of your CIF in IUCr journals**

A basic structural check has been run on your CIF. These basic checks will be run on all CIFs submitted for publication in IUCr journals (*Acta Crystallographica*, *Journal of Applied Crystallography*, *Journal of Synchrotron Radiation*); however, if you intend to submit to *Acta Crystallographica Section C* or *E* or *IUCrData*, you should make sure that full publication checks are run on the final version of your CIF prior to submission.

### **Publication of your CIF in other journals**

Please refer to the *Notes for Authors* of the relevant journal for any special instructions relating to CIF submission.

---

**PLATON version of 07/08/2019; check.def file version of 30/07/2019**

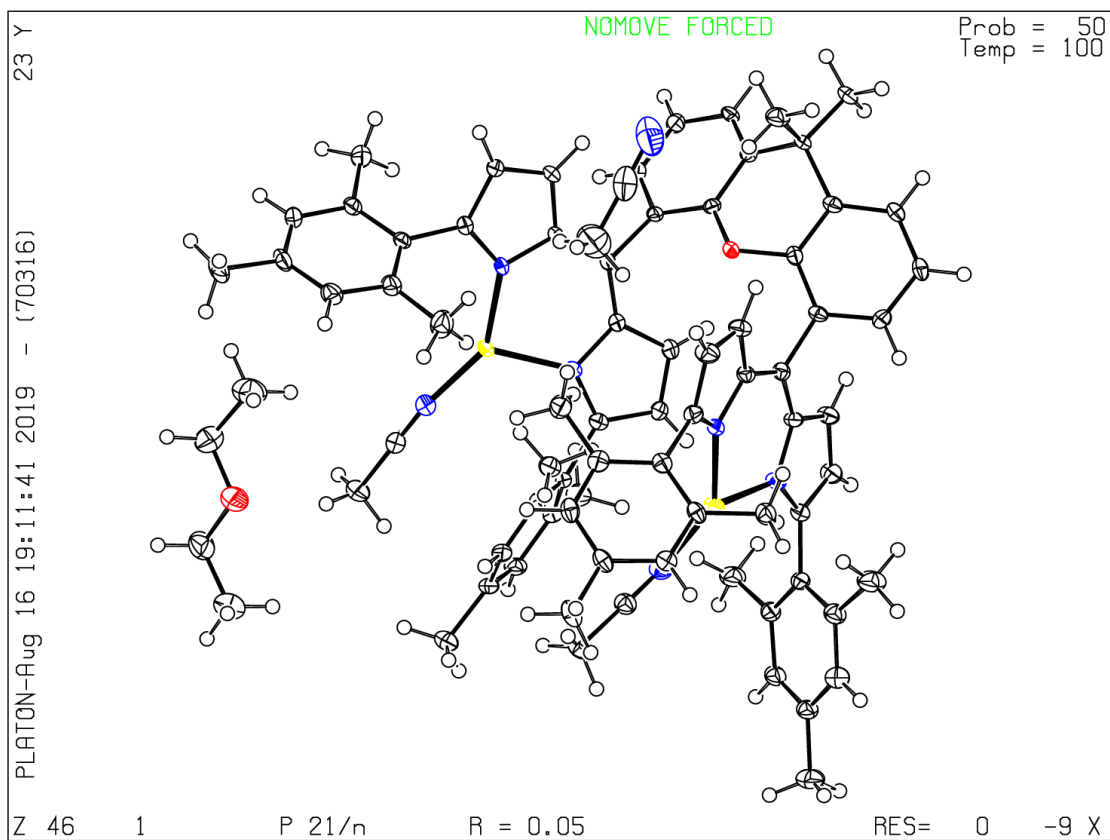

## checkCIF/PLATON report

Structure factors have been supplied for datablock(s) 2

THIS REPORT IS FOR GUIDANCE ONLY. IF USED AS PART OF A REVIEW PROCEDURE FOR PUBLICATION, IT SHOULD NOT REPLACE THE EXPERTISE OF AN EXPERIENCED CRYSTALLOGRAPHIC REFEREE.

No syntax errors found. [CIF dictionary](#) [Interpreting this report](#)

### Datablock: 2

---

Bond precision: C-C = 0.0074 A                      Wavelength=0.71073

Cell:                      a=12.304(3)                      b=16.241(4)                      c=18.007(5)  
                                 alpha=92.531(4)                      beta=92.075(5)                      gamma=92.793(5)

Temperature:    100 K

|                | Calculated                        | Reported          |
|----------------|-----------------------------------|-------------------|
| Volume         | 3587.9(16)                        | 3587.8(15)        |
| Space group    | P -1                              | P -1              |
| Hall group     | -P 1                              | -P 1              |
| Moiety formula | C76 H71 Cu2 N5 O2, 2(C4<br>H10 O) | ?                 |
| Sum formula    | C84 H91 Cu2 N5 O4                 | C84 H91 Cu2 N5 O4 |
| Mr             | 1361.72                           | 1361.69           |
| Dx, g cm-3     | 1.260                             | 1.260             |
| Z              | 2                                 | 2                 |
| Mu (mm-1)      | 0.647                             | 0.647             |
| F000           | 1440.0                            | 1440.0            |
| F000'          | 1441.73                           |                   |
| h,k,lmax       | 14,19,21                          | 14,19,21          |
| Nref           | 13149                             | 12852             |
| Tmin,Tmax      | 0.883,0.943                       | 0.466,0.745       |
| Tmin'          | 0.873                             |                   |

Correction method= # Reported T Limits: Tmin=0.466 Tmax=0.745  
AbsCorr = MULTI-SCAN

Data completeness= 0.977                      Theta(max)= 25.355

R(reflections)= 0.0679( 7846)                      wR2(reflections)= 0.1948( 12852)

S = 1.001                      Npar= 893

---

The following ALERTS were generated. Each ALERT has the format

**test-name\_ALERT\_alert-type\_alert-level.**

Click on the hyperlinks for more details of the test.

---

**Alert level C**

|                                   |                                                  |               |
|-----------------------------------|--------------------------------------------------|---------------|
| <a href="#">PLAT220_ALERT_2_C</a> | Non-Solvent Resd 1 C Ueq(max)/Ueq(min) Range     | 3.3 Ratio     |
| <a href="#">PLAT341_ALERT_3_C</a> | Low Bond Precision on C-C Bonds .....            | 0.00737 Ang.  |
| <a href="#">PLAT905_ALERT_3_C</a> | Negative K value in the Analysis of Variance ... | -0.301 Report |
| <a href="#">PLAT911_ALERT_3_C</a> | Missing FCF Refl Between Thmin & STh/L= 0.600    | 149 Report    |

---

**Alert level G**

|                                   |                                                             |             |
|-----------------------------------|-------------------------------------------------------------|-------------|
| <a href="#">PLAT002_ALERT_2_G</a> | Number of Distance or Angle Restraints on AtSite            | 15 Note     |
| <a href="#">PLAT003_ALERT_2_G</a> | Number of Uiso or Uij Restrained non-H Atoms ...            | 5 Report    |
| <a href="#">PLAT072_ALERT_2_G</a> | SHELXL First Parameter in WGHT Unusually Large              | 0.11 Report |
| <a href="#">PLAT171_ALERT_4_G</a> | The CIF-Embedded .res File Contains EADP Records            | 5 Report    |
| <a href="#">PLAT175_ALERT_4_G</a> | The CIF-Embedded .res File Contains SAME Records            | 2 Report    |
| <a href="#">PLAT178_ALERT_4_G</a> | The CIF-Embedded .res File Contains SIMU Records            | 1 Report    |
| <a href="#">PLAT187_ALERT_4_G</a> | The CIF-Embedded .res File Contains RIGU Records            | 1 Report    |
| <a href="#">PLAT302_ALERT_4_G</a> | Anion/Solvent/Minor-Residue Disorder (Resd 3 )              | 100% Note   |
| <a href="#">PLAT302_ALERT_4_G</a> | Anion/Solvent/Minor-Residue Disorder (Resd 4 )              | 100% Note   |
| <a href="#">PLAT304_ALERT_4_G</a> | Non-Integer Number of Atoms in ..... Resd 3                 | 9.74 Check  |
| <a href="#">PLAT304_ALERT_4_G</a> | Non-Integer Number of Atoms in ..... Resd 4                 | 5.26 Check  |
| <a href="#">PLAT720_ALERT_4_G</a> | Number of Unusual/Non-Standard Labels .....                 | 35 Note     |
| <a href="#">PLAT790_ALERT_4_G</a> | Centre of Gravity not Within Unit Cell: Resd. #<br>C4 H10 O | 3 Note      |
| <a href="#">PLAT790_ALERT_4_G</a> | Centre of Gravity not Within Unit Cell: Resd. #<br>C4 H10 O | 4 Note      |
| <a href="#">PLAT794_ALERT_5_G</a> | Tentative Bond Valency for Cu1 (II) .                       | 2.03 Info   |
| <a href="#">PLAT794_ALERT_5_G</a> | Tentative Bond Valency for Cu2 (II) .                       | 2.06 Info   |
| <a href="#">PLAT860_ALERT_3_G</a> | Number of Least-Squares Restraints .....                    | 66 Note     |
| <a href="#">PLAT883_ALERT_1_G</a> | No Info/Value for _atom_sites_solution_primary .            | Please Do ! |
| <a href="#">PLAT912_ALERT_4_G</a> | Missing # of FCF Reflections Above STh/L= 0.600             | 148 Note    |
| <a href="#">PLAT978_ALERT_2_G</a> | Number C-C Bonds with Positive Residual Density.            | 2 Info      |

- 
- 0 **ALERT level A** = Most likely a serious problem - resolve or explain  
0 **ALERT level B** = A potentially serious problem, consider carefully  
4 **ALERT level C** = Check. Ensure it is not caused by an omission or oversight  
20 **ALERT level G** = General information/check it is not something unexpected

- 1 **ALERT type 1** CIF construction/syntax error, inconsistent or missing data  
5 **ALERT type 2** Indicator that the structure model may be wrong or deficient  
4 **ALERT type 3** Indicator that the structure quality may be low  
12 **ALERT type 4** Improvement, methodology, query or suggestion  
2 **ALERT type 5** Informative message, check
-



It is advisable to attempt to resolve as many as possible of the alerts in all categories. Often the minor alerts point to easily fixed oversights, errors and omissions in your CIF or refinement strategy, so attention to these fine details can be worthwhile. In order to resolve some of the more serious problems it may be necessary to carry out additional measurements or structure refinements. However, the purpose of your study may justify the reported deviations and the more serious of these should normally be commented upon in the discussion or experimental section of a paper or in the "special\_details" fields of the CIF. checkCIF was carefully designed to identify outliers and unusual parameters, but every test has its limitations and alerts that are not important in a particular case may appear. Conversely, the absence of alerts does not guarantee there are no aspects of the results needing attention. It is up to the individual to critically assess their own results and, if necessary, seek expert advice.

### **Publication of your CIF in IUCr journals**

A basic structural check has been run on your CIF. These basic checks will be run on all CIFs submitted for publication in IUCr journals (*Acta Crystallographica*, *Journal of Applied Crystallography*, *Journal of Synchrotron Radiation*); however, if you intend to submit to *Acta Crystallographica Section C* or *E* or *IUCrData*, you should make sure that full publication checks are run on the final version of your CIF prior to submission.

### **Publication of your CIF in other journals**

Please refer to the *Notes for Authors* of the relevant journal for any special instructions relating to CIF submission.

---

**PLATON version of 07/08/2019; check.def file version of 30/07/2019**

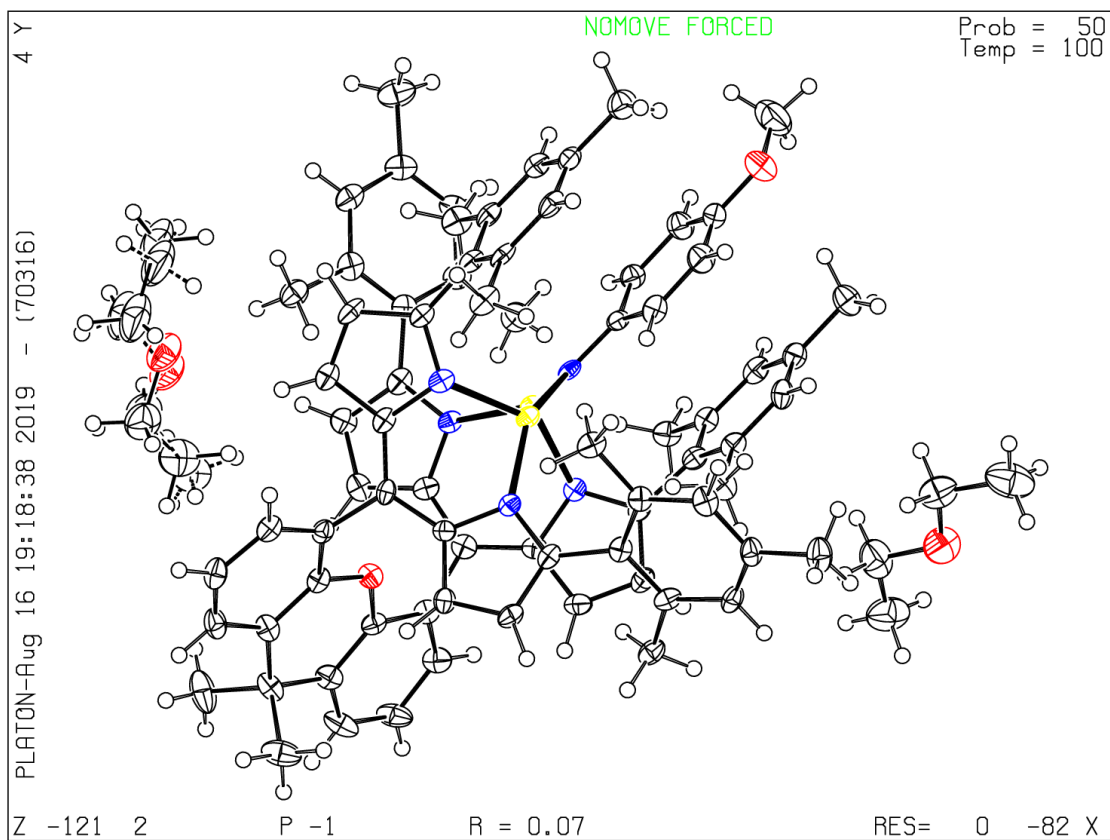

## checkCIF/PLATON report

Structure factors have been supplied for datablock(s) 3

THIS REPORT IS FOR GUIDANCE ONLY. IF USED AS PART OF A REVIEW PROCEDURE FOR PUBLICATION, IT SHOULD NOT REPLACE THE EXPERTISE OF AN EXPERIENCED CRYSTALLOGRAPHIC REFEREE.

No syntax errors found. [CIF dictionary](#) [Interpreting this report](#)

### Datablock: 3

---

Bond precision: C-C = 0.0036 A                      Wavelength=0.41328

Cell:                      a=23.7718(17)              b=21.0479(14)              c=17.5589(12)  
                            alpha=90                      beta=113.565(1)              gamma=90

Temperature:              100 K

|                        | Calculated                         | Reported            |
|------------------------|------------------------------------|---------------------|
| Volume                 | 8052.9(10)                         | 8052.9(10)          |
| Space group            | C 2/c                              | C 2/c               |
| Hall group             | -C 2yc                             | -C 2yc              |
| Moiety formula         | C77 H67 Cu2 F6 N5 O [+<br>solvent] | ?                   |
| Sum formula            | C77 H67 Cu2 F6 N5 O [+<br>solvent] | C77 H67 Cu2 F6 N5 O |
| Mr                     | 1319.46                            | 1319.43             |
| Dx, g cm <sup>-3</sup> | 1.088                              | 1.088               |
| Z                      | 4                                  | 4                   |
| Mu (mm <sup>-1</sup> ) | 0.142                              | 0.142               |
| F000                   | 2736.0                             | 2736.0              |
| F000'                  | 2737.56                            |                     |
| h,k,lmax               | 28,25,20                           | 28,25,20            |
| Nref                   | 7140                               | 7108                |
| Tmin,Tmax              | 0.985,0.990                        | 0.612,0.744         |
| Tmin'                  | 0.985                              |                     |

Correction method= # Reported T Limits: Tmin=0.612 Tmax=0.744  
AbsCorr = MULTI-SCAN

Data completeness= 0.996                      Theta(max)= 14.258

R(reflections)= 0.0393( 5465)              wR2(reflections)= 0.1034( 7108)

S = 1.050                      Npar= 430

---

The following ALERTS were generated. Each ALERT has the format

**test-name\_ALERT\_alert-type\_alert-level.**

Click on the hyperlinks for more details of the test.

---

**Alert level C**

|                                   |                                                  |        |           |
|-----------------------------------|--------------------------------------------------|--------|-----------|
| <a href="#">PLAT905_ALERT_3_C</a> | Negative K value in the Analysis of Variance ... | -1.333 | Report    |
| <a href="#">PLAT911_ALERT_3_C</a> | Missing FCF Refl Between Thmin & STh/L=          | 0.596  | 33 Report |

---

**Alert level G**

|                                   |                                                                                       |         |             |
|-----------------------------------|---------------------------------------------------------------------------------------|---------|-------------|
| <a href="#">ABSMU01_ALERT_1_G</a> | Calculation of _exptl_absorpt_correction_mu<br>not performed for this radiation type. |         |             |
| <a href="#">PLAT002_ALERT_2_G</a> | Number of Distance or Angle Restraints on AtSite                                      |         | 7 Note      |
| <a href="#">PLAT083_ALERT_2_G</a> | SHELXL Second Parameter in WGHT Unusually Large                                       | 5.96    | Why ?       |
| <a href="#">PLAT092_ALERT_4_G</a> | Check: Wavelength Given is not Cu,Ga,Mo,Ag,In Ka                                      | 0.41328 | Ang.        |
| <a href="#">PLAT128_ALERT_4_G</a> | Alternate Setting for Input Space Group C2/c                                          |         | I2/a Note   |
| <a href="#">PLAT171_ALERT_4_G</a> | The CIF-Embedded .res File Contains EADP Records                                      |         | 3 Report    |
| <a href="#">PLAT176_ALERT_4_G</a> | The CIF-Embedded .res File Contains SADI Records                                      |         | 2 Report    |
| <a href="#">PLAT230_ALERT_2_G</a> | Hirshfeld Test Diff for F1' --C40                                                     |         | 21.5 s.u.   |
| <a href="#">PLAT230_ALERT_2_G</a> | Hirshfeld Test Diff for F2' --C40                                                     |         | 30.0 s.u.   |
| <a href="#">PLAT230_ALERT_2_G</a> | Hirshfeld Test Diff for F3' --C40                                                     |         | 23.0 s.u.   |
| <a href="#">PLAT242_ALERT_2_G</a> | Low 'MainMol' Ueq as Compared to Neighbors of                                         |         | C40 Check   |
| <a href="#">PLAT301_ALERT_3_G</a> | Main Residue Disorder .....(Resd 1 )                                                  |         | 7% Note     |
| <a href="#">PLAT606_ALERT_4_G</a> | VERY LARGE Solvent Accessible VOID(S) in Structure                                    |         | ! Info      |
| <a href="#">PLAT794_ALERT_5_G</a> | Tentative Bond Valency for Cu1 (II)                                                   |         | 2.08 Info   |
| <a href="#">PLAT860_ALERT_3_G</a> | Number of Least-Squares Restraints .....                                              |         | 30 Note     |
| <a href="#">PLAT883_ALERT_1_G</a> | No Info/Value for _atom_sites_solution_primary                                        |         | Please Do ! |
| <a href="#">PLAT909_ALERT_3_G</a> | Percentage of I>2sig(I) Data at Theta(Max) Still                                      |         | 56% Note    |
| <a href="#">PLAT978_ALERT_2_G</a> | Number C-C Bonds with Positive Residual Density.                                      |         | 7 Info      |

- 
- 0 **ALERT level A** = Most likely a serious problem - resolve or explain  
0 **ALERT level B** = A potentially serious problem, consider carefully  
2 **ALERT level C** = Check. Ensure it is not caused by an omission or oversight  
18 **ALERT level G** = General information/check it is not something unexpected

- 2 ALERT type 1 CIF construction/syntax error, inconsistent or missing data  
7 ALERT type 2 Indicator that the structure model may be wrong or deficient  
5 ALERT type 3 Indicator that the structure quality may be low  
5 ALERT type 4 Improvement, methodology, query or suggestion  
1 ALERT type 5 Informative message, check
-

It is advisable to attempt to resolve as many as possible of the alerts in all categories. Often the minor alerts point to easily fixed oversights, errors and omissions in your CIF or refinement strategy, so attention to these fine details can be worthwhile. In order to resolve some of the more serious problems it may be necessary to carry out additional measurements or structure refinements. However, the purpose of your study may justify the reported deviations and the more serious of these should normally be commented upon in the discussion or experimental section of a paper or in the "special\_details" fields of the CIF. checkCIF was carefully designed to identify outliers and unusual parameters, but every test has its limitations and alerts that are not important in a particular case may appear. Conversely, the absence of alerts does not guarantee there are no aspects of the results needing attention. It is up to the individual to critically assess their own results and, if necessary, seek expert advice.

### **Publication of your CIF in IUCr journals**

A basic structural check has been run on your CIF. These basic checks will be run on all CIFs submitted for publication in IUCr journals (*Acta Crystallographica*, *Journal of Applied Crystallography*, *Journal of Synchrotron Radiation*); however, if you intend to submit to *Acta Crystallographica Section C* or *E* or *IUCrData*, you should make sure that full publication checks are run on the final version of your CIF prior to submission.

### **Publication of your CIF in other journals**

Please refer to the *Notes for Authors* of the relevant journal for any special instructions relating to CIF submission.

---

**PLATON version of 07/08/2019; check.def file version of 30/07/2019**

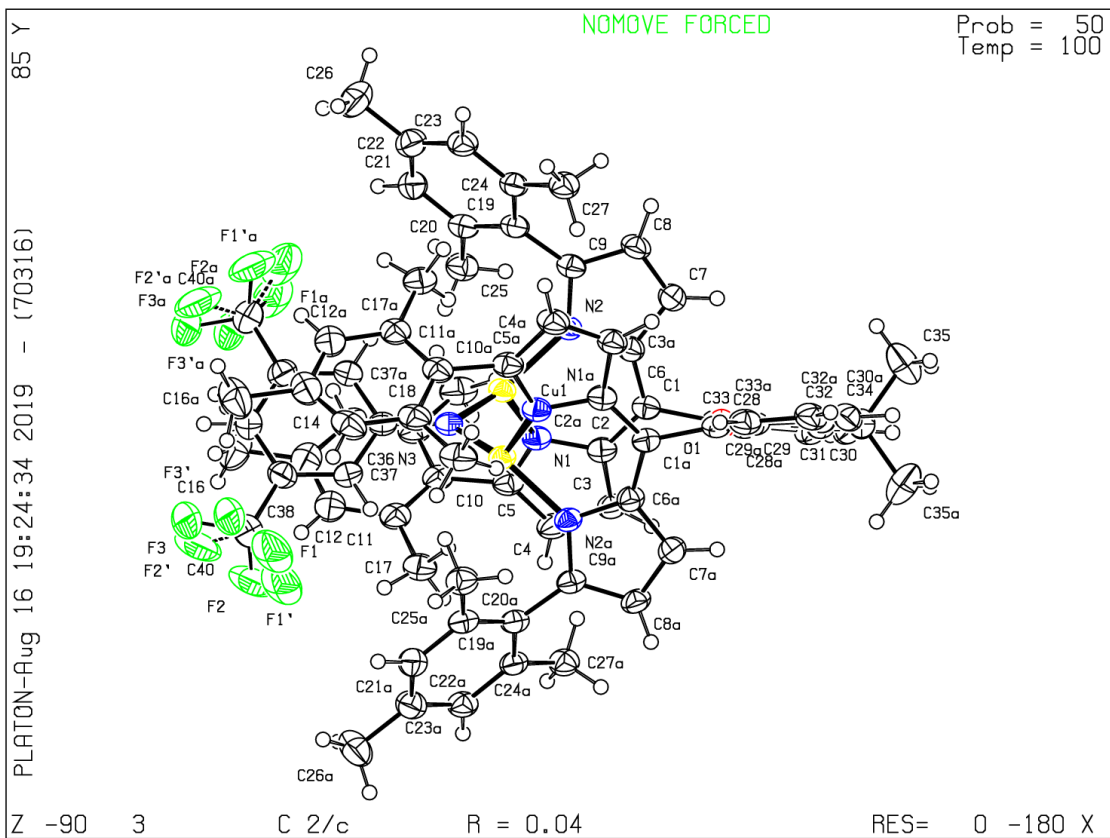

# checkCIF/PLATON report

Structure factors have been supplied for datablock(s) 5

THIS REPORT IS FOR GUIDANCE ONLY. IF USED AS PART OF A REVIEW PROCEDURE FOR PUBLICATION, IT SHOULD NOT REPLACE THE EXPERTISE OF AN EXPERIENCED CRYSTALLOGRAPHIC REFEREE.

No syntax errors found. [CIF dictionary](#) [Interpreting this report](#)

## Datablock: 5

---

|                        |                                                  |                                            |
|------------------------|--------------------------------------------------|--------------------------------------------|
| Bond precision:        | C-C = 0.0118 A                                   | Wavelength=0.71073                         |
| Cell:                  | a=21.9597(5)      b=22.7867(5)      c=21.3984(5) | alpha=90      beta=92.534(2)      gamma=90 |
| Temperature:           | 100 K                                            |                                            |
|                        | Calculated                                       | Reported                                   |
| Volume                 | 10697.1(4)                                       | 10697.1(4)                                 |
| Space group            | P 2/c                                            | P 2/c                                      |
| Hall group             | -P 2yc                                           | -P 2yc                                     |
| Moiety formula         | 8(C56 H63 Cu2 N5 O2), 4(C4 H10 O), 7(C2 H3 N)    | ?                                          |
| Sum formula            | C478 H565 Cu16 N47 O20                           | C59.75 H70.62 Cu2 N5.88 O2.50              |
| Mr                     | 8305.57                                          | 1038.17                                    |
| Dx, g cm <sup>-3</sup> | 1.289                                            | 1.289                                      |
| Z                      | 1                                                | 8                                          |
| Mu (mm <sup>-1</sup> ) | 0.844                                            | 0.844                                      |
| F000                   | 4386.0                                           | 4386.0                                     |
| F000'                  | 4392.35                                          |                                            |
| h,k,lmax               | 26,27,25                                         | 26,27,25                                   |
| Nref                   | 18916                                            | 18897                                      |
| Tmin,Tmax              | 0.765,0.834                                      | 0.589,0.745                                |
| Tmin'                  | 0.722                                            |                                            |

Correction method= # Reported T Limits: Tmin=0.589 Tmax=0.745  
AbsCorr = MULTI-SCAN

Data completeness= 0.999      Theta(max)= 25.027

R(reflections)= 0.0988( 12782)      wR2(reflections)= 0.2560( 18897)

S = 1.147      Npar= 1328

---

The following ALERTS were generated. Each ALERT has the format

**test-name\_ALERT\_alert-type\_alert-level.**

Click on the hyperlinks for more details of the test.

### ● Alert level C

|                                   |                                                  |              |
|-----------------------------------|--------------------------------------------------|--------------|
| <a href="#">PLAT041_ALERT_1_C</a> | Calc. and Reported SumFormula Strings Differ     | Please Check |
| <a href="#">PLAT084_ALERT_3_C</a> | High wR2 Value (i.e. > 0.25) .....               | 0.26 Report  |
| <a href="#">PLAT094_ALERT_2_C</a> | Ratio of Maximum / Minimum Residual Density .... | 2.55 Report  |
| <a href="#">PLAT243_ALERT_4_C</a> | High 'Solvent' Ueq as Compared to Neighbors of   | C5S Check    |
| <a href="#">PLAT244_ALERT_4_C</a> | Low 'Solvent' Ueq as Compared to Neighbors of    | C1S Check    |
| <a href="#">PLAT260_ALERT_2_C</a> | Large Average Ueq of Residue Including O2S       | 0.159 Check  |
| <a href="#">PLAT260_ALERT_2_C</a> | Large Average Ueq of Residue Including N1S       | 0.132 Check  |
| <a href="#">PLAT260_ALERT_2_C</a> | Large Average Ueq of Residue Including N2S       | 0.134 Check  |
| <a href="#">PLAT341_ALERT_3_C</a> | Low Bond Precision on C-C Bonds .....            | 0.01182 Ang. |
| <a href="#">PLAT906_ALERT_3_C</a> | Large K Value in the Analysis of Variance .....  | 6.254 Check  |
| <a href="#">PLAT911_ALERT_3_C</a> | Missing FCF Refl Between Thmin & STh/L= 0.595    | 16 Report    |
| <a href="#">PLAT971_ALERT_2_C</a> | Check Calcd Resid. Dens. 1.03A From Cu3          | 2.05 eA-3    |
| <a href="#">PLAT971_ALERT_2_C</a> | Check Calcd Resid. Dens. 1.01A From Cu4          | 2.01 eA-3    |
| <a href="#">PLAT971_ALERT_2_C</a> | Check Calcd Resid. Dens. 0.84A From N9           | 1.91 eA-3    |
| <a href="#">PLAT971_ALERT_2_C</a> | Check Calcd Resid. Dens. 1.05A From Cu1          | 1.84 eA-3    |
| <a href="#">PLAT971_ALERT_2_C</a> | Check Calcd Resid. Dens. 1.09A From Cu3          | 1.80 eA-3    |
| <a href="#">PLAT971_ALERT_2_C</a> | Check Calcd Resid. Dens. 1.00A From Cu2          | 1.70 eA-3    |
| <a href="#">PLAT971_ALERT_2_C</a> | Check Calcd Resid. Dens. 1.71A From Cu2          | 1.67 eA-3    |
| <a href="#">PLAT971_ALERT_2_C</a> | Check Calcd Resid. Dens. 1.05A From Cu4          | 1.66 eA-3    |
| <a href="#">PLAT971_ALERT_2_C</a> | Check Calcd Resid. Dens. 1.08A From Cu2          | 1.65 eA-3    |
| <a href="#">PLAT971_ALERT_2_C</a> | Check Calcd Resid. Dens. 1.09A From N6           | 1.64 eA-3    |
| <a href="#">PLAT971_ALERT_2_C</a> | Check Calcd Resid. Dens. 0.85A From N5           | 1.56 eA-3    |
| <a href="#">PLAT977_ALERT_2_C</a> | Check Negative Difference Density on H12B        | -0.44 eA-3   |
| <a href="#">PLAT978_ALERT_2_C</a> | Number C-C Bonds with Positive Residual Density. | 0 Info       |

### ● Alert level G

[CELLZ01\\_ALERT\\_1\\_G](#) Difference between formula and atom\_site contents detected.  
[CELLZ01\\_ALERT\\_1\\_G](#) ALERT: check formula stoichiometry or atom site occupancies.  
From the CIF: \_cell\_formula\_units\_Z 8  
From the CIF: \_chemical\_formula\_sum C59.75 H70.62 Cu2 N5.88 O2.50  
TEST: Compare cell contents of formula and atom\_site data

| atom | Z*formula | cif sites | diff  |
|------|-----------|-----------|-------|
| C    | 478.00    | 478.00    | 0.00  |
| H    | 564.96    | 565.00    | -0.04 |
| Cu   | 16.00     | 16.00     | 0.00  |
| N    | 47.04     | 47.00     | 0.04  |
| O    | 20.00     | 20.00     | 0.00  |

|                                   |                                                  |              |
|-----------------------------------|--------------------------------------------------|--------------|
| <a href="#">PLAT002_ALERT_2_G</a> | Number of Distance or Angle Restraints on AtSite | 14 Note      |
| <a href="#">PLAT003_ALERT_2_G</a> | Number of Uiso or Uij Restrained non-H Atoms ... | 8 Report     |
| <a href="#">PLAT045_ALERT_1_G</a> | Calculated and Reported Z Differ by a Factor ... | 0.13 Check   |
| <a href="#">PLAT083_ALERT_2_G</a> | SHELXL Second Parameter in WGHT Unusually Large  | 111.67 Why ? |
| <a href="#">PLAT175_ALERT_4_G</a> | The CIF-Embedded .res File Contains SAME Records | 2 Report     |
| <a href="#">PLAT176_ALERT_4_G</a> | The CIF-Embedded .res File Contains SADI Records | 2 Report     |
| <a href="#">PLAT178_ALERT_4_G</a> | The CIF-Embedded .res File Contains SIMU Records | 1 Report     |
| <a href="#">PLAT187_ALERT_4_G</a> | The CIF-Embedded .res File Contains RIGU Records | 2 Report     |
| <a href="#">PLAT300_ALERT_4_G</a> | Atom Site Occupancy of O2S Constrained at        | 0.5 Check    |
| <a href="#">PLAT300_ALERT_4_G</a> | Atom Site Occupancy of C11S Constrained at       | 0.5 Check    |
| <a href="#">PLAT300_ALERT_4_G</a> | Atom Site Occupancy of C12S Constrained at       | 0.5 Check    |
| <a href="#">PLAT300_ALERT_4_G</a> | Atom Site Occupancy of C13S Constrained at       | 0.5 Check    |
| <a href="#">PLAT300_ALERT_4_G</a> | Atom Site Occupancy of C14S Constrained at       | 0.5 Check    |
| <a href="#">PLAT300_ALERT_4_G</a> | Atom Site Occupancy of H11G Constrained at       | 0.5 Check    |
| <a href="#">PLAT300_ALERT_4_G</a> | Atom Site Occupancy of H11H Constrained at       | 0.5 Check    |
| <a href="#">PLAT300_ALERT_4_G</a> | Atom Site Occupancy of H11I Constrained at       | 0.5 Check    |



|                   |                                                  |                |       |             |
|-------------------|--------------------------------------------------|----------------|-------|-------------|
| PLAT300 ALERT 4 G | Atom Site Occupancy of H12A                      | Constrained at | 0.5   | Check       |
| PLAT300 ALERT 4 G | Atom Site Occupancy of H12B                      | Constrained at | 0.5   | Check       |
| PLAT300 ALERT 4 G | Atom Site Occupancy of H13A                      | Constrained at | 0.5   | Check       |
| PLAT300 ALERT 4 G | Atom Site Occupancy of H13B                      | Constrained at | 0.5   | Check       |
| PLAT300 ALERT 4 G | Atom Site Occupancy of H14A                      | Constrained at | 0.5   | Check       |
| PLAT300 ALERT 4 G | Atom Site Occupancy of H14B                      | Constrained at | 0.5   | Check       |
| PLAT300 ALERT 4 G | Atom Site Occupancy of H14C                      | Constrained at | 0.5   | Check       |
| PLAT300 ALERT 4 G | Atom Site Occupancy of N2S                       | Constrained at | 0.75  | Check       |
| PLAT300 ALERT 4 G | Atom Site Occupancy of C3S                       | Constrained at | 0.75  | Check       |
| PLAT300 ALERT 4 G | Atom Site Occupancy of C4S                       | Constrained at | 0.75  | Check       |
| PLAT300 ALERT 4 G | Atom Site Occupancy of H4SA                      | Constrained at | 0.75  | Check       |
| PLAT300 ALERT 4 G | Atom Site Occupancy of H4SB                      | Constrained at | 0.75  | Check       |
| PLAT300 ALERT 4 G | Atom Site Occupancy of H4SC                      | Constrained at | 0.75  | Check       |
| PLAT302 ALERT 4 G | Anion/Solvent/Minor-Residue Disorder (Resd 4 )   |                | 100%  | Note        |
| PLAT302 ALERT 4 G | Anion/Solvent/Minor-Residue Disorder (Resd 6 )   |                | 100%  | Note        |
| PLAT304 ALERT 4 G | Non-Integer Number of Atoms in ..... Resd 4      |                | 7.50  | Check       |
| PLAT304 ALERT 4 G | Non-Integer Number of Atoms in ..... Resd 6      |                | 4.50  | Check       |
| PLAT398 ALERT 2 G | Deviating C-O-C Angle From 120 for O2S           |                | 132.6 | Degree      |
| PLAT411 ALERT 2 G | Short Inter H...H Contact H12A ..H53             |                | 1.69  | Ang.        |
|                   | 1-x,1-y,1-z =                                    | 3_666          |       | Check       |
| PLAT413 ALERT 2 G | Short Inter XH3 .. XHn H11A ..H12B               |                | 2.01  | Ang.        |
|                   | x,1-y,-1/2+z =                                   | 4_565          |       | Check       |
| PLAT413 ALERT 2 G | Short Inter XH3 .. XHn H11C ..H12A               |                | 1.81  | Ang.        |
|                   | 1-x,1-y,1-z =                                    | 3_666          |       | Check       |
| PLAT413 ALERT 2 G | Short Inter XH3 .. XHn H14B ..H53                |                | 1.83  | Ang.        |
|                   | x,1-y,1/2+z =                                    | 4_566          |       | Check       |
| PLAT413 ALERT 2 G | Short Inter XH3 .. XHn H4SA ..H2SB               |                | 2.10  | Ang.        |
|                   | x,y,z =                                          | 1_555          |       | Check       |
| PLAT413 ALERT 2 G | Short Inter XH3 .. XHn H4SB ..H11A               |                | 2.01  | Ang.        |
|                   | x,1-y,1/2+z =                                    | 4_566          |       | Check       |
| PLAT720 ALERT 4 G | Number of Unusual/Non-Standard Labels .....      |                | 11    | Note        |
| PLAT722 ALERT 1 G | Angle Calc 108.00, Rep 109.50 Dev...             |                | 1.50  | Degree      |
|                   | H14A -C14S -H14C 1.555 1.555 1.555 #             | 538            |       | Check       |
| PLAT789 ALERT 4 G | Atoms with Negative _atom_site_disorder_group #  |                | 21    | Check       |
| PLAT794 ALERT 5 G | Tentative Bond Valency for Cu1 (II)              |                | 1.98  | Info        |
| PLAT794 ALERT 5 G | Tentative Bond Valency for Cu2 (II)              |                | 1.99  | Info        |
| PLAT794 ALERT 5 G | Tentative Bond Valency for Cu3 (II)              |                | 1.97  | Info        |
| PLAT794 ALERT 5 G | Tentative Bond Valency for Cu4 (II)              |                | 2.04  | Info        |
| PLAT860 ALERT 3 G | Number of Least-Squares Restraints .....         |                | 88    | Note        |
| PLAT883 ALERT 1 G | No Info/Value for _atom_sites_solution_primary   |                |       | Please Do ! |
| PLAT909 ALERT 3 G | Percentage of I>2sig(I) Data at Theta(Max) Still |                | 47%   | Note        |
| PLAT910 ALERT 3 G | Missing # of FCF Reflection(s) Below Theta(Min). |                | 4     | Note        |
| PLAT933 ALERT 2 G | Number of OMIT Records in Embedded .res File ... |                | 1     | Note        |

- 
- 0 **ALERT level A** = Most likely a serious problem - resolve or explain  
0 **ALERT level B** = A potentially serious problem, consider carefully  
24 **ALERT level C** = Check. Ensure it is not caused by an omission or oversight  
54 **ALERT level G** = General information/check it is not something unexpected
- 6 **ALERT type 1** CIF construction/syntax error, inconsistent or missing data  
28 **ALERT type 2** Indicator that the structure model may be wrong or deficient  
7 **ALERT type 3** Indicator that the structure quality may be low  
33 **ALERT type 4** Improvement, methodology, query or suggestion  
4 **ALERT type 5** Informative message, check
-

It is advisable to attempt to resolve as many as possible of the alerts in all categories. Often the minor alerts point to easily fixed oversights, errors and omissions in your CIF or refinement strategy, so attention to these fine details can be worthwhile. In order to resolve some of the more serious problems it may be necessary to carry out additional measurements or structure refinements. However, the purpose of your study may justify the reported deviations and the more serious of these should normally be commented upon in the discussion or experimental section of a paper or in the "special\_details" fields of the CIF. checkCIF was carefully designed to identify outliers and unusual parameters, but every test has its limitations and alerts that are not important in a particular case may appear. Conversely, the absence of alerts does not guarantee there are no aspects of the results needing attention. It is up to the individual to critically assess their own results and, if necessary, seek expert advice.

### **Publication of your CIF in IUCr journals**

A basic structural check has been run on your CIF. These basic checks will be run on all CIFs submitted for publication in IUCr journals (*Acta Crystallographica*, *Journal of Applied Crystallography*, *Journal of Synchrotron Radiation*); however, if you intend to submit to *Acta Crystallographica Section C* or *E* or *IUCrData*, you should make sure that full publication checks are run on the final version of your CIF prior to submission.

### **Publication of your CIF in other journals**

Please refer to the *Notes for Authors* of the relevant journal for any special instructions relating to CIF submission.

---

**PLATON version of 07/08/2019; check.def file version of 30/07/2019**

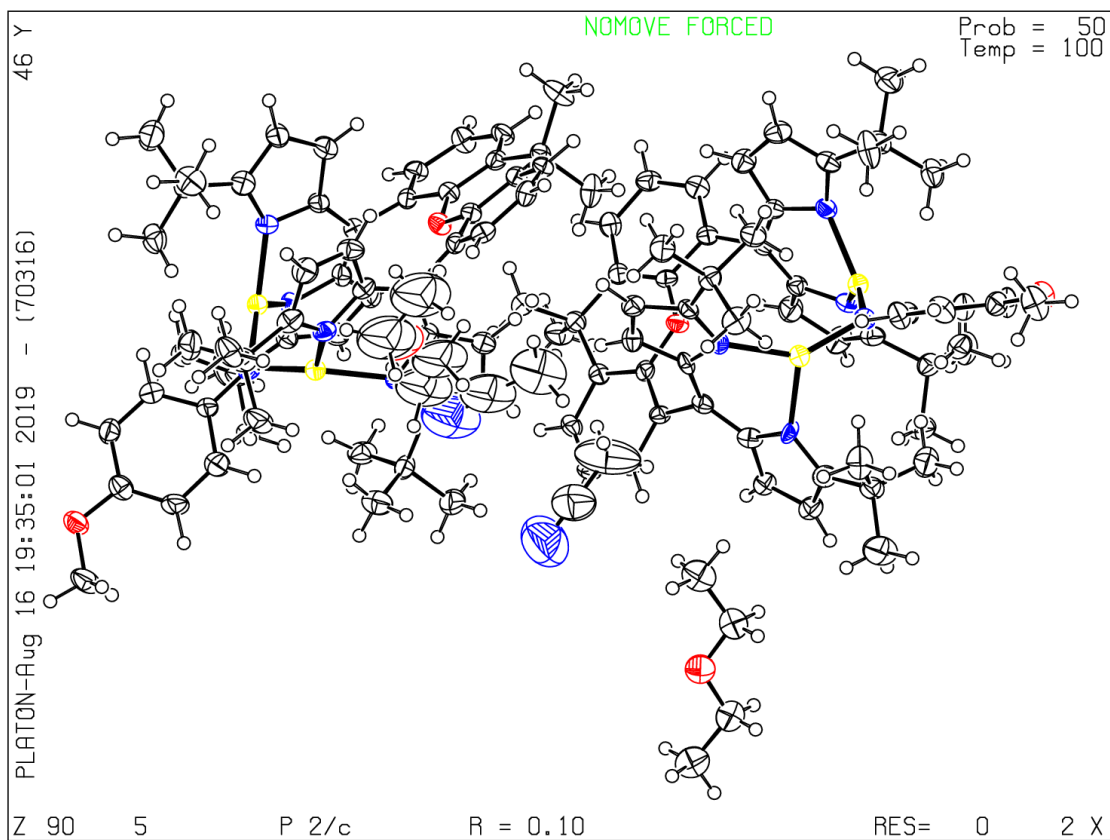

## checkCIF/PLATON report

Structure factors have been supplied for datablock(s) 6

THIS REPORT IS FOR GUIDANCE ONLY. IF USED AS PART OF A REVIEW PROCEDURE FOR PUBLICATION, IT SHOULD NOT REPLACE THE EXPERTISE OF AN EXPERIENCED CRYSTALLOGRAPHIC REFEREE.

No syntax errors found.

[CIF dictionary](#)

[Interpreting this report](#)

### Datablock: 6

---

Bond precision: C-C = 0.0137 A

Wavelength=0.71073

Cell: a=18.958(2) b=13.0693(16) c=43.638(5)  
alpha=90 beta=90 gamma=90  
Temperature: 100 K

|                        | Calculated                   | Reported            |
|------------------------|------------------------------|---------------------|
| Volume                 | 10812(2)                     | 10812(2)            |
| Space group            | P n a 21                     | P n a 21            |
| Hall group             | P 2c -2n                     | P 2c -2n            |
| Moiety formula         | C57 H59 Cu2 F6 N5 O, C2 H3 N | ?                   |
| Sum formula            | C59 H62 Cu2 F6 N6 O          | C59 H62 Cu2 F6 N6 O |
| Mr                     | 1112.25                      | 1112.22             |
| Dx, g cm <sup>-3</sup> | 1.367                        | 1.367               |
| Z                      | 8                            | 8                   |
| Mu (mm <sup>-1</sup> ) | 0.854                        | 0.854               |
| F000                   | 4624.0                       | 4624.0              |
| F000'                  | 4631.00                      |                     |
| h,k,lmax               | 22,15,52                     | 22,15,51            |
| Nref                   | 19298[ 9788]                 | 16866               |
| Tmin,Tmax              | 0.784,0.928                  | 0.650,0.801         |
| Tmin'                  | 0.745                        |                     |

Correction method= # Reported T Limits: Tmin=0.650 Tmax=0.801  
AbsCorr = MULTI-SCAN

Data completeness= 1.72/0.87      Theta(max)= 25.109

R(reflections)= 0.0538( 12888)      wR2(reflections)= 0.1329( 16866)

S = 1.038      Npar= 1397

---

The following ALERTS were generated. Each ALERT has the format

**test-name\_ALERT\_alert-type\_alert-level.**

Click on the hyperlinks for more details of the test.

### ● Alert level C

|                                   |                                                                                                                                                                            |              |
|-----------------------------------|----------------------------------------------------------------------------------------------------------------------------------------------------------------------------|--------------|
| <a href="#">STRVA01_ALERT_4_C</a> | Flack test results are ambiguous.<br>From the CIF: <code>_refine_ls_abs_structure_Flack</code> 0.656<br>From the CIF: <code>_refine_ls_abs_structure_Flack_su</code> 0.019 |              |
| <a href="#">PLAT090_ALERT_3_C</a> | Poor Data / Parameter Ratio (Zmax > 18) .....                                                                                                                              | 6.95 Note    |
| <a href="#">PLAT213_ALERT_2_C</a> | Atom F2B has ADP max/min Ratio .....                                                                                                                                       | 3.5 prolat   |
| <a href="#">PLAT213_ALERT_2_C</a> | Atom F2B' has ADP max/min Ratio .....                                                                                                                                      | 3.5 prolat   |
| <a href="#">PLAT213_ALERT_2_C</a> | Atom C41C has ADP max/min Ratio .....                                                                                                                                      | 3.6 oblate   |
| <a href="#">PLAT213_ALERT_2_C</a> | Atom C41B has ADP max/min Ratio .....                                                                                                                                      | 3.6 oblate   |
| <a href="#">PLAT213_ALERT_2_C</a> | Atom F3A has ADP max/min Ratio .....                                                                                                                                       | 3.5 prolat   |
| <a href="#">PLAT220_ALERT_2_C</a> | Non-Solvent Resd 2 C Ueq(max)/Ueq(min) Range                                                                                                                               | 4.2 Ratio    |
| <a href="#">PLAT234_ALERT_4_C</a> | Large Hirshfeld Difference F2B' --C56B .                                                                                                                                   | 0.21 Ang.    |
| <a href="#">PLAT234_ALERT_4_C</a> | Large Hirshfeld Difference F6B' --C57B .                                                                                                                                   | 0.19 Ang.    |
| <a href="#">PLAT234_ALERT_4_C</a> | Large Hirshfeld Difference C38B --C39B .                                                                                                                                   | 0.17 Ang.    |
| <a href="#">PLAT234_ALERT_4_C</a> | Large Hirshfeld Difference F5A --C57A .                                                                                                                                    | 0.17 Ang.    |
| <a href="#">PLAT244_ALERT_4_C</a> | Low 'Solvent' Ueq as Compared to Neighbors of                                                                                                                              | C3S Check    |
| <a href="#">PLAT341_ALERT_3_C</a> | Low Bond Precision on C-C Bonds .....                                                                                                                                      | 0.01369 Ang. |
| <a href="#">PLAT907_ALERT_2_C</a> | Flack x > 0.5, Structure Needs to be Inverted? .                                                                                                                           | 0.66 Check   |
| <a href="#">PLAT910_ALERT_3_C</a> | Missing # of FCF Reflection(s) Below Theta(Min).                                                                                                                           | 9 Note       |
| <a href="#">PLAT911_ALERT_3_C</a> | Missing FCF Refl Between Thmin & STh/L= 0.597                                                                                                                              | 72 Report    |
| <a href="#">PLAT915_ALERT_3_C</a> | No Flack x Check Done: Low Friedel Pair Coverage                                                                                                                           | 75 %         |
| <a href="#">PLAT978_ALERT_2_C</a> | Number C-C Bonds with Positive Residual Density.                                                                                                                           | 0 Info       |

### ● Alert level G

|                                   |                                                               |             |
|-----------------------------------|---------------------------------------------------------------|-------------|
| <a href="#">PLAT002_ALERT_2_G</a> | Number of Distance or Angle Restraints on AtSite              | 14 Note     |
| <a href="#">PLAT003_ALERT_2_G</a> | Number of Uiso or Uij Restrained non-H Atoms ...              | 21 Report   |
| <a href="#">PLAT083_ALERT_2_G</a> | SHELXL Second Parameter in WGHT Unusually Large               | 31.09 Why ? |
| <a href="#">PLAT171_ALERT_4_G</a> | The CIF-Embedded .res File Contains EADP Records              | 9 Report    |
| <a href="#">PLAT176_ALERT_4_G</a> | The CIF-Embedded .res File Contains SADI Records              | 4 Report    |
| <a href="#">PLAT178_ALERT_4_G</a> | The CIF-Embedded .res File Contains SIMU Records              | 3 Report    |
| <a href="#">PLAT230_ALERT_2_G</a> | Hirshfeld Test Diff for F1B' --C56B .                         | 8.7 s.u.    |
| <a href="#">PLAT242_ALERT_2_G</a> | Low 'MainMol' Ueq as Compared to Neighbors of                 | C56B Check  |
| <a href="#">PLAT242_ALERT_2_G</a> | Low 'MainMol' Ueq as Compared to Neighbors of                 | C57B Check  |
| <a href="#">PLAT242_ALERT_2_G</a> | Low 'MainMol' Ueq as Compared to Neighbors of                 | C56A Check  |
| <a href="#">PLAT242_ALERT_2_G</a> | Low 'MainMol' Ueq as Compared to Neighbors of                 | C57A Check  |
| <a href="#">PLAT301_ALERT_3_G</a> | Main Residue Disorder .....(Resd 1 )                          | 13% Note    |
| <a href="#">PLAT432_ALERT_2_G</a> | Short Inter X...Y Contact F2B' ..C3S                          | 2.93 Ang.   |
|                                   | x,y,z =                                                       | 1_555 Check |
| <a href="#">PLAT432_ALERT_2_G</a> | Short Inter X...Y Contact N2S ..C40B                          | 2.81 Ang.   |
|                                   | x,-1+y,z =                                                    | 1_545 Check |
| <a href="#">PLAT720_ALERT_4_G</a> | Number of Unusual/Non-Standard Labels .....                   | 30 Note     |
| <a href="#">PLAT794_ALERT_5_G</a> | Tentative Bond Valency for Cu1A (II) .                        | 2.01 Info   |
| <a href="#">PLAT794_ALERT_5_G</a> | Tentative Bond Valency for Cu2A (II) .                        | 2.08 Info   |
| <a href="#">PLAT860_ALERT_3_G</a> | Number of Least-Squares Restraints .....                      | 277 Note    |
| <a href="#">PLAT883_ALERT_1_G</a> | No Info/Value for <code>_atom_sites_solution_primary</code> . | Please Do ! |
| <a href="#">PLAT909_ALERT_3_G</a> | Percentage of I>2sig(I) Data at Theta(Max) Still              | 44% Note    |
| <a href="#">PLAT913_ALERT_3_G</a> | Missing # of Very Strong Reflections in FCF ....              | 1 Note      |

- 0 ALERT level A = Most likely a serious problem - resolve or explain  
0 ALERT level B = A potentially serious problem, consider carefully  
19 ALERT level C = Check. Ensure it is not caused by an omission or oversight  
21 ALERT level G = General information/check it is not something unexpected

1 ALERT type 1 CIF construction/syntax error, inconsistent or missing data

18 ALERT type 2 Indicator that the structure model may be wrong or deficient  
9 ALERT type 3 Indicator that the structure quality may be low  
10 ALERT type 4 Improvement, methodology, query or suggestion  
2 ALERT type 5 Informative message, check

---

---

It is advisable to attempt to resolve as many as possible of the alerts in all categories. Often the minor alerts point to easily fixed oversights, errors and omissions in your CIF or refinement strategy, so attention to these fine details can be worthwhile. In order to resolve some of the more serious problems it may be necessary to carry out additional measurements or structure refinements. However, the purpose of your study may justify the reported deviations and the more serious of these should normally be commented upon in the discussion or experimental section of a paper or in the "special\_details" fields of the CIF. checkCIF was carefully designed to identify outliers and unusual parameters, but every test has its limitations and alerts that are not important in a particular case may appear. Conversely, the absence of alerts does not guarantee there are no aspects of the results needing attention. It is up to the individual to critically assess their own results and, if necessary, seek expert advice.

### **Publication of your CIF in IUCr journals**

A basic structural check has been run on your CIF. These basic checks will be run on all CIFs submitted for publication in IUCr journals (*Acta Crystallographica*, *Journal of Applied Crystallography*, *Journal of Synchrotron Radiation*); however, if you intend to submit to *Acta Crystallographica Section C* or *E* or *IUCrData*, you should make sure that **full publication checks** are run on the final version of your CIF prior to submission.

### **Publication of your CIF in other journals**

Please refer to the *Notes for Authors* of the relevant journal for any special instructions relating to CIF submission.

---

**PLATON version of 07/08/2019; check.def file version of 30/07/2019**

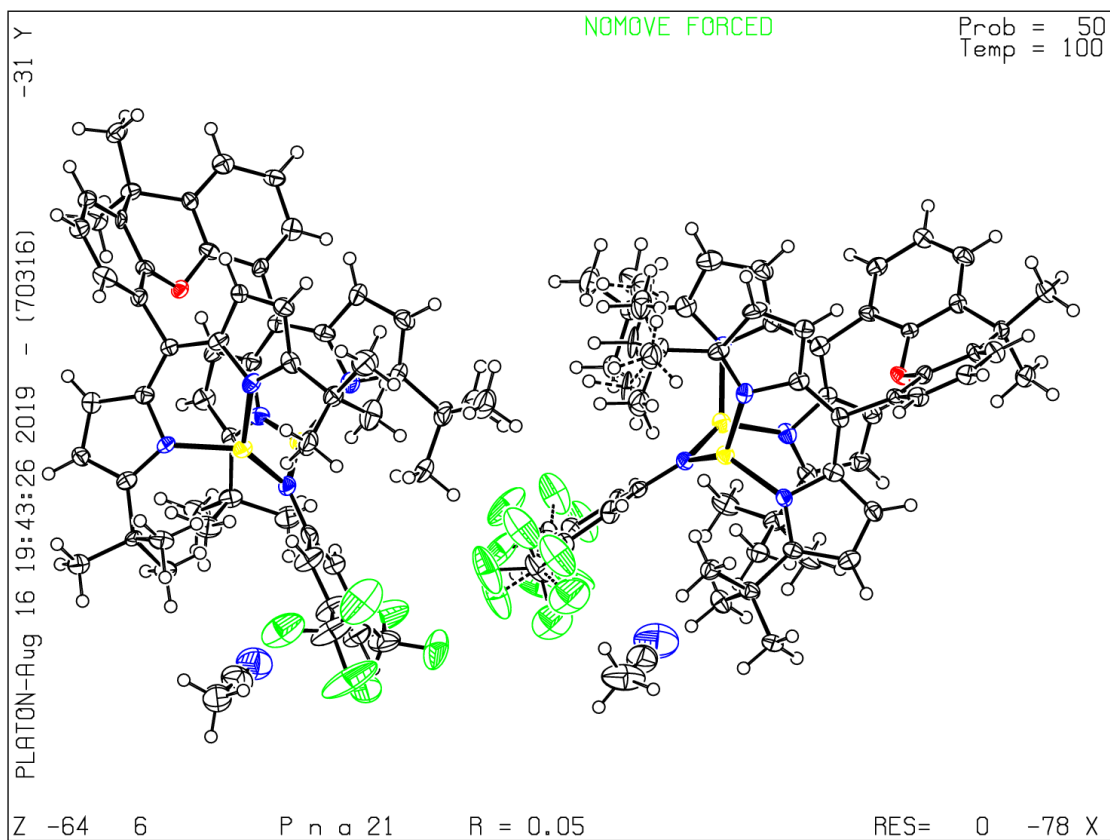

## checkCIF/PLATON report

Structure factors have been supplied for datablock(s) 7

THIS REPORT IS FOR GUIDANCE ONLY. IF USED AS PART OF A REVIEW PROCEDURE FOR PUBLICATION, IT SHOULD NOT REPLACE THE EXPERTISE OF AN EXPERIENCED CRYSTALLOGRAPHIC REFEREE.

No syntax errors found. [CIF dictionary](#) [Interpreting this report](#)

### Datablock: 7

---

Bond precision: C-C = 0.0050 A                      Wavelength=1.54184

Cell:                      a=17.7584(2)              b=26.2650(3)              c=24.6763(3)  
                            alpha=90                      beta=105.2606(12)              gamma=90

Temperature:              100 K

|                        | Calculated                                        | Reported             |
|------------------------|---------------------------------------------------|----------------------|
| Volume                 | 11103.8(2)                                        | 11103.8(2)           |
| Space group            | P 21/c                                            | P 21/c               |
| Hall group             | -P 2ybc                                           | -P 2ybc              |
| Moiety formula         | C76 H71 Cu2 N5 O2, C18 H36<br>K N2 O6 [+ solvent] | ?                    |
| Sum formula            | C94 H107 Cu2 K N7 O8 [+<br>solvent]               | C94 H107 Cu2 K N7 O8 |
| Mr                     | 1629.07                                           | 1629.04              |
| Dx, g cm <sup>-3</sup> | 0.975                                             | 0.974                |
| Z                      | 4                                                 | 4                    |
| Mu (mm <sup>-1</sup> ) | 1.171                                             | 1.171                |
| F000                   | 3444.0                                            | 3444.0               |
| F000'                  | 3438.50                                           |                      |
| h,k,lmax               | 21,31,29                                          | 21,31,29             |
| Nref                   | 19610                                             | 19446                |
| Tmin,Tmax              | 0.827,0.871                                       | 0.598,0.753          |
| Tmin'                  | 0.672                                             |                      |

Correction method= # Reported T Limits: Tmin=0.598 Tmax=0.753  
AbsCorr = MULTI-SCAN

Data completeness= 0.992                      Theta(max)= 66.600

R(reflections)= 0.0639( 14353)              wR2(reflections)= 0.1836( 19446)

S = 1.020                      Npar= 1024

---



The following ALERTS were generated. Each ALERT has the format

**test-name\_ALERT\_alert-type\_alert-level.**

Click on the hyperlinks for more details of the test.

---

● **Alert level C**

|                                   |                                                  |            |
|-----------------------------------|--------------------------------------------------|------------|
| <a href="#">PLAT230_ALERT_2_C</a> | Hirshfeld Test Diff for C72 --C73 .              | 5.3 s.u.   |
| <a href="#">PLAT230_ALERT_2_C</a> | Hirshfeld Test Diff for C73 --C74 .              | 6.0 s.u.   |
| <a href="#">PLAT911_ALERT_3_C</a> | Missing FCF Refl Between Thmin & STh/L= 0.595    | 165 Report |
| <a href="#">PLAT978_ALERT_2_C</a> | Number C-C Bonds with Positive Residual Density. | 0 Info     |

---

● **Alert level G**

|                                   |                                                    |             |
|-----------------------------------|----------------------------------------------------|-------------|
| <a href="#">PLAT072_ALERT_2_G</a> | SHELXL First Parameter in WGHT Unusually Large     | 0.11 Report |
| <a href="#">PLAT606_ALERT_4_G</a> | VERY LARGE Solvent Accessible VOID(S) in Structure | ! Info      |
| <a href="#">PLAT794_ALERT_5_G</a> | Tentative Bond Valency for Cu1 (I) .               | 0.95 Info   |
| <a href="#">PLAT794_ALERT_5_G</a> | Tentative Bond Valency for Cu2 (I) .               | 0.95 Info   |
| <a href="#">PLAT883_ALERT_1_G</a> | No Info/Value for _atom_sites_solution_primary .   | Please Do ! |
| <a href="#">PLAT909_ALERT_3_G</a> | Percentage of I>2sig(I) Data at Theta(Max) Still   | 55% Note    |
| <a href="#">PLAT933_ALERT_2_G</a> | Number of OMIT Records in Embedded .res File ...   | 4 Note      |
| <a href="#">PLAT992_ALERT_5_G</a> | Repd & Actual _reflns_number_gt Values Differ by   | 1 Check     |

- 
- 0 **ALERT level A** = Most likely a serious problem - resolve or explain  
0 **ALERT level B** = A potentially serious problem, consider carefully  
4 **ALERT level C** = Check. Ensure it is not caused by an omission or oversight  
8 **ALERT level G** = General information/check it is not something unexpected

- 1 ALERT type 1 CIF construction/syntax error, inconsistent or missing data  
5 ALERT type 2 Indicator that the structure model may be wrong or deficient  
2 ALERT type 3 Indicator that the structure quality may be low  
1 ALERT type 4 Improvement, methodology, query or suggestion  
3 ALERT type 5 Informative message, check
- 
-

It is advisable to attempt to resolve as many as possible of the alerts in all categories. Often the minor alerts point to easily fixed oversights, errors and omissions in your CIF or refinement strategy, so attention to these fine details can be worthwhile. In order to resolve some of the more serious problems it may be necessary to carry out additional measurements or structure refinements. However, the purpose of your study may justify the reported deviations and the more serious of these should normally be commented upon in the discussion or experimental section of a paper or in the "special\_details" fields of the CIF. checkCIF was carefully designed to identify outliers and unusual parameters, but every test has its limitations and alerts that are not important in a particular case may appear. Conversely, the absence of alerts does not guarantee there are no aspects of the results needing attention. It is up to the individual to critically assess their own results and, if necessary, seek expert advice.

### **Publication of your CIF in IUCr journals**

A basic structural check has been run on your CIF. These basic checks will be run on all CIFs submitted for publication in IUCr journals (*Acta Crystallographica*, *Journal of Applied Crystallography*, *Journal of Synchrotron Radiation*); however, if you intend to submit to *Acta Crystallographica Section C* or *E* or *IUCrData*, you should make sure that full publication checks are run on the final version of your CIF prior to submission.

### **Publication of your CIF in other journals**

Please refer to the *Notes for Authors* of the relevant journal for any special instructions relating to CIF submission.

---

**PLATON version of 07/08/2019; check.def file version of 30/07/2019**

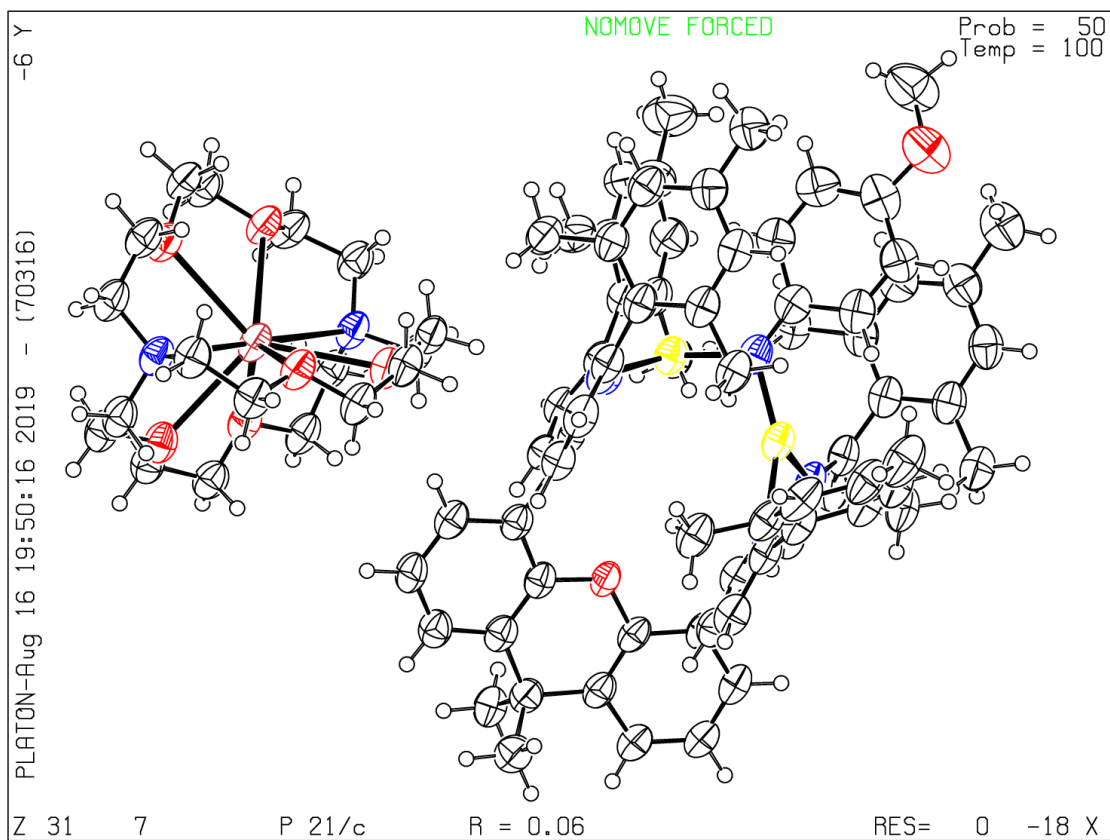

## checkCIF/PLATON report

Structure factors have been supplied for datablock(s) 8

THIS REPORT IS FOR GUIDANCE ONLY. IF USED AS PART OF A REVIEW PROCEDURE FOR PUBLICATION, IT SHOULD NOT REPLACE THE EXPERTISE OF AN EXPERIENCED CRYSTALLOGRAPHIC REFEREE.

No syntax errors found. [CIF dictionary](#) [Interpreting this report](#)

### Datablock: 8

---

|                        |                                                             |                                             |
|------------------------|-------------------------------------------------------------|---------------------------------------------|
| Bond precision:        | C-C = 0.0034 A                                              | Wavelength=0.71073                          |
| Cell:                  | a=17.164(3)      b=18.401(3)      c=27.309(4)               | alpha=90      beta=104.668(4)      gamma=90 |
| Temperature:           | 100 K                                                       |                                             |
|                        | Calculated                                                  | Reported                                    |
| Volume                 | 8344(2)                                                     | 8344(2)                                     |
| Space group            | P 21/n                                                      | P 21/n                                      |
| Hall group             | -P 2yn                                                      | -P 2yn                                      |
| Moiety formula         | 4(C56 H63 Cu2 N5 O2),<br>4(C18 H36 K N2 O6), 7(C4<br>H10 O) | ?                                           |
| Sum formula            | C324 H466 Cu8 K4 N28 O39                                    | C81 H116.50 Cu2 K N7 O9.75                  |
| Mr                     | 6042.05                                                     | 1510.48                                     |
| Dx, g cm <sup>-3</sup> | 1.202                                                       | 1.202                                       |
| Z                      | 1                                                           | 4                                           |
| Mu (mm <sup>-1</sup> ) | 0.617                                                       | 0.617                                       |
| F000                   | 3226.0                                                      | 3226.0                                      |
| F000'                  | 3230.47                                                     |                                             |
| h,k,lmax               | 20,21,32                                                    | 20,21,32                                    |
| Nref                   | 14787                                                       | 14724                                       |
| Tmin,Tmax              | 0.709,0.807                                                 | 0.614,0.745                                 |
| Tmin'                  | 0.534                                                       |                                             |

Correction method= # Reported T Limits: Tmin=0.614 Tmax=0.745  
AbsCorr = MULTI-SCAN

Data completeness= 0.996      Theta(max)= 25.057

R(reflections)= 0.0370( 11890)      wR2(reflections)= 0.1035( 14724)

S = 1.043      Npar= 988

---

The following ALERTS were generated. Each ALERT has the format

**test-name\_ALERT\_alert-type\_alert-level.**

Click on the hyperlinks for more details of the test.

---

● **Alert level C**

|                                   |                                                  |       |       |        |
|-----------------------------------|--------------------------------------------------|-------|-------|--------|
| <a href="#">PLAT260_ALERT_2_C</a> | Large Average Ueq of Residue Including           | O2S   | 0.101 | Check  |
| <a href="#">PLAT260_ALERT_2_C</a> | Large Average Ueq of Residue Including           | O2T   | 0.101 | Check  |
| <a href="#">PLAT911_ALERT_3_C</a> | Missing FCF Refl Between Thmin & STh/L=          | 0.596 | 62    | Report |
| <a href="#">PLAT918_ALERT_3_C</a> | Reflection(s) with I(obs) much Smaller I(calc) . |       | 1     | Check  |

---

● **Alert level G**

|                                   |                                                  |  |       |             |
|-----------------------------------|--------------------------------------------------|--|-------|-------------|
| <a href="#">PLAT002_ALERT_2_G</a> | Number of Distance or Angle Restraints on AtSite |  | 29    | Note        |
| <a href="#">PLAT003_ALERT_2_G</a> | Number of Uiso or Uij Restrained non-H Atoms ... |  | 5     | Report      |
| <a href="#">PLAT045_ALERT_1_G</a> | Calculated and Reported Z Differ by a Factor ... |  | 0.25  | Check       |
| <a href="#">PLAT063_ALERT_4_G</a> | Crystal Size Likely too Large for Beam Size .... |  | 1.00  | mm          |
| <a href="#">PLAT083_ALERT_2_G</a> | SHELXL Second Parameter in WGHT Unusually Large  |  | 6.18  | Why ?       |
| <a href="#">PLAT171_ALERT_4_G</a> | The CIF-Embedded .res File Contains EADP Records |  | 10    | Report      |
| <a href="#">PLAT175_ALERT_4_G</a> | The CIF-Embedded .res File Contains SAME Records |  | 2     | Report      |
| <a href="#">PLAT176_ALERT_4_G</a> | The CIF-Embedded .res File Contains SADI Records |  | 4     | Report      |
| <a href="#">PLAT187_ALERT_4_G</a> | The CIF-Embedded .res File Contains RIGU Records |  | 1     | Report      |
| <a href="#">PLAT230_ALERT_2_G</a> | Hirshfeld Test Diff for C38 --C39 .              |  | 12.5  | s.u.        |
| <a href="#">PLAT230_ALERT_2_G</a> | Hirshfeld Test Diff for C38 --C40 .              |  | 6.0   | s.u.        |
| <a href="#">PLAT301_ALERT_3_G</a> | Main Residue Disorder .....(Resd 1 )             |  | 9%    | Note        |
| <a href="#">PLAT302_ALERT_4_G</a> | Anion/Solvent/Minor-Residue Disorder (Resd 4 )   |  | 100%  | Note        |
| <a href="#">PLAT302_ALERT_4_G</a> | Anion/Solvent/Minor-Residue Disorder (Resd 5 )   |  | 100%  | Note        |
| <a href="#">PLAT304_ALERT_4_G</a> | Non-Integer Number of Atoms in ..... Resd 4      |  | 5.65  | Check       |
| <a href="#">PLAT304_ALERT_4_G</a> | Non-Integer Number of Atoms in ..... Resd 5      |  | 5.60  | Check       |
| <a href="#">PLAT398_ALERT_2_G</a> | Deviating C-O-C Angle From 120 for O2T           |  | 107.3 | Degree      |
| <a href="#">PLAT720_ALERT_4_G</a> | Number of Unusual/Non-Standard Labels .....      |  | 30    | Note        |
| <a href="#">PLAT794_ALERT_5_G</a> | Tentative Bond Valency for Cul (I)               |  | 0.90  | Info        |
| <a href="#">PLAT860_ALERT_3_G</a> | Number of Least-Squares Restraints .....         |  | 102   | Note        |
| <a href="#">PLAT883_ALERT_1_G</a> | No Info/Value for _atom_sites_solution_primary . |  |       | Please Do ! |
| <a href="#">PLAT909_ALERT_3_G</a> | Percentage of I>2sig(I) Data at Theta(Max) Still |  | 63%   | Note        |
| <a href="#">PLAT910_ALERT_3_G</a> | Missing # of FCF Reflection(s) Below Theta(Min). |  | 1     | Note        |
| <a href="#">PLAT933_ALERT_2_G</a> | Number of OMIT Records in Embedded .res File ... |  | 7     | Note        |
| <a href="#">PLAT978_ALERT_2_G</a> | Number C-C Bonds with Positive Residual Density. |  | 6     | Info        |

---

0 **ALERT level A** = Most likely a serious problem - resolve or explain  
0 **ALERT level B** = A potentially serious problem, consider carefully  
4 **ALERT level C** = Check. Ensure it is not caused by an omission or oversight  
25 **ALERT level G** = General information/check it is not something unexpected

2 **ALERT type 1** CIF construction/syntax error, inconsistent or missing data  
10 **ALERT type 2** Indicator that the structure model may be wrong or deficient  
6 **ALERT type 3** Indicator that the structure quality may be low  
10 **ALERT type 4** Improvement, methodology, query or suggestion  
1 **ALERT type 5** Informative message, check

---

It is advisable to attempt to resolve as many as possible of the alerts in all categories. Often the minor alerts point to easily fixed oversights, errors and omissions in your CIF or refinement strategy, so attention to these fine details can be worthwhile. In order to resolve some of the more serious problems it may be necessary to carry out additional measurements or structure refinements. However, the purpose of your study may justify the reported deviations and the more serious of these should normally be commented upon in the discussion or experimental section of a paper or in the "special\_details" fields of the CIF. checkCIF was carefully designed to identify outliers and unusual parameters, but every test has its limitations and alerts that are not important in a particular case may appear. Conversely, the absence of alerts does not guarantee there are no aspects of the results needing attention. It is up to the individual to critically assess their own results and, if necessary, seek expert advice.

### **Publication of your CIF in IUCr journals**

A basic structural check has been run on your CIF. These basic checks will be run on all CIFs submitted for publication in IUCr journals (*Acta Crystallographica*, *Journal of Applied Crystallography*, *Journal of Synchrotron Radiation*); however, if you intend to submit to *Acta Crystallographica Section C* or *E* or *IUCrData*, you should make sure that full publication checks are run on the final version of your CIF prior to submission.

### **Publication of your CIF in other journals**

Please refer to the *Notes for Authors* of the relevant journal for any special instructions relating to CIF submission.

---

**PLATON version of 07/08/2019; check.def file version of 30/07/2019**

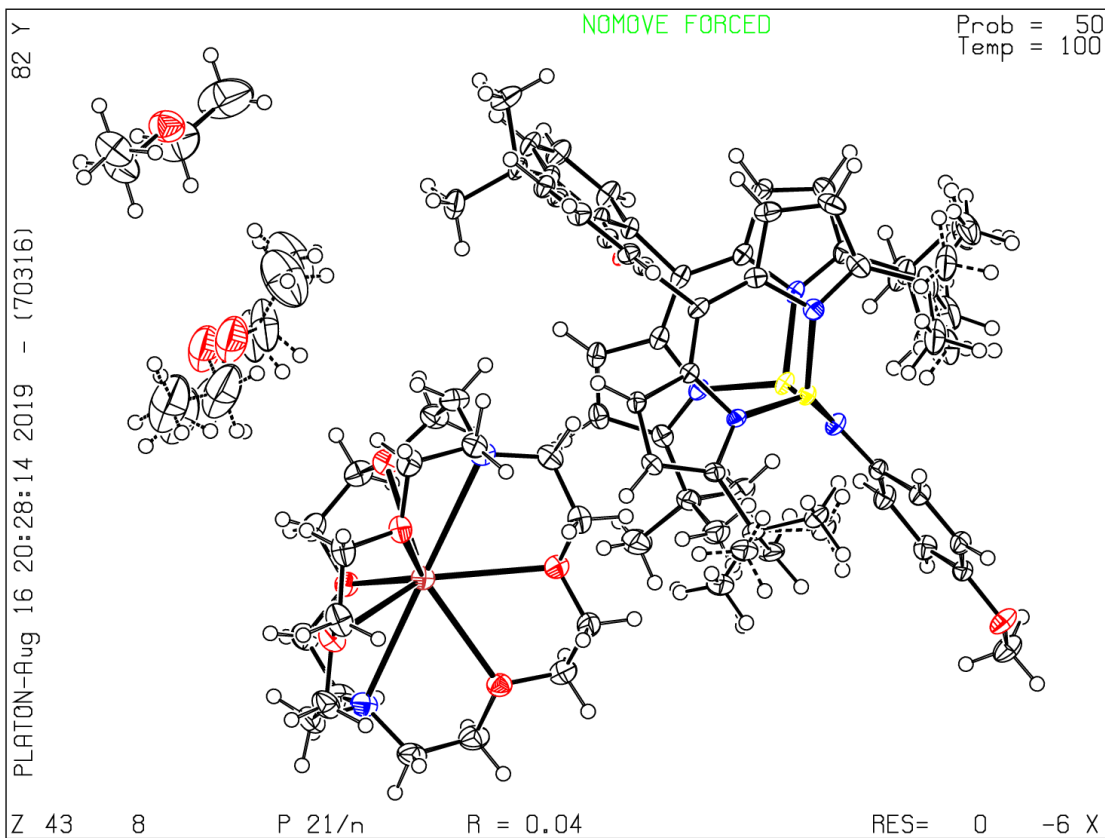

# checkCIF/PLATON report

Structure factors have been supplied for datablock(s) 9

THIS REPORT IS FOR GUIDANCE ONLY. IF USED AS PART OF A REVIEW PROCEDURE FOR PUBLICATION, IT SHOULD NOT REPLACE THE EXPERTISE OF AN EXPERIENCED CRYSTALLOGRAPHIC REFEREE.

No syntax errors found. [CIF dictionary](#) [Interpreting this report](#)

## Datablock: 9

---

|                 |                                         |                               |                         |
|-----------------|-----------------------------------------|-------------------------------|-------------------------|
| Bond precision: | C-C = 0.0038 A                          | Wavelength=0.71073            |                         |
| Cell:           | a=13.347(2)<br>alpha=90                 | b=41.261(6)<br>beta=97.390(3) | c=13.763(2)<br>gamma=90 |
| Temperature:    | 100 K                                   |                               |                         |
|                 | Calculated                              | Reported                      |                         |
| Volume          | 7516.5(19)                              | 7516(2)                       |                         |
| Space group     | P 21/n                                  | P 21/n                        |                         |
| Hall group      | -P 2yn                                  | -P 2yn                        |                         |
| Moiety formula  | C57 H59 Cu2 F6 N5 O, C18<br>H36 K N2 O6 | ?                             |                         |
| Sum formula     | C75 H95 Cu2 F6 K N7 O7                  | C75 H95 Cu2 F6 K N7 O7        |                         |
| Mr              | 1486.78                                 | 1486.75                       |                         |
| Dx, g cm-3      | 1.314                                   | 1.314                         |                         |
| Z               | 4                                       | 4                             |                         |
| Mu (mm-1)       | 0.692                                   | 0.692                         |                         |
| F000            | 3124.0                                  | 3124.0                        |                         |
| F000'           | 3128.70                                 |                               |                         |
| h,k,lmax        | 15,49,16                                | 15,49,16                      |                         |
| Nref            | 13333                                   | 13315                         |                         |
| Tmin,Tmax       | 0.723,0.853                             | 0.560,0.745                   |                         |
| Tmin'           | 0.496                                   |                               |                         |

Correction method= # Reported T Limits: Tmin=0.560 Tmax=0.745  
AbsCorr = MULTI-SCAN

Data completeness= 0.999                      Theta(max)= 25.064

R(reflections)= 0.0402( 10685)              wR2(reflections)= 0.0932( 13315)

S = 1.012                                      Npar= 920

---



The following ALERTS were generated. Each ALERT has the format

**test-name\_ALERT\_alert-type\_alert-level.**

Click on the hyperlinks for more details of the test.

---

**Alert level C**

|                                   |                                                 |             |
|-----------------------------------|-------------------------------------------------|-------------|
| <a href="#">PLAT220_ALERT_2_C</a> | Non-Solvent Resd 1 C Ueq(max)/Ueq(min) Range    | 4.5 Ratio   |
| <a href="#">PLAT222_ALERT_3_C</a> | Non-Solv. Resd 1 H Uiso(max)/Uiso(min) Range    | 4.7 Ratio   |
| <a href="#">PLAT906_ALERT_3_C</a> | Large K Value in the Analysis of Variance ..... | 2.111 Check |
| <a href="#">PLAT911_ALERT_3_C</a> | Missing FCF Refl Between Thmin & STh/L= 0.596   | 18 Report   |

---

**Alert level G**

|                                   |                                                  |             |
|-----------------------------------|--------------------------------------------------|-------------|
| <a href="#">PLAT002_ALERT_2_G</a> | Number of Distance or Angle Restraints on AtSite | 14 Note     |
| <a href="#">PLAT063_ALERT_4_G</a> | Crystal Size Likely too Large for Beam Size ...  | 1.00 mm     |
| <a href="#">PLAT083_ALERT_2_G</a> | SHELXL Second Parameter in WGHT Unusually Large  | 10.04 Why ? |
| <a href="#">PLAT171_ALERT_4_G</a> | The CIF-Embedded .res File Contains EADP Records | 6 Report    |
| <a href="#">PLAT176_ALERT_4_G</a> | The CIF-Embedded .res File Contains SADI Records | 3 Report    |
| <a href="#">PLAT230_ALERT_2_G</a> | Hirshfeld Test Diff for F6 --C57 .               | 7.0 s.u.    |
| <a href="#">PLAT230_ALERT_2_G</a> | Hirshfeld Test Diff for F4' --C57 .              | 20.5 s.u.   |
| <a href="#">PLAT230_ALERT_2_G</a> | Hirshfeld Test Diff for F5' --C57 .              | 18.0 s.u.   |
| <a href="#">PLAT230_ALERT_2_G</a> | Hirshfeld Test Diff for F6' --C57 .              | 27.0 s.u.   |
| <a href="#">PLAT242_ALERT_2_G</a> | Low 'MainMol' Ueq as Compared to Neighbors of    | C56 Check   |
| <a href="#">PLAT242_ALERT_2_G</a> | Low 'MainMol' Ueq as Compared to Neighbors of    | C57 Check   |
| <a href="#">PLAT301_ALERT_3_G</a> | Main Residue Disorder .....(Resd 1 )             | 8% Note     |
| <a href="#">PLAT860_ALERT_3_G</a> | Number of Least-Squares Restraints .....         | 45 Note     |
| <a href="#">PLAT883_ALERT_1_G</a> | No Info/Value for _atom_sites_solution_primary . | Please Do ! |
| <a href="#">PLAT909_ALERT_3_G</a> | Percentage of I>2sig(I) Data at Theta(Max) Still | 63% Note    |
| <a href="#">PLAT978_ALERT_2_G</a> | Number C-C Bonds with Positive Residual Density. | 6 Info      |

---

0 **ALERT level A** = Most likely a serious problem - resolve or explain  
0 **ALERT level B** = A potentially serious problem, consider carefully  
4 **ALERT level C** = Check. Ensure it is not caused by an omission or oversight  
16 **ALERT level G** = General information/check it is not something unexpected

1 ALERT type 1 CIF construction/syntax error, inconsistent or missing data  
10 ALERT type 2 Indicator that the structure model may be wrong or deficient  
6 ALERT type 3 Indicator that the structure quality may be low  
3 ALERT type 4 Improvement, methodology, query or suggestion  
0 ALERT type 5 Informative message, check

---

It is advisable to attempt to resolve as many as possible of the alerts in all categories. Often the minor alerts point to easily fixed oversights, errors and omissions in your CIF or refinement strategy, so attention to these fine details can be worthwhile. In order to resolve some of the more serious problems it may be necessary to carry out additional measurements or structure refinements. However, the purpose of your study may justify the reported deviations and the more serious of these should normally be commented upon in the discussion or experimental section of a paper or in the "special\_details" fields of the CIF. checkCIF was carefully designed to identify outliers and unusual parameters, but every test has its limitations and alerts that are not important in a particular case may appear. Conversely, the absence of alerts does not guarantee there are no aspects of the results needing attention. It is up to the individual to critically assess their own results and, if necessary, seek expert advice.

### **Publication of your CIF in IUCr journals**

A basic structural check has been run on your CIF. These basic checks will be run on all CIFs submitted for publication in IUCr journals (*Acta Crystallographica*, *Journal of Applied Crystallography*, *Journal of Synchrotron Radiation*); however, if you intend to submit to *Acta Crystallographica Section C* or *E* or *IUCrData*, you should make sure that full publication checks are run on the final version of your CIF prior to submission.

### **Publication of your CIF in other journals**

Please refer to the *Notes for Authors* of the relevant journal for any special instructions relating to CIF submission.

---

**PLATON version of 07/08/2019; check.def file version of 30/07/2019**

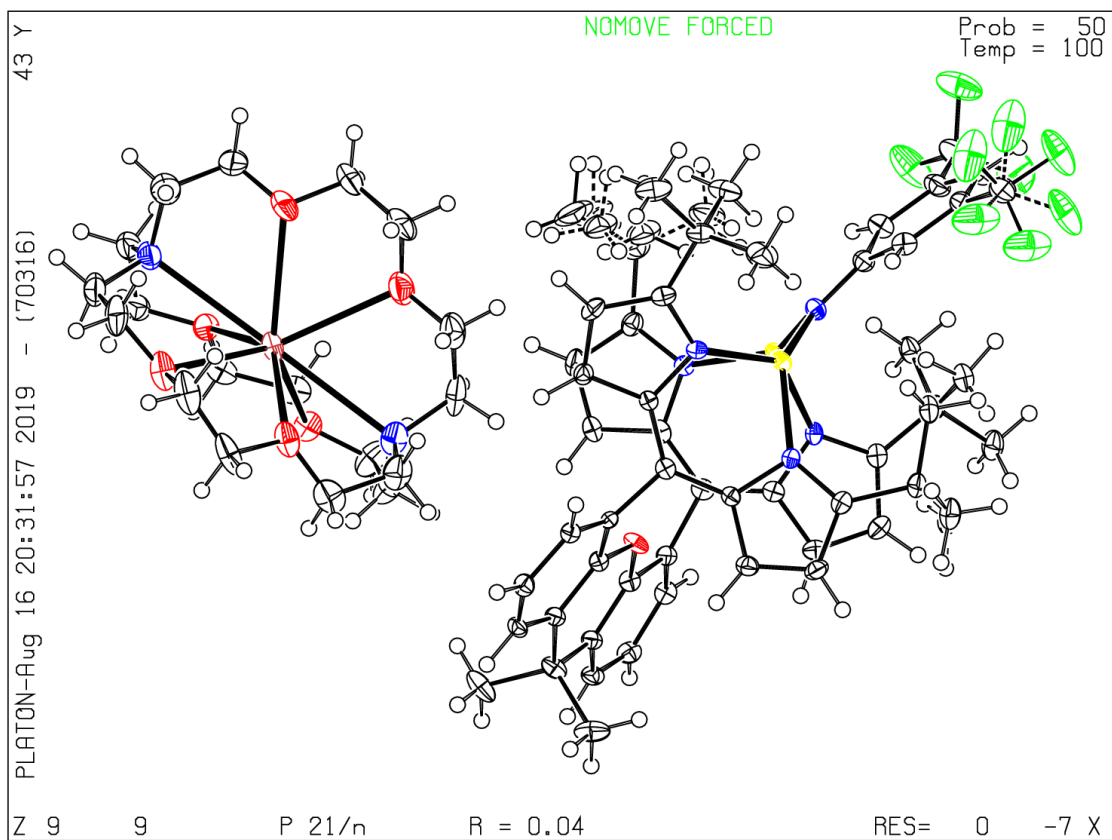

# checkCIF/PLATON report

Structure factors have been supplied for datablock(s) 10

THIS REPORT IS FOR GUIDANCE ONLY. IF USED AS PART OF A REVIEW PROCEDURE FOR PUBLICATION, IT SHOULD NOT REPLACE THE EXPERTISE OF AN EXPERIENCED CRYSTALLOGRAPHIC REFEREE.

No syntax errors found. [CIF dictionary](#) [Interpreting this report](#)

## Datablock: 10

---

Bond precision: C-C = 0.0077 A                      Wavelength=0.71073

Cell:                      a=36.448(4)              b=11.0154(11)              c=13.4471(12)  
                            alpha=90              beta=105.928(3)              gamma=90

Temperature:              100 K

|                        | Calculated                       | Reported                |
|------------------------|----------------------------------|-------------------------|
| Volume                 | 5191.6(9)                        | 5191.6(9)               |
| Space group            | C 2/c                            | C 2/c                   |
| Hall group             | -C 2yc                           | -C 2yc                  |
| Moiety formula         | 2(C25 H28 Cl2 Cu N3), C2<br>H3 N | ?                       |
| Sum formula            | C52 H59 Cl4 Cu2 N7               | C26 H29.50 Cl2 Cu N3.50 |
| Mr                     | 1050.96                          | 525.47                  |
| Dx, g cm <sup>-3</sup> | 1.345                            | 1.345                   |
| Z                      | 4                                | 8                       |
| Mu (mm <sup>-1</sup> ) | 1.067                            | 1.067                   |
| F000                   | 2184.0                           | 2184.0                  |
| F000'                  | 2189.40                          |                         |
| h,k,lmax               | 43,13,16                         | 43,13,16                |
| Nref                   | 4616                             | 4558                    |
| Tmin,Tmax              | 0.825,0.870                      | 0.656,0.745             |
| Tmin'                  | 0.758                            |                         |

Correction method= # Reported T Limits: Tmin=0.656 Tmax=0.745  
AbsCorr = MULTI-SCAN

Data completeness= 0.987                      Theta(max)= 25.092

R(reflections)= 0.0691( 3040)              wR2(reflections)= 0.1194( 4558)

S = 1.117                      Npar= 416

---

The following ALERTS were generated. Each ALERT has the format

**test-name\_ALERT\_alert-type\_alert-level.**

Click on the hyperlinks for more details of the test.

---

**Alert level C**

|                                   |                                                  |                             |         |              |
|-----------------------------------|--------------------------------------------------|-----------------------------|---------|--------------|
| <a href="#">PLAT213_ALERT_2_C</a> | Atom C21                                         | has ADP max/min Ratio ..... | 3.5     | prolat       |
| <a href="#">PLAT220_ALERT_2_C</a> | Non-Solvent Resd 1 C                             | Ueq(max)/Ueq(min) Range     | 3.6     | Ratio        |
| <a href="#">PLAT222_ALERT_3_C</a> | Non-Solv. Resd 1 H                               | Uiso(max)/Uiso(min) Range   | 10.0    | Ratio        |
| <a href="#">PLAT245_ALERT_2_C</a> | U(iso) H8                                        | Smaller than U(eq) C8       | by      | 0.011 Ang**2 |
| <a href="#">PLAT245_ALERT_2_C</a> | U(iso) H12A                                      | Smaller than U(eq) C12      | by      | 0.013 Ang**2 |
| <a href="#">PLAT245_ALERT_2_C</a> | U(iso) H16A                                      | Smaller than U(eq) C16      | by      | 0.019 Ang**2 |
| <a href="#">PLAT341_ALERT_3_C</a> | Low Bond Precision on C-C Bonds .....            |                             | 0.00771 | Ang.         |
| <a href="#">PLAT391_ALERT_3_C</a> | Deviating Methyl C13                             | H-C-H Bond Angle ....       | 102     | Degree       |
| <a href="#">PLAT906_ALERT_3_C</a> | Large K Value in the Analysis of Variance .....  |                             | 7.917   | Check        |
| <a href="#">PLAT906_ALERT_3_C</a> | Large K Value in the Analysis of Variance .....  |                             | 2.678   | Check        |
| <a href="#">PLAT911_ALERT_3_C</a> | Missing FCF Refl Between Thmin & STh/L=          | 0.597                       | 56      | Report       |
| <a href="#">PLAT978_ALERT_2_C</a> | Number C-C Bonds with Positive Residual Density. |                             | 0       | Info         |

---

**Alert level G**

|                                   |                                                  |                |       |             |
|-----------------------------------|--------------------------------------------------|----------------|-------|-------------|
| <a href="#">PLAT003_ALERT_2_G</a> | Number of Uiso or Uij Restrained non-H Atoms ... |                | 3     | Report      |
| <a href="#">PLAT045_ALERT_1_G</a> | Calculated and Reported Z Differ by a Factor ... |                | 0.50  | Check       |
| <a href="#">PLAT083_ALERT_2_G</a> | SHELXL Second Parameter in WGHT Unusually Large  |                | 19.51 | Why ?       |
| <a href="#">PLAT128_ALERT_4_G</a> | Alternate Setting for Input Space Group C2/c     |                | I2/a  | Note        |
| <a href="#">PLAT164_ALERT_4_G</a> | Nr. of Refined C-H H-Atoms in Heavy-Atom Struct. |                | 27    | Note        |
| <a href="#">PLAT187_ALERT_4_G</a> | The CIF-Embedded .res File Contains RIGU Records |                | 1     | Report      |
| <a href="#">PLAT300_ALERT_4_G</a> | Atom Site Occupancy of N1S                       | Constrained at | 0.5   | Check       |
| <a href="#">PLAT300_ALERT_4_G</a> | Atom Site Occupancy of C1S                       | Constrained at | 0.5   | Check       |
| <a href="#">PLAT300_ALERT_4_G</a> | Atom Site Occupancy of C2S                       | Constrained at | 0.5   | Check       |
| <a href="#">PLAT300_ALERT_4_G</a> | Atom Site Occupancy of H2SA                      | Constrained at | 0.5   | Check       |
| <a href="#">PLAT300_ALERT_4_G</a> | Atom Site Occupancy of H2SB                      | Constrained at | 0.5   | Check       |
| <a href="#">PLAT300_ALERT_4_G</a> | Atom Site Occupancy of H2SC                      | Constrained at | 0.5   | Check       |
| <a href="#">PLAT302_ALERT_4_G</a> | Anion/Solvent/Minor-Residue Disorder (Resd 2 )   |                | 100%  | Note        |
| <a href="#">PLAT720_ALERT_4_G</a> | Number of Unusual/Non-Standard Labels .....      |                | 3     | Note        |
| <a href="#">PLAT789_ALERT_4_G</a> | Atoms with Negative _atom_site_disorder_group #  |                | 6     | Check       |
| <a href="#">PLAT794_ALERT_5_G</a> | Tentative Bond Valency for Cu1 (I)               |                | 0.98  | Info        |
| <a href="#">PLAT860_ALERT_3_G</a> | Number of Least-Squares Restraints .....         |                | 9     | Note        |
| <a href="#">PLAT883_ALERT_1_G</a> | No Info/Value for _atom_sites_solution_primary . |                |       | Please Do ! |
| <a href="#">PLAT909_ALERT_3_G</a> | Percentage of I>2sig(I) Data at Theta(Max) Still |                | 41%   | Note        |
| <a href="#">PLAT910_ALERT_3_G</a> | Missing # of FCF Reflection(s) Below Theta(Min). |                | 3     | Note        |

---

0 **ALERT level A** = Most likely a serious problem - resolve or explain  
0 **ALERT level B** = A potentially serious problem, consider carefully  
12 **ALERT level C** = Check. Ensure it is not caused by an omission or oversight  
20 **ALERT level G** = General information/check it is not something unexpected

2 ALERT type 1 CIF construction/syntax error, inconsistent or missing data  
8 ALERT type 2 Indicator that the structure model may be wrong or deficient  
9 ALERT type 3 Indicator that the structure quality may be low  
12 ALERT type 4 Improvement, methodology, query or suggestion  
1 ALERT type 5 Informative message, check

---

It is advisable to attempt to resolve as many as possible of the alerts in all categories. Often the minor alerts point to easily fixed oversights, errors and omissions in your CIF or refinement strategy, so attention to these fine details can be worthwhile. In order to resolve some of the more serious problems it may be necessary to carry out additional measurements or structure refinements. However, the purpose of your study may justify the reported deviations and the more serious of these should normally be commented upon in the discussion or experimental section of a paper or in the "special\_details" fields of the CIF. checkCIF was carefully designed to identify outliers and unusual parameters, but every test has its limitations and alerts that are not important in a particular case may appear. Conversely, the absence of alerts does not guarantee there are no aspects of the results needing attention. It is up to the individual to critically assess their own results and, if necessary, seek expert advice.

### **Publication of your CIF in IUCr journals**

A basic structural check has been run on your CIF. These basic checks will be run on all CIFs submitted for publication in IUCr journals (*Acta Crystallographica*, *Journal of Applied Crystallography*, *Journal of Synchrotron Radiation*); however, if you intend to submit to *Acta Crystallographica Section C* or *E* or *IUCrData*, you should make sure that full publication checks are run on the final version of your CIF prior to submission.

### **Publication of your CIF in other journals**

Please refer to the *Notes for Authors* of the relevant journal for any special instructions relating to CIF submission.

---

**PLATON version of 07/08/2019; check.def file version of 30/07/2019**

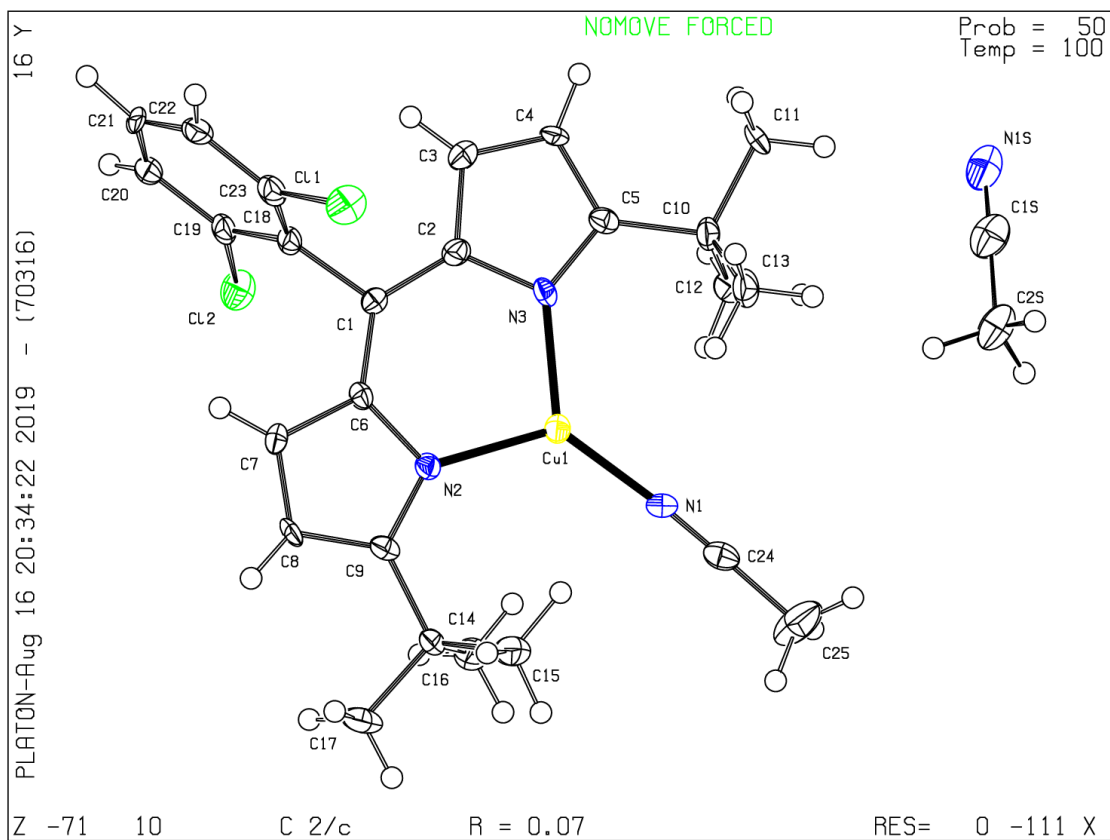

# checkCIF/PLATON report

Structure factors have been supplied for datablock(s) 11

THIS REPORT IS FOR GUIDANCE ONLY. IF USED AS PART OF A REVIEW PROCEDURE FOR PUBLICATION, IT SHOULD NOT REPLACE THE EXPERTISE OF AN EXPERIENCED CRYSTALLOGRAPHIC REFEREE.

No syntax errors found.

[CIF dictionary](#)

[Interpreting this report](#)

## Datablock: 11

---

Bond precision: C-C = 0.0063 A

Wavelength=0.71073

Cell: a=13.1817(13) b=10.7516(19) c=19.191(3)  
alpha=90 beta=95.400(8) gamma=90  
Temperature: 100 K

|                        | Calculated                   | Reported          |
|------------------------|------------------------------|-------------------|
| Volume                 | 2707.8(7)                    | 2707.7(7)         |
| Space group            | P 21/n                       | P 21/n            |
| Hall group             | -P 2yn                       | -P 2yn            |
| Moiety formula         | C46 H50 Cl6 Cu2 N4, 2(C6 H6) | ?                 |
| Sum formula            | C58 H62 Cl6 Cu2 N4           | C29 H31 Cl3 Cu N2 |
| Mr                     | 1154.92                      | 577.45            |
| Dx, g cm <sup>-3</sup> | 1.416                        | 1.417             |
| Z                      | 2                            | 4                 |
| Mu (mm <sup>-1</sup> ) | 1.124                        | 1.124             |
| F000                   | 1196.0                       | 1196.0            |
| F000'                  | 1199.32                      |                   |
| h,k,lmax               | 15,12,22                     | 15,12,22          |
| Nref                   | 4809                         | 4789              |
| Tmin,Tmax              | 0.874,0.914                  | 0.670,0.745       |
| Tmin'                  | 0.874                        |                   |

Correction method= # Reported T Limits: Tmin=0.670 Tmax=0.745

AbsCorr = MULTI-SCAN

Data completeness= 0.996

Theta(max)= 25.070

R(reflections)= 0.0528( 3687)

wR2(reflections)= 0.1310( 4789)

S = 1.034

Npar= 322

---



The following ALERTS were generated. Each ALERT has the format

**test-name\_ALERT\_alert-type\_alert-level.**

Click on the hyperlinks for more details of the test.

---

**Alert level C**

|                                   |                                                 |              |
|-----------------------------------|-------------------------------------------------|--------------|
| <a href="#">PLAT341_ALERT_3_C</a> | Low Bond Precision on C-C Bonds .....           | 0.00631 Ang. |
| <a href="#">PLAT906_ALERT_3_C</a> | Large K Value in the Analysis of Variance ..... | 2.948 Check  |
| <a href="#">PLAT911_ALERT_3_C</a> | Missing FCF Refl Between Thmin & STh/L= 0.596   | 16 Report    |

---

**Alert level G**

|                                   |                                                  |             |
|-----------------------------------|--------------------------------------------------|-------------|
| <a href="#">PLAT045_ALERT_1_G</a> | Calculated and Reported Z Differ by a Factor ... | 0.50 Check  |
| <a href="#">PLAT083_ALERT_2_G</a> | SHELXL Second Parameter in WGHT Unusually Large  | 10.02 Why ? |
| <a href="#">PLAT232_ALERT_2_G</a> | Hirshfeld Test Diff (M-X) Cu1 --Cl1 .            | 15.3 s.u.   |
| <a href="#">PLAT883_ALERT_1_G</a> | No Info/Value for _atom_sites_solution_primary . | Please Do ! |
| <a href="#">PLAT909_ALERT_3_G</a> | Percentage of I>2sig(I) Data at Theta(Max) Still | 52% Note    |
| <a href="#">PLAT910_ALERT_3_G</a> | Missing # of FCF Reflection(s) Below Theta(Min). | 4 Note      |
| <a href="#">PLAT933_ALERT_2_G</a> | Number of OMIT Records in Embedded .res File ... | 1 Note      |
| <a href="#">PLAT978_ALERT_2_G</a> | Number C-C Bonds with Positive Residual Density. | 5 Info      |

- 
- 0 **ALERT level A** = Most likely a serious problem - resolve or explain  
0 **ALERT level B** = A potentially serious problem, consider carefully  
3 **ALERT level C** = Check. Ensure it is not caused by an omission or oversight  
8 **ALERT level G** = General information/check it is not something unexpected

- 2 ALERT type 1 CIF construction/syntax error, inconsistent or missing data  
4 ALERT type 2 Indicator that the structure model may be wrong or deficient  
5 ALERT type 3 Indicator that the structure quality may be low  
0 ALERT type 4 Improvement, methodology, query or suggestion  
0 ALERT type 5 Informative message, check
-

It is advisable to attempt to resolve as many as possible of the alerts in all categories. Often the minor alerts point to easily fixed oversights, errors and omissions in your CIF or refinement strategy, so attention to these fine details can be worthwhile. In order to resolve some of the more serious problems it may be necessary to carry out additional measurements or structure refinements. However, the purpose of your study may justify the reported deviations and the more serious of these should normally be commented upon in the discussion or experimental section of a paper or in the "special\_details" fields of the CIF. checkCIF was carefully designed to identify outliers and unusual parameters, but every test has its limitations and alerts that are not important in a particular case may appear. Conversely, the absence of alerts does not guarantee there are no aspects of the results needing attention. It is up to the individual to critically assess their own results and, if necessary, seek expert advice.

### **Publication of your CIF in IUCr journals**

A basic structural check has been run on your CIF. These basic checks will be run on all CIFs submitted for publication in IUCr journals (*Acta Crystallographica*, *Journal of Applied Crystallography*, *Journal of Synchrotron Radiation*); however, if you intend to submit to *Acta Crystallographica Section C* or *E* or *IUCrData*, you should make sure that full publication checks are run on the final version of your CIF prior to submission.

### **Publication of your CIF in other journals**

Please refer to the *Notes for Authors* of the relevant journal for any special instructions relating to CIF submission.

---

**PLATON version of 07/08/2019; check.def file version of 30/07/2019**

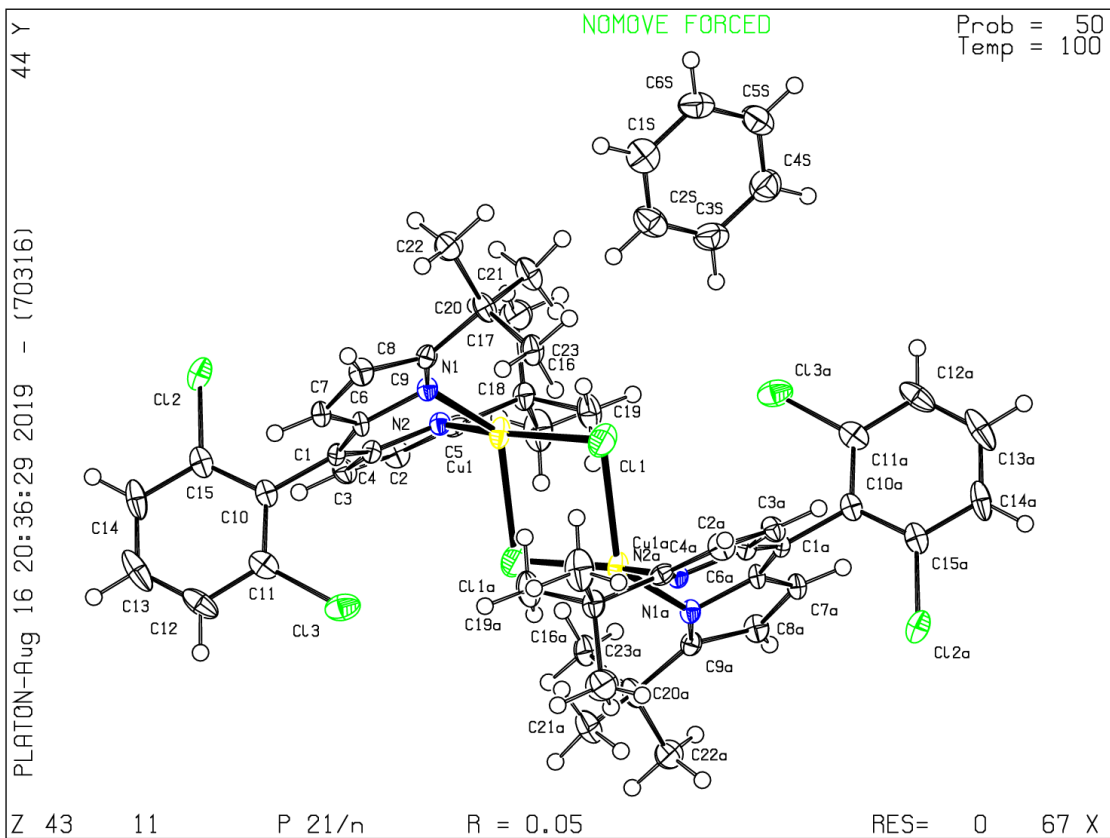

## checkCIF/PLATON report

Structure factors have been supplied for datablock(s) 12

THIS REPORT IS FOR GUIDANCE ONLY. IF USED AS PART OF A REVIEW PROCEDURE FOR PUBLICATION, IT SHOULD NOT REPLACE THE EXPERTISE OF AN EXPERIENCED CRYSTALLOGRAPHIC REFEREE.

No syntax errors found. [CIF dictionary](#) [Interpreting this report](#)

### Datablock: 12

---

Bond precision: C-C = 0.0055 A Wavelength=0.71073  
Cell: a=11.0169(6) b=15.6053(7) c=21.4320(11)  
alpha=80.283(4) beta=89.945(4) gamma=74.102(4)  
Temperature: 100 K

|                | Calculated                      | Reported             |
|----------------|---------------------------------|----------------------|
| Volume         | 3488.9(3)                       | 3488.9(3)            |
| Space group    | P -1                            | P -1                 |
| Hall group     | -P 1                            | -P 1                 |
| Moiety formula | C75 H82 Cu2 N4 O P2, C4 H8<br>O | ?                    |
| Sum formula    | C79 H90 Cu2 N4 O2 P2            | C79 H90 Cu2 N4 O2 P2 |
| Mr             | 1316.60                         | 1316.56              |
| Dx, g cm-3     | 1.253                           | 1.253                |
| Z              | 2                               | 2                    |
| Mu (mm-1)      | 0.704                           | 0.704                |
| F000           | 1392.0                          | 1392.0               |
| F000'          | 1394.07                         |                      |
| h,k,lmax       | 13,18,25                        | 13,18,25             |
| Nref           | 12341                           | 12313                |
| Tmin,Tmax      | 0.906,0.939                     | 0.701,0.746          |
| Tmin'          | 0.906                           |                      |

Correction method= # Reported T Limits: Tmin=0.701 Tmax=0.746  
AbsCorr = MULTI-SCAN

Data completeness= 0.998 Theta(max)= 25.026

R(reflections)= 0.0554( 7542) wR2(reflections)= 0.1085( 12313)

S = 1.007 Npar= 868

---

The following ALERTS were generated. Each ALERT has the format

**test-name\_ALERT\_alert-type\_alert-level.**

Click on the hyperlinks for more details of the test.

---

**Alert level C**

|                                   |                                                  |       |        |
|-----------------------------------|--------------------------------------------------|-------|--------|
| <a href="#">PLAT220_ALERT_2_C</a> | Non-Solvent Resd 1 C Ueq(max)/Ueq(min) Range     | 3.2   | Ratio  |
| <a href="#">PLAT906_ALERT_3_C</a> | Large K Value in the Analysis of Variance .....  | 3.545 | Check  |
| <a href="#">PLAT910_ALERT_3_C</a> | Missing # of FCF Reflection(s) Below Theta(Min). | 6     | Note   |
| <a href="#">PLAT911_ALERT_3_C</a> | Missing FCF Refl Between Thmin & STh/L= 0.595    | 22    | Report |

---

**Alert level G**

|                                   |                                                  |       |             |
|-----------------------------------|--------------------------------------------------|-------|-------------|
| <a href="#">PLAT002_ALERT_2_G</a> | Number of Distance or Angle Restraints on AtSite | 10    | Note        |
| <a href="#">PLAT003_ALERT_2_G</a> | Number of Uiso or Uij Restrained non-H Atoms ... | 10    | Report      |
| <a href="#">PLAT154_ALERT_1_G</a> | The s.u.'s on the Cell Angles are Equal ..(Note) | 0.004 | Degree      |
| <a href="#">PLAT175_ALERT_4_G</a> | The CIF-Embedded .res File Contains SAME Records | 1     | Report      |
| <a href="#">PLAT178_ALERT_4_G</a> | The CIF-Embedded .res File Contains SIMU Records | 1     | Report      |
| <a href="#">PLAT187_ALERT_4_G</a> | The CIF-Embedded .res File Contains RIGU Records | 2     | Report      |
| <a href="#">PLAT302_ALERT_4_G</a> | Anion/Solvent/Minor-Residue Disorder (Resd 2 )   | 100%  | Note        |
| <a href="#">PLAT302_ALERT_4_G</a> | Anion/Solvent/Minor-Residue Disorder (Resd 3 )   | 100%  | Note        |
| <a href="#">PLAT304_ALERT_4_G</a> | Non-Integer Number of Atoms in ..... Resd 2      | 9.41  | Check       |
| <a href="#">PLAT304_ALERT_4_G</a> | Non-Integer Number of Atoms in ..... Resd 3      | 3.59  | Check       |
| <a href="#">PLAT398_ALERT_2_G</a> | Deviating C-O-C Angle From 120 for O1S           | 108.7 | Degree      |
| <a href="#">PLAT398_ALERT_2_G</a> | Deviating C-O-C Angle From 120 for O1T           | 108.0 | Degree      |
| <a href="#">PLAT411_ALERT_2_G</a> | Short Inter H...H Contact H40 ..H2TB .           | 2.10  | Ang.        |
|                                   | 1-x,1-y,2-z =                                    | 2_667 | Check       |
| <a href="#">PLAT411_ALERT_2_G</a> | Short Inter H...H Contact H41 ..H2TB .           | 1.81  | Ang.        |
|                                   | 1-x,1-y,2-z =                                    | 2_667 | Check       |
| <a href="#">PLAT413_ALERT_2_G</a> | Short Inter XH3 .. XHn H38A ..H2TA .             | 2.05  | Ang.        |
|                                   | -1+x,y,z =                                       | 1_455 | Check       |
| <a href="#">PLAT413_ALERT_2_G</a> | Short Inter XH3 .. XHn H67A ..H3TA .             | 1.89  | Ang.        |
|                                   | 2-x,1-y,2-z =                                    | 2_767 | Check       |
| <a href="#">PLAT720_ALERT_4_G</a> | Number of Unusual/Non-Standard Labels .....      | 16    | Note        |
| <a href="#">PLAT794_ALERT_5_G</a> | Tentative Bond Valency for Cu1 (I) .             | 0.93  | Info        |
| <a href="#">PLAT794_ALERT_5_G</a> | Tentative Bond Valency for Cu2 (I) .             | 0.92  | Info        |
| <a href="#">PLAT860_ALERT_3_G</a> | Number of Least-Squares Restraints .....         | 190   | Note        |
| <a href="#">PLAT883_ALERT_1_G</a> | No Info/Value for _atom_sites_solution_primary . |       | Please Do ! |
| <a href="#">PLAT909_ALERT_3_G</a> | Percentage of I>2sig(I) Data at Theta(Max) Still | 31%   | Note        |
| <a href="#">PLAT933_ALERT_2_G</a> | Number of OMIT Records in Embedded .res File ... | 7     | Note        |
| <a href="#">PLAT978_ALERT_2_G</a> | Number C-C Bonds with Positive Residual Density. | 3     | Info        |

---

0 **ALERT level A** = Most likely a serious problem - resolve or explain  
0 **ALERT level B** = A potentially serious problem, consider carefully  
4 **ALERT level C** = Check. Ensure it is not caused by an omission or oversight  
24 **ALERT level G** = General information/check it is not something unexpected

2 ALERT type 1 CIF construction/syntax error, inconsistent or missing data  
11 ALERT type 2 Indicator that the structure model may be wrong or deficient  
5 ALERT type 3 Indicator that the structure quality may be low  
8 ALERT type 4 Improvement, methodology, query or suggestion  
2 ALERT type 5 Informative message, check

---

It is advisable to attempt to resolve as many as possible of the alerts in all categories. Often the minor alerts point to easily fixed oversights, errors and omissions in your CIF or refinement strategy, so attention to these fine details can be worthwhile. In order to resolve some of the more serious problems it may be necessary to carry out additional measurements or structure refinements. However, the purpose of your study may justify the reported deviations and the more serious of these should normally be commented upon in the discussion or experimental section of a paper or in the "special\_details" fields of the CIF. checkCIF was carefully designed to identify outliers and unusual parameters, but every test has its limitations and alerts that are not important in a particular case may appear. Conversely, the absence of alerts does not guarantee there are no aspects of the results needing attention. It is up to the individual to critically assess their own results and, if necessary, seek expert advice.

### **Publication of your CIF in IUCr journals**

A basic structural check has been run on your CIF. These basic checks will be run on all CIFs submitted for publication in IUCr journals (*Acta Crystallographica*, *Journal of Applied Crystallography*, *Journal of Synchrotron Radiation*); however, if you intend to submit to *Acta Crystallographica Section C* or *E* or *IUCrData*, you should make sure that full publication checks are run on the final version of your CIF prior to submission.

### **Publication of your CIF in other journals**

Please refer to the *Notes for Authors* of the relevant journal for any special instructions relating to CIF submission.

---

**PLATON version of 07/08/2019; check.def file version of 30/07/2019**

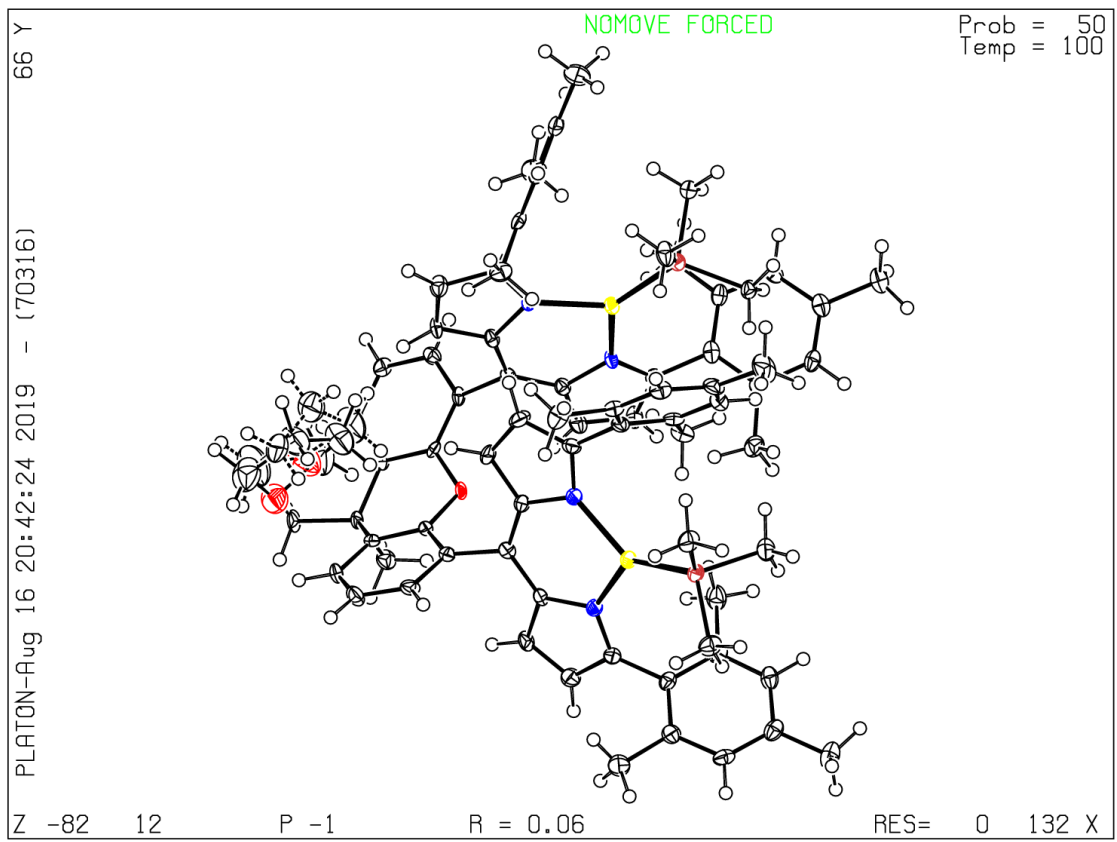

## checkCIF/PLATON report

Structure factors have been supplied for datablock(s) 13

THIS REPORT IS FOR GUIDANCE ONLY. IF USED AS PART OF A REVIEW PROCEDURE FOR PUBLICATION, IT SHOULD NOT REPLACE THE EXPERTISE OF AN EXPERIENCED CRYSTALLOGRAPHIC REFEREE.

No syntax errors found. [CIF dictionary](#) [Interpreting this report](#)

### Datablock: 13

---

|                        |                                                |                           |             |
|------------------------|------------------------------------------------|---------------------------|-------------|
| Bond precision:        | C-C = 0.0085 A                                 | Wavelength=0.71073        |             |
| Cell:                  | a=57.196(11)                                   | b=25.306(4)               | c=26.078(3) |
|                        | alpha=90                                       | beta=117.092(7)           | gamma=90    |
| Temperature:           | 100 K                                          |                           |             |
|                        | Calculated                                     | Reported                  |             |
| Volume                 | 33604(9)                                       | 33604(10)                 |             |
| Space group            | C 2/c                                          | C 2/c                     |             |
| Hall group             | -C 2yc                                         | -C 2yc                    |             |
| Moiety formula         | 8(C85 H86 Cu2 N4 O P2),<br>11(C7 H8), 3(C6 H6) | ?                         |             |
| Sum formula            | C775 H794 Cu16 N32 O8 P16                      | C96.88 H99.25 Cu2 N4 O P2 |             |
| Mr                     | 12196.78                                       | 1524.57                   |             |
| Dx, g cm <sup>-3</sup> | 1.205                                          | 1.205                     |             |
| Z                      | 2                                              | 16                        |             |
| Mu (mm <sup>-1</sup> ) | 0.594                                          | 0.594                     |             |
| F000                   | 12872.0                                        | 12872.0                   |             |
| F000'                  | 12889.13                                       |                           |             |
| h,k,lmax               | 68,30,31                                       | 68,30,31                  |             |
| Nref                   | 30364                                          | 30048                     |             |
| Tmin,Tmax              | 0.830,0.922                                    | 0.672,0.745               |             |
| Tmin'                  | 0.798                                          |                           |             |

Correction method= # Reported T Limits: Tmin=0.672 Tmax=0.745  
AbsCorr = MULTI-SCAN

Data completeness= 0.990                      Theta(max)= 25.225

R(reflections)= 0.0744( 19269)              wR2(reflections)= 0.1931( 30048)

S = 1.052                                      Npar= 1990

---



The following ALERTS were generated. Each ALERT has the format

**test-name\_ALERT\_alert-type\_alert-level.**

Click on the hyperlinks for more details of the test.

---

**Alert level B**

[PLAT910\\_ALERT\\_3\\_B](#) Missing # of FCF Reflection(s) Below Theta(Min).

22 Note

**Author Response: Several reflects are co-incident with the diffractometer beamstop an**

---

**Alert level C**

[RINTA01\\_ALERT\\_3\\_C](#) The value of Rint is greater than 0.12

Rint given 0.127

|                                   |                                                  |         |        |
|-----------------------------------|--------------------------------------------------|---------|--------|
| <a href="#">PLAT020_ALERT_3_C</a> | The Value of Rint is Greater Than 0.12 .....     | 0.127   | Report |
| <a href="#">PLAT094_ALERT_2_C</a> | Ratio of Maximum / Minimum Residual Density .... | 2.25    | Report |
| <a href="#">PLAT220_ALERT_2_C</a> | Non-Solvent Resd 1 C Ueq(max)/Ueq(min) Range     | 4.2     | Ratio  |
| <a href="#">PLAT220_ALERT_2_C</a> | Non-Solvent Resd 2 C Ueq(max)/Ueq(min) Range     | 3.6     | Ratio  |
| <a href="#">PLAT222_ALERT_3_C</a> | Non-Solv. Resd 1 H Uiso(max)/Uiso(min) Range     | 4.1     | Ratio  |
| <a href="#">PLAT241_ALERT_2_C</a> | High 'MainMol' Ueq as Compared to Neighbors of   | C72A    | Check  |
| <a href="#">PLAT242_ALERT_2_C</a> | Low 'MainMol' Ueq as Compared to Neighbors of    | C6A     | Check  |
| <a href="#">PLAT242_ALERT_2_C</a> | Low 'MainMol' Ueq as Compared to Neighbors of    | C68A    | Check  |
| <a href="#">PLAT242_ALERT_2_C</a> | Low 'MainMol' Ueq as Compared to Neighbors of    | C80B    | Check  |
| <a href="#">PLAT242_ALERT_2_C</a> | Low 'MainMol' Ueq as Compared to Neighbors of    | C83B    | Check  |
| <a href="#">PLAT250_ALERT_2_C</a> | Large U3/U1 Ratio for Average U(i,j) Tensor .... | 2.3     | Note   |
| <a href="#">PLAT250_ALERT_2_C</a> | Large U3/U1 Ratio for Average U(i,j) Tensor .... | 2.3     | Note   |
| <a href="#">PLAT260_ALERT_2_C</a> | Large Average Ueq of Residue Including C11S      | 0.133   | Check  |
| <a href="#">PLAT260_ALERT_2_C</a> | Large Average Ueq of Residue Including C21S      | 0.131   | Check  |
| <a href="#">PLAT260_ALERT_2_C</a> | Large Average Ueq of Residue Including C31S      | 0.108   | Check  |
| <a href="#">PLAT260_ALERT_2_C</a> | Large Average Ueq of Residue Including C21T      | 0.131   | Check  |
| <a href="#">PLAT260_ALERT_2_C</a> | Large Average Ueq of Residue Including C31T      | 0.108   | Check  |
| <a href="#">PLAT260_ALERT_2_C</a> | Large Average Ueq of Residue Including C1S       | 0.102   | Check  |
| <a href="#">PLAT260_ALERT_2_C</a> | Large Average Ueq of Residue Including C1T       | 0.102   | Check  |
| <a href="#">PLAT331_ALERT_2_C</a> | Small Aver Phenyl C-C Dist C68A -C73A .          | 1.37    | Ang.   |
| <a href="#">PLAT331_ALERT_2_C</a> | Small Aver Phenyl C-C Dist C80B -C85B .          | 1.37    | Ang.   |
| <a href="#">PLAT341_ALERT_3_C</a> | Low Bond Precision on C-C Bonds .....            | 0.00847 | Ang.   |
| <a href="#">PLAT601_ALERT_2_C</a> | Structure Contains Solvent Accessible VOIDS of . | 94      | Ang**3 |
| <a href="#">PLAT721_ALERT_1_C</a> | Bond Calc 1.41(7), Rep 1.39000 Dev...            | 0.02    | Ang.   |
|                                   | C21T -C22T 1.555 1.555 .....                     | # 503   | Check  |
| <a href="#">PLAT906_ALERT_3_C</a> | Large K Value in the Analysis of Variance .....  | 5.704   | Check  |
| <a href="#">PLAT911_ALERT_3_C</a> | Missing FCF Refl Between Thmin & STh/L= 0.600    | 295     | Report |
| <a href="#">PLAT918_ALERT_3_C</a> | Reflection(s) with I(obs) much Smaller I(calc) . | 1       | Check  |

---

**Alert level G**

[CELLZ01\\_ALERT\\_1\\_G](#) Difference between formula and atom\_site contents detected.

[CELLZ01\\_ALERT\\_1\\_G](#) ALERT: check formula stoichiometry or atom site occupancies.

From the CIF: \_cell\_formula\_units\_Z 16

From the CIF: \_chemical\_formula\_sum C96.88 H99.25 Cu2 N4 O P2

TEST: Compare cell contents of formula and atom\_site data

| atom | Z*formula | cif sites | diff |
|------|-----------|-----------|------|
| C    | 1550.08   | 1550.00   | 0.08 |
| H    | 1588.00   | 1588.00   | 0.00 |
| Cu   | 32.00     | 32.00     | 0.00 |
| N    | 64.00     | 64.00     | 0.00 |
| O    | 16.00     | 16.00     | 0.00 |
| P    | 32.00     | 32.00     | 0.00 |

[PLAT002\\_ALERT\\_2\\_G](#) Number of Distance or Angle Restraints on AtSite

39 Note

|                   |                                                  |        |             |
|-------------------|--------------------------------------------------|--------|-------------|
| PLAT003 ALERT 2 G | Number of Uiso or Uij Restrained non-H Atoms ... | 27     | Report      |
| PLAT045 ALERT 1 G | Calculated and Reported Z Differ by a Factor ... | 0.13   | Check       |
| PLAT083 ALERT 2 G | SHELXL Second Parameter in WGHT Unusually Large  | 266.90 | Why ?       |
| PLAT128 ALERT 4 G | Alternate Setting for Input Space Group C2/c     | I2/a   | Note        |
| PLAT171 ALERT 4 G | The CIF-Embedded .res File Contains EADP Records | 38     | Report      |
| PLAT176 ALERT 4 G | The CIF-Embedded .res File Contains SADI Records | 7      | Report      |
| PLAT178 ALERT 4 G | The CIF-Embedded .res File Contains SIMU Records | 1      | Report      |
| PLAT187 ALERT 4 G | The CIF-Embedded .res File Contains RIGU Records | 4      | Report      |
| PLAT300 ALERT 4 G | Atom Site Occupancy of C11S Constrained at       | 0.75   | Check       |
| PLAT300 ALERT 4 G | Atom Site Occupancy of C12S Constrained at       | 0.75   | Check       |
| PLAT300 ALERT 4 G | Atom Site Occupancy of C13S Constrained at       | 0.75   | Check       |
| PLAT300 ALERT 4 G | Atom Site Occupancy of C14S Constrained at       | 0.75   | Check       |
| PLAT300 ALERT 4 G | Atom Site Occupancy of C15S Constrained at       | 0.75   | Check       |
| PLAT300 ALERT 4 G | Atom Site Occupancy of C16S Constrained at       | 0.75   | Check       |
| PLAT300 ALERT 4 G | Atom Site Occupancy of C17S Constrained at       | 0.75   | Check       |
| PLAT300 ALERT 4 G | Atom Site Occupancy of H11S Constrained at       | 0.75   | Check       |
| PLAT300 ALERT 4 G | Atom Site Occupancy of H12S Constrained at       | 0.75   | Check       |
| PLAT300 ALERT 4 G | Atom Site Occupancy of H13S Constrained at       | 0.75   | Check       |
| PLAT300 ALERT 4 G | Atom Site Occupancy of H14S Constrained at       | 0.75   | Check       |
| PLAT300 ALERT 4 G | Atom Site Occupancy of H15S Constrained at       | 0.75   | Check       |
| PLAT300 ALERT 4 G | Atom Site Occupancy of H17M Constrained at       | 0.75   | Check       |
| PLAT300 ALERT 4 G | Atom Site Occupancy of H17N Constrained at       | 0.75   | Check       |
| PLAT300 ALERT 4 G | Atom Site Occupancy of H17O Constrained at       | 0.75   | Check       |
| PLAT301 ALERT 3 G | Main Residue Disorder .....(Resd 1 )             | 13%    | Note        |
| PLAT301 ALERT 3 G | Main Residue Disorder .....(Resd 2 )             | 6%     | Note        |
| PLAT302 ALERT 4 G | Anion/Solvent/Minor-Residue Disorder (Resd 3 )   | 100%   | Note        |
| PLAT302 ALERT 4 G | Anion/Solvent/Minor-Residue Disorder (Resd 4 )   | 100%   | Note        |
| PLAT302 ALERT 4 G | Anion/Solvent/Minor-Residue Disorder (Resd 5 )   | 100%   | Note        |
| PLAT302 ALERT 4 G | Anion/Solvent/Minor-Residue Disorder (Resd 6 )   | 100%   | Note        |
| PLAT302 ALERT 4 G | Anion/Solvent/Minor-Residue Disorder (Resd 7 )   | 100%   | Note        |
| PLAT302 ALERT 4 G | Anion/Solvent/Minor-Residue Disorder (Resd 8 )   | 100%   | Note        |
| PLAT302 ALERT 4 G | Anion/Solvent/Minor-Residue Disorder (Resd 9 )   | 100%   | Note        |
| PLAT304 ALERT 4 G | Non-Integer Number of Atoms in ..... Resd 3      | 11.25  | Check       |
| PLAT304 ALERT 4 G | Non-Integer Number of Atoms in ..... Resd 5      | 8.13   | Check       |
| PLAT304 ALERT 4 G | Non-Integer Number of Atoms in ..... Resd 7      | 6.87   | Check       |
| PLAT304 ALERT 4 G | Non-Integer Number of Atoms in ..... Resd 8      | 6.07   | Check       |
| PLAT304 ALERT 4 G | Non-Integer Number of Atoms in ..... Resd 9      | 2.93   | Check       |
| PLAT380 ALERT 4 G | Incorrectly? Oriented X(sp2)-Methyl Moiety ..... | C17S   | Check       |
| PLAT380 ALERT 4 G | Incorrectly? Oriented X(sp2)-Methyl Moiety ..... | C27S   | Check       |
| PLAT380 ALERT 4 G | Incorrectly? Oriented X(sp2)-Methyl Moiety ..... | C37S   | Check       |
| PLAT412 ALERT 2 G | Short Intra XH3 .. XHn H12A ..H17A .             | 2.09   | Ang.        |
|                   | x,y,z =                                          | 1_555  | Check       |
| PLAT412 ALERT 2 G | Short Intra XH3 .. XHn H40F ..H16K .             | 2.01   | Ang.        |
|                   | x,y,z =                                          | 1_555  | Check       |
| PLAT413 ALERT 2 G | Short Inter XH3 .. XHn H31A ..H48G .             | 2.07   | Ang.        |
|                   | x,1-y,1/2+z =                                    | 6_566  | Check       |
| PLAT413 ALERT 2 G | Short Inter XH3 .. XHn H71A ..H49I .             | 2.11   | Ang.        |
|                   | 1-x,1-y,1-z =                                    | 5_666  | Check       |
| PLAT413 ALERT 2 G | Short Inter XH3 .. XHn H39D ..H22T .             | 2.13   | Ang.        |
|                   | x,1-y,1/2+z =                                    | 6_566  | Check       |
| PLAT720 ALERT 4 G | Number of Unusual/Non-Standard Labels .....      | 27     | Note        |
| PLAT722 ALERT 1 G | Angle Calc 108.00, Rep 109.50 Dev...             | 1.50   | Degree      |
|                   | H15A -C15A -H15B 1.555 1.555 1.555 #             | 124    | Check       |
| PLAT722 ALERT 1 G | Angle Calc 111.00, Rep 109.50 Dev...             | 1.50   | Degree      |
|                   | C14A -C15A -H15C 1.555 1.555 1.555 #             | 125    | Check       |
| PLAT789 ALERT 4 G | Atoms with Negative _atom_site_disorder_group #  | 15     | Check       |
| PLAT794 ALERT 5 G | Tentative Bond Valency for Cu1A (I)              | 0.95   | Info        |
| PLAT802 ALERT 4 G | CIF Input Record(s) with more than 80 Characters | 1      | Info        |
| PLAT860 ALERT 3 G | Number of Least-Squares Restraints .....         | 276    | Note        |
| PLAT883 ALERT 1 G | No Info/Value for _atom_sites_solution_primary . |        | Please Do ! |
| PLAT909 ALERT 3 G | Percentage of I>2sig(I) Data at Theta(Max) Still | 36%    | Note        |
| PLAT913 ALERT 3 G | Missing # of Very Strong Reflections in FCF .... | 1      | Note        |

|                   |                                                  |        |
|-------------------|--------------------------------------------------|--------|
| PLAT933 ALERT 2 G | Number of OMIT Records in Embedded .res File ... | 2 Note |
| PLAT978 ALERT 2 G | Number C-C Bonds with Positive Residual Density. | 1 Info |

---

0 **ALERT level A** = Most likely a serious problem - resolve or explain  
1 **ALERT level B** = A potentially serious problem, consider carefully  
28 **ALERT level C** = Check. Ensure it is not caused by an omission or oversight  
60 **ALERT level G** = General information/check it is not something unexpected

7 ALERT type 1 CIF construction/syntax error, inconsistent or missing data  
30 ALERT type 2 Indicator that the structure model may be wrong or deficient  
13 ALERT type 3 Indicator that the structure quality may be low  
38 ALERT type 4 Improvement, methodology, query or suggestion  
1 ALERT type 5 Informative message, check

---

It is advisable to attempt to resolve as many as possible of the alerts in all categories. Often the minor alerts point to easily fixed oversights, errors and omissions in your CIF or refinement strategy, so attention to these fine details can be worthwhile. In order to resolve some of the more serious problems it may be necessary to carry out additional measurements or structure refinements. However, the purpose of your study may justify the reported deviations and the more serious of these should normally be commented upon in the discussion or experimental section of a paper or in the "special\_details" fields of the CIF. checkCIF was carefully designed to identify outliers and unusual parameters, but every test has its limitations and alerts that are not important in a particular case may appear. Conversely, the absence of alerts does not guarantee there are no aspects of the results needing attention. It is up to the individual to critically assess their own results and, if necessary, seek expert advice.

### Publication of your CIF in IUCr journals

A basic structural check has been run on your CIF. These basic checks will be run on all CIFs submitted for publication in IUCr journals (*Acta Crystallographica*, *Journal of Applied Crystallography*, *Journal of Synchrotron Radiation*); however, if you intend to submit to *Acta Crystallographica Section C* or *E* or *IUCrData*, you should make sure that full publication checks are run on the final version of your CIF prior to submission.

### Publication of your CIF in other journals

Please refer to the *Notes for Authors* of the relevant journal for any special instructions relating to CIF submission.

---

**PLATON version of 07/08/2019; check.def file version of 30/07/2019**

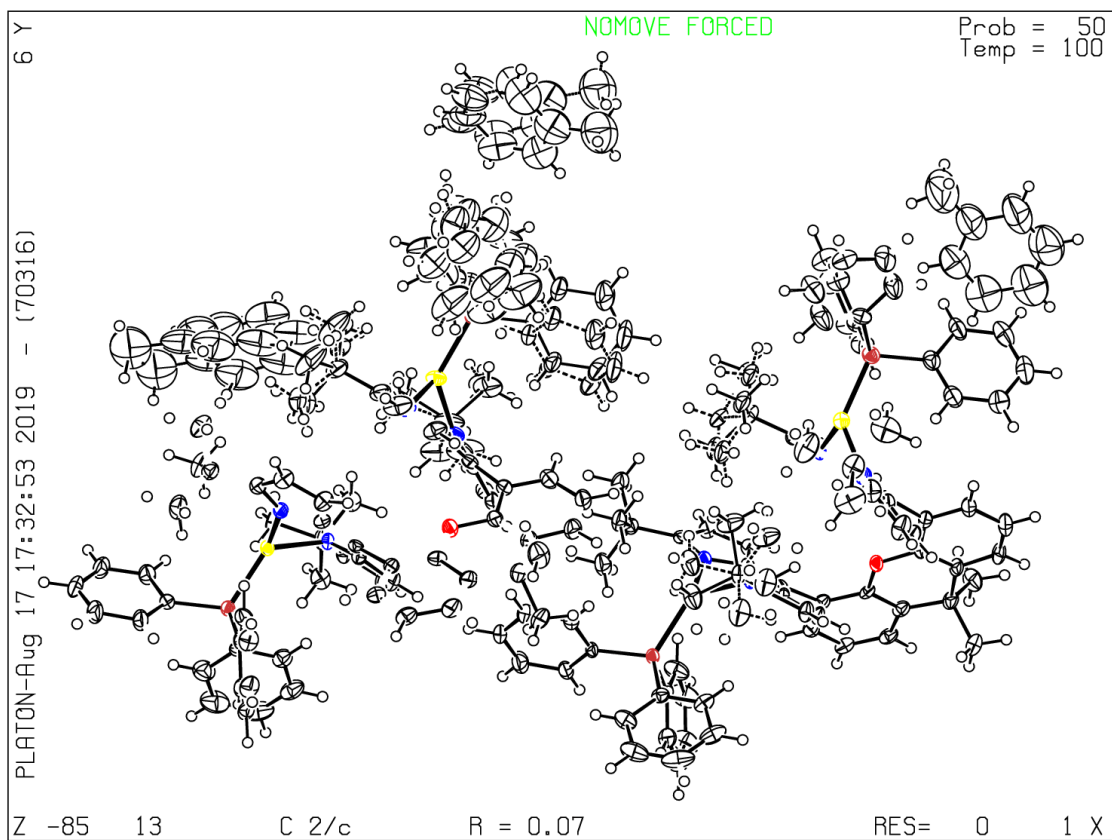



The following ALERTS were generated. Each ALERT has the format

**test-name\_ALERT\_alert-type\_alert-level.**

Click on the hyperlinks for more details of the test.

### ● Alert level C

|                                   |                                                  |         |        |
|-----------------------------------|--------------------------------------------------|---------|--------|
| <a href="#">PLAT214_ALERT_2_C</a> | Atom C1S (Anion/Solvent) ADP max/min Ratio       | 4.1     | prolat |
| <a href="#">PLAT220_ALERT_2_C</a> | Non-Solvent Resd l C Ueq(max)/Ueq(min) Range     | 3.6     | Ratio  |
| <a href="#">PLAT234_ALERT_4_C</a> | Large Hirshfeld Difference C76 --C78A            | 0.18    | Ang.   |
| <a href="#">PLAT241_ALERT_2_C</a> | High 'MainMol' Ueq as Compared to Neighbors of   | C63     | Check  |
| <a href="#">PLAT242_ALERT_2_C</a> | Low 'MainMol' Ueq as Compared to Neighbors of    | C76     | Check  |
| <a href="#">PLAT260_ALERT_2_C</a> | Large Average Ueq of Residue Including O2S       | 0.135   | Check  |
| <a href="#">PLAT341_ALERT_3_C</a> | Low Bond Precision on C-C Bonds .....            | 0.00638 | Ang.   |
| <a href="#">PLAT906_ALERT_3_C</a> | Large K Value in the Analysis of Variance .....  | 2.155   | Check  |
| <a href="#">PLAT911_ALERT_3_C</a> | Missing FCF Refl Between Thmin & STh/L= 0.600    | 179     | Report |
| <a href="#">PLAT918_ALERT_3_C</a> | Reflection(s) with I(obs) much Smaller I(calc) . | 2       | Check  |

### ● Alert level G

|                                   |                                                  |      |        |
|-----------------------------------|--------------------------------------------------|------|--------|
| <a href="#">PLAT002_ALERT_2_G</a> | Number of Distance or Angle Restraints on AtSite | 28   | Note   |
| <a href="#">PLAT003_ALERT_2_G</a> | Number of Uiso or Uij Restrained non-H Atoms ... | 27   | Report |
| <a href="#">PLAT045_ALERT_1_G</a> | Calculated and Reported Z Differ by a Factor ... | 0.50 | Check  |
| <a href="#">PLAT072_ALERT_2_G</a> | SHELXL First Parameter in WGHT Unusually Large   | 0.11 | Report |
| <a href="#">PLAT083_ALERT_2_G</a> | SHELXL Second Parameter in WGHT Unusually Large  | 5.28 | Why ?  |
| <a href="#">PLAT171_ALERT_4_G</a> | The CIF-Embedded .res File Contains EADP Records | 6    | Report |
| <a href="#">PLAT175_ALERT_4_G</a> | The CIF-Embedded .res File Contains SAME Records | 4    | Report |
| <a href="#">PLAT176_ALERT_4_G</a> | The CIF-Embedded .res File Contains SADI Records | 4    | Report |
| <a href="#">PLAT177_ALERT_4_G</a> | The CIF-Embedded .res File Contains DELU Records | 1    | Report |
| <a href="#">PLAT178_ALERT_4_G</a> | The CIF-Embedded .res File Contains SIMU Records | 2    | Report |
| <a href="#">PLAT187_ALERT_4_G</a> | The CIF-Embedded .res File Contains RIGU Records | 5    | Report |
| <a href="#">PLAT230_ALERT_2_G</a> | Hirshfeld Test Diff for C76 --C77                | 7.2  | s.u.   |
| <a href="#">PLAT232_ALERT_2_G</a> | Hirshfeld Test Diff (M-X) Cu2 --C70              | 6.5  | s.u.   |
| <a href="#">PLAT300_ALERT_4_G</a> | Atom Site Occupancy of O2S Constrained at        | 0.5  | Check  |
| <a href="#">PLAT300_ALERT_4_G</a> | Atom Site Occupancy of C5S Constrained at        | 0.5  | Check  |
| <a href="#">PLAT300_ALERT_4_G</a> | Atom Site Occupancy of C6S Constrained at        | 0.5  | Check  |
| <a href="#">PLAT300_ALERT_4_G</a> | Atom Site Occupancy of C7S Constrained at        | 0.5  | Check  |
| <a href="#">PLAT300_ALERT_4_G</a> | Atom Site Occupancy of C8S Constrained at        | 0.5  | Check  |
| <a href="#">PLAT300_ALERT_4_G</a> | Atom Site Occupancy of H5SA Constrained at       | 0.5  | Check  |
| <a href="#">PLAT300_ALERT_4_G</a> | Atom Site Occupancy of H5SB Constrained at       | 0.5  | Check  |
| <a href="#">PLAT300_ALERT_4_G</a> | Atom Site Occupancy of H5SC Constrained at       | 0.5  | Check  |
| <a href="#">PLAT300_ALERT_4_G</a> | Atom Site Occupancy of H6SA Constrained at       | 0.5  | Check  |
| <a href="#">PLAT300_ALERT_4_G</a> | Atom Site Occupancy of H6SB Constrained at       | 0.5  | Check  |
| <a href="#">PLAT300_ALERT_4_G</a> | Atom Site Occupancy of H7SA Constrained at       | 0.5  | Check  |
| <a href="#">PLAT300_ALERT_4_G</a> | Atom Site Occupancy of H7SB Constrained at       | 0.5  | Check  |
| <a href="#">PLAT300_ALERT_4_G</a> | Atom Site Occupancy of H8SA Constrained at       | 0.5  | Check  |
| <a href="#">PLAT300_ALERT_4_G</a> | Atom Site Occupancy of H8SB Constrained at       | 0.5  | Check  |
| <a href="#">PLAT300_ALERT_4_G</a> | Atom Site Occupancy of H8SC Constrained at       | 0.5  | Check  |
| <a href="#">PLAT300_ALERT_4_G</a> | Atom Site Occupancy of O12S Constrained at       | 0.5  | Check  |
| <a href="#">PLAT300_ALERT_4_G</a> | Atom Site Occupancy of C15S Constrained at       | 0.5  | Check  |
| <a href="#">PLAT300_ALERT_4_G</a> | Atom Site Occupancy of C16S Constrained at       | 0.5  | Check  |
| <a href="#">PLAT300_ALERT_4_G</a> | Atom Site Occupancy of C17S Constrained at       | 0.5  | Check  |
| <a href="#">PLAT300_ALERT_4_G</a> | Atom Site Occupancy of C18S Constrained at       | 0.5  | Check  |
| <a href="#">PLAT300_ALERT_4_G</a> | Atom Site Occupancy of H16D Constrained at       | 0.5  | Check  |
| <a href="#">PLAT300_ALERT_4_G</a> | Atom Site Occupancy of H16E Constrained at       | 0.5  | Check  |
| <a href="#">PLAT300_ALERT_4_G</a> | Atom Site Occupancy of H17D Constrained at       | 0.5  | Check  |
| <a href="#">PLAT300_ALERT_4_G</a> | Atom Site Occupancy of H17E Constrained at       | 0.5  | Check  |
| <a href="#">PLAT300_ALERT_4_G</a> | Atom Site Occupancy of O1S Constrained at        | 0.25 | Check  |
| <a href="#">PLAT300_ALERT_4_G</a> | Atom Site Occupancy of C1S Constrained at        | 0.25 | Check  |
| <a href="#">PLAT300_ALERT_4_G</a> | Atom Site Occupancy of C2S Constrained at        | 0.25 | Check  |
| <a href="#">PLAT300_ALERT_4_G</a> | Atom Site Occupancy of C3S Constrained at        | 0.25 | Check  |
| <a href="#">PLAT300_ALERT_4_G</a> | Atom Site Occupancy of C4S Constrained at        | 0.25 | Check  |

|                   |                                                  |                |        |        |
|-------------------|--------------------------------------------------|----------------|--------|--------|
| PLAT300 ALERT 4 G | Atom Site Occupancy of H1SA                      | Constrained at | 0.25   | Check  |
| PLAT300 ALERT 4 G | Atom Site Occupancy of H1SB                      | Constrained at | 0.25   | Check  |
| PLAT300 ALERT 4 G | Atom Site Occupancy of H1SC                      | Constrained at | 0.25   | Check  |
| PLAT300 ALERT 4 G | Atom Site Occupancy of H2SA                      | Constrained at | 0.25   | Check  |
| PLAT300 ALERT 4 G | Atom Site Occupancy of H2SB                      | Constrained at | 0.25   | Check  |
| PLAT300 ALERT 4 G | Atom Site Occupancy of H3SA                      | Constrained at | 0.25   | Check  |
| PLAT300 ALERT 4 G | Atom Site Occupancy of H3SB                      | Constrained at | 0.25   | Check  |
| PLAT300 ALERT 4 G | Atom Site Occupancy of H4SA                      | Constrained at | 0.25   | Check  |
| PLAT300 ALERT 4 G | Atom Site Occupancy of H4SB                      | Constrained at | 0.25   | Check  |
| PLAT300 ALERT 4 G | Atom Site Occupancy of H4SC                      | Constrained at | 0.25   | Check  |
| PLAT300 ALERT 4 G | Atom Site Occupancy of O11S                      | Constrained at | 0.25   | Check  |
| PLAT300 ALERT 4 G | Atom Site Occupancy of C11S                      | Constrained at | 0.25   | Check  |
| PLAT300 ALERT 4 G | Atom Site Occupancy of C12S                      | Constrained at | 0.25   | Check  |
| PLAT300 ALERT 4 G | Atom Site Occupancy of C13S                      | Constrained at | 0.25   | Check  |
| PLAT300 ALERT 4 G | Atom Site Occupancy of C14S                      | Constrained at | 0.25   | Check  |
| PLAT300 ALERT 4 G | Atom Site Occupancy of H11A                      | Constrained at | 0.25   | Check  |
| PLAT300 ALERT 4 G | Atom Site Occupancy of H11B                      | Constrained at | 0.25   | Check  |
| PLAT300 ALERT 4 G | Atom Site Occupancy of H12A                      | Constrained at | 0.25   | Check  |
| PLAT300 ALERT 4 G | Atom Site Occupancy of H12B                      | Constrained at | 0.25   | Check  |
| PLAT300 ALERT 4 G | Atom Site Occupancy of H13A                      | Constrained at | 0.25   | Check  |
| PLAT300 ALERT 4 G | Atom Site Occupancy of H13B                      | Constrained at | 0.25   | Check  |
| PLAT300 ALERT 4 G | Atom Site Occupancy of H14A                      | Constrained at | 0.25   | Check  |
| PLAT300 ALERT 4 G | Atom Site Occupancy of H14B                      | Constrained at | 0.25   | Check  |
| PLAT301 ALERT 3 G | Main Residue Disorder .....(Resd 1 )             |                | 7%     | Note   |
| PLAT302 ALERT 4 G | Anion/Solvent/Minor-Residue Disorder (Resd 2 )   |                | 100%   | Note   |
| PLAT302 ALERT 4 G | Anion/Solvent/Minor-Residue Disorder (Resd 3 )   |                | 100%   | Note   |
| PLAT302 ALERT 4 G | Anion/Solvent/Minor-Residue Disorder (Resd 4 )   |                | 100%   | Note   |
| PLAT302 ALERT 4 G | Anion/Solvent/Minor-Residue Disorder (Resd 5 )   |                | 100%   | Note   |
| PLAT304 ALERT 4 G | Non-Integer Number of Atoms in ..... Resd 2      |                | 7.50   | Check  |
| PLAT304 ALERT 4 G | Non-Integer Number of Atoms in ..... Resd 3      |                | 4.50   | Check  |
| PLAT304 ALERT 4 G | Non-Integer Number of Atoms in ..... Resd 4      |                | 3.75   | Check  |
| PLAT304 ALERT 4 G | Non-Integer Number of Atoms in ..... Resd 5      |                | 3.25   | Check  |
| PLAT398 ALERT 2 G | Deviating C-O-C Angle From 120 for O12S          |                | 97.6   | Degree |
| PLAT412 ALERT 2 G | Short Intra XH3 .. XHn H31 ..H42A .              |                | 2.13   | Ang.   |
|                   |                                                  | x,y,z =        | 1_555  | Check  |
| PLAT412 ALERT 2 G | Short Intra XH3 .. XHn H31 ..H42D .              |                | 2.08   | Ang.   |
|                   |                                                  | x,y,z =        | 1_555  | Check  |
| PLAT412 ALERT 2 G | Short Intra XH3 .. XHn H40 ..H42B .              |                | 2.09   | Ang.   |
|                   |                                                  | x,y,z =        | 1_555  | Check  |
| PLAT412 ALERT 2 G | Short Intra XH3 .. XHn H40 ..H42E .              |                | 2.13   | Ang.   |
|                   |                                                  | x,y,z =        | 1_555  | Check  |
| PLAT413 ALERT 2 G | Short Inter XH3 .. XHn H67A ..H77C .             |                | 1.82   | Ang.   |
|                   |                                                  | 1+x,y,z =      | 1_655  | Check  |
| PLAT720 ALERT 4 G | Number of Unusual/Non-Standard Labels .....      |                | 21     | Note   |
| PLAT789 ALERT 4 G | Atoms with Negative _atom_site_disorder_group #  |                | 28     | Check  |
| PLAT790 ALERT 4 G | Centre of Gravity not Within Unit Cell: Resd. #  |                | 2      | Note   |
|                   | C4 H10 O                                         |                |        |        |
| PLAT790 ALERT 4 G | Centre of Gravity not Within Unit Cell: Resd. #  |                | 3      | Note   |
|                   | C4 H4 O                                          |                |        |        |
| PLAT790 ALERT 4 G | Centre of Gravity not Within Unit Cell: Resd. #  |                | 5      | Note   |
|                   | C4 H8 O                                          |                |        |        |
| PLAT794 ALERT 5 G | Tentative Bond Valency for Cu1 (I) .             |                | 0.98   | Info   |
| PLAT860 ALERT 3 G | Number of Least-Squares Restraints .....         |                | 434    | Note   |
| PLAT883 ALERT 1 G | No Info/Value for _atom_sites_solution_primary . |                | Please | Do !   |
| PLAT909 ALERT 3 G | Percentage of I>2sig(I) Data at Theta(Max) Still |                | 48%    | Note   |
| PLAT910 ALERT 3 G | Missing # of FCF Reflection(s) Below Theta(Min). |                | 1      | Note   |
| PLAT912 ALERT 4 G | Missing # of FCF Reflections Above STh/L= 0.600  |                | 57     | Note   |
| PLAT933 ALERT 2 G | Number of OMIT Records in Embedded .res File ... |                | 5      | Note   |
| PLAT978 ALERT 2 G | Number C-C Bonds with Positive Residual Density. |                | 4      | Info   |

0 ALERT level A = Most likely a serious problem - resolve or explain

0 **ALERT level B** = A potentially serious problem, consider carefully  
10 **ALERT level C** = Check. Ensure it is not caused by an omission or oversight  
93 **ALERT level G** = General information/check it is not something unexpected

2 **ALERT type 1** CIF construction/syntax error, inconsistent or missing data  
19 **ALERT type 2** Indicator that the structure model may be wrong or deficient  
8 **ALERT type 3** Indicator that the structure quality may be low  
73 **ALERT type 4** Improvement, methodology, query or suggestion  
1 **ALERT type 5** Informative message, check

---

---

It is advisable to attempt to resolve as many as possible of the alerts in all categories. Often the minor alerts point to easily fixed oversights, errors and omissions in your CIF or refinement strategy, so attention to these fine details can be worthwhile. In order to resolve some of the more serious problems it may be necessary to carry out additional measurements or structure refinements. However, the purpose of your study may justify the reported deviations and the more serious of these should normally be commented upon in the discussion or experimental section of a paper or in the "special\_details" fields of the CIF. checkCIF was carefully designed to identify outliers and unusual parameters, but every test has its limitations and alerts that are not important in a particular case may appear. Conversely, the absence of alerts does not guarantee there are no aspects of the results needing attention. It is up to the individual to critically assess their own results and, if necessary, seek expert advice.

#### **Publication of your CIF in IUCr journals**

A basic structural check has been run on your CIF. These basic checks will be run on all CIFs submitted for publication in IUCr journals (*Acta Crystallographica*, *Journal of Applied Crystallography*, *Journal of Synchrotron Radiation*); however, if you intend to submit to *Acta Crystallographica Section C* or *E* or *IUCrData*, you should make sure that full publication checks are run on the final version of your CIF prior to submission.

#### **Publication of your CIF in other journals**

Please refer to the *Notes for Authors* of the relevant journal for any special instructions relating to CIF submission.

---

**PLATON version of 07/08/2019; check.def file version of 30/07/2019**



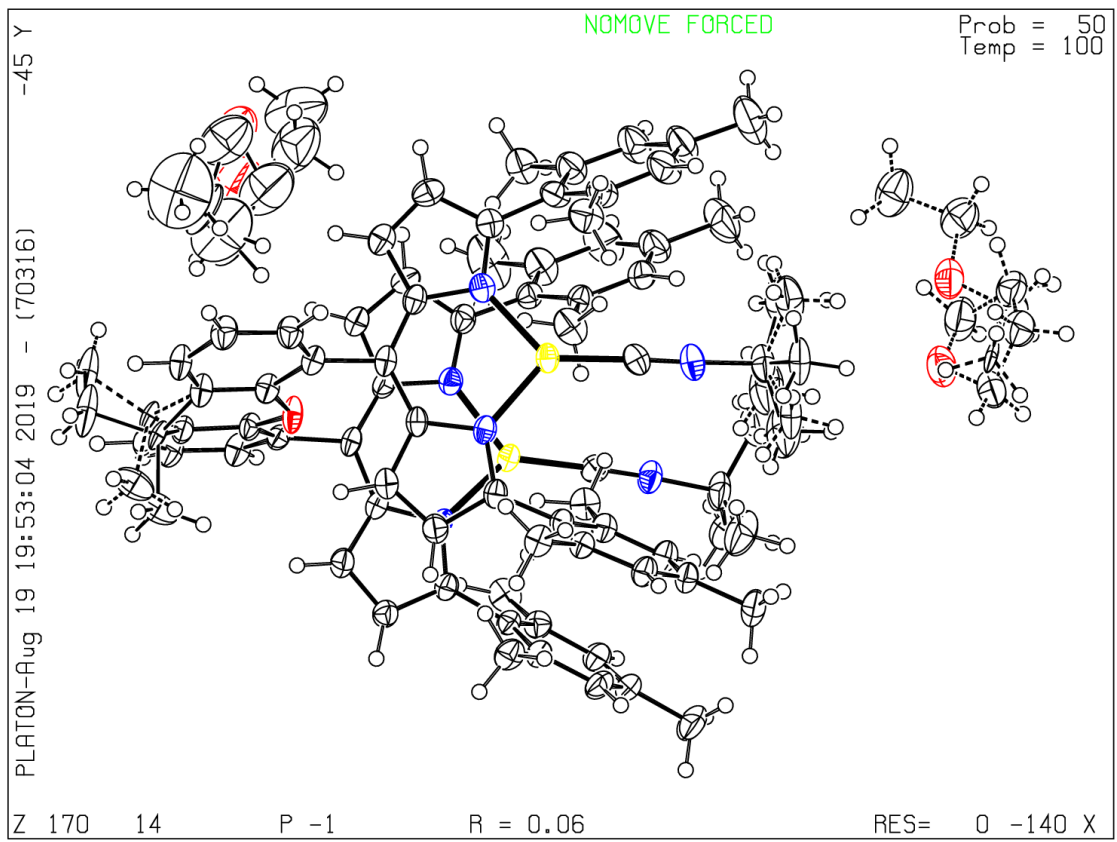

# checkCIF/PLATON report

Structure factors have been supplied for datablock(s) 15

THIS REPORT IS FOR GUIDANCE ONLY. IF USED AS PART OF A REVIEW PROCEDURE FOR PUBLICATION, IT SHOULD NOT REPLACE THE EXPERTISE OF AN EXPERIENCED CRYSTALLOGRAPHIC REFEREE.

No syntax errors found. [CIF dictionary](#) [Interpreting this report](#)

## Datablock: 15

---

Bond precision: C-C = 0.0032 A                      Wavelength=0.71073

Cell:                      a=16.3247(7)              b=18.2917(8)              c=20.5023(9)  
                            alpha=90                      beta=106.300(1)              gamma=90

Temperature:              100 K

|                | Calculated                | Reported          |
|----------------|---------------------------|-------------------|
| Volume         | 5876.0(4)                 | 5876.0(4)         |
| Space group    | P 21/n                    | P 21/n            |
| Hall group     | -P 2yn                    | -P 2yn            |
| Moiety formula | C59 H74 Cu2 N6 O, C4 H8 O | ?                 |
| Sum formula    | C63 H82 Cu2 N6 O2         | C63 H82 Cu2 N6 O2 |
| Mr             | 1082.45                   | 1082.42           |
| Dx,g cm-3      | 1.224                     | 1.224             |
| Z              | 4                         | 4                 |
| Mu (mm-1)      | 0.770                     | 0.770             |
| F000           | 2304.0                    | 2304.0            |
| F000'          | 2307.18                   |                   |
| h,k,lmax       | 19,21,24                  | 19,21,24          |
| Nref           | 10431                     | 10423             |
| Tmin,Tmax      | 0.871,0.912               | 0.688,0.745       |
| Tmin'          | 0.857                     |                   |

Correction method= # Reported T Limits: Tmin=0.688 Tmax=0.745  
AbsCorr = MULTI-SCAN

Data completeness= 0.999                      Theta(max)= 25.065

R(reflections)= 0.0342( 7134)              wR2(reflections)= 0.0716( 10423)

S = 0.911                      Npar= 737

---

The following ALERTS were generated. Each ALERT has the format

**test-name\_ALERT\_alert-type\_alert-level.**

Click on the hyperlinks for more details of the test.

---

● **Alert level C**

|                          |                      |                                 |        |          |
|--------------------------|----------------------|---------------------------------|--------|----------|
| <u>PLAT213 ALERT 2 C</u> | Atom C57             | has ADP max/min Ratio .....     | 3.1    | prolat   |
| <u>PLAT220 ALERT 2 C</u> | Non-Solvent Resd 1 C | Ueq(max)/Ueq(min) Range         | 5.9    | Ratio    |
| <u>PLAT222 ALERT 3 C</u> | Non-Solv. Resd 1 H   | Uiso(max)/Uiso(min) Range       | 5.8    | Ratio    |
| <u>PLAT242 ALERT 2 C</u> | Low 'MainMol' Ueq    | as Compared to Neighbors of     | C56    | Check    |
| <u>PLAT905 ALERT 3 C</u> | Negative K value     | in the Analysis of Variance ... | -0.193 | Report   |
| <u>PLAT911 ALERT 3 C</u> | Missing FCF Refl     | Between Thmin & STh/L= 0.596    |        | 9 Report |

---

● **Alert level G**

|                          |                                        |                       |       |             |
|--------------------------|----------------------------------------|-----------------------|-------|-------------|
| <u>PLAT002 ALERT 2 G</u> | Number of Distance or Angle Restraints | on AtSite             | 19    | Note        |
| <u>PLAT003 ALERT 2 G</u> | Number of Uiso or Uij Restrained       | non-H Atoms ...       | 10    | Report      |
| <u>PLAT171 ALERT 4 G</u> | The CIF-Embedded .res File             | Contains EADP Records | 4     | Report      |
| <u>PLAT175 ALERT 4 G</u> | The CIF-Embedded .res File             | Contains SAME Records | 2     | Report      |
| <u>PLAT176 ALERT 4 G</u> | The CIF-Embedded .res File             | Contains SADI Records | 1     | Report      |
| <u>PLAT187 ALERT 4 G</u> | The CIF-Embedded .res File             | Contains RIGU Records | 2     | Report      |
| <u>PLAT232 ALERT 2 G</u> | Hirshfeld Test Diff (M-X) Cu1          | --C50 .               | 7.5   | s.u.        |
| <u>PLAT232 ALERT 2 G</u> | Hirshfeld Test Diff (M-X) Cu2          | --C55 .               | 5.2   | s.u.        |
| <u>PLAT301 ALERT 3 G</u> | Main Residue Disorder .....            | (Resd 1 )             | 6%    | Note        |
| <u>PLAT302 ALERT 4 G</u> | Anion/Solvent/Minor-Residue            | Disorder (Resd 2 )    | 100%  | Note        |
| <u>PLAT302 ALERT 4 G</u> | Anion/Solvent/Minor-Residue            | Disorder (Resd 3 )    | 100%  | Note        |
| <u>PLAT304 ALERT 4 G</u> | Non-Integer Number of Atoms            | in ..... Resd 2       | 7.66  | Check       |
| <u>PLAT304 ALERT 4 G</u> | Non-Integer Number of Atoms            | in ..... Resd 3       | 5.34  | Check       |
| <u>PLAT398 ALERT 2 G</u> | Deviating C-O-C Angle                  | From 120 for O1S      | 109.2 | Degree      |
| <u>PLAT398 ALERT 2 G</u> | Deviating C-O-C Angle                  | From 120 for O1T      | 109.5 | Degree      |
| <u>PLAT720 ALERT 4 G</u> | Number of Unusual/Non-Standard         | Labels .....          | 16    | Note        |
| <u>PLAT794 ALERT 5 G</u> | Tentative Bond Valency for Cu1         | (I) .                 | 0.94  | Info        |
| <u>PLAT794 ALERT 5 G</u> | Tentative Bond Valency for Cu2         | (I) .                 | 0.95  | Info        |
| <u>PLAT860 ALERT 3 G</u> | Number of Least-Squares                | Restraints .....      | 77    | Note        |
| <u>PLAT883 ALERT 1 G</u> | No Info/Value for _atom_sites_         | solution_primary .    |       | Please Do ! |
| <u>PLAT909 ALERT 3 G</u> | Percentage of I>2sig(I) Data           | at Theta(Max) Still   | 45%   | Note        |
| <u>PLAT978 ALERT 2 G</u> | Number C-C Bonds with Positive         | Residual Density.     | 9     | Info        |

---

- 0 **ALERT level A** = Most likely a serious problem - resolve or explain  
0 **ALERT level B** = A potentially serious problem, consider carefully  
6 **ALERT level C** = Check. Ensure it is not caused by an omission or oversight  
22 **ALERT level G** = General information/check it is not something unexpected

- 1 ALERT type 1 CIF construction/syntax error, inconsistent or missing data  
10 ALERT type 2 Indicator that the structure model may be wrong or deficient  
6 ALERT type 3 Indicator that the structure quality may be low  
9 ALERT type 4 Improvement, methodology, query or suggestion  
2 ALERT type 5 Informative message, check
- 
-

It is advisable to attempt to resolve as many as possible of the alerts in all categories. Often the minor alerts point to easily fixed oversights, errors and omissions in your CIF or refinement strategy, so attention to these fine details can be worthwhile. In order to resolve some of the more serious problems it may be necessary to carry out additional measurements or structure refinements. However, the purpose of your study may justify the reported deviations and the more serious of these should normally be commented upon in the discussion or experimental section of a paper or in the "special\_details" fields of the CIF. checkCIF was carefully designed to identify outliers and unusual parameters, but every test has its limitations and alerts that are not important in a particular case may appear. Conversely, the absence of alerts does not guarantee there are no aspects of the results needing attention. It is up to the individual to critically assess their own results and, if necessary, seek expert advice.

### **Publication of your CIF in IUCr journals**

A basic structural check has been run on your CIF. These basic checks will be run on all CIFs submitted for publication in IUCr journals (*Acta Crystallographica*, *Journal of Applied Crystallography*, *Journal of Synchrotron Radiation*); however, if you intend to submit to *Acta Crystallographica Section C* or *E* or *IUCrData*, you should make sure that full publication checks are run on the final version of your CIF prior to submission.

### **Publication of your CIF in other journals**

Please refer to the *Notes for Authors* of the relevant journal for any special instructions relating to CIF submission.

---

**PLATON version of 07/08/2019; check.def file version of 30/07/2019**

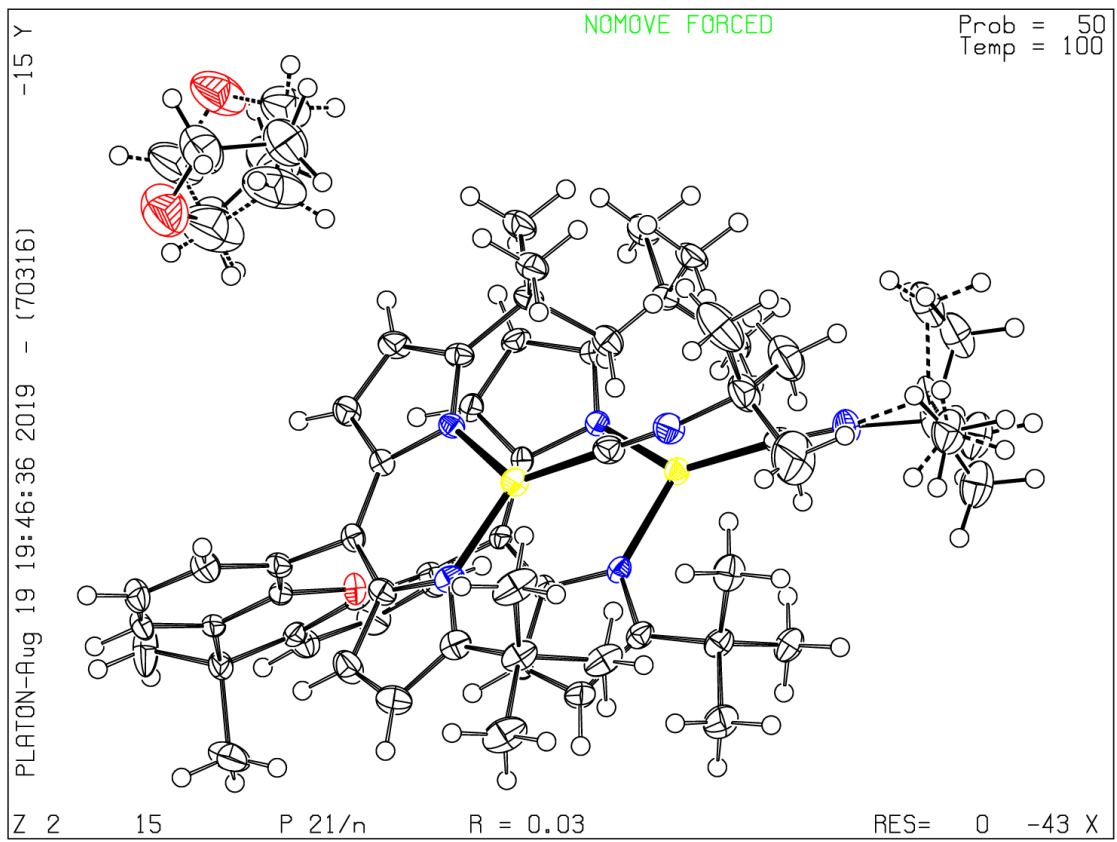

# checkCIF/PLATON report

Structure factors have been supplied for datablock(s) 16

THIS REPORT IS FOR GUIDANCE ONLY. IF USED AS PART OF A REVIEW PROCEDURE FOR PUBLICATION, IT SHOULD NOT REPLACE THE EXPERTISE OF AN EXPERIENCED CRYSTALLOGRAPHIC REFEREE.

No syntax errors found. [CIF dictionary](#) [Interpreting this report](#)

## Datablock: 16

---

|                        |                                                  |                                             |
|------------------------|--------------------------------------------------|---------------------------------------------|
| Bond precision:        | C-C = 0.0081 A                                   | Wavelength=0.71073                          |
| Cell:                  | a=13.3375(5)      b=25.1228(7)      c=25.4322(7) | alpha=90      beta=100.624(3)      gamma=90 |
| Temperature:           | 100 K                                            |                                             |
|                        | Calculated                                       | Reported                                    |
| Volume                 | 8375.6(5)                                        | 8375.6(4)                                   |
| Space group            | P 21/n                                           | P 21/n                                      |
| Hall group             | -P 2yn                                           | -P 2yn                                      |
| Moiety formula         | 4(C83 H84 Cu2 N8 O), 5(C4 H10 O), 7(C4 H8 O)     | ?                                           |
| Sum formula            | C380 H442 Cu8 N32 O16                            | C95 H110.50 Cu2 N8 O4                       |
| Mr                     | 6222.08                                          | 1555.49                                     |
| Dx, g cm <sup>-3</sup> | 1.234                                            | 1.234                                       |
| Z                      | 1                                                | 4                                           |
| Mu (mm <sup>-1</sup> ) | 0.564                                            | 0.564                                       |
| F000                   | 3306.0                                           | 3306.0                                      |
| F000'                  | 3309.58                                          |                                             |
| h,k,lmax               | 15,29,30                                         | 15,29,30                                    |
| Nref                   | 14858                                            | 14837                                       |
| Tmin,Tmax              | 0.893,0.893                                      | 0.688,0.745                                 |
| Tmin'                  | 0.893                                            |                                             |

Correction method= # Reported T Limits: Tmin=0.688 Tmax=0.745  
AbsCorr = MULTI-SCAN

Data completeness= 0.999      Theta(max)= 25.064

R(reflections)= 0.0734( 9062)      wR2(reflections)= 0.2128( 14837)

S = 1.030      Npar= 1153

---

The following ALERTS were generated. Each ALERT has the format

**test-name\_ALERT\_alert-type\_alert-level.**

Click on the hyperlinks for more details of the test.

---

● **Alert level C**

|                                   |                                                  |         |        |
|-----------------------------------|--------------------------------------------------|---------|--------|
| <a href="#">PLAT094_ALERT_2_C</a> | Ratio of Maximum / Minimum Residual Density .... | 3.06    | Report |
| <a href="#">PLAT213_ALERT_2_C</a> | Atom C37 has ADP max/min Ratio .....             | 3.2     | prolat |
| <a href="#">PLAT213_ALERT_2_C</a> | Atom C37A has ADP max/min Ratio .....            | 3.2     | prolat |
| <a href="#">PLAT220_ALERT_2_C</a> | Non-Solv. Resd 1 C Ueq(max)/Ueq(min) Range       | 4.0     | Ratio  |
| <a href="#">PLAT222_ALERT_3_C</a> | Non-Solv. Resd 1 H Uiso(max)/Uiso(min) Range     | 4.4     | Ratio  |
| <a href="#">PLAT230_ALERT_2_C</a> | Hirshfeld Test Diff for N1 --C5 .                | 5.5     | s.u.   |
| <a href="#">PLAT230_ALERT_2_C</a> | Hirshfeld Test Diff for C1 --C2 .                | 5.8     | s.u.   |
| <a href="#">PLAT230_ALERT_2_C</a> | Hirshfeld Test Diff for C8 --C9 .                | 6.1     | s.u.   |
| <a href="#">PLAT234_ALERT_4_C</a> | Large Hirshfeld Difference C7 --C8 .             | 0.16    | Ang.   |
| <a href="#">PLAT260_ALERT_2_C</a> | Large Average Ueq of Residue Including O1S       | 0.137   | Check  |
| <a href="#">PLAT341_ALERT_3_C</a> | Low Bond Precision on C-C Bonds .....            | 0.00808 | Ang.   |
| <a href="#">PLAT906_ALERT_3_C</a> | Large K Value in the Analysis of Variance .....  | 2.816   | Check  |
| <a href="#">PLAT911_ALERT_3_C</a> | Missing FCF Refl Between Thmin & STh/L= 0.596    | 21      | Report |
| <a href="#">PLAT918_ALERT_3_C</a> | Reflection(s) with I(obs) much Smaller I(calc) . | 1       | Check  |
| <a href="#">PLAT971_ALERT_2_C</a> | Check Calcd Resid. Dens. 2.05A From O1S          | 1.85    | eA-3   |

---

● **Alert level G**

|                                   |                                                  |       |        |
|-----------------------------------|--------------------------------------------------|-------|--------|
| <a href="#">PLAT002_ALERT_2_G</a> | Number of Distance or Angle Restraints on AtSite | 62    | Note   |
| <a href="#">PLAT003_ALERT_2_G</a> | Number of Uiso or Uij Restrained non-H Atoms ... | 25    | Report |
| <a href="#">PLAT045_ALERT_1_G</a> | Calculated and Reported Z Differ by a Factor ... | 0.25  | Check  |
| <a href="#">PLAT083_ALERT_2_G</a> | SHELXL Second Parameter in WGHT Unusually Large  | 22.75 | Why ?  |
| <a href="#">PLAT171_ALERT_4_G</a> | The CIF-Embedded .res File Contains EADP Records | 21    | Report |
| <a href="#">PLAT175_ALERT_4_G</a> | The CIF-Embedded .res File Contains SAME Records | 5     | Report |
| <a href="#">PLAT176_ALERT_4_G</a> | The CIF-Embedded .res File Contains SADI Records | 4     | Report |
| <a href="#">PLAT178_ALERT_4_G</a> | The CIF-Embedded .res File Contains SIMU Records | 1     | Report |
| <a href="#">PLAT187_ALERT_4_G</a> | The CIF-Embedded .res File Contains RIGU Records | 5     | Report |
| <a href="#">PLAT300_ALERT_4_G</a> | Atom Site Occupancy of O1S Constrained at        | 0.75  | Check  |
| <a href="#">PLAT300_ALERT_4_G</a> | Atom Site Occupancy of C1S Constrained at        | 0.75  | Check  |
| <a href="#">PLAT300_ALERT_4_G</a> | Atom Site Occupancy of C2S Constrained at        | 0.75  | Check  |
| <a href="#">PLAT300_ALERT_4_G</a> | Atom Site Occupancy of C3S Constrained at        | 0.75  | Check  |
| <a href="#">PLAT300_ALERT_4_G</a> | Atom Site Occupancy of C4S Constrained at        | 0.75  | Check  |
| <a href="#">PLAT300_ALERT_4_G</a> | Atom Site Occupancy of H1SA Constrained at       | 0.75  | Check  |
| <a href="#">PLAT300_ALERT_4_G</a> | Atom Site Occupancy of H1SB Constrained at       | 0.75  | Check  |
| <a href="#">PLAT300_ALERT_4_G</a> | Atom Site Occupancy of H1SC Constrained at       | 0.75  | Check  |
| <a href="#">PLAT300_ALERT_4_G</a> | Atom Site Occupancy of H2SA Constrained at       | 0.75  | Check  |
| <a href="#">PLAT300_ALERT_4_G</a> | Atom Site Occupancy of H2SB Constrained at       | 0.75  | Check  |
| <a href="#">PLAT300_ALERT_4_G</a> | Atom Site Occupancy of H3SA Constrained at       | 0.75  | Check  |
| <a href="#">PLAT300_ALERT_4_G</a> | Atom Site Occupancy of H3SB Constrained at       | 0.75  | Check  |
| <a href="#">PLAT300_ALERT_4_G</a> | Atom Site Occupancy of H4SA Constrained at       | 0.75  | Check  |
| <a href="#">PLAT300_ALERT_4_G</a> | Atom Site Occupancy of H4SB Constrained at       | 0.75  | Check  |
| <a href="#">PLAT300_ALERT_4_G</a> | Atom Site Occupancy of H4SC Constrained at       | 0.75  | Check  |
| <a href="#">PLAT300_ALERT_4_G</a> | Atom Site Occupancy of O3S Constrained at        | 0.5   | Check  |
| <a href="#">PLAT300_ALERT_4_G</a> | Atom Site Occupancy of C11S Constrained at       | 0.5   | Check  |
| <a href="#">PLAT300_ALERT_4_G</a> | Atom Site Occupancy of C12S Constrained at       | 0.5   | Check  |
| <a href="#">PLAT300_ALERT_4_G</a> | Atom Site Occupancy of C13S Constrained at       | 0.5   | Check  |
| <a href="#">PLAT300_ALERT_4_G</a> | Atom Site Occupancy of C14S Constrained at       | 0.5   | Check  |
| <a href="#">PLAT300_ALERT_4_G</a> | Atom Site Occupancy of H11A Constrained at       | 0.5   | Check  |
| <a href="#">PLAT300_ALERT_4_G</a> | Atom Site Occupancy of H11B Constrained at       | 0.5   | Check  |
| <a href="#">PLAT300_ALERT_4_G</a> | Atom Site Occupancy of H11C Constrained at       | 0.5   | Check  |
| <a href="#">PLAT300_ALERT_4_G</a> | Atom Site Occupancy of H12D Constrained at       | 0.5   | Check  |
| <a href="#">PLAT300_ALERT_4_G</a> | Atom Site Occupancy of H12E Constrained at       | 0.5   | Check  |
| <a href="#">PLAT300_ALERT_4_G</a> | Atom Site Occupancy of H13D Constrained at       | 0.5   | Check  |
| <a href="#">PLAT300_ALERT_4_G</a> | Atom Site Occupancy of H13E Constrained at       | 0.5   | Check  |
| <a href="#">PLAT300_ALERT_4_G</a> | Atom Site Occupancy of H14D Constrained at       | 0.5   | Check  |

|                   |                                                  |                     |       |             |
|-------------------|--------------------------------------------------|---------------------|-------|-------------|
| PLAT300 ALERT 4 G | Atom Site Occupancy of H14E                      | Constrained at      | 0.5   | Check       |
| PLAT300 ALERT 4 G | Atom Site Occupancy of H14F                      | Constrained at      | 0.5   | Check       |
| PLAT300 ALERT 4 G | Atom Site Occupancy of O4S                       | Constrained at      | 0.5   | Check       |
| PLAT300 ALERT 4 G | Atom Site Occupancy of C15S                      | Constrained at      | 0.5   | Check       |
| PLAT300 ALERT 4 G | Atom Site Occupancy of C16S                      | Constrained at      | 0.5   | Check       |
| PLAT300 ALERT 4 G | Atom Site Occupancy of C17S                      | Constrained at      | 0.5   | Check       |
| PLAT300 ALERT 4 G | Atom Site Occupancy of C18S                      | Constrained at      | 0.5   | Check       |
| PLAT300 ALERT 4 G | Atom Site Occupancy of H15A                      | Constrained at      | 0.5   | Check       |
| PLAT300 ALERT 4 G | Atom Site Occupancy of H15B                      | Constrained at      | 0.5   | Check       |
| PLAT300 ALERT 4 G | Atom Site Occupancy of H16A                      | Constrained at      | 0.5   | Check       |
| PLAT300 ALERT 4 G | Atom Site Occupancy of H16B                      | Constrained at      | 0.5   | Check       |
| PLAT300 ALERT 4 G | Atom Site Occupancy of H17A                      | Constrained at      | 0.5   | Check       |
| PLAT300 ALERT 4 G | Atom Site Occupancy of H17B                      | Constrained at      | 0.5   | Check       |
| PLAT300 ALERT 4 G | Atom Site Occupancy of H18A                      | Constrained at      | 0.5   | Check       |
| PLAT300 ALERT 4 G | Atom Site Occupancy of H18B                      | Constrained at      | 0.5   | Check       |
| PLAT300 ALERT 4 G | Atom Site Occupancy of O2S                       | Constrained at      | 0.25  | Check       |
| PLAT300 ALERT 4 G | Atom Site Occupancy of C5S                       | Constrained at      | 0.25  | Check       |
| PLAT300 ALERT 4 G | Atom Site Occupancy of C6S                       | Constrained at      | 0.25  | Check       |
| PLAT300 ALERT 4 G | Atom Site Occupancy of C7S                       | Constrained at      | 0.25  | Check       |
| PLAT300 ALERT 4 G | Atom Site Occupancy of C8S                       | Constrained at      | 0.25  | Check       |
| PLAT300 ALERT 4 G | Atom Site Occupancy of H5SA                      | Constrained at      | 0.25  | Check       |
| PLAT300 ALERT 4 G | Atom Site Occupancy of H5SB                      | Constrained at      | 0.25  | Check       |
| PLAT300 ALERT 4 G | Atom Site Occupancy of H6SA                      | Constrained at      | 0.25  | Check       |
| PLAT300 ALERT 4 G | Atom Site Occupancy of H6SB                      | Constrained at      | 0.25  | Check       |
| PLAT300 ALERT 4 G | Atom Site Occupancy of H7SA                      | Constrained at      | 0.25  | Check       |
| PLAT300 ALERT 4 G | Atom Site Occupancy of H7SB                      | Constrained at      | 0.25  | Check       |
| PLAT300 ALERT 4 G | Atom Site Occupancy of H8SA                      | Constrained at      | 0.25  | Check       |
| PLAT300 ALERT 4 G | Atom Site Occupancy of H8SB                      | Constrained at      | 0.25  | Check       |
| PLAT301 ALERT 3 G | Main Residue Disorder .....(Resd 1 )             |                     | 17%   | Note        |
| PLAT302 ALERT 4 G | Anion/Solvent/Minor-Residue Disorder (Resd 2 )   |                     | 100%  | Note        |
| PLAT302 ALERT 4 G | Anion/Solvent/Minor-Residue Disorder (Resd 3 )   |                     | 100%  | Note        |
| PLAT302 ALERT 4 G | Anion/Solvent/Minor-Residue Disorder (Resd 4 )   |                     | 100%  | Note        |
| PLAT302 ALERT 4 G | Anion/Solvent/Minor-Residue Disorder (Resd 5 )   |                     | 100%  | Note        |
| PLAT302 ALERT 4 G | Anion/Solvent/Minor-Residue Disorder (Resd 6 )   |                     | 100%  | Note        |
| PLAT302 ALERT 4 G | Anion/Solvent/Minor-Residue Disorder (Resd 7 )   |                     | 100%  | Note        |
| PLAT304 ALERT 4 G | Non-Integer Number of Atoms in ..... Resd 2      |                     | 11.25 | Check       |
| PLAT304 ALERT 4 G | Non-Integer Number of Atoms in ..... Resd 3      |                     | 7.50  | Check       |
| PLAT304 ALERT 4 G | Non-Integer Number of Atoms in ..... Resd 4      |                     | 6.50  | Check       |
| PLAT304 ALERT 4 G | Non-Integer Number of Atoms in ..... Resd 5      |                     | 8.81  | Check       |
| PLAT304 ALERT 4 G | Non-Integer Number of Atoms in ..... Resd 6      |                     | 3.25  | Check       |
| PLAT304 ALERT 4 G | Non-Integer Number of Atoms in ..... Resd 7      |                     | 4.19  | Check       |
| PLAT398 ALERT 2 G | Deviating C-O-C Angle From 120 for O4S           |                     | 110.0 | Degree      |
| PLAT398 ALERT 2 G | Deviating C-O-C Angle From 120 for O5S           |                     | 107.6 | Degree      |
| PLAT398 ALERT 2 G | Deviating C-O-C Angle From 120 for O5T           |                     | 107.8 | Degree      |
| PLAT411 ALERT 2 G | Short Inter H...H Contact H13E ..H16             |                     | 2.06  | Ang.        |
|                   |                                                  | x,y,z =             | 1_555 | Check       |
| PLAT413 ALERT 2 G | Short Inter XH3 .. XHn H21 ..H43D                |                     | 1.98  | Ang.        |
|                   |                                                  | 1/2+x,3/2-y,1/2+z = | 4_676 | Check       |
| PLAT413 ALERT 2 G | Short Inter XH3 .. XHn H34C ..H48A               |                     | 2.04  | Ang.        |
|                   |                                                  | 1/2+x,3/2-y,1/2+z = | 4_676 | Check       |
| PLAT413 ALERT 2 G | Short Inter XH3 .. XHn H80 ..H42F                |                     | 2.08  | Ang.        |
|                   |                                                  | 1/2+x,3/2-y,1/2+z = | 4_676 | Check       |
| PLAT720 ALERT 4 G | Number of Unusual/Non-Standard Labels .....      |                     | 19    | Note        |
| PLAT722 ALERT 1 G | Angle Calc 111.00, Rep 109.80 Dev...             |                     | 1.20  | Degree      |
|                   | C21T -C22T -H22D 1.555 1.555 1.555               | #                   | 532   | Check       |
| PLAT790 ALERT 4 G | Centre of Gravity not Within Unit Cell: Resd. #  |                     | 4     | Note        |
|                   | C4 H8 O                                          |                     |       |             |
| PLAT794 ALERT 5 G | Tentative Bond Valency for Cu1 (I)               |                     | 0.88  | Info        |
| PLAT794 ALERT 5 G | Tentative Bond Valency for Cu2 (I)               |                     | 0.86  | Info        |
| PLAT811 ALERT 5 G | No ADDSYM Analysis: Too Many Excluded Atoms .... |                     | !     | Info        |
| PLAT860 ALERT 3 G | Number of Least-Squares Restraints .....         |                     | 369   | Note        |
| PLAT883 ALERT 1 G | No Info/Value for _atom_sites_solution_primary . |                     |       | Please Do ! |



|                   |                                                  |          |
|-------------------|--------------------------------------------------|----------|
| PLAT909 ALERT 3 G | Percentage of I>2sig(I) Data at Theta(Max) Still | 34% Note |
| PLAT933 ALERT 2 G | Number of OMIT Records in Embedded .res File ... | 2 Note   |
| PLAT978 ALERT 2 G | Number C-C Bonds with Positive Residual Density. | 1 Info   |

---

0 **ALERT level A** = Most likely a serious problem - resolve or explain  
0 **ALERT level B** = A potentially serious problem, consider carefully  
15 **ALERT level C** = Check. Ensure it is not caused by an omission or oversight  
96 **ALERT level G** = General information/check it is not something unexpected

3 ALERT type 1 CIF construction/syntax error, inconsistent or missing data  
21 ALERT type 2 Indicator that the structure model may be wrong or deficient  
8 ALERT type 3 Indicator that the structure quality may be low  
76 ALERT type 4 Improvement, methodology, query or suggestion  
3 ALERT type 5 Informative message, check

---

It is advisable to attempt to resolve as many as possible of the alerts in all categories. Often the minor alerts point to easily fixed oversights, errors and omissions in your CIF or refinement strategy, so attention to these fine details can be worthwhile. In order to resolve some of the more serious problems it may be necessary to carry out additional measurements or structure refinements. However, the purpose of your study may justify the reported deviations and the more serious of these should normally be commented upon in the discussion or experimental section of a paper or in the "special\_details" fields of the CIF. checkCIF was carefully designed to identify outliers and unusual parameters, but every test has its limitations and alerts that are not important in a particular case may appear. Conversely, the absence of alerts does not guarantee there are no aspects of the results needing attention. It is up to the individual to critically assess their own results and, if necessary, seek expert advice.

### Publication of your CIF in IUCr journals

A basic structural check has been run on your CIF. These basic checks will be run on all CIFs submitted for publication in IUCr journals (*Acta Crystallographica*, *Journal of Applied Crystallography*, *Journal of Synchrotron Radiation*); however, if you intend to submit to *Acta Crystallographica Section C* or *E* or *IUCrData*, you should make sure that full publication checks are run on the final version of your CIF prior to submission.

### Publication of your CIF in other journals

Please refer to the *Notes for Authors* of the relevant journal for any special instructions relating to CIF submission.

---

**PLATON version of 07/08/2019; check.def file version of 30/07/2019**

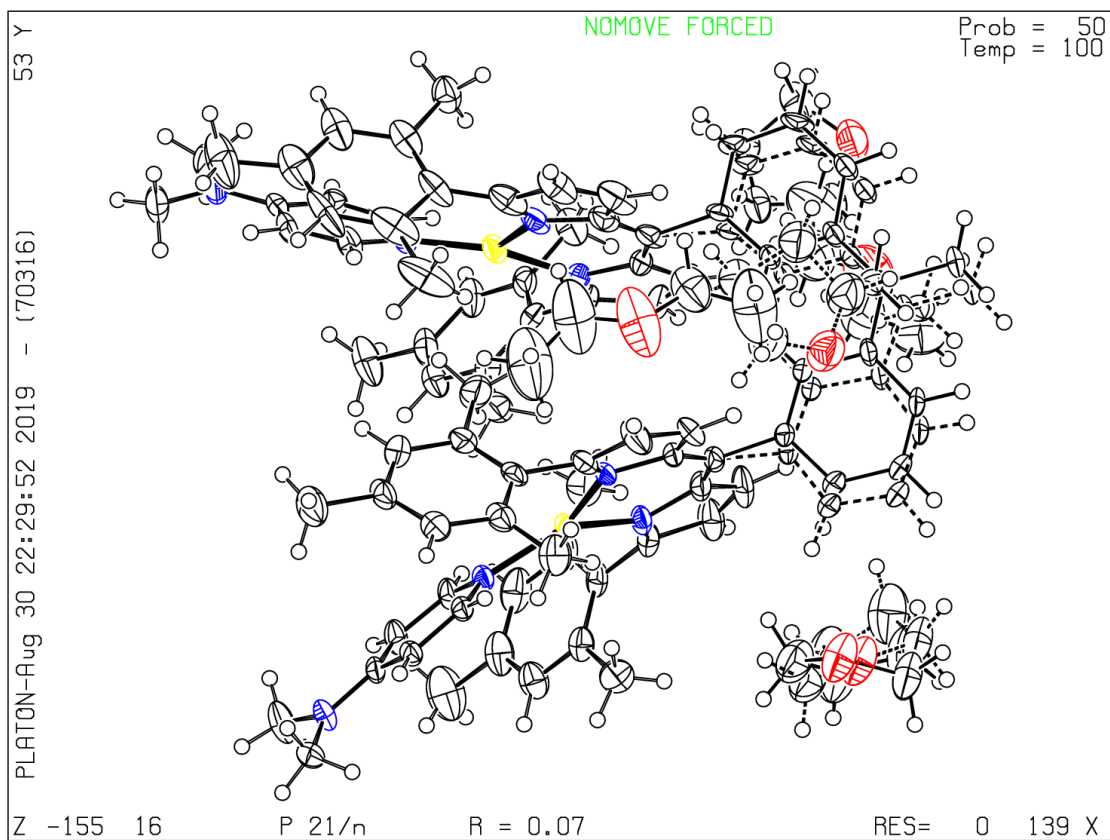

# checkCIF/PLATON report

Structure factors have been supplied for datablock(s) 18

THIS REPORT IS FOR GUIDANCE ONLY. IF USED AS PART OF A REVIEW PROCEDURE FOR PUBLICATION, IT SHOULD NOT REPLACE THE EXPERTISE OF AN EXPERIENCED CRYSTALLOGRAPHIC REFEREE.

No syntax errors found.

[CIF dictionary](#)

[Interpreting this report](#)

## Datablock: 18

---

Bond precision: C-C = 0.0041 A                      Wavelength=0.71073

Cell:                      a=11.189(9)              b=17.657(12)              c=22.207(15)  
                            alpha=90              beta=95.88(2)              gamma=90  
Temperature:              100 K

|                | Calculated         | Reported           |
|----------------|--------------------|--------------------|
| Volume         | 4364(5)            | 4364(6)            |
| Space group    | P 21/n             | P 21/n             |
| Hall group     | -P 2yn             | -P 2yn             |
| Moiety formula | C46 H50 Cl4 Cu2 N4 | ?                  |
| Sum formula    | C46 H50 Cl4 Cu2 N4 | C46 H50 Cl4 Cu2 N4 |
| Mr             | 927.80             | 927.78             |
| Dx,g cm-3      | 1.412              | 1.412              |
| Z              | 4                  | 4                  |
| Mu (mm-1)      | 1.257              | 1.257              |
| F000           | 1920.0             | 1920.0             |
| F000'          | 1925.34            |                    |
| h,k,lmax       | 13,21,26           | 13,21,26           |
| Nref           | 7799               | 7739               |
| Tmin,Tmax      | 0.578,0.695        | 0.546,0.745        |
| Tmin'          | 0.535              |                    |

Correction method= # Reported T Limits: Tmin=0.546 Tmax=0.745  
AbsCorr = MULTI-SCAN

Data completeness= 0.992                      Theta(max)= 25.130

R(reflections)= 0.0354( 6072)              wR2(reflections)= 0.0921( 7739)

S = 1.027                      Npar= 517

---

The following ALERTS were generated. Each ALERT has the format

**test-name\_ALERT\_alert-type\_alert-level.**

Click on the hyperlinks for more details of the test.

---

**Alert level C**

|                          |                                                 |      |           |
|--------------------------|-------------------------------------------------|------|-----------|
| <u>PLAT094 ALERT 2 C</u> | Ratio of Maximum / Minimum Residual Density ... | 2.41 | Report    |
| <u>PLAT911 ALERT 3 C</u> | Missing FCF Refl Between Thmin & STh/L= 0.597   |      | 55 Report |

---

**Alert level G**

|                          |                                                  |      |             |
|--------------------------|--------------------------------------------------|------|-------------|
| <u>PLAT794 ALERT 5 G</u> | Tentative Bond Valency for Cu1 (I) .             | 0.79 | Info        |
| <u>PLAT794 ALERT 5 G</u> | Tentative Bond Valency for Cu2 (I) .             | 0.80 | Info        |
| <u>PLAT883 ALERT 1 G</u> | No Info/Value for _atom_sites_solution_primary . |      | Please Do ! |
| <u>PLAT909 ALERT 3 G</u> | Percentage of I>2sig(I) Data at Theta(Max) Still | 64%  | Note        |
| <u>PLAT954 ALERT 1 G</u> | Reported (CIF) and Actual (FCF) Kmax Differ by . |      | 1 Units     |
| <u>PLAT978 ALERT 2 G</u> | Number C-C Bonds with Positive Residual Density. |      | 6 Info      |

---

- 0 **ALERT level A** = Most likely a serious problem - resolve or explain  
0 **ALERT level B** = A potentially serious problem, consider carefully  
2 **ALERT level C** = Check. Ensure it is not caused by an omission or oversight  
6 **ALERT level G** = General information/check it is not something unexpected
- 2 ALERT type 1 CIF construction/syntax error, inconsistent or missing data  
2 ALERT type 2 Indicator that the structure model may be wrong or deficient  
2 ALERT type 3 Indicator that the structure quality may be low  
0 ALERT type 4 Improvement, methodology, query or suggestion  
2 ALERT type 5 Informative message, check
- 

It is advisable to attempt to resolve as many as possible of the alerts in all categories. Often the minor alerts point to easily fixed oversights, errors and omissions in your CIF or refinement strategy, so attention to these fine details can be worthwhile. In order to resolve some of the more serious problems it may be necessary to carry out additional measurements or structure refinements. However, the purpose of your study may justify the reported deviations and the more serious of these should normally be commented upon in the discussion or experimental section of a paper or in the "special\_details" fields of the CIF. checkCIF was carefully designed to identify outliers and unusual parameters, but every test has its limitations and alerts that are not important in a particular case may appear. Conversely, the absence of alerts does not guarantee there are no aspects of the results needing attention. It is up to the individual to critically assess their own results and, if necessary, seek expert advice.

### Publication of your CIF in IUCr journals

A basic structural check has been run on your CIF. These basic checks will be run on all CIFs submitted for publication in IUCr journals (*Acta Crystallographica*, *Journal of Applied Crystallography*, *Journal of Synchrotron Radiation*); however, if you intend to submit to *Acta Crystallographica Section C* or *E* or *IUCrData*, you should make sure that full publication checks are run on the final version of your CIF prior to submission.

### Publication of your CIF in other journals

Please refer to the *Notes for Authors* of the relevant journal for any special instructions relating to CIF submission.

---

**PLATON version of 07/08/2019; check.def file version of 30/07/2019**

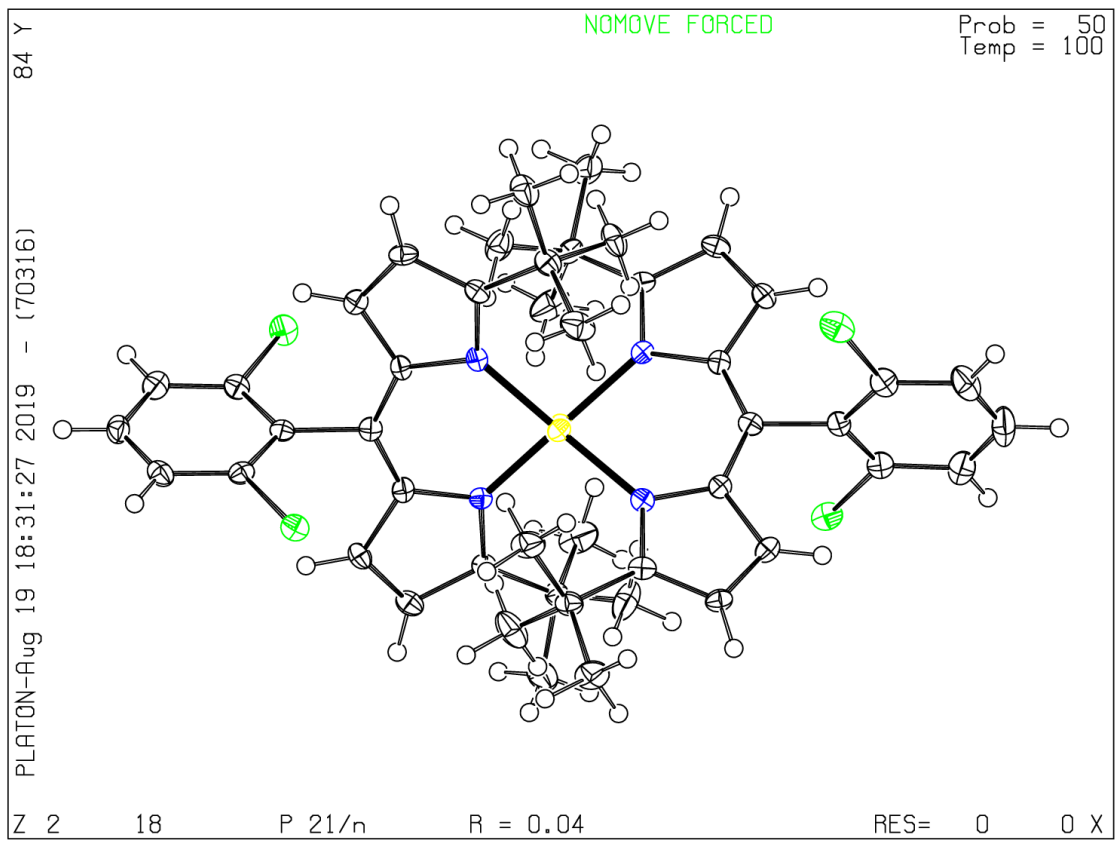

Supplement: NIHMS1591182-supplement-2019_JACS_Karsch_SI.pdf [file NIHMS1591182-supplement-2019_JACS_Karsch_SI.pdf]
